# Supplementary material for: A squaramide-catalysed asymmetric cascade Michael addition/acyl transfer reaction between unsaturated benzothiophenones and α-nitroketones
Source: Royal Society of Chemistry journal article supplement (doi:10.1039/d1ob02217b), 2021-12-29
Supplement: d1ob02217b1.pdf [file d1ob02217b1.pdf]

# A Squaramide-catalysed Asymmetric Cascade Michael Addition/Acyl Transfer Reaction between Unsaturated Benzothiophenones and $\alpha$ -Nitroketones

Cheng Niu and Da-Ming Du\*

*Key Laboratory of Medical Molecule Science & Pharmaceuticals Engineering, Ministry of Industry and Information Technology, School of Chemistry and Chemical Engineering, Beijing Institute of Technology, Beijing 100081, People's Republic of China*

E-mail: [dudm@bit.edu.cn](mailto:dudm@bit.edu.cn)

## *Supporting Information*

### **Content**

|                                                                                   |    |
|-----------------------------------------------------------------------------------|----|
| 1. General information and starting materials.....                                | 1  |
| 2. Enantioselective synthesis and characterization of compounds <b>3</b> .....    | 2  |
| 3. Enantioselective synthesis and characterization of compounds <b>5</b> .....    | 13 |
| 4. Enantioselective synthesis and characterization of compound <b>6</b> .....     | 18 |
| 5. Crystal data and structure refinement for <b>3ka</b> .....                     | 19 |
| 6. Copies of <sup>1</sup> H and <sup>13</sup> C NMR spectra of new compounds..... | 20 |
| 7. Copies of HPLC chromatograms of new products.....                              | 88 |

## 1. General information and starting materials

**General information.** Commercially available reagents were used without further purification. Column chromatography was performed with silica gel (200-300 mesh). Melting points were determined with an XT-4 melting-point apparatus and are uncorrected. <sup>1</sup>H NMR spectra were measured with Bruker Ascend 400 MHz spectrometer in CDCl<sub>3</sub>, chemical shifts were reported in  $\delta$  (ppm) units relative to tetramethylsilane (TMS) as the internal standard. <sup>13</sup>C NMR spectra were measured at 100 MHz (or 176 MHz) with a Bruker Ascend 400 MHz (or 700 MHz) spectrometer, chemical shifts were reported in  $\delta$  (ppm) relative to tetramethylsilane and referenced to the solvent peak (CDCl<sub>3</sub> at 77.0 ppm). High resolution mass spectra were measured with an Agilent 6520 Accurate-Mass-Q-TOF MS system equipped with an electrospray ionization (ESI) source. Enantiomeric excesses were determined by chiral HPLC analysis using an Agilent 1200 LC instrument with a Daicel Chiralpak IC or AD-H column. Optical rotations were measured with a Krüss P8000 polarimeter at the indicated concentration with the units of grams per 100 mL.

**Starting materials.** **1a–1l** and **3a–3f** were prepared according to the literature.<sup>[1]</sup> **2a–2m** were prepared as described in the literature.<sup>[2]</sup> The squaramide organocatalysts were prepared by following the reported procedures.<sup>[3]</sup>

- [1] Y. Zhang, A. Yu, J. Jia, S. Ma, K. Li, Y. Wei and X. Meng, *Chem. Commun. (Camb)*, 2017, **53**, 10672-10675. b) V. Dočekal, B. Formánek, I. Císařová and J. Veselý, *Org. Chem. Front.*, 2019, **6**, 3259-3263.
- [2] H. H. Nguyen and M. J. Kurth, *Org. Lett.*, 2013, **15**, 362-365. b) R. Maity, C. Gharui, A. K. Sil and S. C. Pan, *Org. Lett.*, 2017, **19**, 662-665.
- [3] a) Y. Zhu, J. P. Malerich and V. H. Rawal, *Angew. Chem. Int. Ed.*, 2010, **49**, 153-156. b) W. Yang, D. M. Du, *Org. Lett.* 2010, **12**, 5450–5453. c) W. Yang, D. M. Du, *Adv. Synth. Catal.*, 2011, **353**, 1241–1246.

## 2. Enantioselective synthesis and characterization of compounds 3

Unsaturated benzothiophene **1a** (0.12 mmol),  $\alpha$ -nitroketones **2** (0.10 mmol), and catalyst **C3** (0.0025 mmol) were dissolved in CH<sub>2</sub>Cl<sub>2</sub> (1.0 mL), and the mixture was stirred at room temperature for 48 h. After completion of the reaction, the residue was purified by flash column chromatography on silica gel (petroleum ether/ethyl acetate = 10:1 to 8:1) to afford the pure products **3**. Racemates were prepared following a similar procedure with Et<sub>3</sub>N (2.5 mol%).

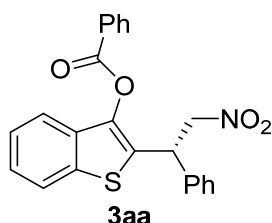

**(S)-2-(2-Nitro-1-phenylethyl)benzo[b]thiophen-3-yl benzoate (3aa)**. White solid (42.8 mg, 95% yield), mp 87–89 °C. HPLC (Daicel Chiralpak IC, *n*-hexane/2-propanol = 70:30, flow rate 1.0 mL/min, detection at 254 nm):  $t_R$  = 7.2 min (major),  $t_R$  = 8.7 min (minor); 96% *ee*.  $[\alpha]_D^{25}$  = +56.6° ( $c$  = 1.58, CH<sub>2</sub>Cl<sub>2</sub>). <sup>1</sup>H NMR (400 MHz, CDCl<sub>3</sub>):  $\delta$  8.27 – 8.25 (m, 2H, ArH), 7.69 – 7.66 (m, 2H, ArH), 7.55 (t,  $J$  = 7.8 Hz, 2H, ArH), 7.47 – 7.45 (m, 1H, ArH), 7.33 – 7.24 (m, 7H, ArH), 5.28 (t,  $J$  = 8.0 Hz, 1H, CH), 5.04 (d,  $J$  = 7.8 Hz, 2H, CH<sub>2</sub>) ppm. <sup>13</sup>C NMR (100 MHz, CDCl<sub>3</sub>):  $\delta$  164.2, 138.1, 137.3, 135.8, 134.2, 132.5, 130.4, 129.3, 129.1, 128.8, 128.2, 128.1, 127.4, 125.4, 124.8, 122.8, 120.7, 78.0, 41.8 ppm. HRMS (ESI):  $m/z$  calcd. for C<sub>23</sub>H<sub>21</sub>N<sub>2</sub>O<sub>4</sub>S [M + NH<sub>4</sub>]<sup>+</sup> 421.1217, found 421.1215.

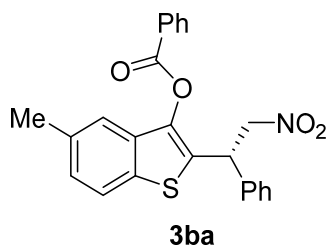

**(S)-5-Methyl-2-(2-nitro-1-phenylethyl)benzo[b]thiophen-3-yl benzoate (3ba)**. Colorless oil (33.8 mg, 81% yield). HPLC (Daicel Chiralpak IC, *n*-hexane/2-propanol = 70:30, flow rate 1.0 mL/min, detection at 254 nm):  $t_R$  = 7.0 min (major),  $t_R$  = 7.7 min (minor); 96% *ee*.  $[\alpha]_D^{25}$  = +55.4° ( $c$  = 1.84, CH<sub>2</sub>Cl<sub>2</sub>). <sup>1</sup>H NMR (400 MHz, CDCl<sub>3</sub>):  $\delta$  8.29 – 8.27 (m, 2H, ArH), 7.71 (t,  $J$  = 7.4 Hz, 1H, ArH), 7.60 – 7.56 (m, 3H, ArH), 7.32 – 7.25 (m, 6H, ArH), 7.16 (dd,  $J_1$  = 8.4,  $J_2$  = 1.2 Hz, 1H, ArH), 5.26 (t,  $J$  = 8.0 Hz, 1H, CH), 5.05 (d,  $J$  = 8.0 Hz, 2H, ArH), 2.38 (s, 3H, CH<sub>3</sub>) ppm. <sup>13</sup>C NMR (100 MHz, CDCl<sub>3</sub>):  $\delta$  164.3, 137.8, 137.4, 134.9, 134.2, 133.1, 132.8, 130.5, 129.3, 129.1, 128.8, 128.3, 128.1, 127.4, 127.2, 122.5, 120.5, 78.1, 41.8, 21.4 ppm. HRMS (ESI):  $m/z$  calcd. for C<sub>24</sub>H<sub>23</sub>N<sub>2</sub>O<sub>4</sub>S [M + NH<sub>4</sub>]<sup>+</sup> 435.1374, found 435.1366; calcd. for C<sub>24</sub>H<sub>19</sub>NO<sub>4</sub>SK [M + K]<sup>+</sup> 456.0666, found 456.0664.

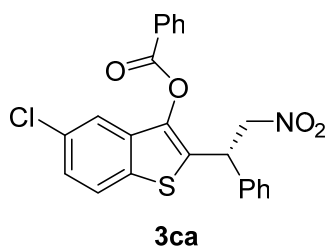

**(S)-5-Chloro-2-(2-nitro-1-phenylethyl)benzo[b]thiophen-3-yl benzoate (3ca).** Colorless oil (41.6 mg, 95% yield). HPLC (Daicel Chiralpak IC, *n*-hexane/2-propanol = 95:5, flow rate 1.0 mL/min, detection at 254 nm):  $t_R = 15.7$  min (major),  $t_R = 19.7$  min (minor); 97% *ee*.  $[\alpha]_D^{25} = +62.6^\circ$  ( $c = 2.13$ ,  $\text{CH}_2\text{Cl}_2$ ).  $^1\text{H NMR}$  (400 MHz,  $\text{CDCl}_3$ ):  $\delta$  8.27 – 8.25 (m, 2H, ArH), 7.72 (t,  $J = 7.4$  Hz, 1H, ArH), 7.62 – 7.56 (m, 3H, ArH), 7.44 (d,  $J = 1.6$  Hz, 1H, ArH), 7.32 – 7.27 (m, 6H, ArH), 5.26 (t,  $J = 8.0$  Hz, 1H, CH), 5.05 (d,  $J = 8.0$  Hz, 2H,  $\text{CH}_2$ ) ppm.  $^{13}\text{C NMR}$  (100 MHz,  $\text{CDCl}_3$ ):  $\delta$  164.1, 137.4, 137.1, 134.4, 133.9, 133.8, 131.6, 131.4, 130.5, 129.2, 128.9, 128.3, 127.9, 127.4, 126.0, 123.9, 120.4, 77.9, 41.9 ppm. HRMS (ESI):  $m/z$  calcd. for  $\text{C}_{23}\text{H}_{20}\text{ClN}_2\text{O}_4\text{S}$   $[\text{M} + \text{NH}_4]^+$  455.0827, found 455.0829; calcd. for  $\text{C}_{23}\text{H}_{16}\text{ClNO}_4\text{SNa}$   $[\text{M} + \text{Na}]^+$  460.0381, found 460.0384.

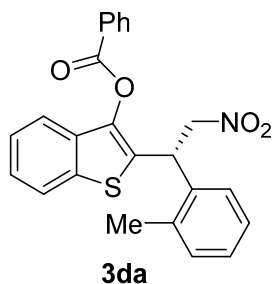

**(S)-2-(2-Nitro-1-(*o*-tolyl)ethyl)benzo[b]thiophen-3-yl benzoate (3da).** Colorless oil (38.0 mg, 91% yield). HPLC (Daicel Chiralpak IC, *n*-hexane/2-propanol = 95:5, flow rate 1.0 mL/min, detection at 254 nm):  $t_R = 14.0$  min (major),  $t_R = 20.6$  min (minor); 94% *ee*.  $[\alpha]_D^{25} = +68.1^\circ$  ( $c = 1.10$ ,  $\text{CH}_2\text{Cl}_2$ ).  $^1\text{H NMR}$  (400 MHz,  $\text{CDCl}_3$ ):  $\delta$  8.28 – 8.26 (m, 2H, ArH), 7.74 – 7.67 (m, 2H, ArH), 7.58 (t,  $J = 7.8$  Hz, 2H, ArH), 7.48 – 7.46 (m, 1H, ArH), 7.39 – 7.37 (m, 1H, ArH), 7.34 – 7.31 (m, 2H, ArH), 7.24 – 7.14 (m, 3H, ArH), 5.51 (dd,  $J_1 = 8.8$  Hz,  $J_2 = 7.2$  Hz, 1H, CH), 5.15 – 5.04 (m, 2H,  $\text{CH}_2$ ), 2.34 (s, 3H,  $\text{CH}_3$ ) ppm.  $^{13}\text{C NMR}$  (100 MHz,  $\text{CDCl}_3$ ):  $\delta$  164.3, 138.1, 136.7, 136.0, 135.7, 134.3, 132.5, 131.3, 130.5, 129.2, 128.9, 128.2, 128.1, 126.6, 125.4, 125.1, 124.8, 122.8, 120.7, 77.6, 37.6, 19.3 ppm. HRMS (ESI):  $m/z$  calcd. for  $\text{C}_{24}\text{H}_{23}\text{N}_2\text{O}_4\text{S}$   $[\text{M} + \text{NH}_4]^+$  435.1374, found 435.1367; calcd. for  $\text{C}_{24}\text{H}_{19}\text{NO}_4\text{SK}$   $[\text{M} + \text{K}]^+$  456.0666, found 456.0663.

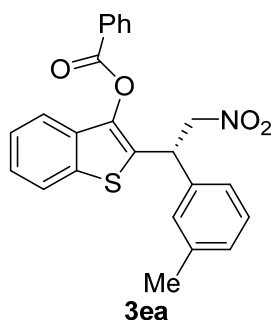

**(S)-2-(2-Nitro-1-(*m*-tolyl)ethyl)benzo[*b*]thiophen-3-yl benzoate (3ea).** Colorless oil (35.9 mg, 86% yield). HPLC (Daicel Chiralpak IC, *n*-hexane/2-propanol = 70:30, flow rate 1.0 mL/min, detection at 254 nm):  $t_R$  = 6.7 min (major),  $t_R$  = 8.0 min (minor); 95% *ee*.  $[\alpha]_D^{25}$  = +60.1° ( $c$  = 0.79, CH<sub>2</sub>Cl<sub>2</sub>). <sup>1</sup>H NMR (400 MHz, CDCl<sub>3</sub>): δ 8.27 (d,  $J$  = 7.2 Hz, 2H, ArH), 7.73 – 7.70 (m, 2H, ArH), 7.58 (t,  $J$  = 7.8 Hz, 1H, ArH), 7.48 – 7.46 (m, 1H, ArH), 7.34 – 7.32 (m, 2H, ArH), 7.21 (t,  $J$  = 7.4 Hz, 1H, ArH), 7.13 (d,  $J$  = 8.4 Hz, 2H, ArH), 7.07 (d,  $J$  = 7.6 Hz, 1H, ArH), 5.24 (t,  $J$  = 8.0 Hz, 1H, CH), 5.06 (d,  $J$  = 8.0 Hz, 2H, CH<sub>2</sub>), 2.27 (s, 3H, CH<sub>3</sub>) ppm. <sup>13</sup>C NMR (100 MHz, CDCl<sub>3</sub>): δ 164.2, 138.9, 138.1, 137.2, 135.8, 134.2, 132.6, 130.5, 129.4, 129.01, 128.96, 128.8, 128.3, 125.4, 124.8, 124.3, 122.8, 120.7, 78.1, 41.8, 21.4 ppm. HRMS (ESI):  $m/z$  calcd. for C<sub>24</sub>H<sub>23</sub>N<sub>2</sub>O<sub>4</sub>S [M + NH<sub>4</sub>]<sup>+</sup> 435.1374, found 435.1365; calcd. for C<sub>24</sub>H<sub>19</sub>NO<sub>4</sub>SK [M + K]<sup>+</sup> 456.0666, found 456.0660.

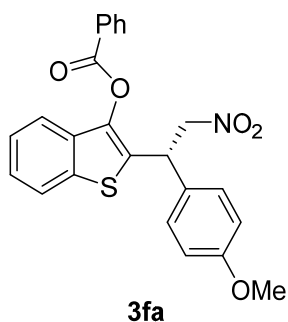

**(S)-2-(1-(4-Methoxyphenyl)-2-nitroethyl)benzo[*b*]thiophen-3-yl benzoate (3fa).** Colorless oil (36.8 mg, 86% yield). HPLC (Daicel Chiralpak IC, *n*-hexane/2-propanol = 70:30, flow rate 1.0 mL/min, detection at 254 nm):  $t_R$  = 9.8 min (major),  $t_R$  = 11.5 min (minor); 93% *ee*.  $[\alpha]_D^{25}$  = +61.1° ( $c$  = 0.43, CH<sub>2</sub>Cl<sub>2</sub>). <sup>1</sup>H NMR (400 MHz, CDCl<sub>3</sub>): δ 8.28 – 8.27 (m, 2H, ArH), 7.74 – 7.70 (m, 2H, ArH), 7.59 (t,  $J$  = 7.6 Hz, 2H, ArH), 7.48 – 7.46 (m, 1H, ArH), 7.35 – 7.32 (m, 2H, ArH), 7.26 (d,  $J$  = 8.4 Hz, 2H, ArH), 6.84 (d,  $J$  = 8.8 Hz, 2H, ArH), 5.25 (dd,  $J_1$  = 8.4 Hz,  $J_2$  = 7.6 Hz, 1H, CH), 5.05 – 5.02 (m, 2H, CH<sub>2</sub>), 3.76 (s, 3H, CH<sub>3</sub>) ppm. <sup>13</sup>C NMR (100 MHz, CDCl<sub>3</sub>): δ 164.3, 159.4, 137.9, 135.8, 134.3, 132.7, 130.5, 129.8, 129.4, 128.9, 128.6, 128.3, 125.4, 124.9, 122.9, 120.7, 114.5, 78.4, 55.3, 41.2 ppm. HRMS (ESI):  $m/z$  calcd. for C<sub>24</sub>H<sub>23</sub>N<sub>2</sub>O<sub>5</sub>S [M + NH<sub>4</sub>]<sup>+</sup> 451.1323, found 451.1322; calcd. for C<sub>24</sub>H<sub>19</sub>NO<sub>5</sub>SK [M + K]<sup>+</sup> 472.0616, found 472.0617.

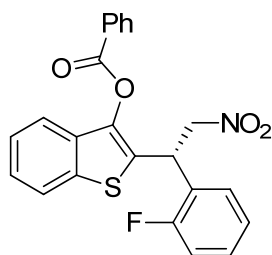

**3ga**

**(S)-2-(1-(2-Fluorophenyl)-2-nitroethyl)benzo[*b*]thiophen-3-yl benzoate (3ga).** Colorless oil (37.9 mg, 90% yield). HPLC (Daicel Chiralpak IC, *n*-hexane/2-propanol = 70:30, flow rate 1.0 mL/min, detection at 254 nm):  $t_R$  = 6.6 min (major),  $t_R$  = 8.2 min (minor); 95% *ee*.  $[\alpha]_D^{25}$  = +47.7° ( $c$  = 1.73, CH<sub>2</sub>Cl<sub>2</sub>). <sup>1</sup>H NMR (400 MHz, CDCl<sub>3</sub>): δ 8.28 – 8.26 (m, 2H, ArH), 7.73 – 7.69 (m, 2H, ArH), 7.57 (t,  $J$  = 7.8 Hz, 2H, ArH), 7.48 – 7.46 (m, 1H, ArH), 7.38 – 7.32 (m, 3H, ArH), 7.27 – 7.22 (m, 1H, ArH), 7.08 (t,  $J$  = 7.6 Hz, 1H, ArH), 7.06 – 7.01 (m, 1H, ArH), 5.58 (t,  $J$  = 7.8 Hz, 1H, CH), 5.10 (d,  $J$  = 8.0 Hz, 2H, CH<sub>2</sub>) ppm. <sup>13</sup>C NMR (100 MHz, CDCl<sub>3</sub>): δ 157.2, 153.4 (d, <sup>1</sup> $J_{C-F}$  = 245.9 Hz), 131.5, 128.7, 127.2, 125.5, 123.5, 123.0 (d, <sup>3</sup> $J_{C-F}$  = 8.3 Hz), 121.8, 121.6 (d, <sup>3</sup> $J_{C-F}$  = 3.5 Hz), 121.2, 120.7, 118.5, 117.9, 117.7 (d, <sup>4</sup> $J_{C-F}$  = 3.5 Hz), 117.5 (d, <sup>2</sup> $J_{C-F}$  = 13.8 Hz), 115.8, 113.8, 109.2 (d, <sup>2</sup> $J_{C-F}$  = 21.8 Hz), 69.9 (d, <sup>4</sup> $J_{C-F}$  = 2.8 Hz), 28.9 (d, <sup>3</sup> $J_{C-F}$  = 3.0 Hz) ppm. HRMS (ESI):  $m/z$  calcd. for C<sub>23</sub>H<sub>16</sub>FNO<sub>4</sub>SNa [M + Na]<sup>+</sup> 444.0677, found 444.0682; calcd. for C<sub>23</sub>H<sub>16</sub>FNO<sub>4</sub>SK [M + K]<sup>+</sup> 460.0416, found 460.0420.

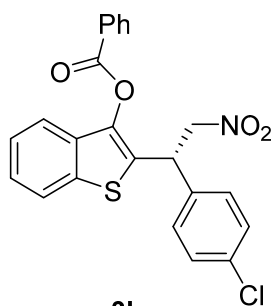

**3ha**

**(S)-2-(1-(4-Chlorophenyl)-2-nitroethyl)benzo[*b*]thiophen-3-yl benzoate (3ha).** Colorless oil (39.3 mg, 90% yield). HPLC (Daicel Chiralpak IC, *n*-hexane/2-propanol = 70:30, flow rate 1.0 mL/min, detection at 254 nm):  $t_R$  = 6.6 min (major),  $t_R$  = 8.2 min (minor); 93% *ee*.  $[\alpha]_D^{25}$  = +65.4° ( $c$  = 1.88, CH<sub>2</sub>Cl<sub>2</sub>). <sup>1</sup>H NMR (400 MHz, CDCl<sub>3</sub>): δ 8.26 – 8.24 (m, 2H, ArH), 7.73 – 7.70 (m, 2H, ArH), 7.58 (t,  $J$  = 7.8 Hz, 2H, ArH), 7.49 – 7.47 (m, 1H, ArH), 7.35 – 7.33 (m, 2H, ArH), 7.27 (s, 4H, ArH), 5.25 (dd,  $J_1$  = 8.8 Hz,  $J_2$  = 7.2 Hz, 1H, CH), 5.08 – 4.98 (m, 2H, CH<sub>2</sub>) ppm. <sup>13</sup>C NMR (100 MHz, CDCl<sub>3</sub>): δ 164.2, 138.3, 135.8, 135.7, 134.3, 134.2, 132.5, 130.5, 129.3, 128.9, 128.8, 128.5, 128.1, 125.6, 125.0, 122.8, 120.8, 77.9, 41.2 ppm. HRMS (ESI):  $m/z$  calcd. for C<sub>23</sub>H<sub>16</sub>ClNO<sub>4</sub>SNa [M + Na]<sup>+</sup> 460.0381, found 460.0387; calcd. for C<sub>23</sub>H<sub>16</sub>ClNO<sub>4</sub>SK [M + K]<sup>+</sup> 476.0120, found 476.0124.

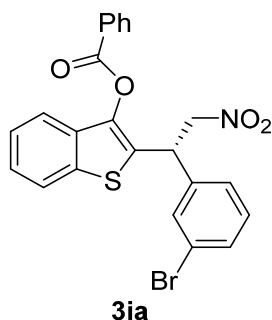

**(S)-2-(1-(3-Bromophenyl)-2-nitroethyl)benzo[*b*]thiophen-3-yl benzoate (3ia).** Colorless oil (42.8 mg, 89% yield). HPLC (Daicel Chiralpak IC, *n*-hexane/2-propanol = 70:30, flow rate 1.0 mL/min, detection at 254 nm):  $t_R = 7.9$  min (major),  $t_R = 9.4$  min (minor); 96% *ee*.  $[\alpha]_D^{25} = +50.6^\circ$  ( $c = 2.03$ ,  $\text{CH}_2\text{Cl}_2$ ).  $^1\text{H NMR}$  (400 MHz,  $\text{CDCl}_3$ ):  $\delta$  8.26 (dd,  $J = 8.2, 1.0$  Hz, 2H, ArH), 7.74 – 7.69 (m, 2H, ArH), 7.58 (t,  $J = 7.6$  Hz, 2H, ArH), 7.49 – 7.47 (m, 2H, ArH), 7.40 – 7.38 (m, 1H, ArH), 7.35 – 7.30 (m, 2H, ArH), 7.27 (d,  $J = 7.6$  Hz, 1H, ArH), 7.17 (t,  $J = 7.8$  Hz, 1H, ArH), 5.23 (dd,  $J_1 = 8.8$  Hz,  $J_2 = 7.2$  Hz, 1H, CH), 5.08 – 4.99 (m, 2H) ppm.  $^{13}\text{C NMR}$  (100 MHz,  $\text{CDCl}_3$ ):  $\delta$  164.2, 139.5, 138.4, 135.7, 134.3, 132.5, 131.4, 130.7, 130.6, 130.5, 128.9, 128.2, 128.0, 126.0, 125.6, 125.0, 123.1, 122.8, 120.8, 77.7, 41.4 ppm. HRMS (ESI):  $m/z$  calcd. for  $\text{C}_{23}\text{H}_{20}^{79}\text{BrN}_2\text{O}_4\text{S}$   $[\text{M} + \text{NH}_4]^+$  499.0322, found 499.0320,  $\text{C}_{23}\text{H}_{20}^{81}\text{BrN}_2\text{O}_4\text{S}$   $[\text{M} + \text{NH}_4]^+$  501.0302, found 501.0304.

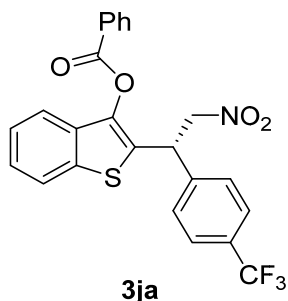

**(S)-2-(2-Nitro-1-(4-(trifluoromethyl)phenyl)ethyl)benzo[*b*]thiophen-3-yl benzoate (3ja).** White solid (44.3 mg, 94% yield), mp 130–131 °C. HPLC (Daicel Chiralpak IC, *n*-hexane/2-propanol = 70:30, flow rate 1.0 mL/min, detection at 254 nm):  $t_R = 5.5$  min (major),  $t_R = 6.6$  min (minor); 97% *ee*.  $[\alpha]_D^{25} = +54.3^\circ$  ( $c = 2.13$ ,  $\text{CH}_2\text{Cl}_2$ ).  $^1\text{H NMR}$  (400 MHz,  $\text{CDCl}_3$ ):  $\delta$  8.24 – 8.22 (m, 2H), 7.74 – 7.70 (m, 2H, ArH), 7.57 (t,  $J = 8.8$  Hz, 4H ArH), 7.50 – 7.45 (m, 3H ArH), 7.36 – 7.34 (m, 2H, ArH), 5.33 (t,  $J = 7.8$  Hz, 1H, CH), 5.08 (d,  $J = 8.0$  Hz, 2H,  $\text{CH}_2$ ) ppm.  $^{13}\text{C NMR}$  (100 MHz,  $\text{CDCl}_3$ ):  $\delta$  164.2, 141.3, 138.5, 135.7, 134.4, 132.5, 130.438 (q,  $^1J_{\text{C-F}} = 32.6$  Hz), 130.436, 128.9, 127.99, 127.95, 127.8, 126.1 (q,  $^2J_{\text{C-F}} = 3.7$  Hz), 125.7, 125.1, 122.9, 122.4, 120.8, 77.6, 41.6 ppm. HRMS (ESI):  $m/z$  calcd. for  $\text{C}_{24}\text{H}_{20}\text{F}_3\text{N}_2\text{O}_4\text{S}$   $[\text{M} + \text{NH}_4]^+$  489.1091, found 489.1091; calcd. for  $\text{C}_{24}\text{H}_{16}\text{F}_3\text{NO}_4\text{SK}$   $[\text{M} + \text{K}]^+$  510.0384, found 510.0384.

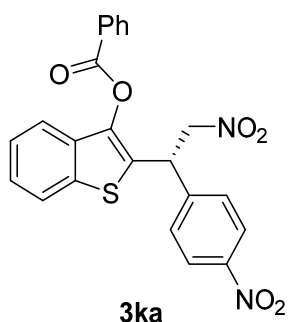

**(S)-2-(2-Nitro-1-(4-nitrophenyl)ethyl)benzo[*b*]thiophen-3-yl benzoate (3ka).** White solid (39.5 mg, 88% yield), mp 138–139 °C. HPLC (Daicel Chiralpak IC, *n*-hexane/2-propanol = 70:30, flow rate 1.0 mL/min, detection at 254 nm):  $t_R = 21.4$  min (major),  $t_R = 25.1$  min (minor); 94% *ee*.  $[\alpha]_D^{25} = +37.8^\circ$  ( $c = 2.00$ ,  $\text{CH}_2\text{Cl}_2$ ).  $^1\text{H NMR}$  (400 MHz,  $\text{CDCl}_3$ ):  $\delta$  8.24 – 8.22 (m, 2H, ArH), 8.16 (d,  $J = 8.8$  Hz, 2H, ArH), 7.76 – 7.72 (m, 2H, ArH), 7.59 (t,  $J = 7.8$  Hz, 1H ArH), 7.53 – 7.49 (m, 3H ArH), 7.40 – 7.35 (m, 2H, ArH), 5.38 (t,  $J = 7.8$  Hz, 1H, CH), 5.11 (d,  $J = 7.6$  Hz, 2H,  $\text{CH}_2$ ) ppm.  $^{13}\text{C NMR}$  (176 MHz,  $\text{CDCl}_3$ ):  $\delta$  164.2, 147.6, 144.4, 138.8, 135.7, 134.6, 132.4, 130.4, 129.0, 128.6, 127.8, 127.0, 125.9, 125.2, 124.3, 122.9, 120.9, 77.4, 41.5 ppm. HRMS (ESI):  $m/z$  calcd. for  $\text{C}_{23}\text{H}_{20}\text{N}_2\text{O}_6\text{S}$   $[\text{M} + \text{NH}_4]^+$  466.1068, found 466.1079; calcd. for  $\text{C}_{23}\text{H}_{16}\text{N}_2\text{O}_6\text{SNa}$   $[\text{M} + \text{Na}]^+$  471.0621, found 471.0637.

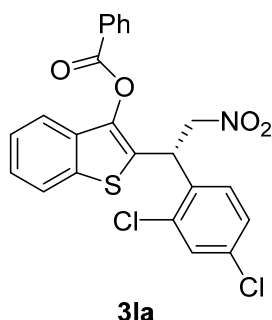

**(S)-2-(1-(2,4-Dichlorophenyl)-2-nitroethyl)benzo[*b*]thiophen-3-yl benzoate (3la).** Colorless oil (39.1 mg, 83% yield). HPLC (Daicel Chiralpak IC, *n*-hexane/2-propanol = 70:30, flow rate 1.0 mL/min, detection at 254 nm):  $t_R = 6.4$  min (major),  $t_R = 7.8$  min (minor); 95% *ee*.  $[\alpha]_D^{25} = +25.4^\circ$  ( $c = 1.87$ ,  $\text{CH}_2\text{Cl}_2$ ).  $^1\text{H NMR}$  (400 MHz,  $\text{CDCl}_3$ ):  $\delta$  8.24 – 8.22 (m, 2H, ArH), 7.74 – 7.69 (m, 2H, ArH), 7.56 (t,  $J = 7.6$  Hz, 2H, ArH), 7.50 – 7.46 (m, 1H, ArH), 7.39 – 7.32 (m, 4H, ArH), 7.20 (dd,  $J_1 = 8.4$ ,  $J_2 = 2.0$  Hz Hz, 1H, ArH), 5.77 (t,  $J = 8.0$  Hz, 1H, CH), 5.07 – 5.04 (m, 2H,  $\text{CH}_2$ ) ppm.  $^{13}\text{C NMR}$  (100 MHz,  $\text{CDCl}_3$ ):  $\delta$  164.2, 138.9, 135.7, 134.8, 134.7, 134.3, 133.5, 132.5, 130.4, 130.2, 128.8, 128.5, 128.1, 127.8, 126.7, 125.7, 125.0, 122.8, 120.9, 76.6, 38.0 ppm. HRMS (ESI):  $m/z$  calcd. for  $\text{C}_{23}\text{H}_{19}\text{Cl}_2\text{N}_2\text{O}_4\text{S}$   $[\text{M} + \text{NH}_4]^+$  489.0438, found 489.0442; calcd. for  $\text{C}_{23}\text{H}_{15}\text{Cl}_2\text{NO}_4\text{SK}$   $[\text{M} + \text{K}]^+$  509.9730, found 509.9731.



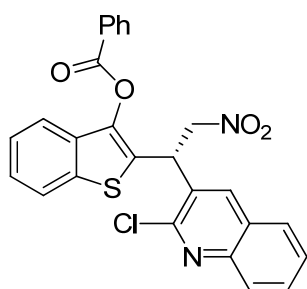

**3ma**

**(S)-2-(1-(2-Chloroquinolin-3-yl)-2-nitroethyl)benzo[b]thiophen-3-yl benzoate (3ma).**

Colorless oil (32.2 mg, 89% yield). HPLC (Daicel Chiralpak IC, *n*-hexane/2-propanol = 70:30, flow rate 1.0 mL/min, detection at 254 nm):  $t_R = 13.1$  min (major),  $t_R = 15.3$  min (minor); 98% *ee*.  $[\alpha]_D^{25} = +129.5^\circ$  ( $c = 1.63$ ,  $\text{CH}_2\text{Cl}_2$ ).  $^1\text{H NMR}$  (400 MHz,  $\text{CDCl}_3$ ):  $\delta$  8.21 (s, 1H, ArH), 8.17 – 8.15 (m, 2H, ArH), 7.97 (d,  $J = 8.4$  Hz, 1H, ArH), 7.75 – 7.65 (m, 4H, ArH), 7.53 – 7.48 (m, 4H, ArH), 7.38 – 7.35 (m, 2H, ArH), 5.86 (t,  $J = 8.0$  Hz, 1H, CH), 5.22 (qd,  $J_1 = 14.0$ ,  $J_2 = 8.4$  Hz, 2H,  $\text{CH}_2$ ) ppm.  $^{13}\text{C NMR}$  (100 MHz,  $\text{CDCl}_3$ ):  $\delta$  164.3, 149.9, 146.9, 139.2, 136.3, 135.8, 134.3, 132.7, 131.0, 130.4, 129.0, 128.8, 128.2, 127.8, 127.6, 126.8, 126.2, 125.8, 125.1, 122.8, 120.9, 76.3, 38.8 ppm. HRMS (ESI):  $m/z$  calcd. for  $\text{C}_{27}\text{H}_{17}\text{Cl}_2\text{NO}_4\text{S}$   $[\text{M} + \text{H}]^+$  489.0671, found 489.0658; calcd. for  $\text{C}_{27}\text{H}_{16}\text{Cl}_2\text{NO}_4\text{SK}$   $[\text{M} + \text{K}]^+$  527.0229, found 527.0227.

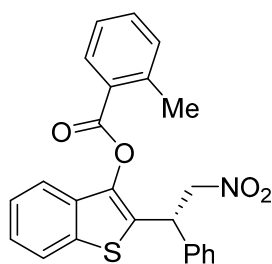

**3ab**

**(S)-2-(2-Nitro-1-phenylethyl)benzo[b]thiophen-3-yl 2-methylbenzoate (3ab).**

Colorless oil (28.8 mg, 69% yield). HPLC (Daicel Chiralpak IC, *n*-hexane/2-propanol = 70:30, flow rate 1.0 mL/min, detection at 254 nm):  $t_R = 6.2$  min (major),  $t_R = 6.9$  min (minor); 97% *ee*.  $[\alpha]_D^{25} = 53.5^\circ$  ( $c = 0.70$ ,  $\text{CH}_2\text{Cl}_2$ ).  $^1\text{H NMR}$  (400 MHz,  $\text{CDCl}_3$ ):  $\delta$  8.29 (dd,  $J_1 = 7.8$  Hz,  $J_2 = 1.0$  Hz, 1H, ArH), 7.73 – 7.71 (m, 1H, ArH), 7.56 (td,  $J_1 = 7.4$  Hz,  $J_2 = 1.2$  Hz, 1H, ArH), 7.51 – 7.49 (m, 1H, ArH), 7.42 – 7.27 (m, 9H, ArH), 5.29 (t,  $J = 8.0$  Hz, 1H, CH), 5.08 (d,  $J = 8.0$  Hz, 2H,  $\text{CH}_2$ ), 2.68 (s, 3H,  $\text{CH}_3$ ) ppm.  $^{13}\text{C NMR}$  (100 MHz,  $\text{CDCl}_3$ ):  $\delta$  164.6, 142.1, 138.2, 137.4, 135.8, 133.4, 132.7, 132.2, 131.4, 129.2, 129.1, 128.2, 127.4, 127.2, 126.2, 125.4, 124.9, 122.9, 120.7, 78.1, 41.8, 22.0 ppm. HRMS (ESI):  $m/z$  calcd. for  $\text{C}_{24}\text{H}_{23}\text{N}_2\text{O}_4$   $[\text{M} + \text{NH}_4]^+$  435.1363, found 435.1363.

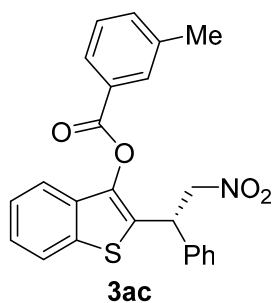

**(S)-2-(2-Nitro-1-phenylethyl)benzo[*b*]thiophen-3-yl 3-methylbenzoate (3ac).** White solid (38.0 mg, 91% yield), mp 77–78 °C. HPLC (Daicel Chiralpak IC, *n*-hexane/2-propanol = 70:30, flow rate 1.0 mL/min, detection at 254 nm):  $t_R$  = 7.3 min (major),  $t_R$  = 9.3 min (minor); 95% *ee*.  $[\alpha]_D^{25}$  = +40.5° ( $c$  = 1.87, CH<sub>2</sub>Cl<sub>2</sub>). <sup>1</sup>H NMR (400 MHz, CDCl<sub>3</sub>): δ 8.09 – 8.07 (m, 2H, ArH), 7.72 – 7.69 (m, 1H, ArH), 7.52 (d,  $J$  = 7.6 Hz, 1H, ArH), 7.48 – 7.44 (m, 2H, ArH), 7.33 – 7.27 (m, 7H, ArH), 5.28 (t,  $J$  = 8.0 Hz, 1H, CH), 5.06 (d,  $J$  = 8.0 Hz, 2H, CH<sub>2</sub>), 2.48 (s, 3H, CH<sub>3</sub>). <sup>13</sup>C NMR (100 MHz, CDCl<sub>3</sub>): δ 164.5, 138.8, 138.2, 137.4, 135.8, 135.0, 132.6, 131.0, 129.3, 129.1, 128.8, 128.2, 128.1, 127.6, 127.4, 125.4, 124.8, 122.8, 120.7, 78.1, 41.8, 21.3 ppm. HRMS (ESI):  $m/z$  calcd. for C<sub>24</sub>H<sub>23</sub>N<sub>2</sub>O<sub>4</sub>S [M + NH<sub>4</sub>]<sup>+</sup> 435.1373, found 435.1363.

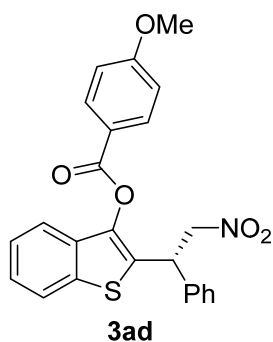

**(S)-2-(2-Nitro-1-phenylethyl)benzo[*b*]thiophen-3-yl 4-methoxybenzoate (3ad).** Colorless oil (41.1 mg, 95% yield). HPLC (Daicel Chiralpak IC, *n*-hexane/2-propanol = 70:30, flow rate 1.0 mL/min, detection at 254 nm):  $t_R$  = 10.0 min (major),  $t_R$  = 12.9 min (minor); 95% *ee*.  $[\alpha]_D^{25}$  = +63.0° ( $c$  = 1.91, CH<sub>2</sub>Cl<sub>2</sub>). <sup>1</sup>H NMR (400 MHz, CDCl<sub>3</sub>): δ 8.24 – 8.21 (m, 2H, ArH), 7.70 – 7.62 (m, 1H, ArH), 7.49 – 7.45 (m, 1H, ArH), 7.36 – 7.26 (m, 7H, ArH), 7.05 – 7.03 (m, 2H, ArH), 5.27 (t,  $J$  = 7.8 Hz, 1H, CH), 5.06 (d,  $J$  = 8.0 Hz, 2H, CH<sub>2</sub>), 3.91 (s, 3H, CH<sub>3</sub>) ppm. <sup>13</sup>C NMR (100 MHz, CDCl<sub>3</sub>): δ 164.4, 163.9, 138.3, 137.5, 135.8, 132.73, 132.67, 129.2, 129.1, 128.2, 127.4, 125.3, 124.8, 122.8, 120.8, 120.4, 114.1, 78.0, 55.6, 41.8 ppm. HRMS (ESI):  $m/z$  calcd. for C<sub>24</sub>H<sub>19</sub>NO<sub>5</sub>SNa [M + Na]<sup>+</sup> 456.0877, found 456.0877; calcd. for C<sub>24</sub>H<sub>19</sub>NO<sub>5</sub>SK [M + K]<sup>+</sup> 472.0616, found 472.0613.

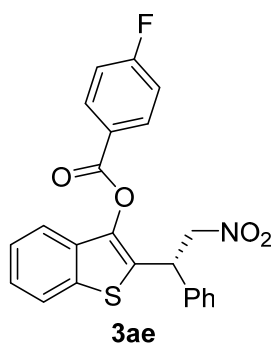

**(S)-2-(2-Nitro-1-phenylethyl)benzo[*b*]thiophen-3-yl 4-fluorobenzoate (3ae).** White solid (33.3 mg, 79% yield), mp 96–97 °C. HPLC (Daicel Chiralpak IC, *n*-hexane/2-propanol = 70:30, flow rate 1.0 mL/min, detection at 254 nm):  $t_R$  = 7.1 min (major),  $t_R$  = 8.5 min (minor); 95% *ee*.  $[\alpha]_D^{25}$  = +64.4° ( $c$  = 1.28, CH<sub>2</sub>Cl<sub>2</sub>). <sup>1</sup>H NMR (400 MHz, CDCl<sub>3</sub>): δ 8.30 – 8.26 (m, 2H, ArH), 7.73 – 7.69 (m, 1H, ArH), 7.47 – 7.43 (m, 1H, ArH), 7.35 – 7.22 (m, 9H, ArH), 5.27 (t,  $J$  = 8.0 Hz, 1H, CH), 5.05 (d,  $J$  = 7.6 Hz, 2H, CH<sub>2</sub>) ppm. <sup>13</sup>C NMR (100 MHz, CDCl<sub>3</sub>): δ 166.5 (d, <sup>1</sup> $J_{C-F}$  = 244.9 Hz), 163.3, 138.0, 137.3, 135.8, 133.2 (d, <sup>3</sup> $J_{C-F}$  = 9.5 Hz), 132.5, 129.4, 129.1, 128.2, 127.4, 125.5, 124.9, 124.5 (d, <sup>4</sup> $J_{C-F}$  = 3.0 Hz), 122.9, 120.6, 116.2 (d, <sup>2</sup> $J_{C-F}$  = 22.2 Hz), 78.2, 41.8 ppm. HRMS (ESI):  $m/z$  calcd. for C<sub>23</sub>H<sub>20</sub>FN<sub>2</sub>O<sub>4</sub>S [M + NH<sub>4</sub>]<sup>+</sup> 439.1123, found 439.1121; calcd. for C<sub>23</sub>H<sub>16</sub>FNO<sub>4</sub>SNa [M + Na]<sup>+</sup> 444.0677, found 444.0672.

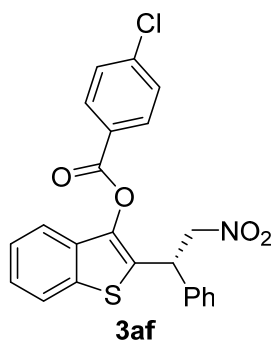

**(S)-2-(2-Nitro-1-phenylethyl)benzo[*b*]thiophen-3-yl 4-chlorobenzoate (3af).** White solid (39.3 mg, 90% yield), mp 97–98 °C. HPLC (Daicel Chiralpak IC, *n*-hexane/2-propanol = 70:30, flow rate 1.0 mL/min, detection at 254 nm):  $t_R$  = 7.5 min (major),  $t_R$  = 9.2 min (minor); 96% *ee*.  $[\alpha]_D^{25}$  = +12.1° ( $c$  = 4.79, CH<sub>2</sub>Cl<sub>2</sub>). <sup>1</sup>H NMR (400 MHz, CDCl<sub>3</sub>): 8.19 (d,  $J$  = 8.4 Hz, 2H, ArH), 7.73 – 7.71 (m, 1H, ArH), 7.55 (d,  $J$  = 8.4 Hz, 2H, ArH), 7.46 – 7.42 (m, 1H, ArH), 7.35 – 7.27 (m, 7H, ArH), 5.26 (t,  $J$  = 8.0 Hz, 1H, CH), 5.05 (d,  $J$  = 8.0 Hz, 2H, CH<sub>2</sub>) ppm. <sup>13</sup>C NMR (100 MHz, CDCl<sub>3</sub>): δ 163.4, 140.9, 137.9, 137.3, 135.8, 132.4, 131.8, 129.4, 129.3, 129.2, 128.3, 127.4, 126.7, 125.5, 124.9, 122.9, 120.6, 78.2, 41.8 ppm. HRMS (ESI):  $m/z$  calcd. for C<sub>23</sub>H<sub>20</sub>ClN<sub>2</sub>O<sub>4</sub>S [M + NH<sub>4</sub>]<sup>+</sup> 455.0827, found 455.0825; calcd. for C<sub>23</sub>H<sub>16</sub>ClNO<sub>4</sub>SK [M + K]<sup>+</sup> 476.0120, found 476.0122.

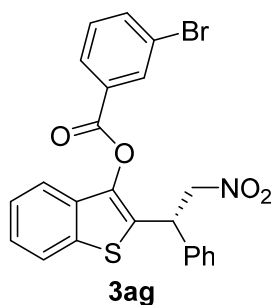

**(S)-2-(2-Nitro-1-phenylethyl)benzo[b]thiophen-3-yl 3-bromobenzoate(3ag).** White solid (32.2 mg, 67% yield), mp 105–107 °C. HPLC (Daicel Chiralpak IC, *n*-hexane/2-propanol = 70:30, flow rate 1.0 mL/min, detection at 254 nm):  $t_R = 7.4$  min (major),  $t_R = 8.8$  min (minor); 92% *ee*.  $[\alpha]_D^{25} = +44.6^\circ$  ( $c = 1.04$ ,  $\text{CH}_2\text{Cl}_2$ ).  $^1\text{H}$  NMR (400 MHz,  $\text{CDCl}_3$ ):  $\delta$  8.37 (t,  $J = 1.6$  Hz, 1H, ArH), 8.19 (d,  $J = 8.0$  Hz, 1H, ArH), 7.85 – 8.83 (m, 1H, ArH), 7.74 – 7.71 (m, 1H, ArH), 7.48 – 7.44 (m, 2H, ArH), 7.36 – 7.28 (m, 7H, ArH), 5.26 (t,  $J = 8.0$  Hz, 1H, CH), 5.06 (d,  $J = 8.0$  Hz, 2H,  $\text{CH}_2$ ) ppm.  $^{13}\text{C}$  NMR (100 MHz,  $\text{CDCl}_3$ ):  $\delta$  163.0, 137.8, 137.24, 137.19, 135.8, 133.4, 132.3, 130.4, 130.1, 129.5, 129.2, 129.0, 128.3, 127.4, 125.5, 124.9, 122.92, 122.88, 120.6, 78.2, 41.8 ppm. HRMS (ESI):  $m/z$  calcd. for  $\text{C}_{23}\text{H}_{20}^{79}\text{BrN}_2\text{O}_4\text{S}$  [ $\text{M} + \text{NH}_4$ ] $^+$  499.0322, found 499.0274,  $\text{C}_{23}\text{H}_{20}^{81}\text{BrN}_4\text{O}_4\text{S}$  [ $\text{M} + \text{NH}_4$ ] $^+$  501.0302, found 501.0257.

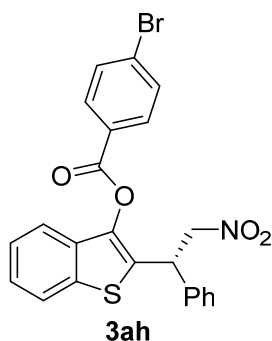

**(S)-2-(2-Nitro-1-phenylethyl)benzo[b]thiophen-3-yl 4-bromobenzoate (3ah).** Colorless oil (40.4 mg, 84% yield). HPLC (Daicel Chiralpak IC, *n*-hexane/2-propanol = 70:30, flow rate 1.0 mL/min, detection at 254 nm):  $t_R = 7.9$  min (major),  $t_R = 9.8$  min (minor); 96% *ee*.  $[\alpha]_D^{25} = +64.1^\circ$  ( $c = 1.69$ ,  $\text{CH}_2\text{Cl}_2$ ).  $^1\text{H}$  NMR (400 MHz,  $\text{CDCl}_3$ ):  $\delta$  8.12 – 8.09 (m, 2H, ArH), 7.73 – 7.70 (m, 3H, ArH), 7.45 – 7.42 (m, 1H, ArH), 7.35 – 7.27 (m, 7H, ArH), 5.26 (t,  $J = 7.8$  Hz, 1H, CH), 5.04 (d,  $J = 8.0$  Hz, 2H,  $\text{CH}_2$ ) ppm.  $^{13}\text{C}$  NMR (100 MHz,  $\text{CDCl}_3$ ):  $\delta$  163.6, 137.9, 137.3, 135.8, 132.4, 132.3, 131.9, 129.6, 129.4, 129.2, 128.2, 127.4, 127.1, 125.5, 124.9, 122.9, 120.6, 78.2, 41.8 ppm. HRMS (ESI):  $m/z$  calcd. for  $\text{C}_{23}\text{H}_{20}^{79}\text{BrN}_2\text{O}_4\text{S}$  [ $\text{M} + \text{NH}_4$ ] $^+$  499.0322, found 499.0328,  $\text{C}_{23}\text{H}_{20}^{81}\text{BrN}_4\text{O}_4\text{S}$  [ $\text{M} + \text{NH}_4$ ] $^+$  501.0302, found 501.0309; calcd. for  $\text{C}_{23}\text{H}_{16}^{79}\text{BrNO}_4\text{SNa}$  [ $\text{M} + \text{Na}$ ] $^+$  503.9876, found 503.9890,  $\text{C}_{23}\text{H}_{16}^{81}\text{BrNO}_4\text{SNa}$  [ $\text{M} + \text{Na}$ ] $^+$  505.9856, found 505.9861.

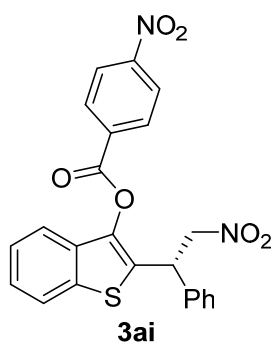

**(S)-2-(2-Nitro-1-phenylethyl)benzo[*b*]thiophen-3-yl 4-nitrobenzoate (3ai).** Colorless oil (26.9 mg, 60% yield). HPLC (Daicel Chiralpak IC, *n*-hexane/2-propanol = 70:30, flow rate 1.0 mL/min, detection at 254 nm):  $t_R = 21.4$  min (major),  $t_R = 28.8$  min (minor); 96% *ee*.  $[\alpha]_D^{25} = +53.8^\circ$  ( $c = 0.64$ ,  $\text{CH}_2\text{Cl}_2$ ).  $^1\text{H}$  NMR (400 MHz,  $\text{CDCl}_3$ ):  $\delta$  8.41 (s, 4H, ArH), 7.76 – 7.74 (m, 1H, ArH), 7.45 – 7.43 (m, 1H, ArH), 7.39 – 7.36 (m, 2H, ArH), 7.34 – 7.28 (m, 5H, ArH), 5.27 (t,  $J = 8.0$  Hz, 1H, CH), 5.10 – 5.01 (m, 2H,  $\text{CH}_2$ ).  $^{13}\text{C}$  NMR (100 MHz,  $\text{CDCl}_3$ )  $\delta$  162.4, 151.2, 137.6, 137.1, 135.8, 133.6, 132.1, 131.6, 129.7, 129.2, 128.4, 127.4, 125.7, 125.1, 124.0, 123.0, 120.5, 78.3, 41.9 ppm. HRMS (ESI):  $m/z$  calcd. for  $\text{C}_{23}\text{H}_{20}\text{N}_3\text{O}_6\text{S}$   $[\text{M} + \text{NH}_4]^+$  466.1068, found 466.1072; calcd. for  $\text{C}_{23}\text{H}_{16}\text{N}_2\text{O}_6\text{SK}$   $[\text{M} + \text{K}]^+$  487.0361, found 487.0358.

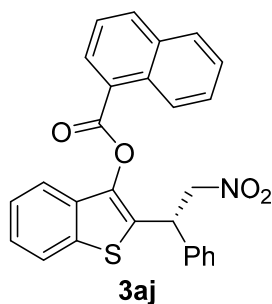

**(S)-2-(2-Nitro-1-phenylethyl)benzo[*b*]thiophen-3-yl 1-naphthoate (3aj).** Colorless oil (29.9 mg, 66% yield). HPLC (Daicel Chiralpak IC, *n*-hexane/2-propanol = 70:30, flow rate 1.0 mL/min, detection at 254 nm):  $t_R = 7.6$  min (major),  $t_R = 9.2$  min (minor); 96% *ee*.  $[\alpha]_D^{25} = +91.8^\circ$  ( $c = 0.52$ ,  $\text{CH}_2\text{Cl}_2$ ).  $^1\text{H}$  NMR (400 MHz,  $\text{CDCl}_3$ ):  $\delta$  9.00 (d,  $J = 8.4$  Hz, 1H, ArH), 8.61 – 8.61 (dd,  $J_1 = 8.8$  Hz,  $J_2 = 0.8$  Hz, 1H, ArH), 8.18 (d,  $J = 8.4$  Hz, 1H, ArH), 7.97 (d,  $J = 8.0$  Hz, 1H, ArH), 7.75 – 7.73 (m, 1H, ArH), 7.69 – 7.58 (m, 3H, ArH), 7.57 – 7.55 (m, 1H, ArH), 7.37 – 7.26 (m, 7H, ArH), 5.36 (t,  $J = 8.0$  Hz, 1H, CH), 5.15 – 5.05 (m, 2H,  $\text{CH}_2$ ) ppm.  $^{13}\text{C}$  NMR (100 MHz,  $\text{CDCl}_3$ ):  $\delta$  164.6, 138.3, 137.4, 135.9, 135.1, 134.0, 132.7, 131.84, 131.78, 129.4, 129.2, 128.8, 128.6, 128.2, 127.5, 126.7, 125.7, 125.4, 124.9, 124.6, 124.4, 122.9, 120.8, 78.2, 41.9 ppm. HRMS (ESI):  $m/z$  calcd. for  $\text{C}_{27}\text{H}_{23}\text{N}_2\text{O}_4\text{S}$   $[\text{M} + \text{NH}_4]^+$  471.1374, found 471.1370; calcd. for  $\text{C}_{27}\text{H}_{19}\text{NO}_4\text{SK}$   $[\text{M} + \text{K}]^+$  492.0666, found 492.0664.

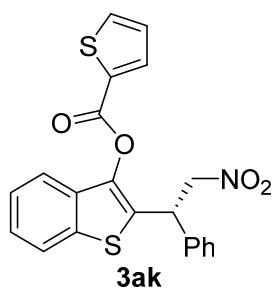

**(S)-2-(2-nitro-1-phenylethyl)benzo[b]thiophen-3-yl thiophene-2-carboxylate (3ak).** White solid (40.0 mg, 97% yield), mp 112-113 °C. HPLC (Daicel Chiralpak IC, *n*-hexane/2-propanol = 70:30, flow rate 1.0 mL/min, detection at 254 nm):  $t_R$  = 8.4 min (major),  $t_R$  = 10.4 min (minor); 91% *ee*.  $[\alpha]_D^{25} = +55.8^\circ$  ( $c = 1.55$ , CH<sub>2</sub>Cl<sub>2</sub>). <sup>1</sup>H NMR (400 MHz, CDCl<sub>3</sub>): 8.07 (dd,  $J_1 = 3.8$  Hz,  $J_2 = 1.4$  Hz, 1H, ArH), 7.74 (dd,  $J_1 = 4.8$  Hz,  $J_2 = 1.2$  Hz, 1H, ArH), 7.71 – 7.69 (m, 1H, ArH), 7.52 – 7.50 (m, 1H, ArH), 7.37 – 7.27 (m, 7H, ArH), 7.25 – 7.23 (m, 1H, ArH), 5.29 (t,  $J = 8.0$  Hz, 1H, CH), 5.07 (d,  $J = 8.0$  Hz, 1H, CH<sub>2</sub>). <sup>13</sup>C NMR (100 MHz, CDCl<sub>3</sub>):  $\delta$  159.6, 137.6, 137.3, 135.7, 135.6, 134.5, 132.5, 131.2, 129.6, 129.1, 128.4, 128.2, 127.4, 125.4, 124.9, 122.8, 120.8, 78.0, 41.8 ppm. HRMS (ESI):  $m/z$  calcd. for C<sub>21</sub>H<sub>19</sub>N<sub>2</sub>O<sub>4</sub>S<sub>2</sub> [M + NH<sub>4</sub>]<sup>+</sup> 427.0781, found 427.0784; calcd. for C<sub>21</sub>H<sub>15</sub>NO<sub>4</sub>S<sub>2</sub>Na [M + Na]<sup>+</sup> 432.0335, found 432.0334.

### 3. Enantioselective synthesis and characterization of compounds 5

Unsaturated  $\alpha$ -nitroketones **2** (0.10 mmol), benzothiophene **4** (0.12 mmol), and catalyst **C6** (5 mmol%) were dissolved in CH<sub>2</sub>Cl<sub>2</sub> (1.0 mL), and the mixture was stirred at -10°C for 120 h. After completion of the reaction, the residue was purified by flash column chromatography on silica gel (petroleum ether/ethyl acetate = 10:1 to 8:1) to afford the pure products **5**. Racemates were prepared following a similar procedure with Et<sub>3</sub>N (5 mol %) as achiral catalyst.

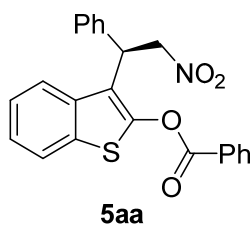

**(R)-3-(2-Nitro-1-phenylethyl)benzo[b]thiophen-2-yl benzoate (5aa).** Colorless oil (38.7 mg, 96% yield). HPLC (Daicel Chiralpak IC, *n*-hexane/2-propanol = 70:30, flow rate 1.0 mL/min, detection at 254 nm):  $t_R$  = 12.6 min (minor),  $t_R$  = 14.4 min (major); 90% *ee*.  $[\alpha]_D^{25} = -3.1^\circ$  ( $c = 1.15$ , CH<sub>2</sub>Cl<sub>2</sub>). <sup>1</sup>H NMR (400 MHz, CDCl<sub>3</sub>):  $\delta$  8.13 (dd,  $J_1 = 8.4$  Hz,  $J_2 = 8.4$  Hz, 1.2 Hz, 2H, ArH), 7.78 – 7.75 (m, 1H, ArH), 7.71 – 7.66 (m, 1H, ArH), 7.59 – 7.52 (m, 3H, ArH), 7.34 – 7.27 (m, 6H, ArH), 7.25 – 7.21 (m, 1H, ArH), 5.52 (t,  $J = 7.8$  Hz, 1H, CH), 5.28 (dd,  $J_1 = 13.0$  Hz,  $J_2 = 7.8$  Hz, 1H, CH<sub>2</sub>), 5.16 (dd,  $J = 12.8$  Hz,  $J_2 = 7.6$  Hz, 1H, CH<sub>2</sub>) ppm. <sup>13</sup>C NMR (100 MHz, CDCl<sub>3</sub>):  $\delta$  163.4, 148.8, 137.5, 135.0, 134.7, 134.6, 130.4, 129.1, 129.0, 127.8, 127.7, 127.2, 124.9, 124.7, 122.6, 121.6, 118.5, 77.3, 40.7 ppm. HRMS (ESI):  $m/z$  calcd. for

C<sub>23</sub>H<sub>21</sub>N<sub>2</sub>O<sub>4</sub>S [M + NH<sub>4</sub>]<sup>+</sup> 421.1217, found 421.1208.

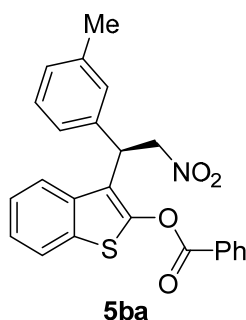

**(R)-3-(2-Nitro-1-(m-tolyl)ethyl)benzo[b]thiophen-2-yl benzoate (5ba).** Colorless oil (37.5 mg, 90% yield). HPLC (Daicel Chiralpak IC, *n*-hexane/2-propanol = 70:30, flow rate 1.0 mL/min, detection at 254 nm): *t*<sub>R</sub> = 12.6 min (minor), *t*<sub>R</sub> = 13.4 min (major); 94% *ee*. [ $\alpha$ ]<sub>D</sub><sup>25</sup> = -5.6° (*c* = 1.70, CH<sub>2</sub>Cl<sub>2</sub>). <sup>1</sup>H NMR (400 MHz, CDCl<sub>3</sub>):  $\delta$  8.13 – 8.11 (m, 2H, ArH), 7.76 – 7.74 (m, 1H, ArH), 7.70 – 7.65 (m, 1H, ArH), 7.62 – 7.60 (m, 1H, ArH), 7.53 (t, *J* = 7.8 Hz, 2H, ArH), 7.34 – 7.32 (m, 2H, ArH), 7.18 – 7.10 (m, 3H, ArH), 7.02 (d, *J* = 7.2 Hz, 1H, ArH), 5.48 (t, *J* = 7.8 Hz, 1H, CH), 5.26 (dd, *J*<sub>1</sub> = 13.2 Hz, *J*<sub>2</sub> = 8.0 Hz, 1H, CH<sub>2</sub>), 5.13 (dd, *J*<sub>1</sub> = 13.2 Hz, *J*<sub>2</sub> = 7.6 Hz, 1H, CH<sub>2</sub>), 2.22 (s, 3H, CH<sub>3</sub>) ppm. <sup>13</sup>C NMR (100 MHz, CDCl<sub>3</sub>):  $\delta$  163.3, 148.6, 138.8, 137.3, 134.9, 134.7, 134.5, 130.3, 128.9, 128.4, 127.8, 127.7, 124.8, 124.6, 124.2, 122.5, 121.5, 118.6, 77.3, 40.6, 21.4 ppm. HRMS (ESI): *m/z* calcd. for C<sub>24</sub>H<sub>23</sub>N<sub>2</sub>O<sub>4</sub>S [M + NH<sub>4</sub>]<sup>+</sup> 435.1374, found 435.1376; calcd. for C<sub>24</sub>H<sub>19</sub>NO<sub>4</sub>SNa [M + Na]<sup>+</sup> 440.0927, found 440.0925.

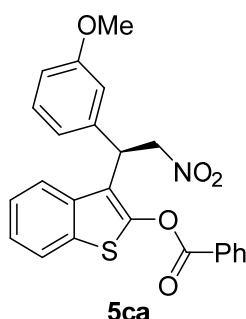

**(R)-3-(1-(3-Methoxyphenyl)-2-nitroethyl)benzo[b]thiophen-2-yl benzoate (5ca).** Colorless oil (37.7 mg, 87% yield). HPLC (Daicel Chiralpak IC, *n*-hexane/2-propanol = 70:30, flow rate 1.0 mL/min, detection at 254 nm): *t*<sub>R</sub> = 18.0 min (minor), *t*<sub>R</sub> = 20.9 min (major); 81% *ee*. [ $\alpha$ ]<sub>D</sub><sup>25</sup> = +6.5° (*c* = 1.65, CH<sub>2</sub>Cl<sub>2</sub>). <sup>1</sup>H NMR (400 MHz, CDCl<sub>3</sub>):  $\delta$  8.15 – 8.13 (m, 2H, ArH), 7.76 – 7.73 (m, 1H, ArH), 7.68 (t, *J* = 7.6 Hz, 1H, ArH), 7.58 – 7.52 (m, 3H, ArH), 7.34 – 7.30 (m, 2H, ArH), 7.23 (d, *J* = 8.4 Hz, 2H, ArH), 6.82 – 6.78 (m, 2H, ArH), 5.45 (t, *J* = 7.8 Hz, 1H, CH), 5.23 (dd, *J*<sub>1</sub> = 12.8 Hz, *J*<sub>2</sub> = 8.0 Hz, 1H, CH<sub>2</sub>) 5.13 (dd, *J*<sub>1</sub> = 12.8 Hz, *J*<sub>2</sub> = 7.6 Hz, 1H, CH<sub>2</sub>) 3.72 (s, 3H, CH<sub>3</sub>) ppm. <sup>13</sup>C NMR (100 MHz, CDCl<sub>3</sub>):  $\delta$  163.4, 158.9, 148.5, 134.9, 134.7, 134.5, 130.3, 129.3, 128.9, 128.3, 127.7, 124.8, 124.6, 122.5, 121.6, 118.8, 114.4, 77.6, 55.2, 40.2 ppm. HRMS (ESI): *m/z* calcd. for C<sub>24</sub>H<sub>23</sub>N<sub>2</sub>O<sub>5</sub>S [M + NH<sub>4</sub>]<sup>+</sup> 451.1323, found 451.1332;

C<sub>24</sub>H<sub>19</sub>NO<sub>5</sub>SNa [M + Na]<sup>+</sup> 456.0876, found 456.0885.

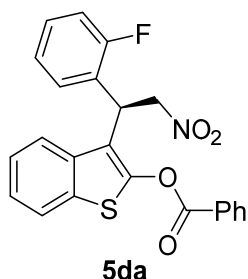

**(R)-3-(1-(2-Fluorophenyl)-2-nitroethyl)benzo[b]thiophen-2-yl benzoate (5da).** Colorless oil (28.6 mg, 68% yield). HPLC (Daicel Chiralpak IC, *n*-hexane/2-propanol = 70:30, flow rate 1.0 mL/min, detection at 254 nm): *t<sub>R</sub>* = 10.4 min (minor), *t<sub>R</sub>* = 14.8 min (major); 82% *ee*. [ $\alpha$ ]<sub>D</sub><sup>25</sup> = +3.5° (*c* = 1.31, CH<sub>2</sub>Cl<sub>2</sub>). <sup>1</sup>H NMR (400 MHz, CDCl<sub>3</sub>):  $\delta$  8.14 – 8.08 (m, 4H, ArH), 7.81 – 7.78 (m, 1H, ArH), 7.713 – 7.70 (m, 1H, ArH), 7.57 – 7.49 (m, 5H, ArH), 7.38 – 7.36 (m, 2H, ArH), 5.59 (dd, *J*<sub>1</sub> = 8.4 Hz, *J*<sub>2</sub> = 6.8 Hz, 1H, CH), 5.34 (dd, *J*<sub>1</sub> = 13.4 Hz, *J*<sub>2</sub> = 8.6 Hz, 1H, CH<sub>2</sub>), 5.14 (dd, *J* = 13.4 Hz, 6.8 Hz, 1H, CH<sub>2</sub>) ppm. <sup>13</sup>C NMR (100 MHz, CDCl<sub>3</sub>):  $\delta$  163.3, 160.6 (d, <sup>1</sup>*J*<sub>C-F</sub> = 245.8 Hz), 149.0, 134.7 (d, <sup>2</sup>*J*<sub>C-F</sub> = 20.8 Hz), 134.5, 130.3, 129.6 (d, <sup>3</sup>*J*<sub>C-F</sub> = 8.5 Hz), 129.0, 128.6 (d, <sup>4</sup>*J*<sub>C-F</sub> = 3.5 Hz), 127.7, 124.9, 124.7, 124.6 (d, <sup>4</sup>*J*<sub>C-F</sub> = 3.6 Hz), 124.2 (d, <sup>3</sup>*J*<sub>C-F</sub> = 13.7 Hz), 122.5, 121.3, 117.0, 116.1 (d, <sup>2</sup>*J*<sub>C-F</sub> = 21.9 Hz), 75.9 (d, <sup>4</sup>*J*<sub>C-F</sub> = 1.7 Hz), 35.3 (d, <sup>3</sup>*J*<sub>C-F</sub> = 2.7 Hz) ppm. HRMS (ESI): *m/z* calcd. for C<sub>23</sub>H<sub>20</sub>FN<sub>2</sub>O<sub>4</sub>S [M + NH<sub>4</sub>]<sup>+</sup> 439.1123, found 439.1122; calcd. for C<sub>23</sub>H<sub>16</sub>FNO<sub>4</sub>SNa [M + Na]<sup>+</sup> 444.0677, found 444.0674.

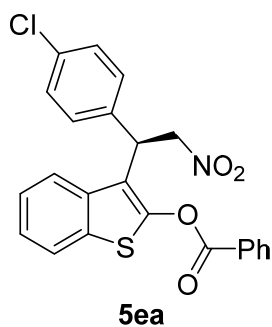

**(R)-3-(1-(4-Chlorophenyl)-2-nitroethyl)benzo[b]thiophen-2-yl benzoate (5ea).** Colorless oil (35.8 mg, 82% yield). HPLC (Daicel Chiralpak IC, *n*-hexane/2-propanol = 70:30, flow rate 1.0 mL/min, detection at 254 nm): *t<sub>R</sub>* = 13.2 min (minor), *t<sub>R</sub>* = 16.3 min (major); 98% *ee*. [ $\alpha$ ]<sub>D</sub><sup>25</sup> = -2.9° (*c* = 1.79, CH<sub>2</sub>Cl<sub>2</sub>). <sup>1</sup>H NMR (400 MHz, CDCl<sub>3</sub>):  $\delta$  8.12 – 8.10 (m, 2H, ArH), 7.77 – 7.75 (m, 1H, ArH), 7.70 (t, *J* = 7.6 Hz, 1H, ArH), 7.57 – 7.53 (m, 3H, ArH), 7.35 – 7.33 (m, 2H, ArH), 7.25 (s, 4H, ArH), 5.47 (t, *J* = 7.8 Hz, 1H, CH), 5.25 (dd, *J*<sub>1</sub> = 13.2 Hz, *J*<sub>2</sub> = 8.4 Hz, 1H, CH<sub>2</sub>), 5.12 (dd, *J*<sub>1</sub> = 13.2 Hz, *J*<sub>2</sub> = 7.2 Hz, 1H, CH<sub>2</sub>) ppm. <sup>13</sup>C NMR (100 MHz, CDCl<sub>3</sub>):  $\delta$  163.3, 149.0, 135.9, 134.9, 134.6, 134.4, 133.6, 130.3, 129.2, 129.0, 128.6, 127.5, 124.9, 124.8, 122.6, 121.4, 118.1, 77.1, 40.2 ppm. HRMS (ESI): *m/z* calcd. for C<sub>23</sub>H<sub>16</sub>ClNO<sub>4</sub>SK [M + K]<sup>+</sup> 476.0120, found 476.0127.



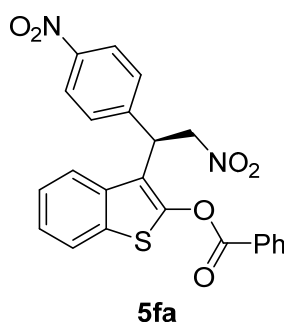

**(R)-3-(2-Nitro-1-(4-nitrophenyl)ethyl)benzo[*b*]thiophen-2-yl benzoate (5fa).** Colorless oil (20.2 mg, 45% yield). HPLC (Daicel Chiralpak AD-H, *n*-hexane/2-propanol = 70:30, flow rate 1.0 mL/min, detection at 254 nm):  $t_R = 13.1$  min (minor),  $t_R = 15.7$  min (major); 93% *ee*.  $[\alpha]_D^{25} = -13.1^\circ$  ( $c = 0.31$ ,  $\text{CH}_2\text{Cl}_2$ ).  $^1\text{H NMR}$  (400 MHz,  $\text{CDCl}_3$ ):  $\delta$  8.18 – 8.16 (m, 2H, ArH), 7.76 – 7.67 (m, 3H, ArH), 7.55 (t,  $J = 7.8$  Hz, 2H, ArH), 7.38 – 7.32 (m, 3H, ArH), 7.23 – 7.19 (m, 1H, ArH), 7.07 – 6.99 (m, 2H, ArH), 5.74 (t,  $J = 8.0$  Hz, 1H, CH), 5.29 – 5.19 (m, 2H,  $\text{CH}_2$ ) ppm.  $^{13}\text{C NMR}$  (100 MHz,  $\text{CDCl}_3$ ):  $\delta$  163.3, 149.6, 147.3, 144.8, 135.0, 134.9, 134.1, 130.3, 129.1, 128.2, 127.3, 125.2, 125.1, 124.2, 122.8, 121.0, 117.5, 76.5, 40.4 ppm. HRMS (ESI):  $m/z$  calcd. for  $\text{C}_{23}\text{H}_{20}\text{N}_3\text{O}_6\text{S}$   $[\text{M} + \text{NH}_4]^+$  466.1067, found 466.1075.

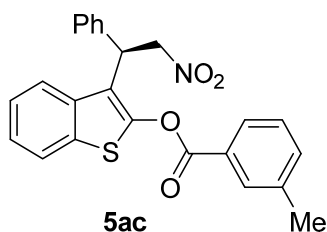

**(R)-3-(2-Nitro-1-phenylethyl)benzo[*b*]thiophen-2-yl 3-methylbenzoate (5ac).** Colorless oil (36.7 mg, 88% yield). HPLC (Daicel Chiralpak IC, *n*-hexane/2-propanol = 70:30, flow rate 1.0 mL/min, detection at 254 nm):  $t_R = 14.3$  min (minor),  $t_R = 15.6$  min (major); 91% *ee*.  $[\alpha]_D^{25} = -13.0^\circ$  ( $c = 0.95$ ,  $\text{CH}_2\text{Cl}_2$ ).  $^1\text{H NMR}$  (400 MHz,  $\text{CDCl}_3$ ):  $\delta$  7.94 – 7.92 (m, 2H, ArH), 7.78 – 7.73 (m, 1H, ArH), 7.59 – 7.55 (m, 1H, ArH), 7.48 (d,  $J = 7.6$  Hz, 1H, ArH), 7.42 (t,  $J = 7.8$  Hz, 1H, ArH), 7.34 – 7.21 (m, 7H, ArH), 5.52 (t,  $J = 7.8$  Hz, 1H, CH), 5.28 (dd,  $J_1 = 12.8$  Hz,  $J_2 = 8.0$  Hz, 1H,  $\text{CH}_2$ ), 5.15 (dd,  $J_1 = 13.0$  Hz,  $J_2 = 7.4$  Hz, 1H,  $\text{CH}_2$ ), 2.45 (s, 3H,  $\text{CH}_3$ ) ppm.  $^{13}\text{C NMR}$  (176 MHz,  $\text{CDCl}_3$ ):  $\delta$  163.5, 148.8, 138.9, 137.5, 135.3, 135.0, 134.7, 130.9, 129.1, 128.8, 127.6, 127.5, 127.2, 124.8, 124.6, 122.5, 121.5, 118.4, 77.4, 40.7, 21.3 ppm. HRMS (ESI):  $m/z$  calcd. for  $\text{C}_{24}\text{H}_{23}\text{N}_2\text{O}_4\text{S}$   $[\text{M} + \text{NH}_4]^+$  435.1374, found 435.1373; calcd. for  $\text{C}_{24}\text{H}_{19}\text{NO}_4\text{SNa}$   $[\text{M} + \text{Na}]^+$  440.0927, found 440.0925.

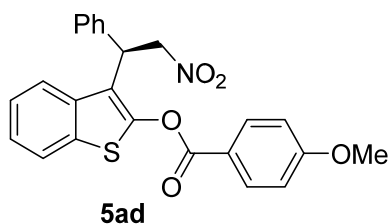

**(R)-3-(2-Nitro-1-phenylethyl)benzo[b]thiophen-2-yl 4-methoxybenzoate (5ad).** Colorless oil (39.9 mg, 90% yield). HPLC (Daicel Chiralpak IC, *n*-hexane/2-propanol = 70:30, flow rate 1.0 mL/min, detection at 254 nm):  $t_R = 19.9$  min (minor),  $t_R = 22.0$  min (major); 95% *ee*.  $[\alpha]_D^{25} = -2.4^\circ$  ( $c = 2.71$ ,  $\text{CH}_2\text{Cl}_2$ ).  $^1\text{H NMR}$  (400 MHz,  $\text{CDCl}_3$ ):  $\delta$  8.11 – 8.08 (m, 1H, ArH), 7.78 – 7.74 (m, 1H, ArH), 7.58 – 7.54 (m, 1H, ArH), 7.34 – 7.28 (m, 6H, ArH), 7.25 – 7.22 (m, 1H, ArH), 7.03 – 6.99 (m, 1H, ArH), 5.51 (t,  $J = 7.8$  Hz, 1H, CH), 5.28 (dd,  $J_1 = 13.0$  Hz,  $J_2 = 8.2$  Hz, 1H,  $\text{CH}_2$ ), 5.16 (dd,  $J_1 = 13.2$  Hz,  $J_2 = 7.6$  Hz, 1H,  $\text{CH}_2$ ), 3.91 (s, 3H,  $\text{CH}_3$ ) ppm.  $^{13}\text{C NMR}$  (176 MHz,  $\text{CDCl}_3$ ):  $\delta$  164.6, 163.0, 148.9, 137.6, 135.0, 134.7, 132.6, 129.1, 127.6, 127.2, 124.7, 124.5, 122.5, 121.5, 119.8, 118.2, 114.3, 77.5, 55.6, 40.8 ppm. HRMS (ESI):  $m/z$  calcd. for  $\text{C}_{24}\text{H}_{23}\text{N}_2\text{O}_5\text{S}$   $[\text{M} + \text{NH}_4]^+$  451.1323, found 451.1313;  $\text{C}_{24}\text{H}_{19}\text{NO}_5\text{SNa}$   $[\text{M} + \text{Na}]^+$  456.0876, found 456.0867.

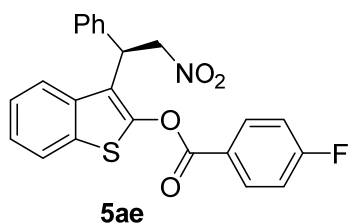

**(R)-3-(2-Nitro-1-phenylethyl)benzo[b]thiophen-2-yl 4-fluorobenzoate (5ae).** Colorless oil (39.2 mg, 93% yield). HPLC (Daicel Chiralpak IC, *n*-hexane/2-propanol = 70:30, flow rate 1.0 mL/min, detection at 254 nm):  $t_R = 12.7$  min (minor),  $t_R = 14.9$  min (major); 90% *ee*.  $[\alpha]_D^{25} = -16.2^\circ$  ( $c = 2.02$ ,  $\text{CH}_2\text{Cl}_2$ ).  $^1\text{H NMR}$  (400 MHz,  $\text{CDCl}_3$ ):  $\delta$  8.15 – 8.12 (m, 2H, ArH), 7.76 – 7.74 (m, 1H, ArH), 7.57 – 7.55 (m, 1H, ArH), 7.35 – 7.26 (m, 6H, ArH), 7.24 – 7.18 (m, 3H, ArH), 5.52 (t,  $J = 8.0$  Hz, 1H, CH) 5.26 (dd,  $J_1 = 13.0$  Hz,  $J_2 = 7.6$  Hz, 1H,  $\text{CH}_2$ ), 5.13 (dd,  $J_1 = 13.2$  Hz,  $J_2 = 8.0$  Hz, 1H,  $\text{CH}_2$ ) ppm.  $^{13}\text{C NMR}$  (176 MHz,  $\text{CDCl}_3$ ):  $\delta$  166.6 (d,  $^1J_{\text{C-F}} = 257.0$  Hz), 162.4, 148.6, 137.3, 134.9, 134.5, 133.1 (d,  $^3J_{\text{C-F}} = 10.6$  Hz), 129.1, 127.6, 127.1, 124.8, 124.7, 124.0, 123.9 (d,  $^4J_{\text{C-F}} = 2.6$  Hz), 122.5, 121.6, 118.6, 116.3 (d,  $^2J_{\text{C-F}} = 22.2$  Hz), 77.2, 40.6 ppm. HRMS (ESI):  $m/z$  calcd. for  $\text{C}_{23}\text{H}_{20}\text{FN}_2\text{O}_4\text{S}$   $[\text{M} + \text{NH}_4]^+$  439.1123, found 439.1119; calcd. for  $\text{C}_{23}\text{H}_{16}\text{FNO}_4\text{SNa}$   $[\text{M} + \text{Na}]^+$  444.0677, found 444.0673.

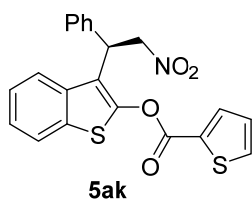

**(R)-3-(2-Nitro-1-phenylethyl)benzo[b]thiophen-2-yl thiophene-2-carboxylate (5ak).**

Colorless oil (29.5 mg, 72% yield). HPLC (Daicel Chiralpak IC, *n*-hexane/2-propanol = 70:30, flow rate 1.0 mL/min, detection at 254 nm):  $t_R = 17.6$  min (major),  $t_R = 19.9$  min (minor); 89% *ee*.  $[\alpha]_D^{25} = -1.6^\circ$  ( $c = 1.61$ ,  $\text{CH}_2\text{Cl}_2$ ).  $^1\text{H}$  NMR (400 MHz,  $\text{CDCl}_3$ ):  $\delta$  8.01 – 8.00 (m, 1H, ArH), 7.75 – 7.73 (m, 2H, ArH), 7.62 – 7.60 (m, 1H, ArH), 7.36 – 7.26 (m, 6H, ArH), 7.24 – 7.20 (m, 2H, ArH), 5.47 (t,  $J = 8.0$  Hz, 1H, CH), 5.32 (dd,  $J_1 = 13.0$  Hz,  $J_2 = 8.2$  Hz, 1H,  $\text{CH}_2$ ), 5.20 (dd,  $J_1 = 12.8$  Hz,  $J_2 = 7.6$  Hz, 1H,  $\text{CH}_2$ ) ppm.  $^{13}\text{C}$  NMR (176 MHz,  $\text{CDCl}_3$ ):  $\delta$  158.4, 148.1, 137.6, 136.1, 135.0, 134.9, 134.5, 130.5, 129.1, 128.6, 127.7, 127.3, 124.8, 124.7, 122.4, 121.5, 118.2, 77.5, 41.0 ppm. HRMS (ESI):  $m/z$  calcd. for  $\text{C}_{21}\text{H}_{19}\text{N}_2\text{O}_4\text{S}_2$   $[\text{M} + \text{NH}_4]^+$  427.0781, found 427.0778; calcd. for  $\text{C}_{21}\text{H}_{15}\text{NO}_4\text{S}_2\text{Na}$   $[\text{M} + \text{Na}]^+$  432.0335, found 432.0331.

**4. Enantioselective synthesis and characterization of compound 6**

The compound **3aa** (40.3 mg, 0.1 mmol) was dissolved in  $\text{CHCl}_3$  (1.0 mL) and  $\text{HCO}_2\text{H}$  (1.0 mL),  $\text{H}_2\text{O}_2$  (35% aq, 0.5 mL) was added dropwise and the mixture was stirred at room temperature for 12 h. After completion of the reaction, the residue was purified by flash column chromatography on silica gel (petroleum ether/ethyl acetate = 3:1 to 1:1) to afford the pure product **6**.

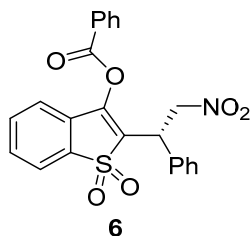

**(S)-2-(2-Nitro-1-phenylethyl)-1,1-dioxobenzob[thiophen-3-yl benzoate (6).** Colorless oil (35.3 mg, 81% yield). HPLC (Daicel Chiralpak IC, *n*-hexane/2-propanol = 70:30, flow rate 1.0 mL/min, detection at 254 nm):  $t_R = 23.7$  min (major),  $t_R = 27.1$  min (minor); 96% *ee*.  $[\alpha]_D^{25} = -5.9^\circ$  ( $c = 3.66$ ,  $\text{CH}_2\text{Cl}_2$ ).  $^1\text{H}$  NMR (400 MHz,  $\text{CDCl}_3$ ):  $\delta$  8.02 – 8.00 (m, 2H, ArH), 7.77 – 7.75 (m, 1H, ArH), 7.72 (t,  $J = 7.4$  Hz, 1H, ArH), 7.58 – 7.52 (m, 4H, ArH), 7.35 – 7.33 (m, 2H, ArH), 7.24 – 7.17 (m, 4H, ArH), 5.28 (dd,  $J_1 = 13.8$  Hz,  $J_2 = 6.2$  Hz, 1H, CH), 5.18 (dd,  $J_1 = 13.6$  Hz,  $J_2 = 9.6$  Hz, 1H,  $\text{CH}_2$ ), 5.05 (dd,  $J_1 = 9.4$  Hz,  $J_2 = 6.2$  Hz, 1H,  $\text{CH}_2$ ) ppm.  $^{13}\text{C}$  NMR (176 MHz,  $\text{CDCl}_3$ ):  $\delta$  162.3, 148.9, 136.9, 135.0, 134.1, 133.5, 131.0, 130.6, 129.1, 129.0, 128.5, 128.4, 128.2, 127.8, 126.7, 121.4, 121.3, 74.8, 39.2 ppm. HRMS (ESI):  $m/z$  calcd. for  $\text{C}_{23}\text{H}_{21}\text{N}_2\text{O}_6\text{S}$   $[\text{M} + \text{NH}_4]^+$  453.1115, found 453.1115.

## 5. Crystal data and structure refinement for 3ka

Table S1. Crystal data and structure refinement for **3ka** (CCDC 2120491)

|                                             |                                                                 |
|---------------------------------------------|-----------------------------------------------------------------|
| Identification code                         | mo_210929_NC_1784_0m                                            |
| Empirical formula                           | C <sub>23</sub> H <sub>16</sub> N <sub>2</sub> O <sub>6</sub> S |
| Formula weight                              | 448.44                                                          |
| Temperature/K                               | 170.0                                                           |
| Crystal system                              | monoclinic                                                      |
| Space group                                 | P2 <sub>1</sub>                                                 |
| a/Å                                         | 14.8028(7)                                                      |
| b/Å                                         | 8.2847(3)                                                       |
| c/Å                                         | 17.6240(7)                                                      |
| α/°                                         | 90                                                              |
| β/°                                         | 108.031(2)                                                      |
| γ/°                                         | 90                                                              |
| Volume/Å <sup>3</sup>                       | 2055.20(15)                                                     |
| Z                                           | 4                                                               |
| ρ <sub>calc</sub> /cm <sup>3</sup>          | 1.449                                                           |
| μ/mm <sup>-1</sup>                          | 0.203                                                           |
| F(000)                                      | 928.0                                                           |
| Crystal size/mm <sup>3</sup>                | 0.49 × 0.2 × 0.16                                               |
| Radiation                                   | MoKα (λ = 0.71073)                                              |
| 2θ range for data collection/°              | 4.316 to 54.296                                                 |
| Index ranges                                | -18 ≤ h ≤ 18, -10 ≤ k ≤ 10, -22 ≤ l ≤ 22                        |
| Reflections collected                       | 40374                                                           |
| Independent reflections                     | 9048 [R <sub>int</sub> = 0.0388, R <sub>sigma</sub> = 0.0318]   |
| Data/restraints/parameters                  | 9048/1/577                                                      |
| Goodness-of-fit on F <sup>2</sup>           | 1.025                                                           |
| Final R indexes [I ≥ 2σ (I)]                | R <sub>1</sub> = 0.0357, wR <sub>2</sub> = 0.0885               |
| Final R indexes [all data]                  | R <sub>1</sub> = 0.0416, wR <sub>2</sub> = 0.0929               |
| Largest diff. peak/hole / e Å <sup>-3</sup> | 0.30/-0.22                                                      |
| Flack parameter                             | -0.01(2)                                                        |

## 6. Copies of $^1\text{H}$ and $^{13}\text{C}$ NMR spectra of new compounds

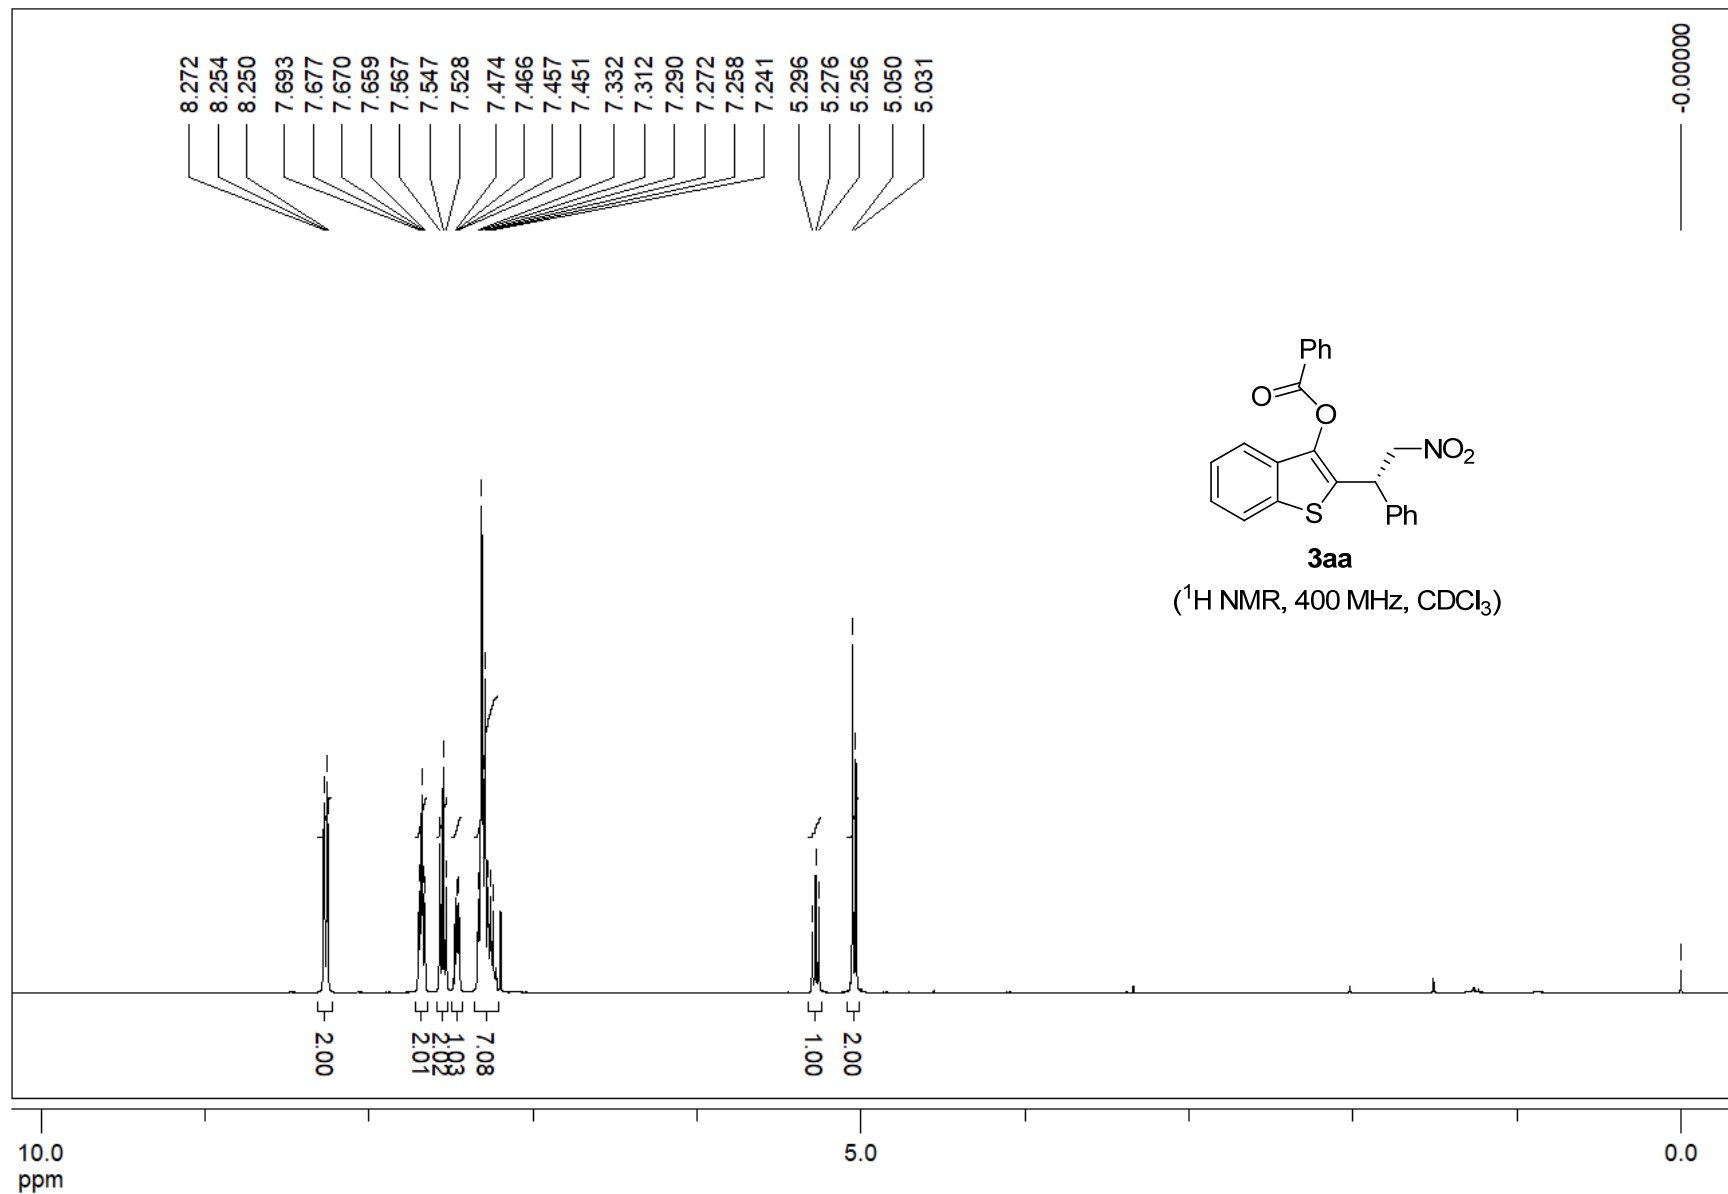

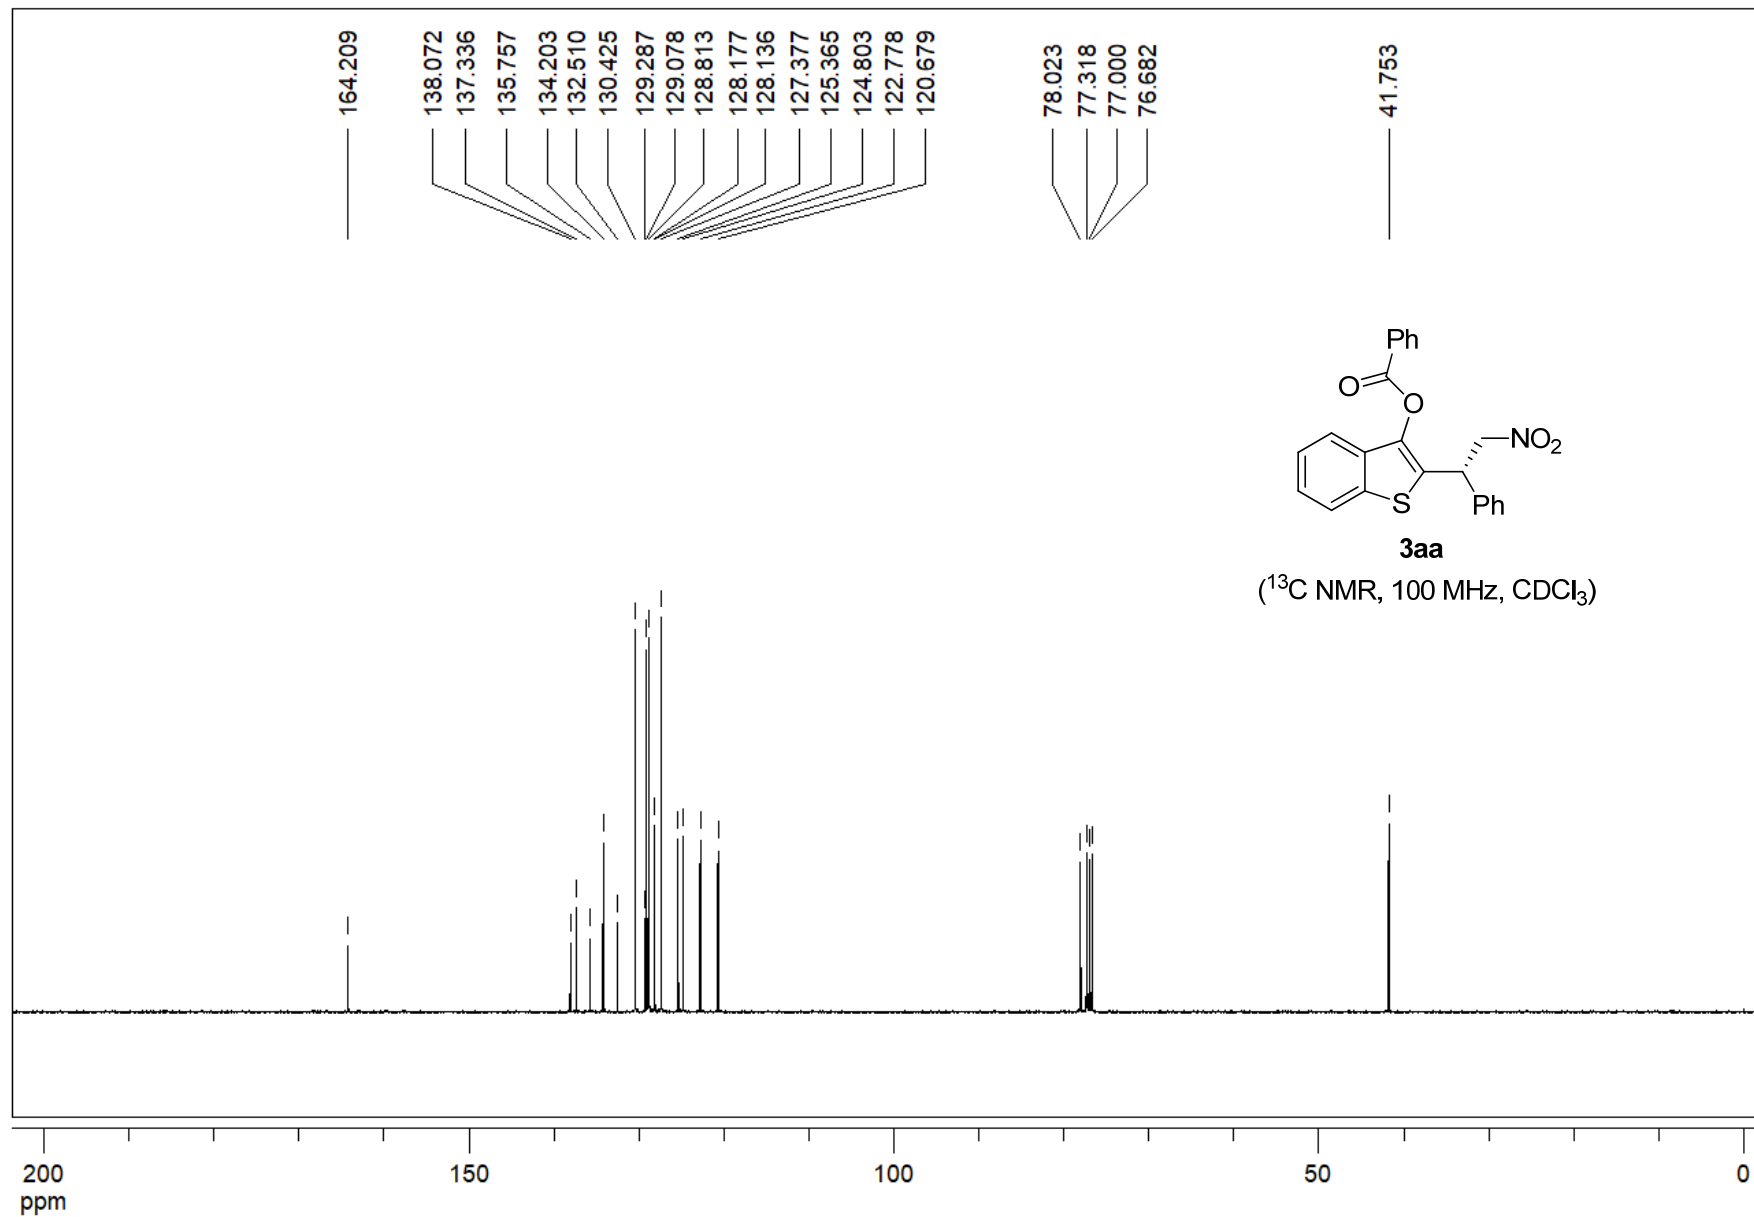

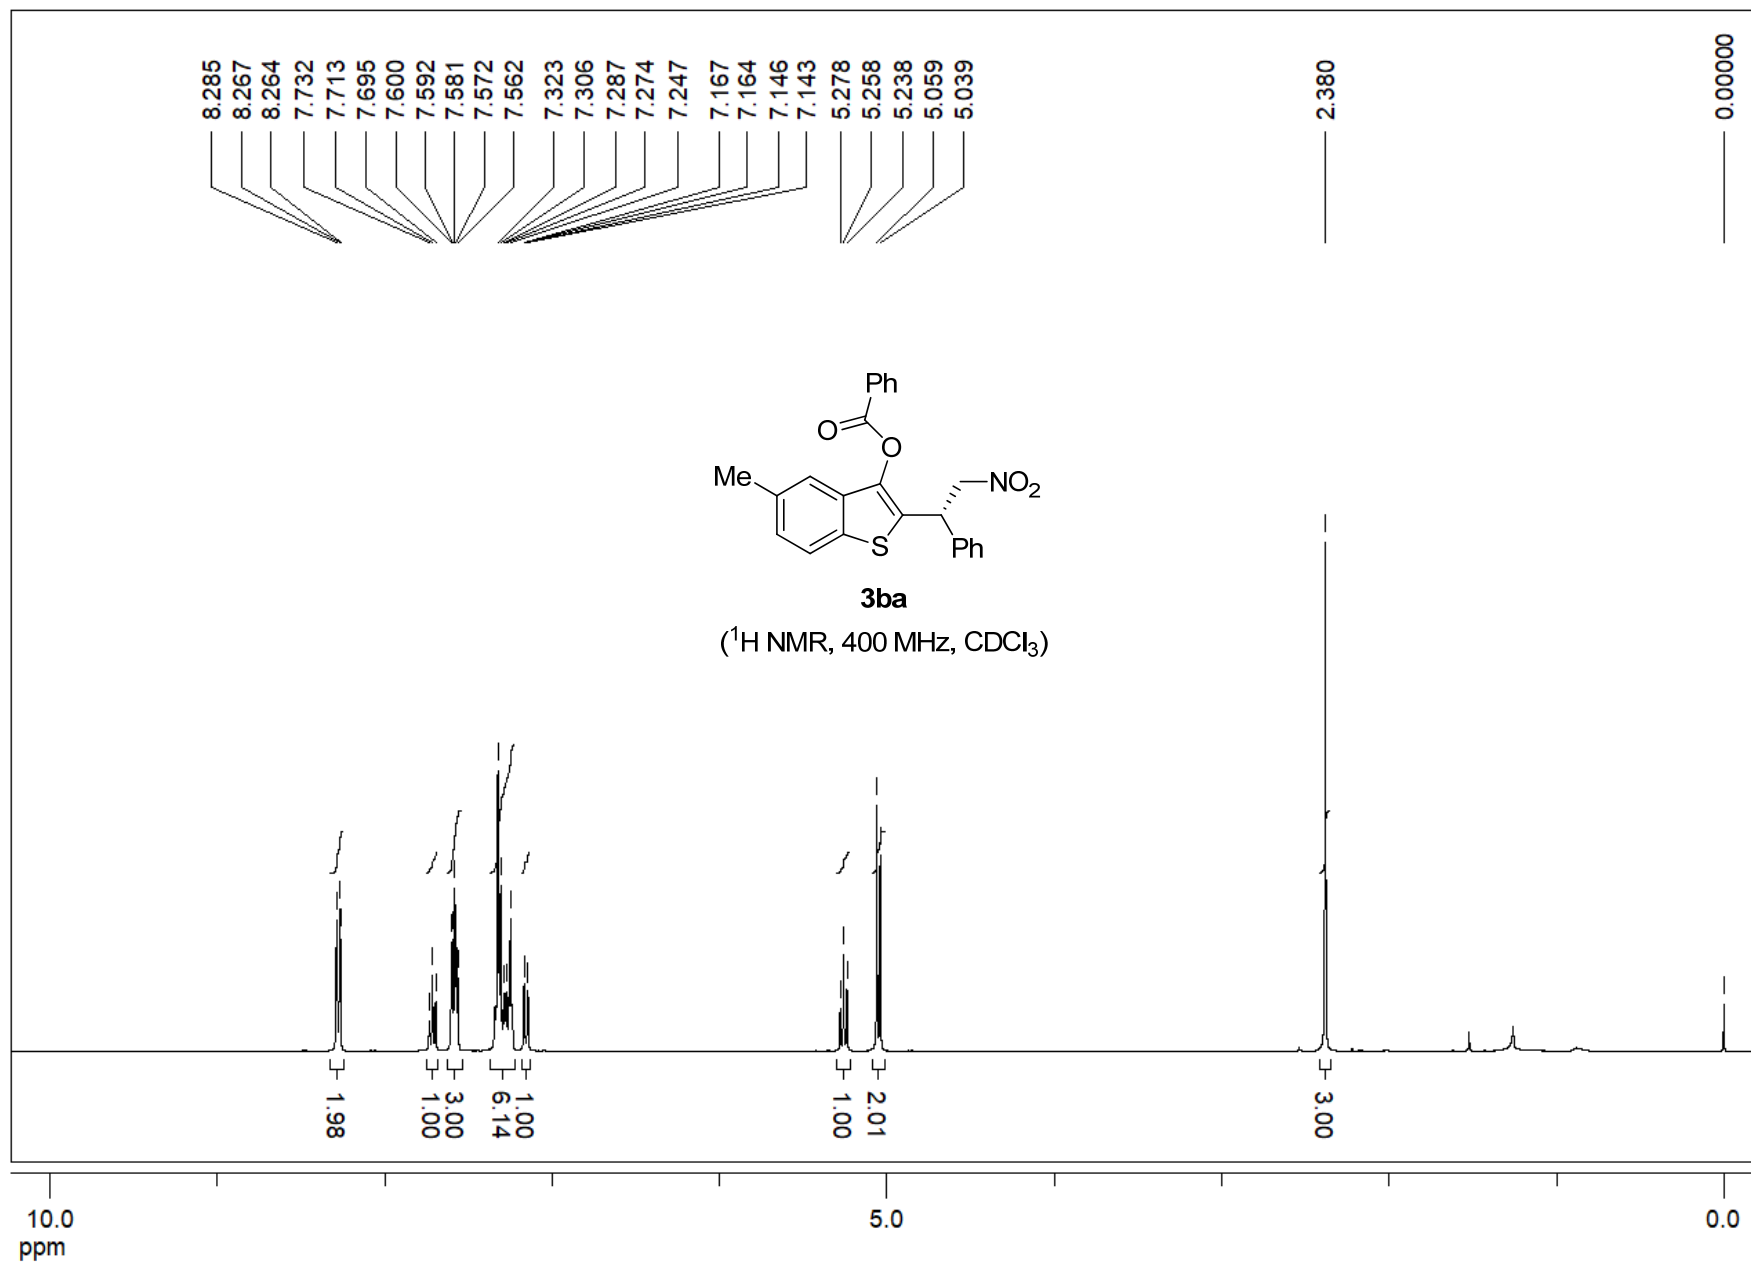

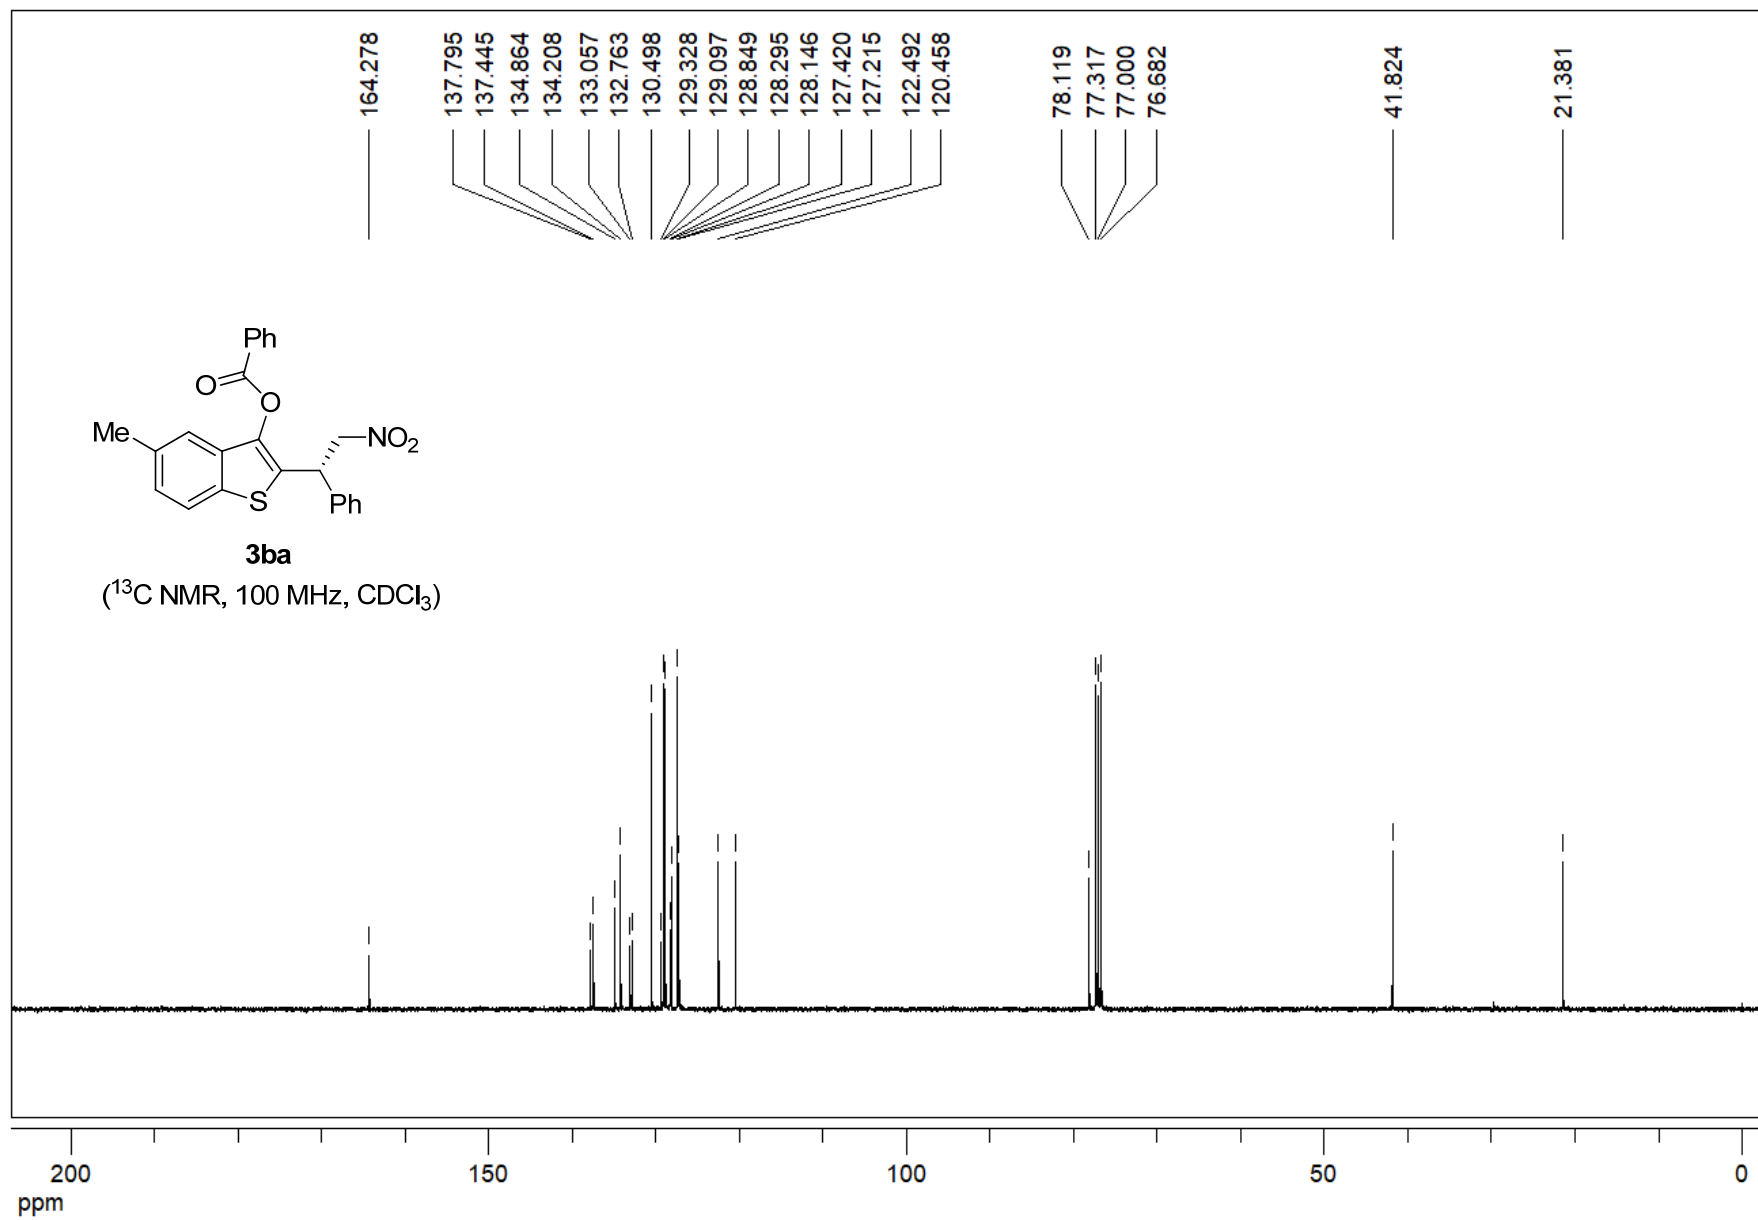



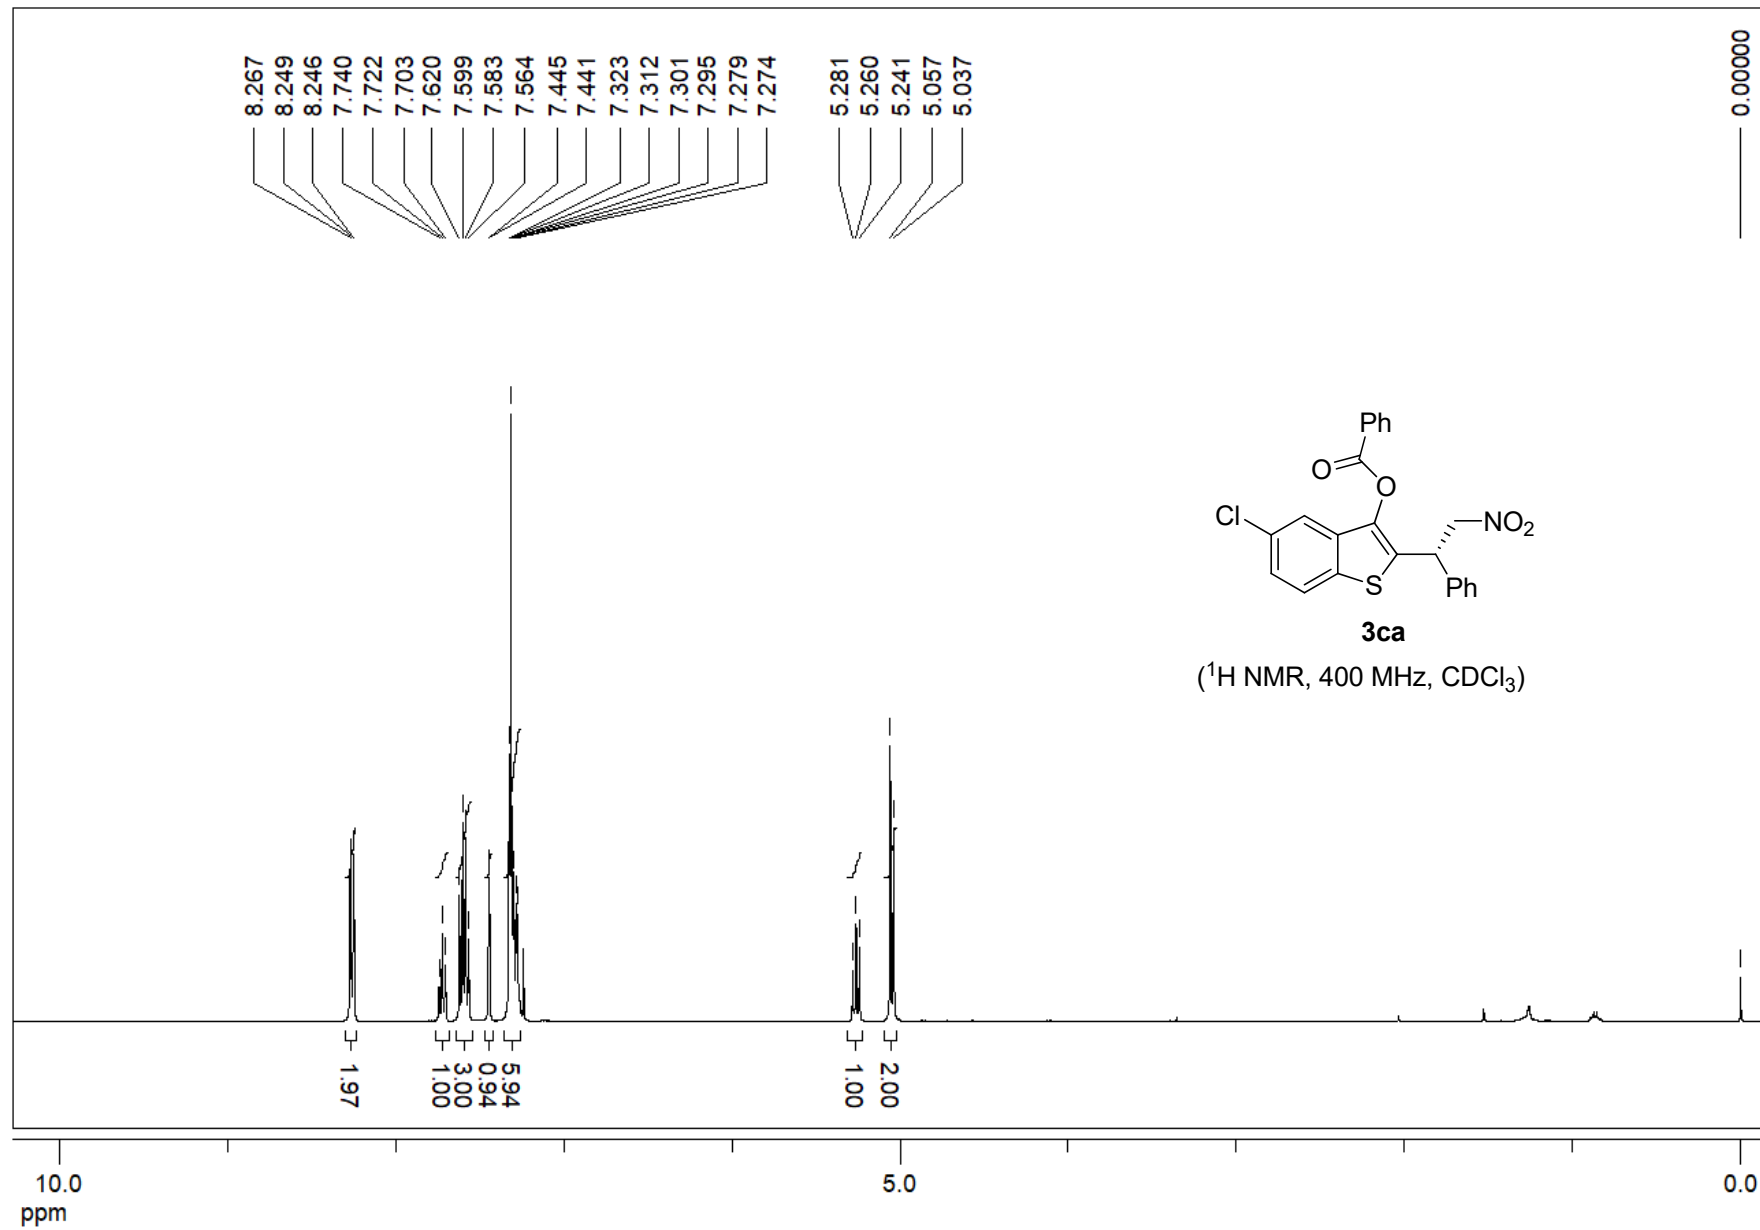

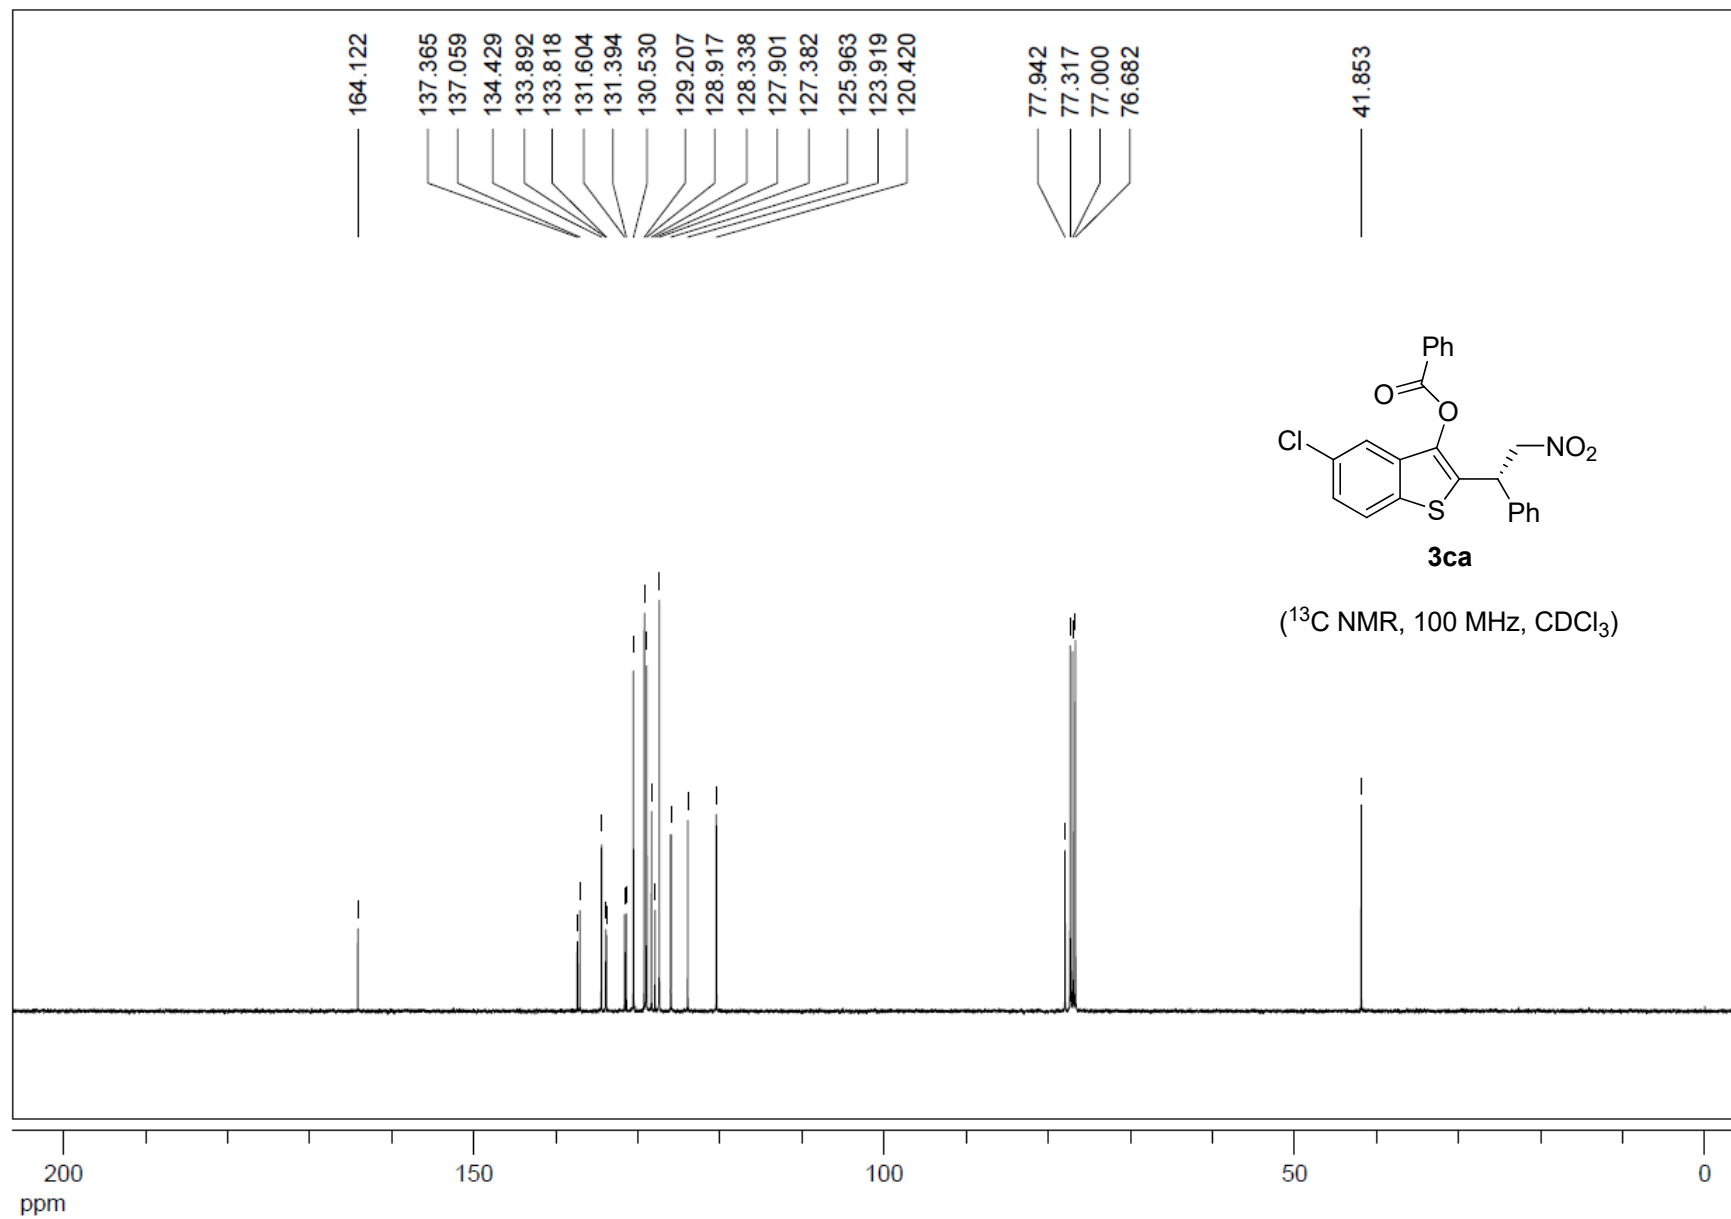

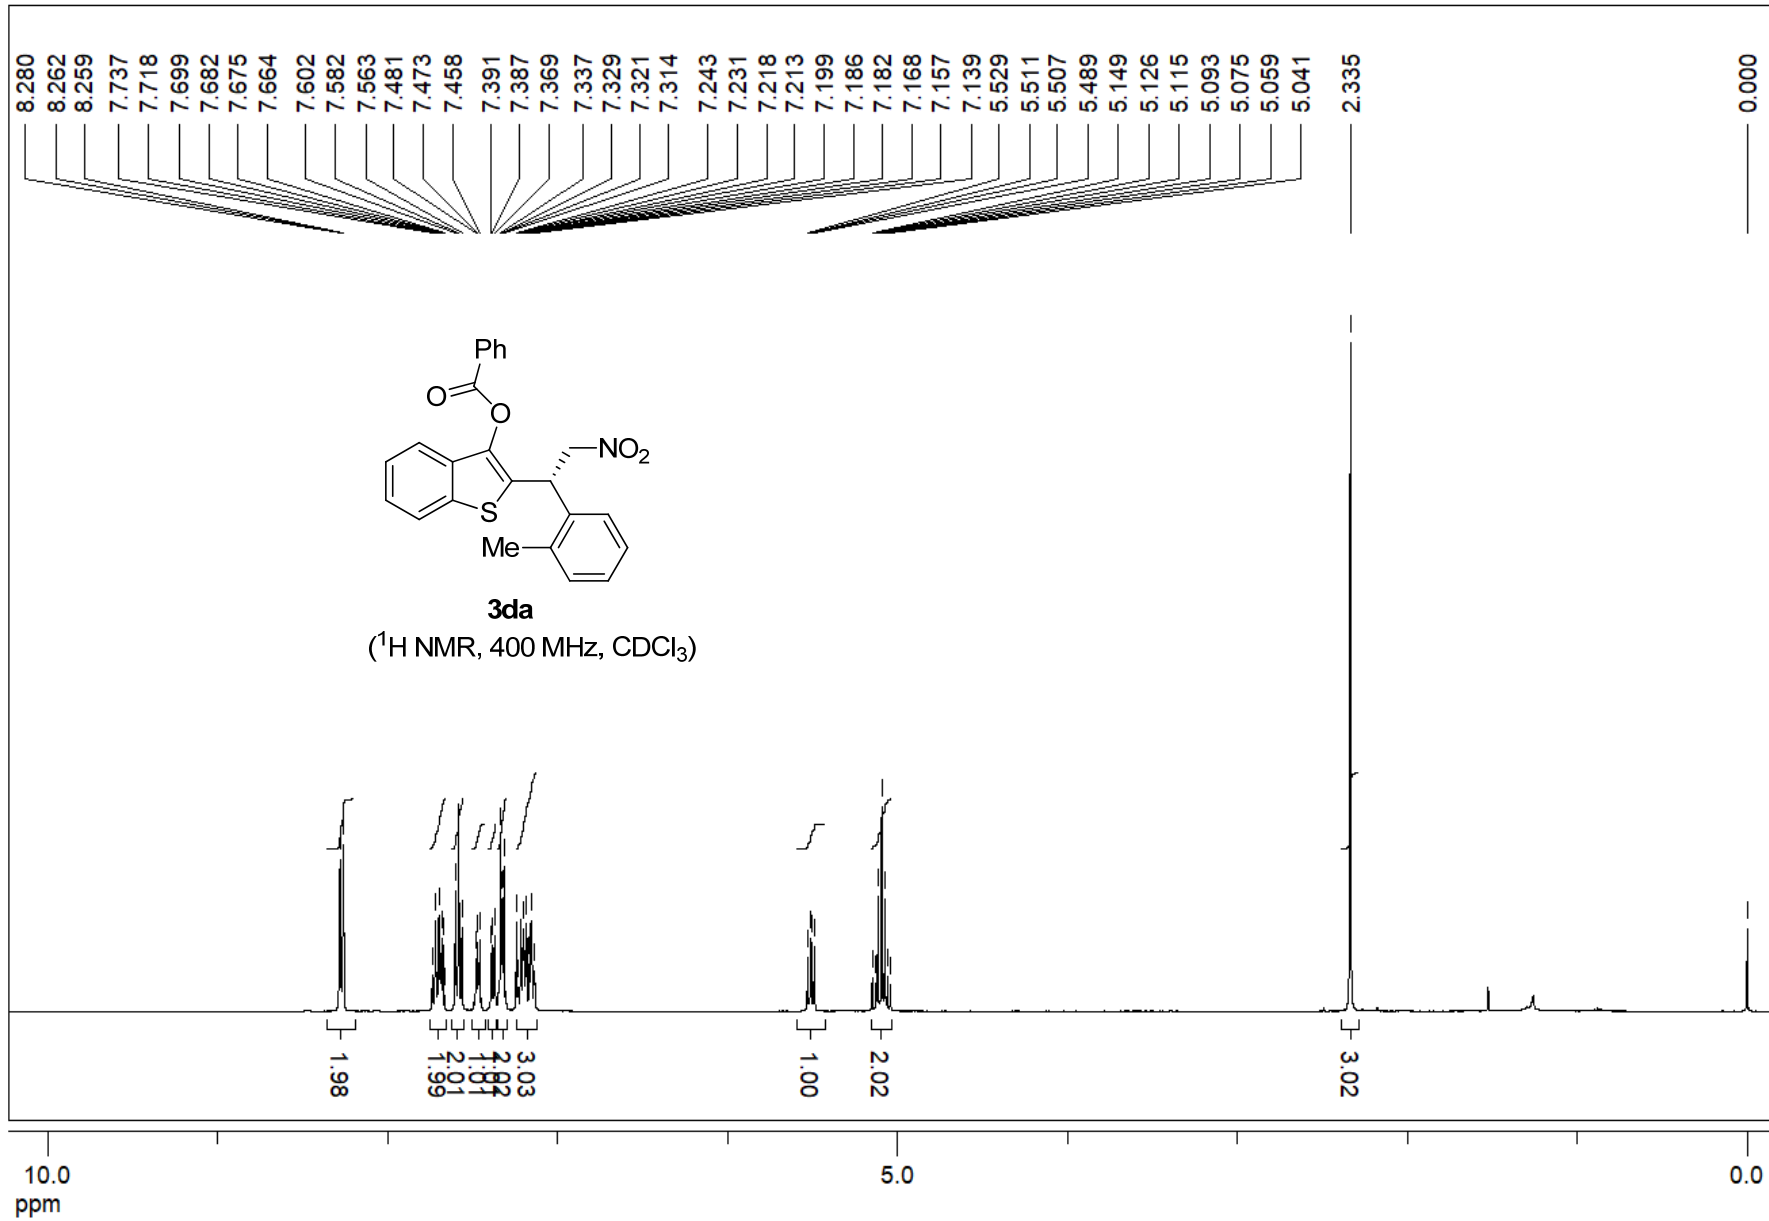

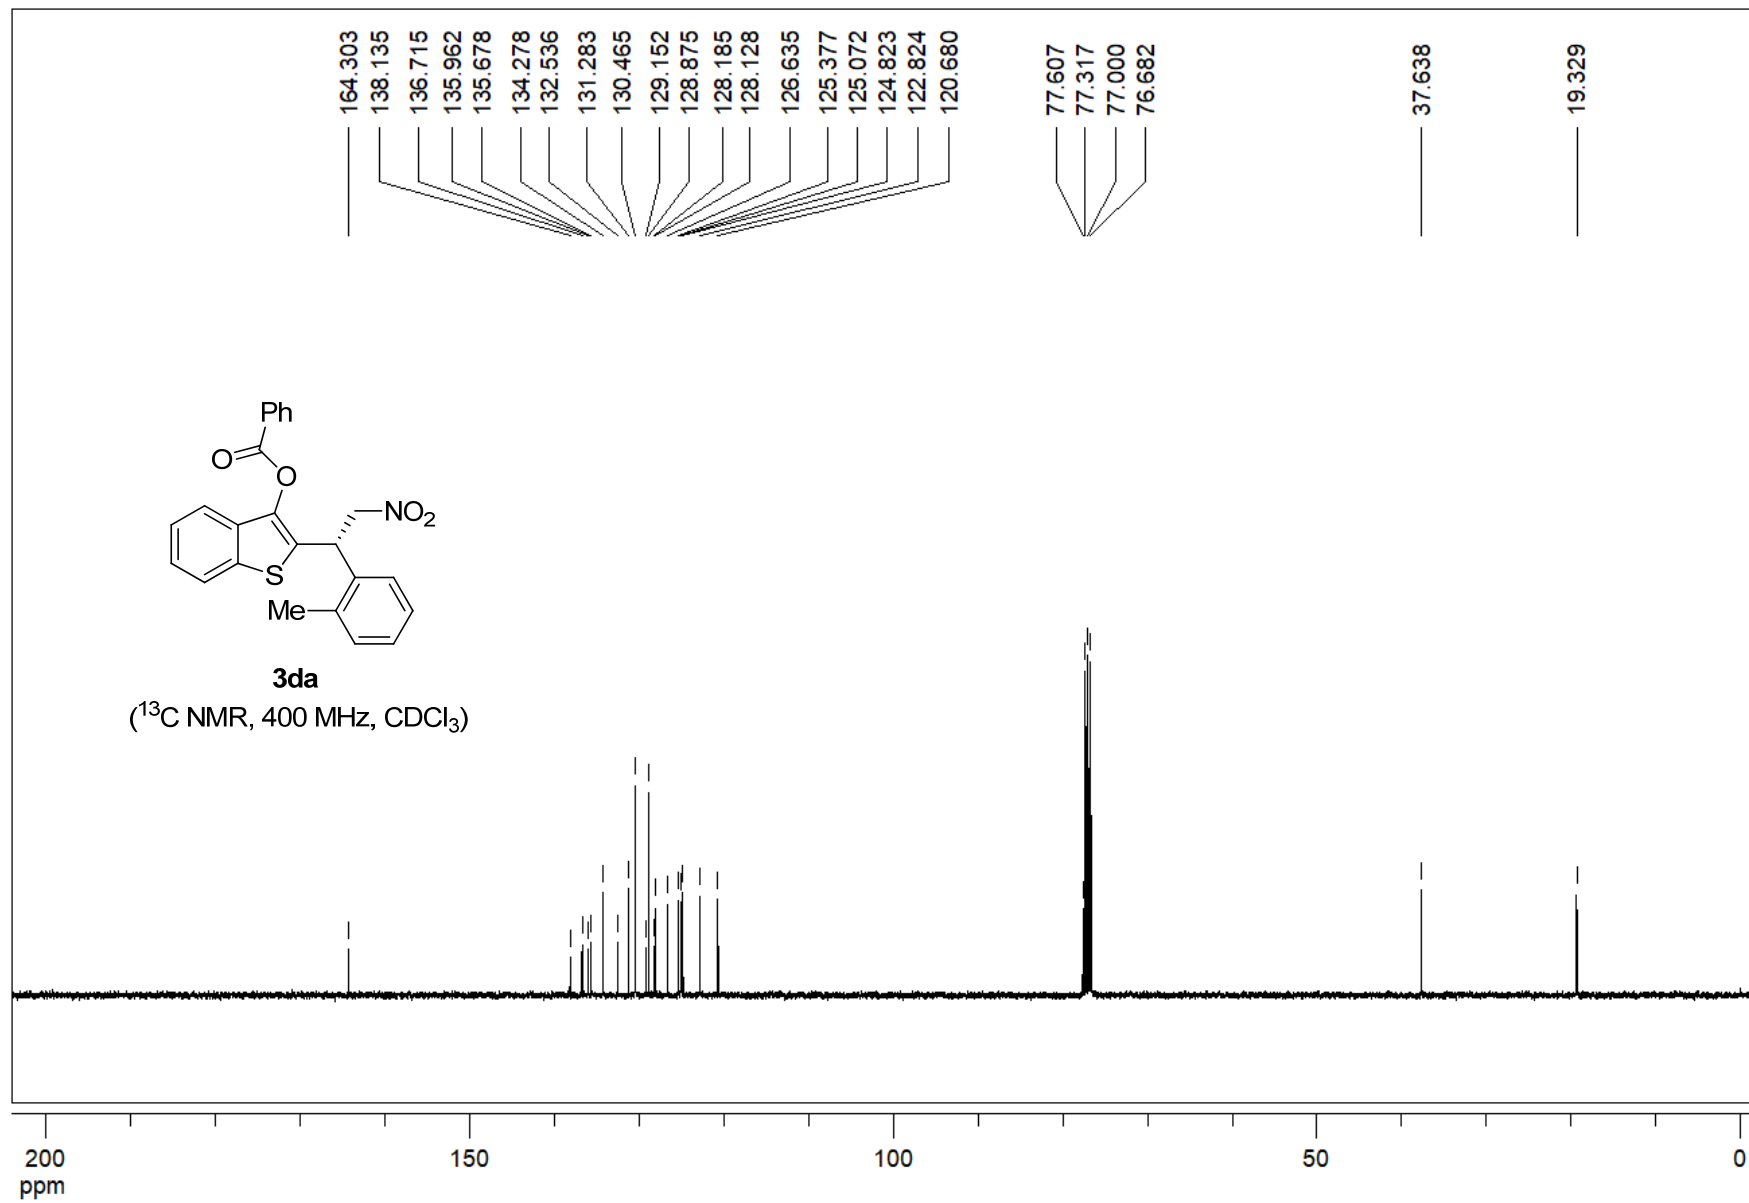

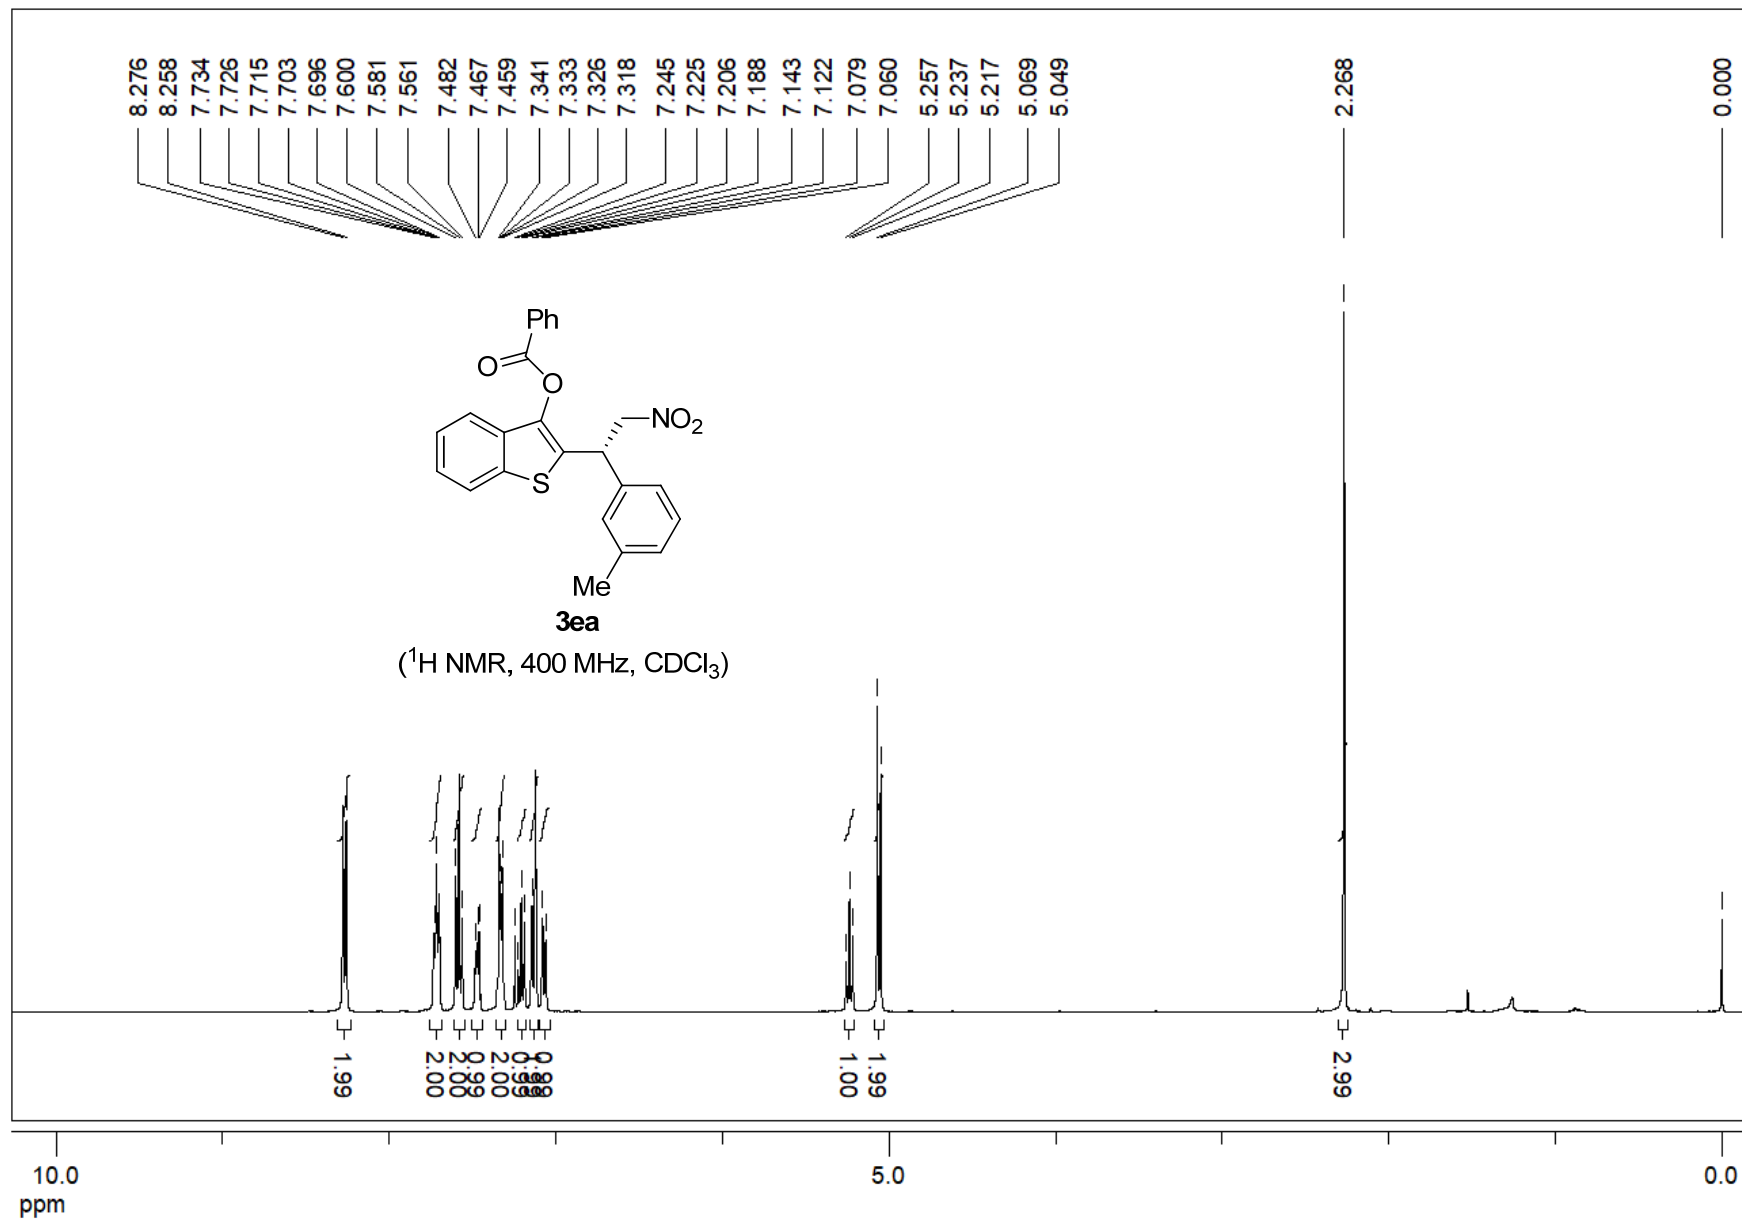

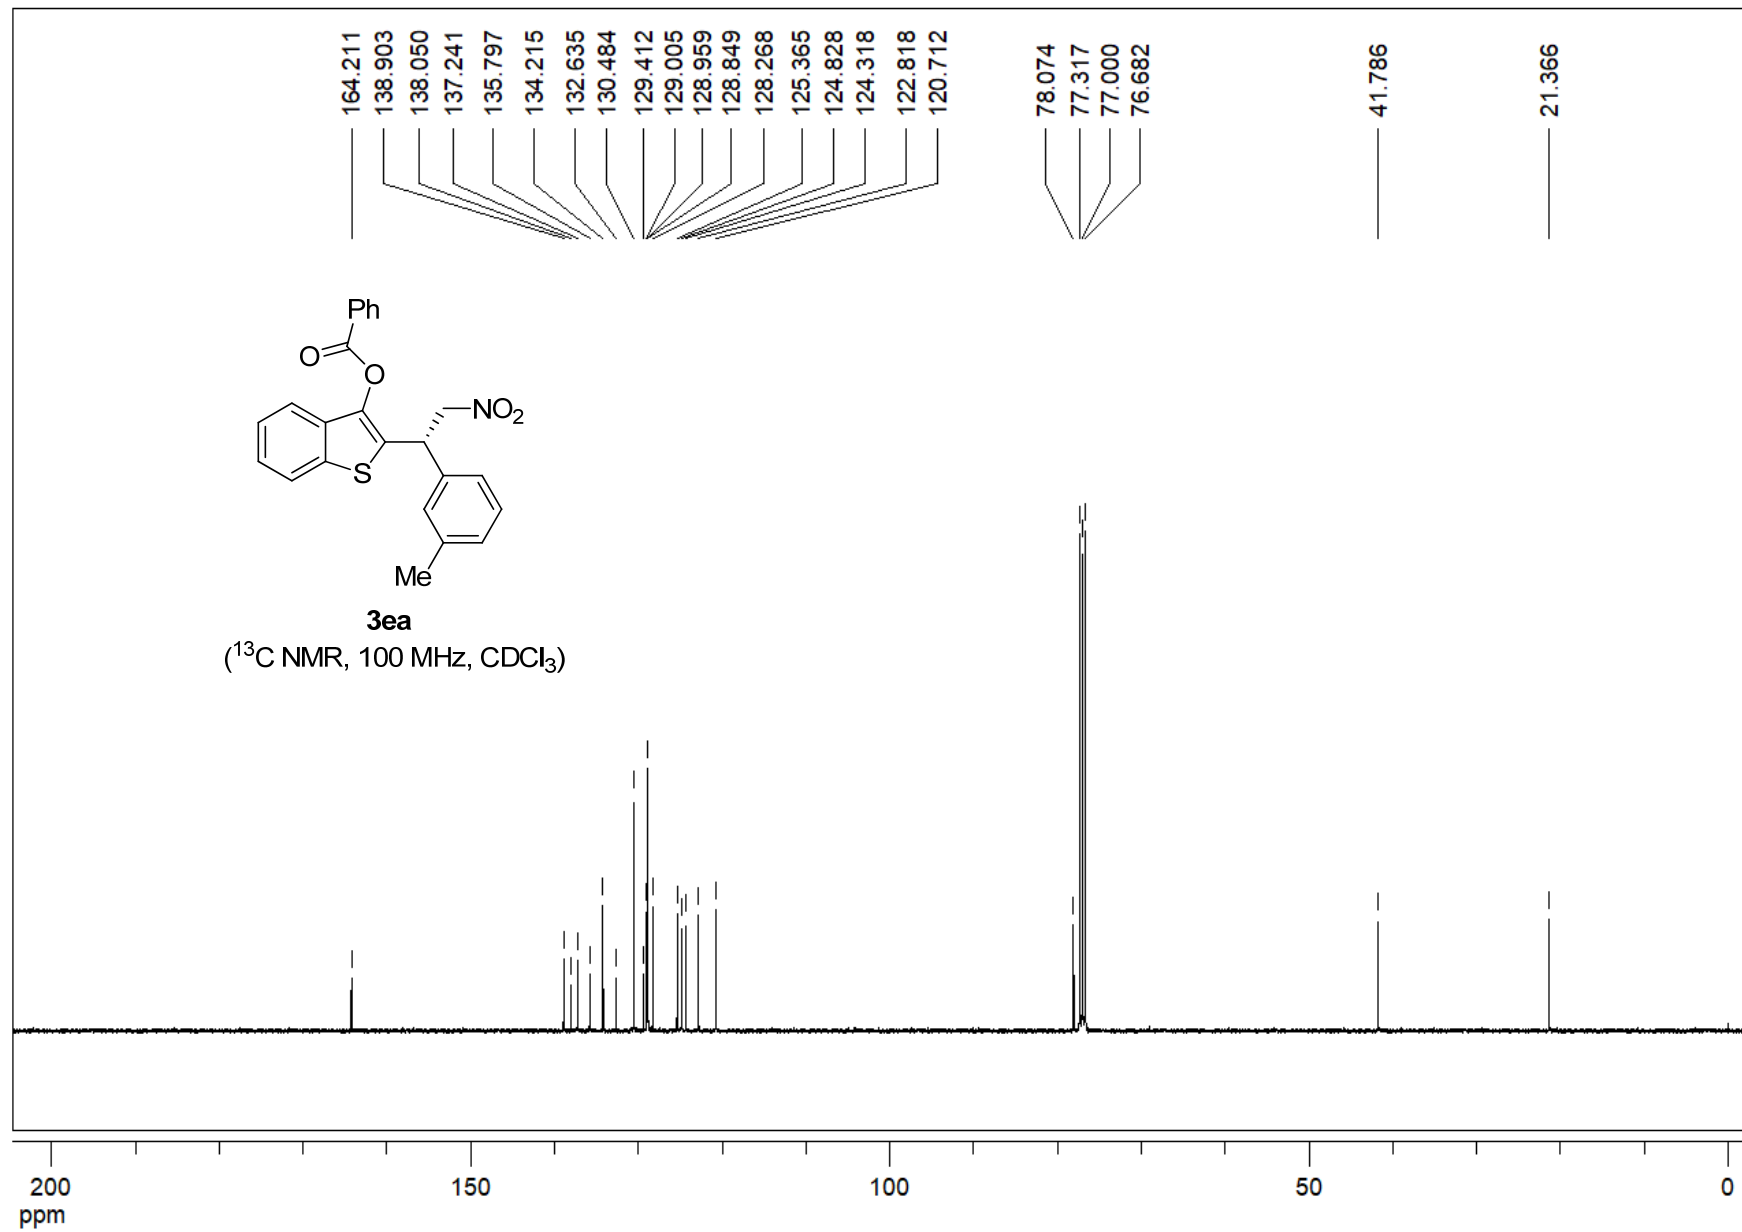

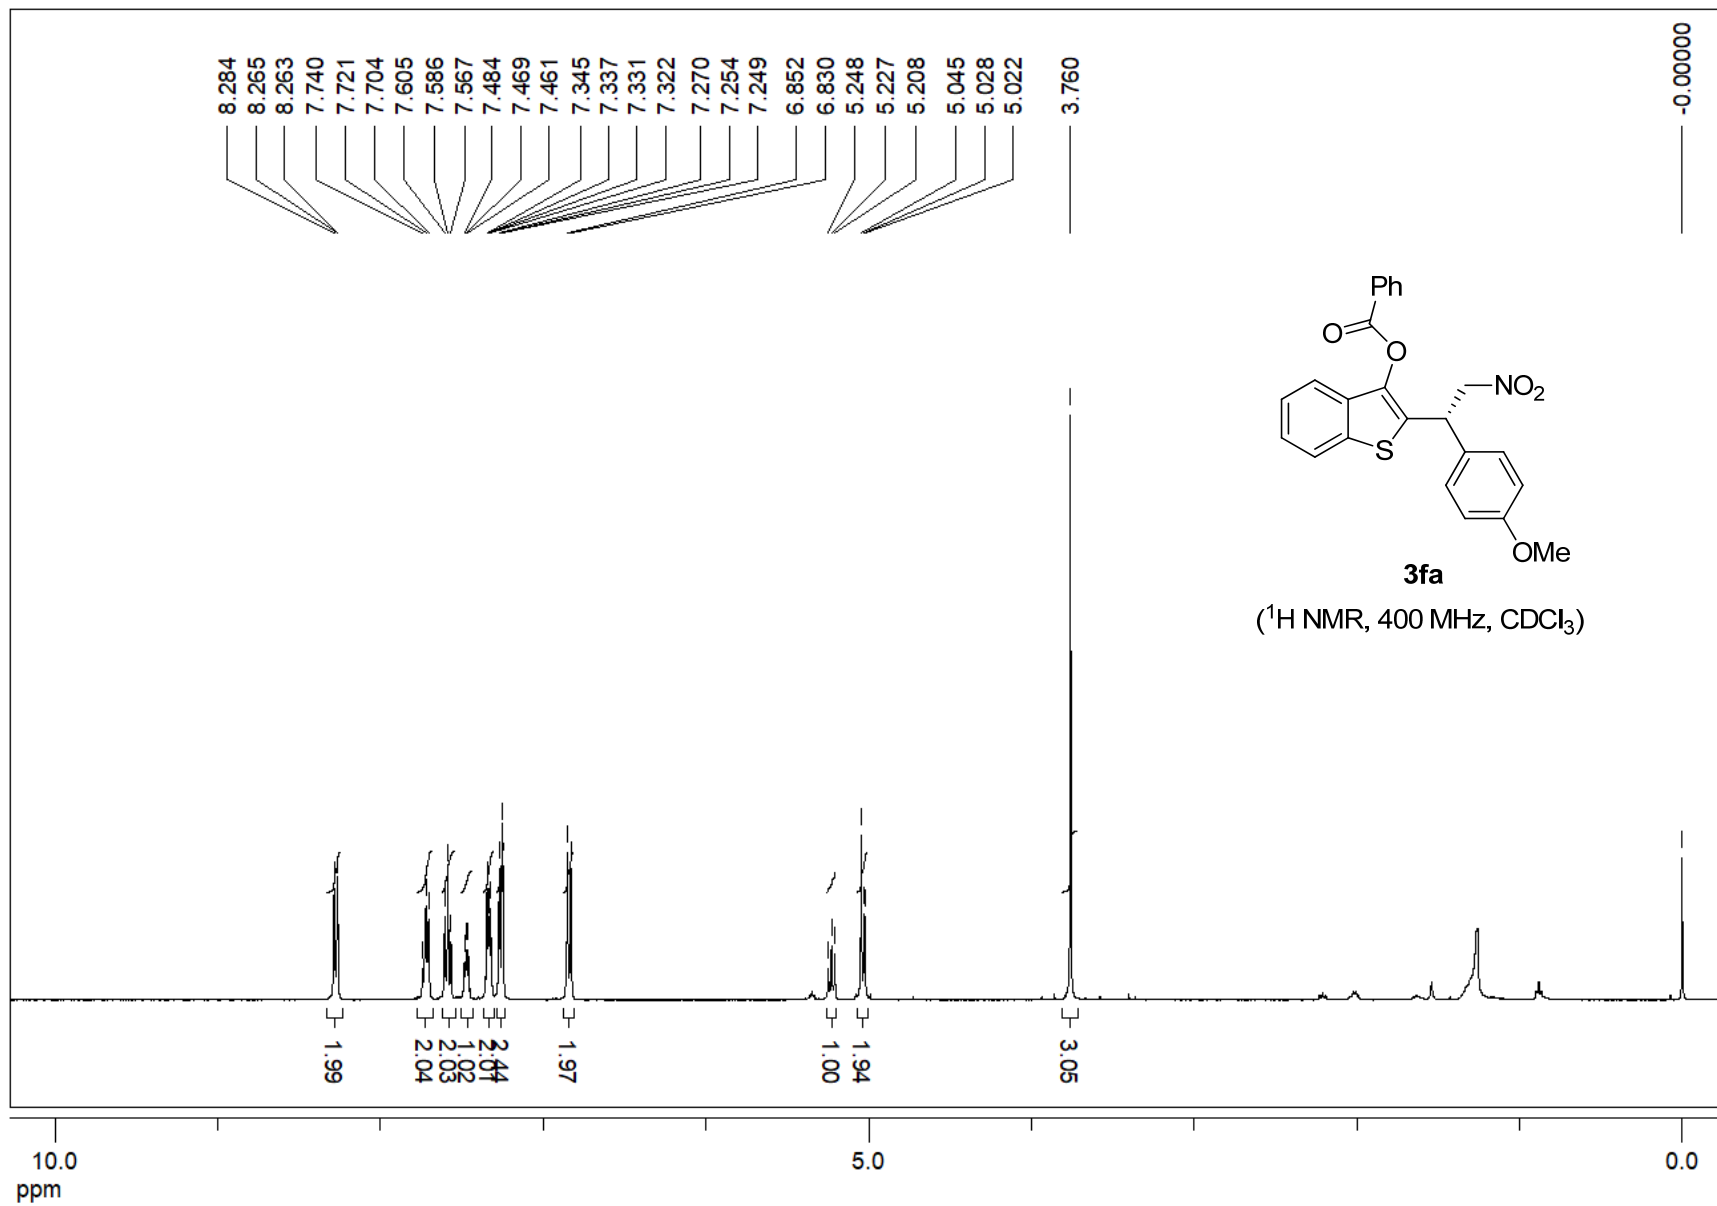

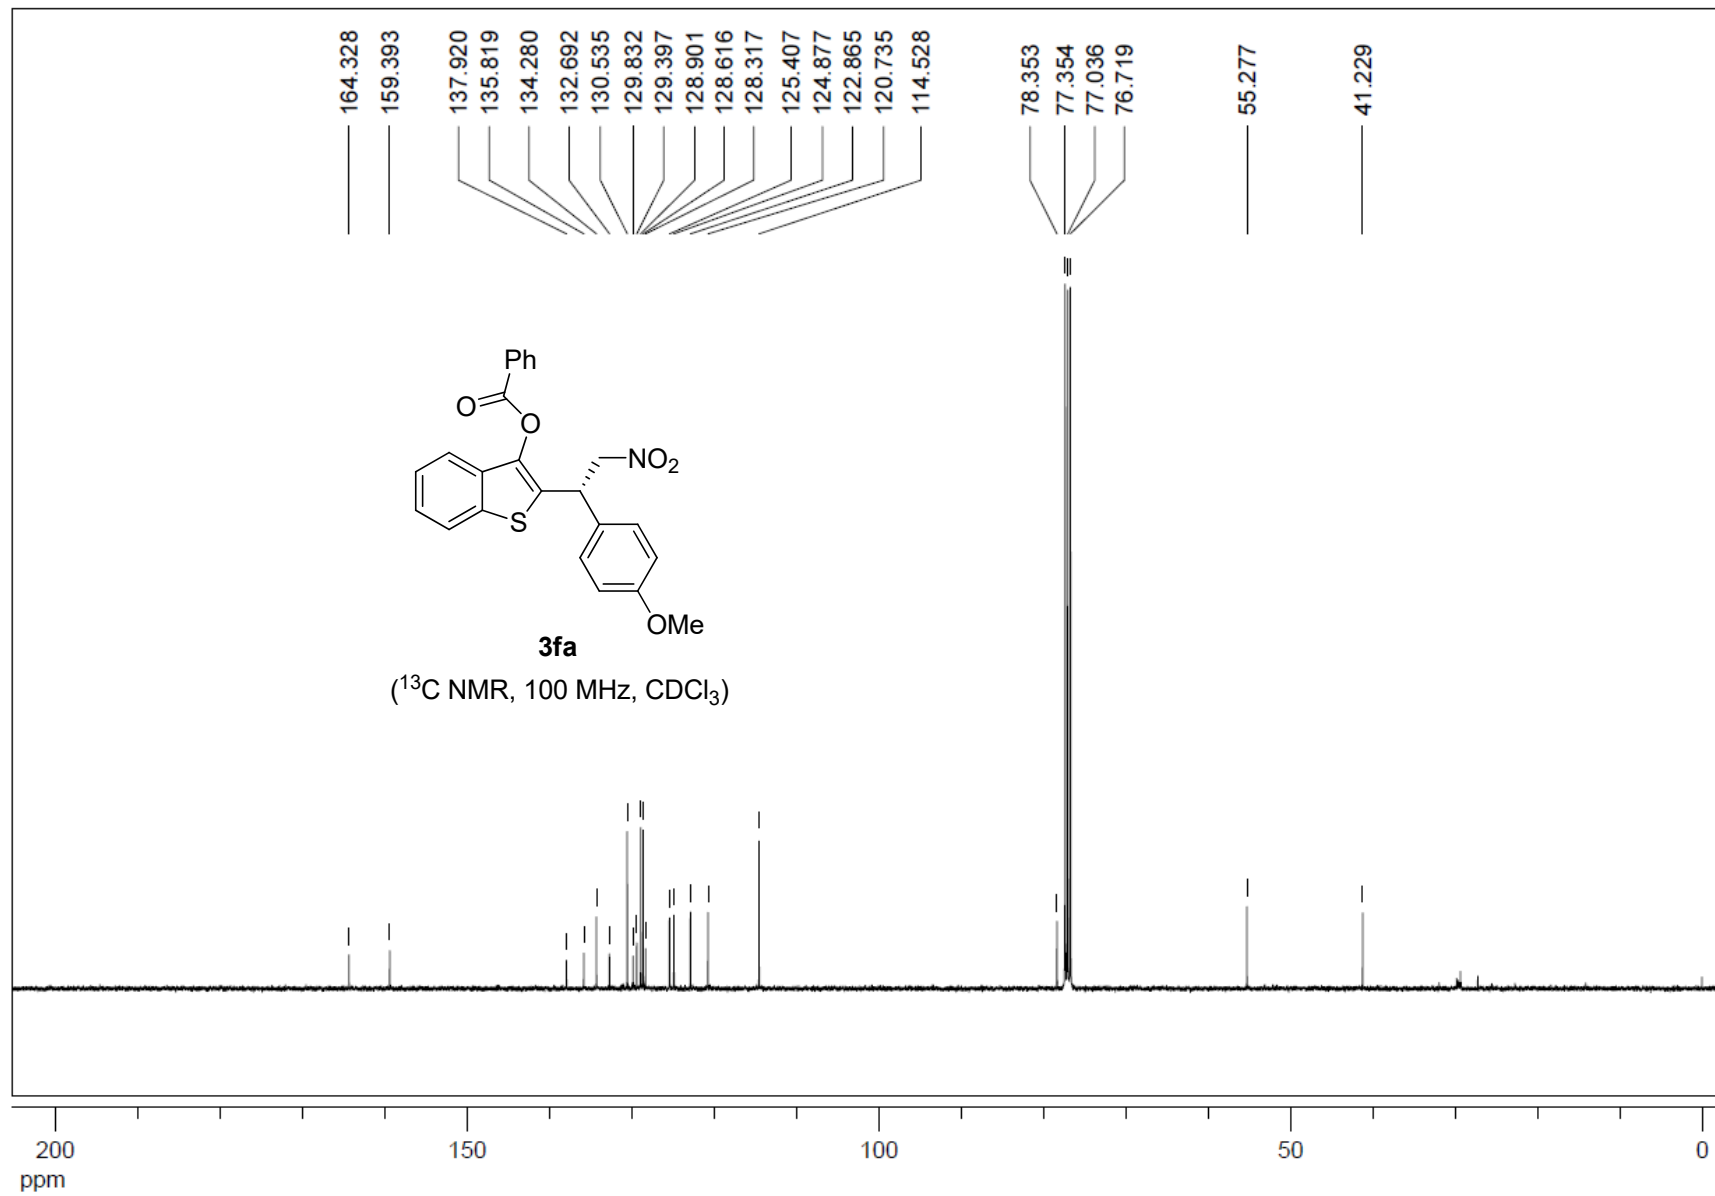



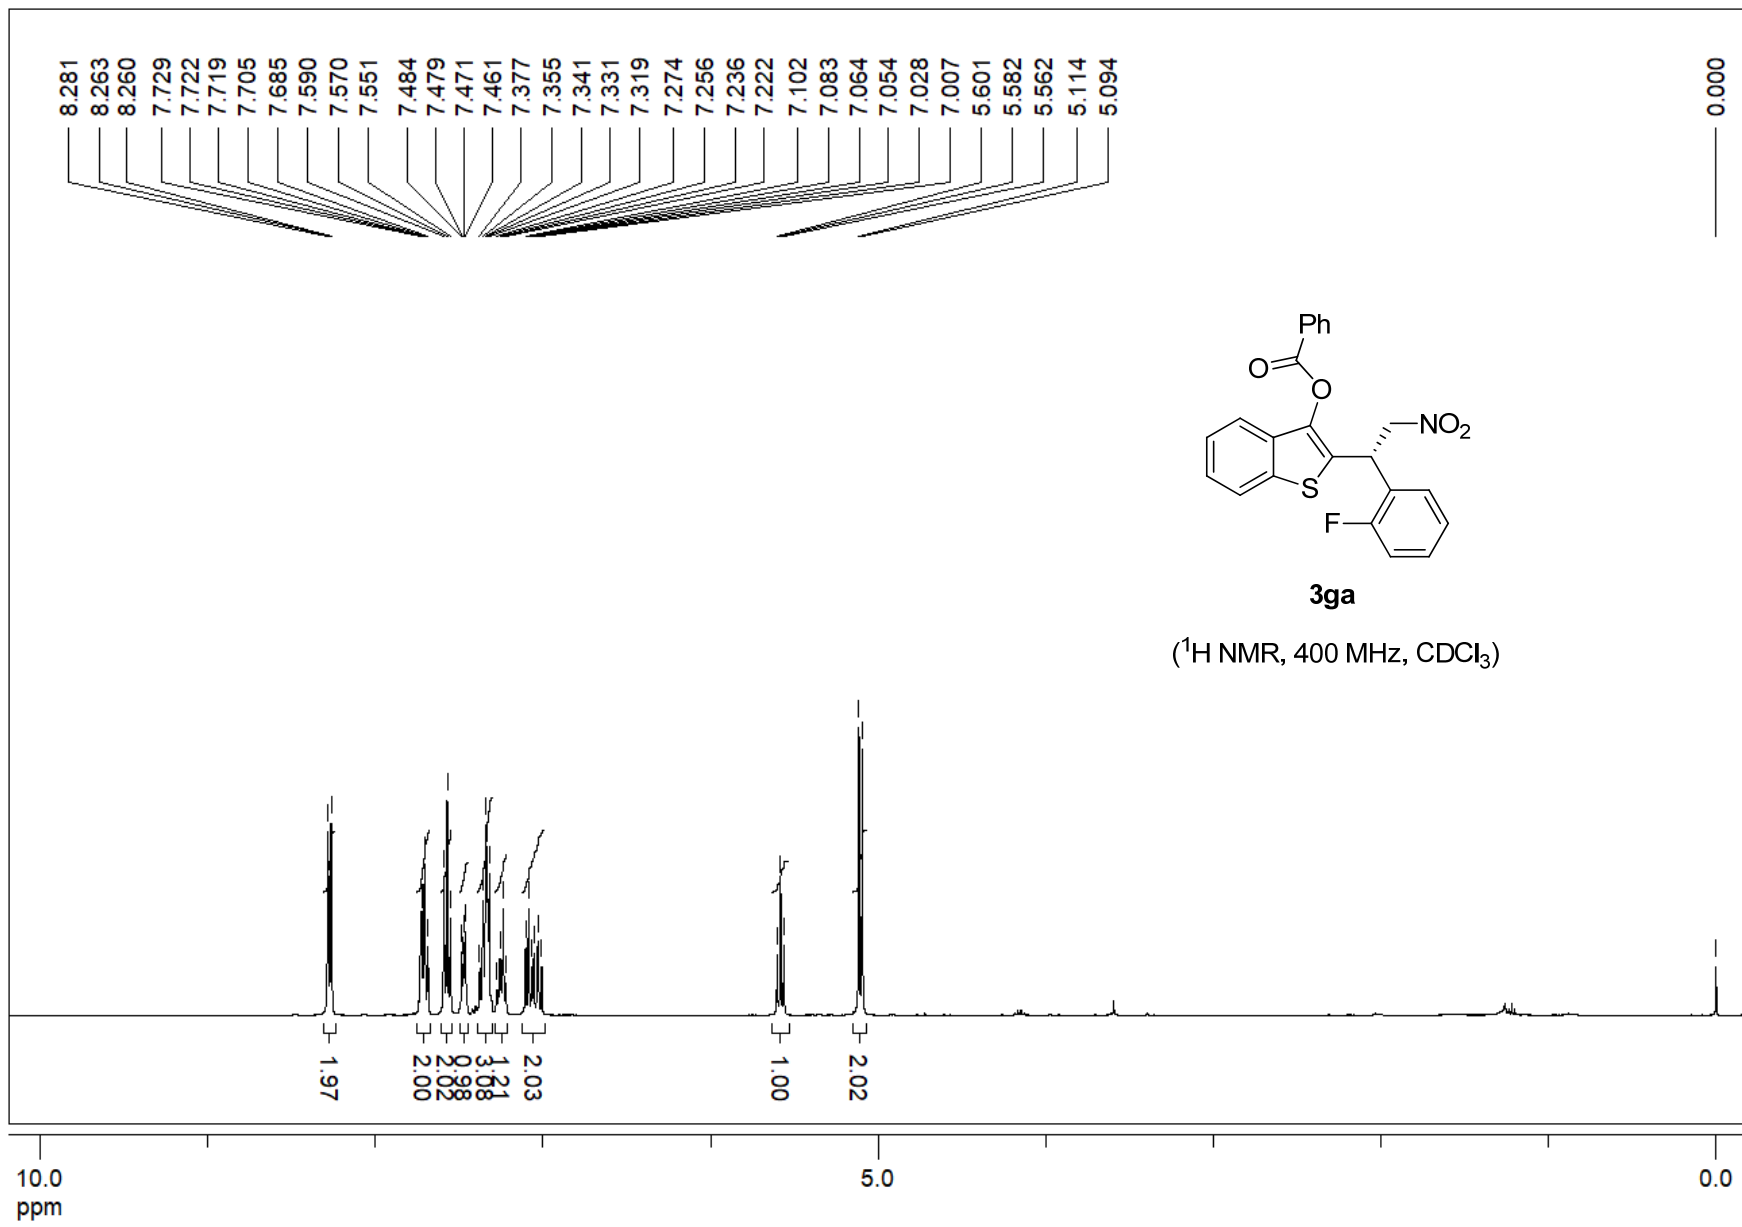

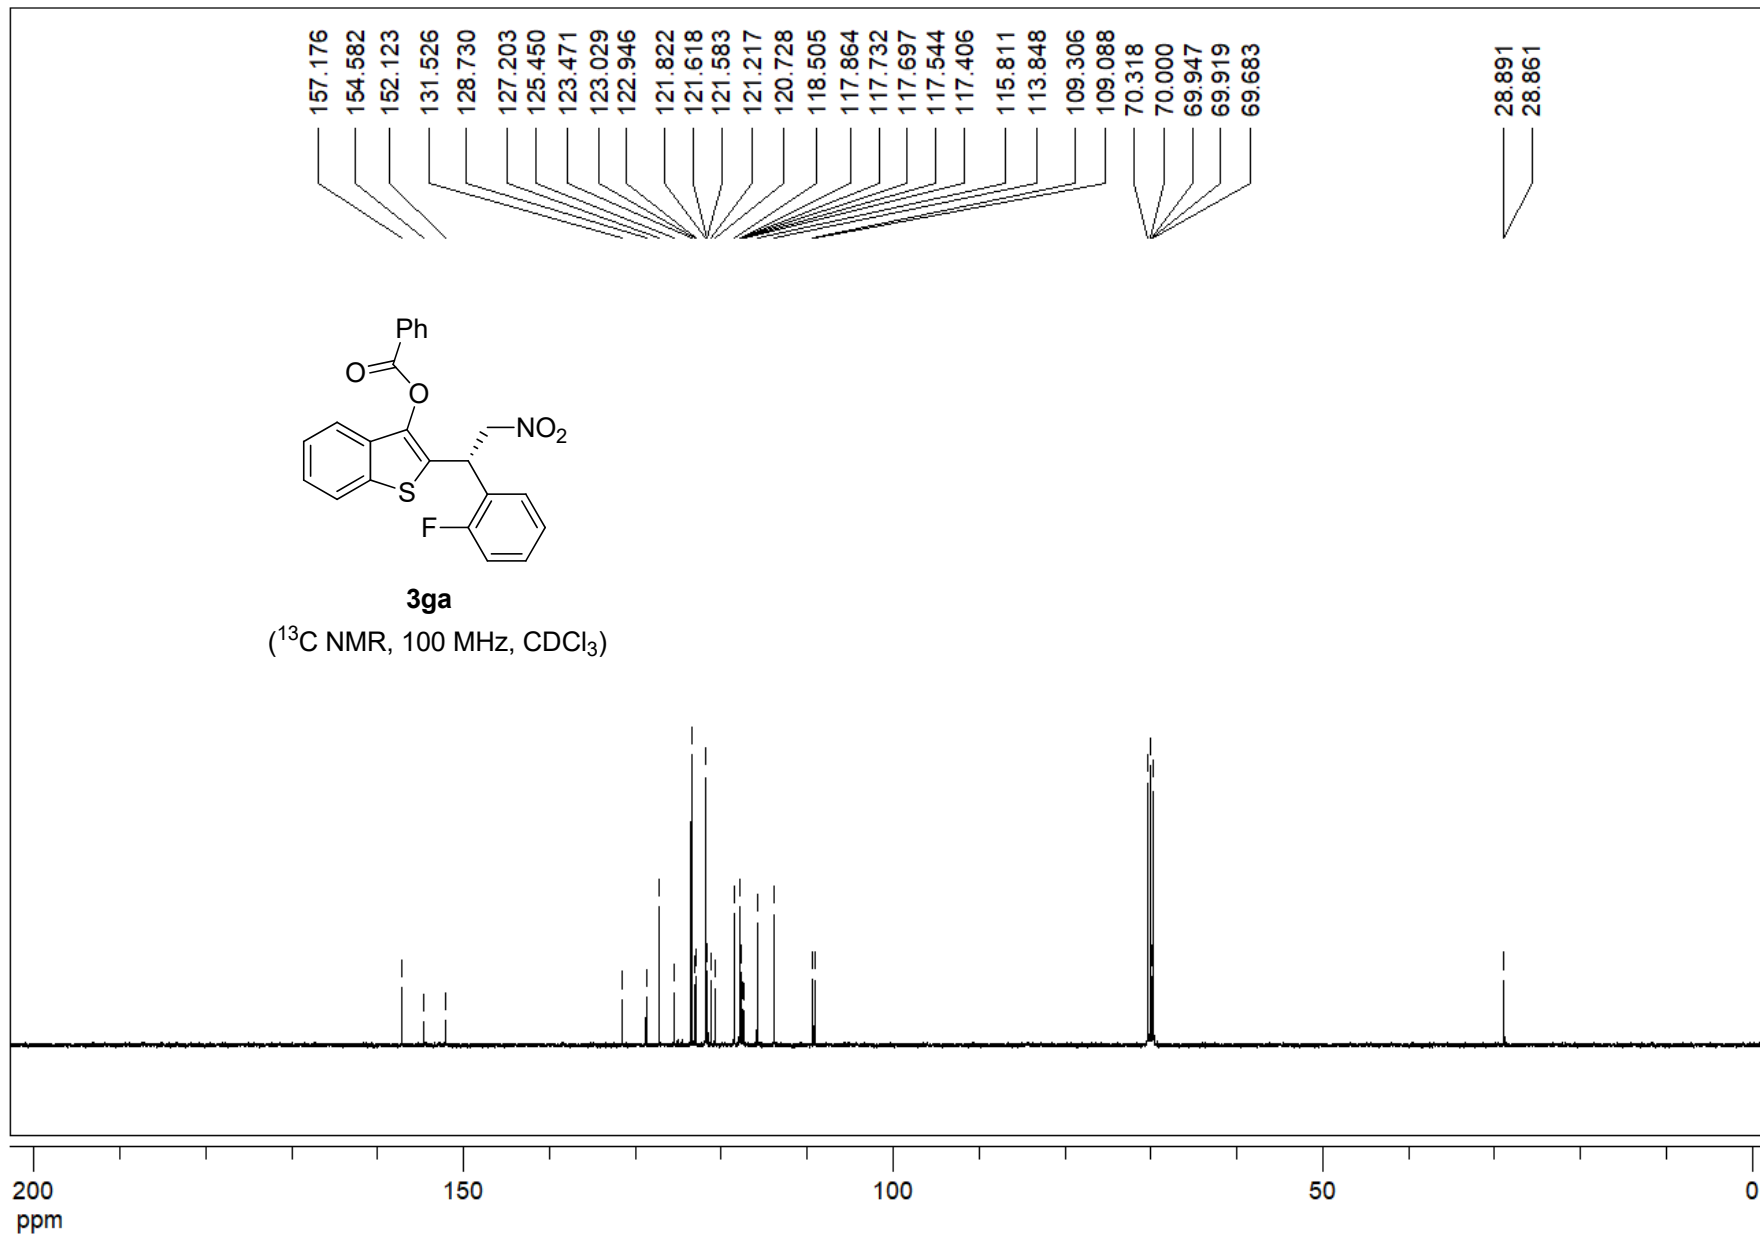

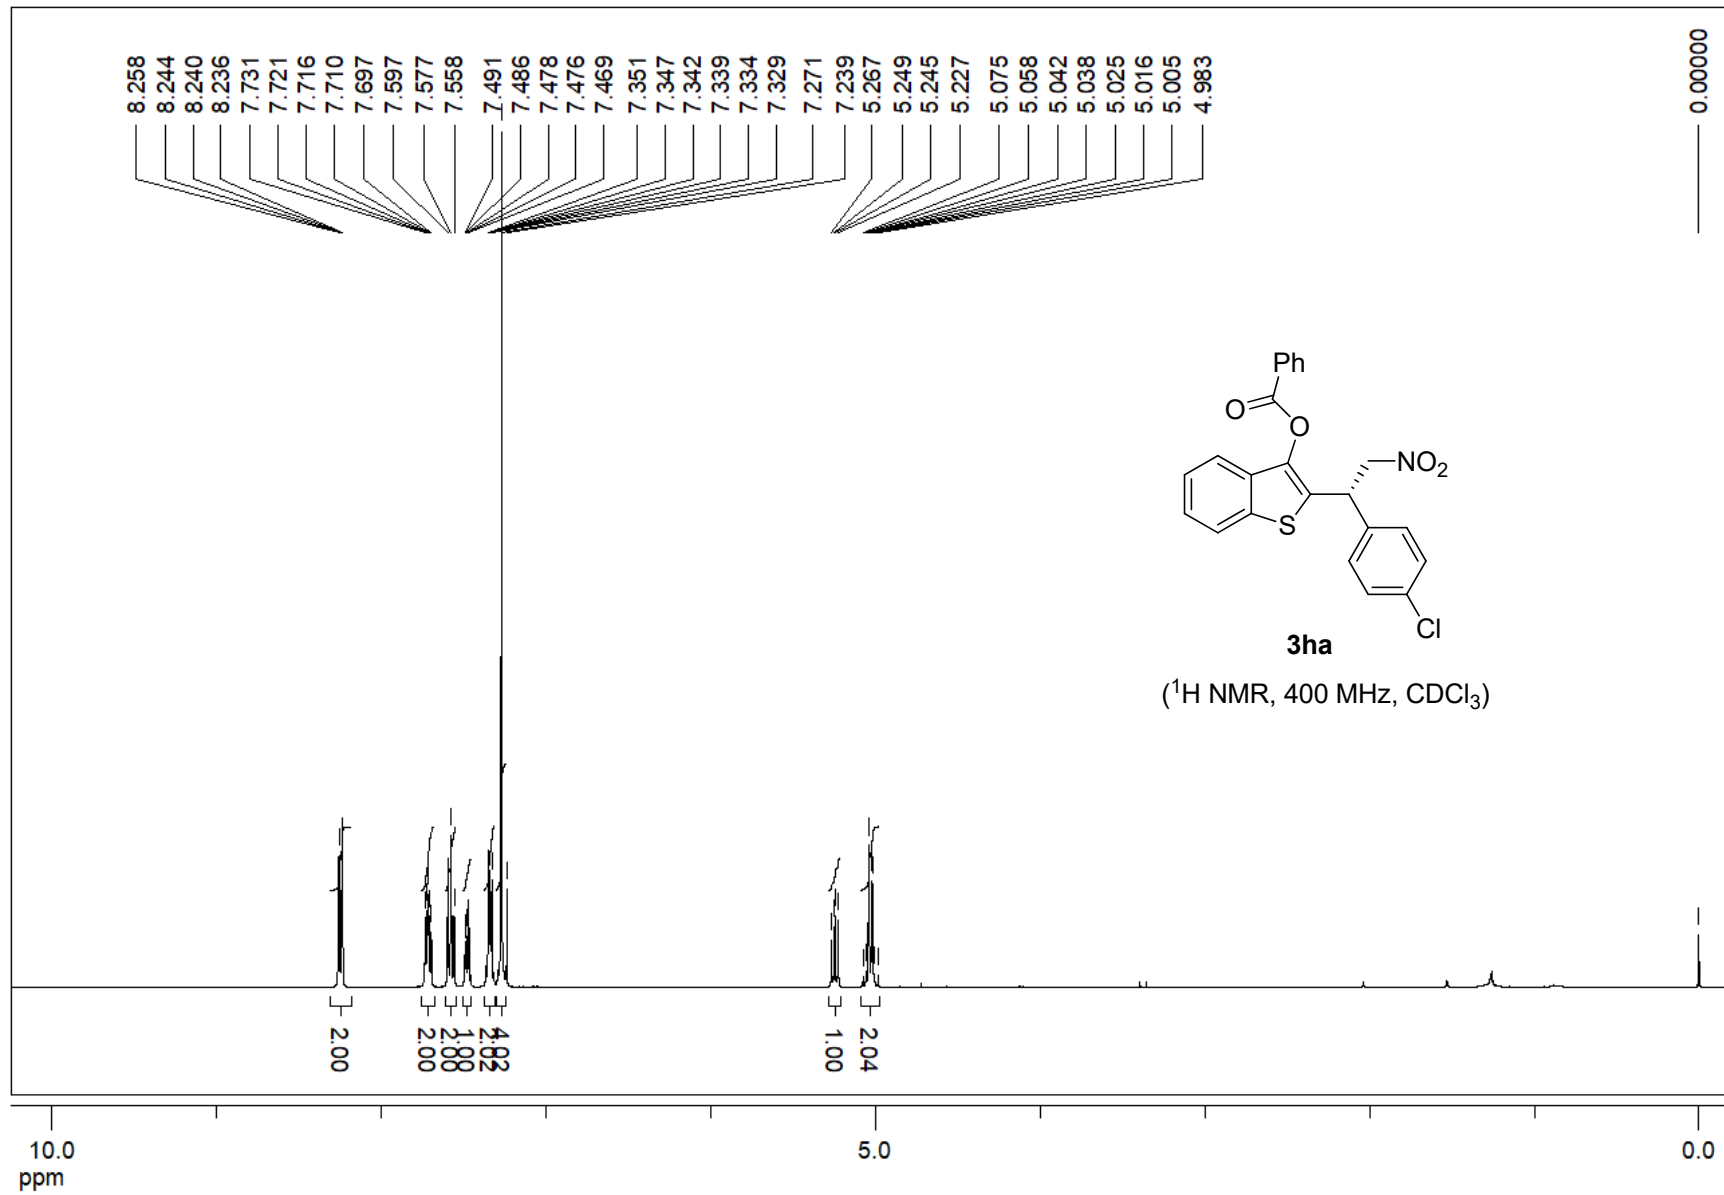

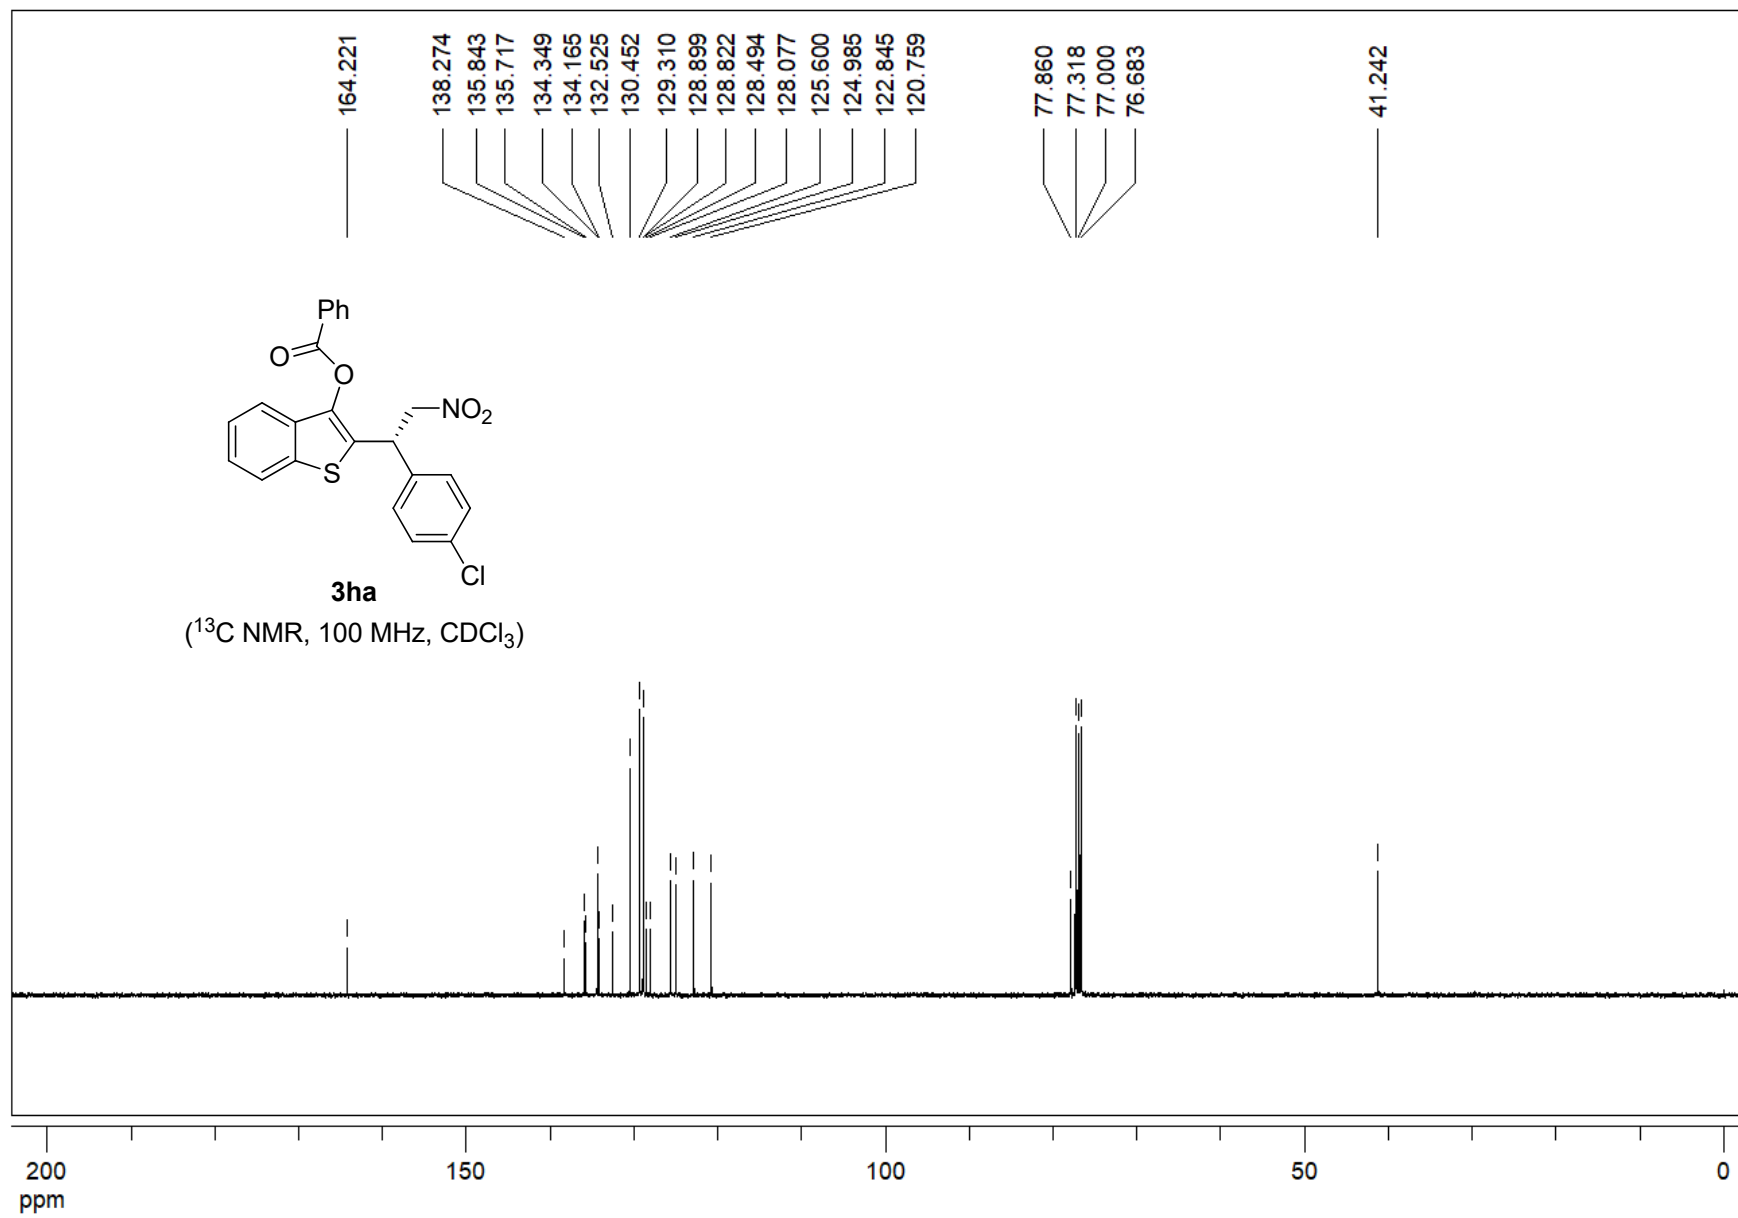

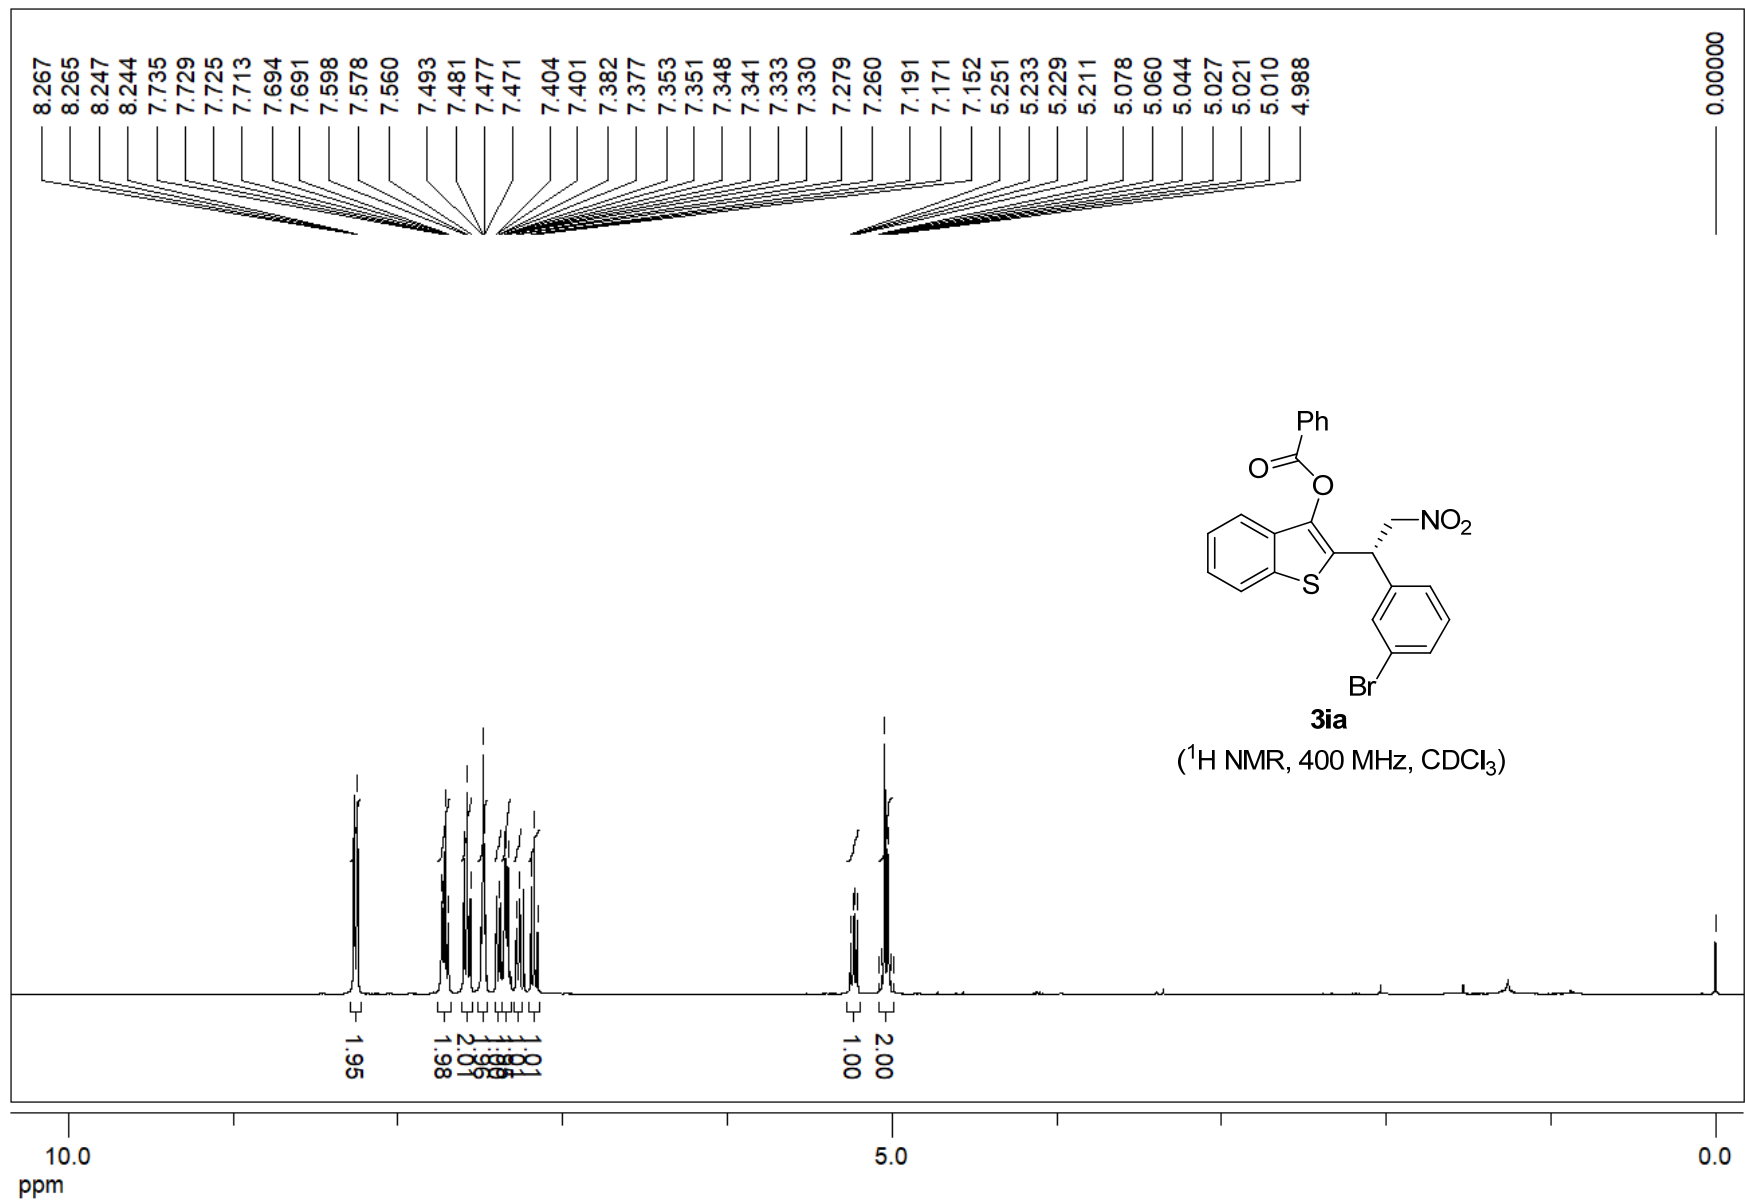

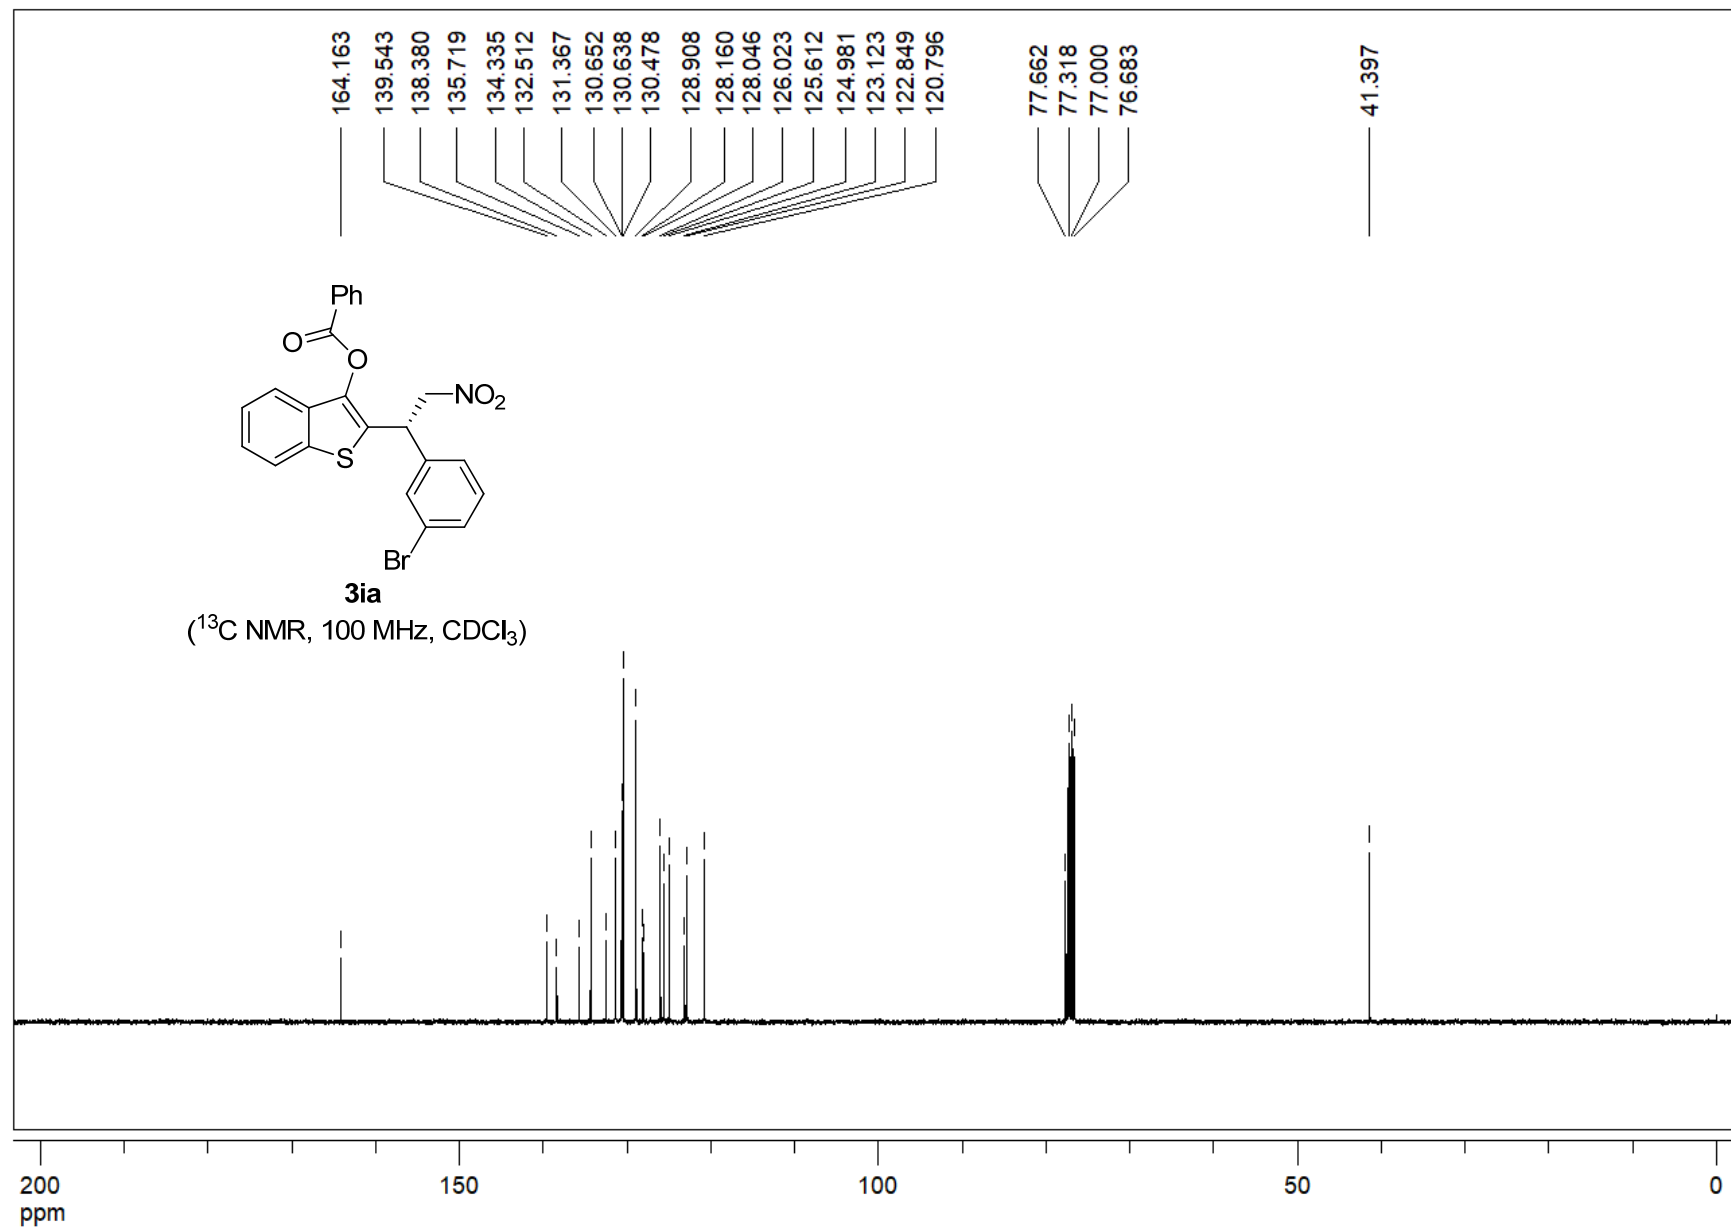

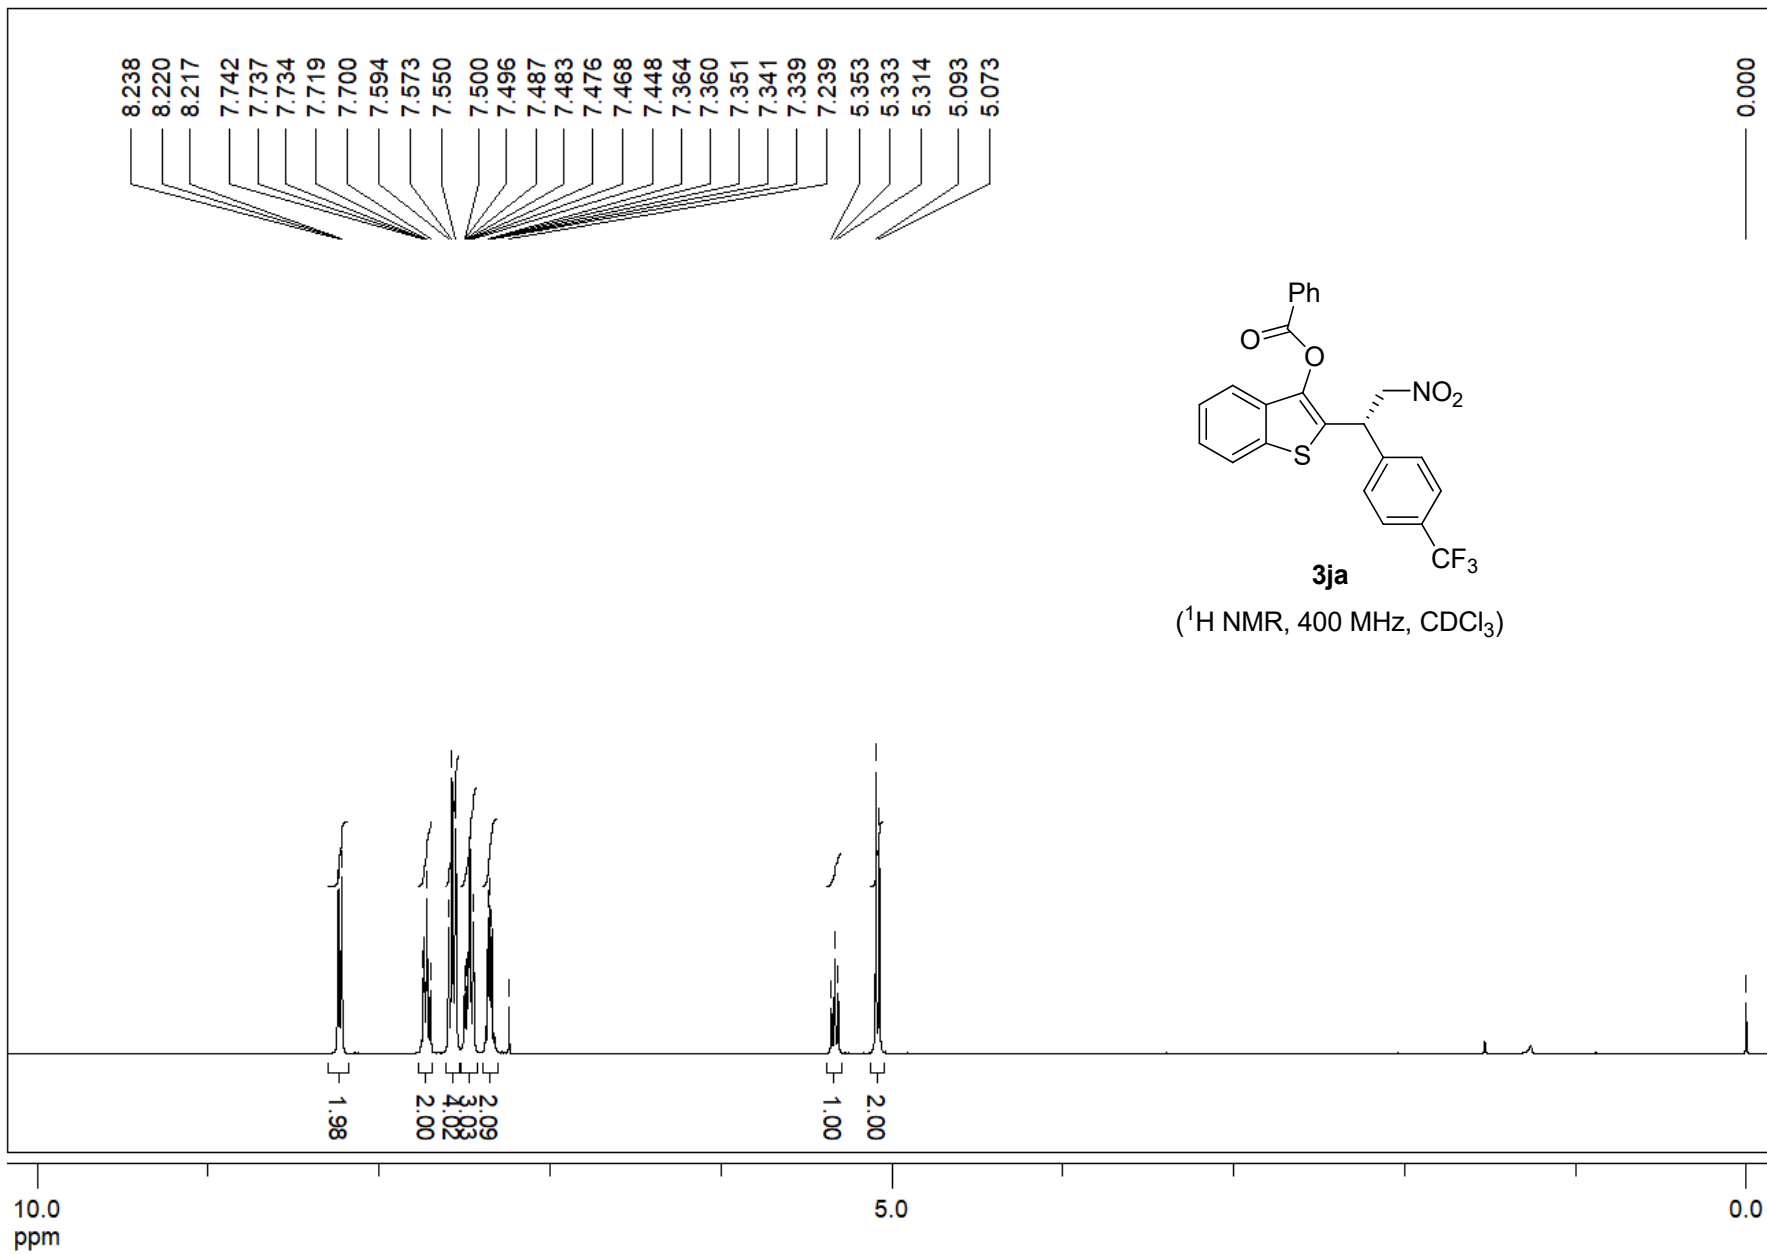

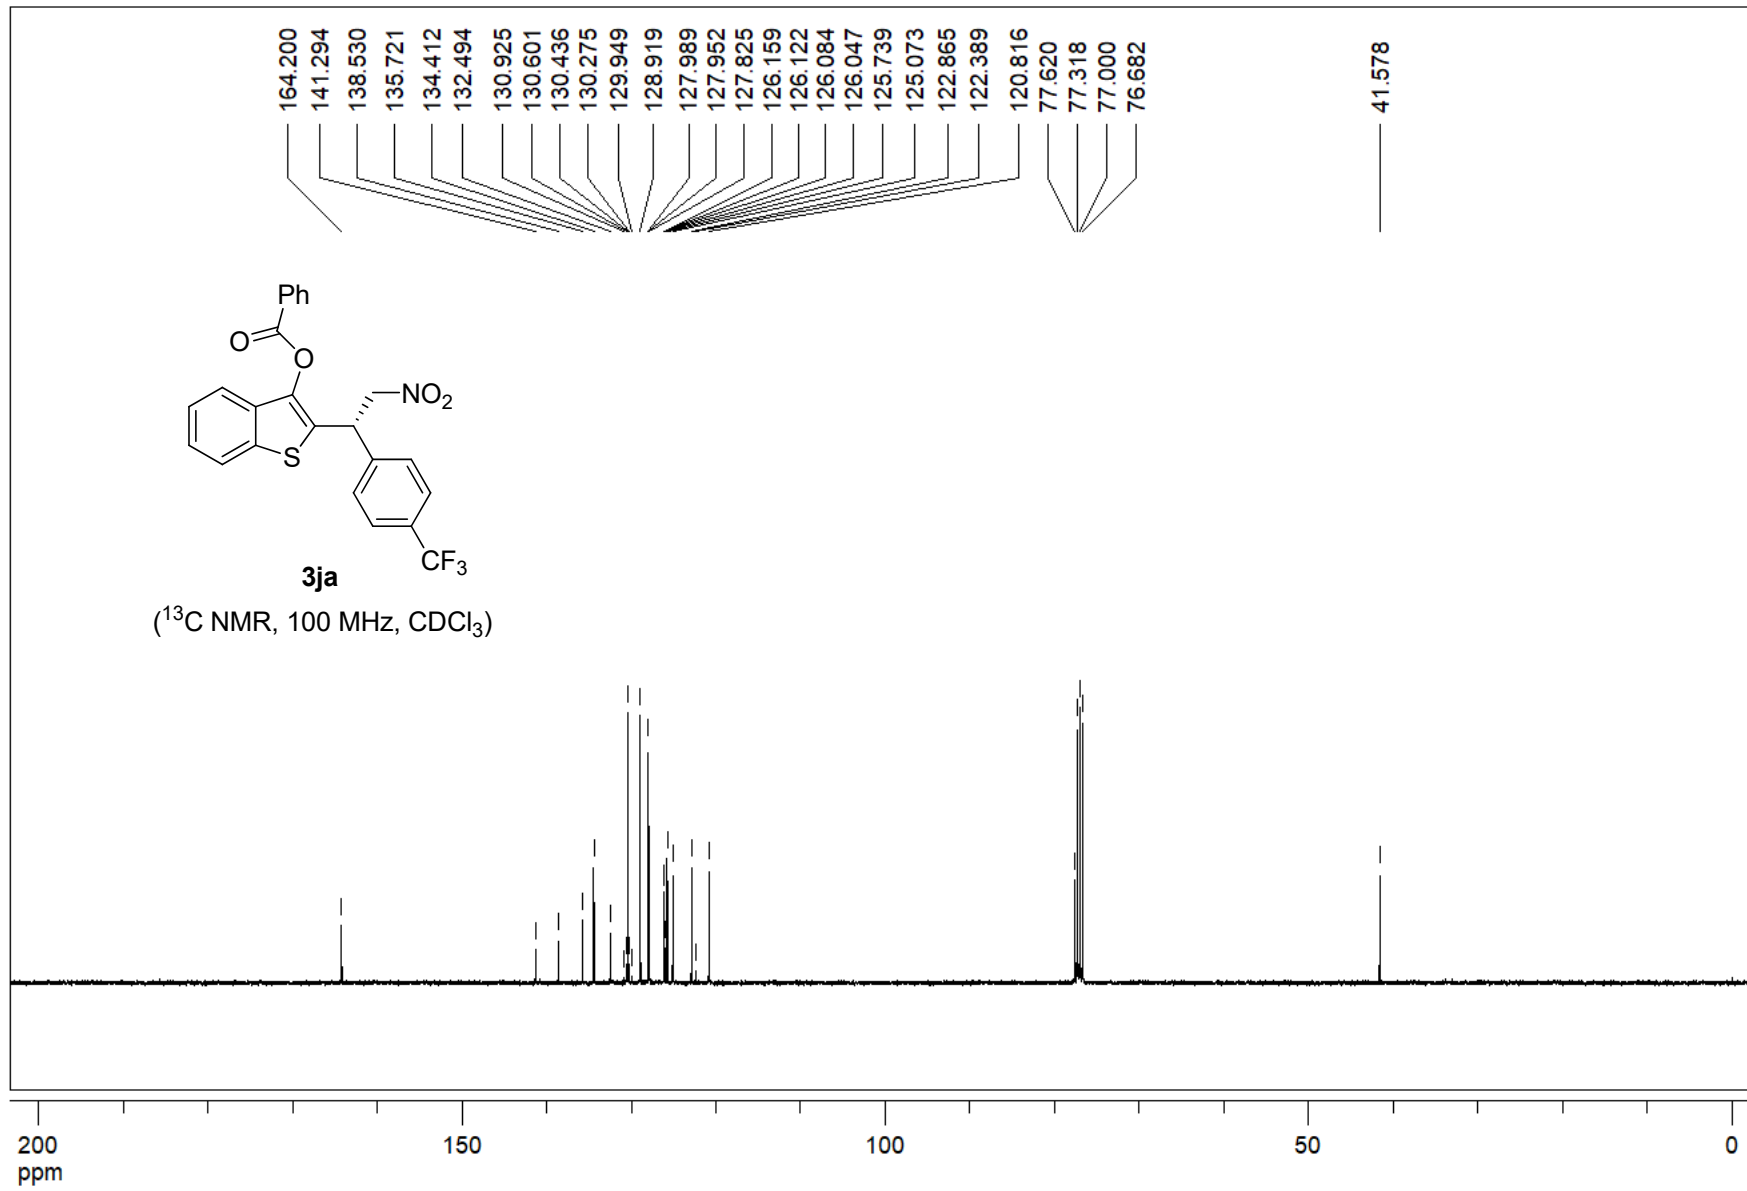



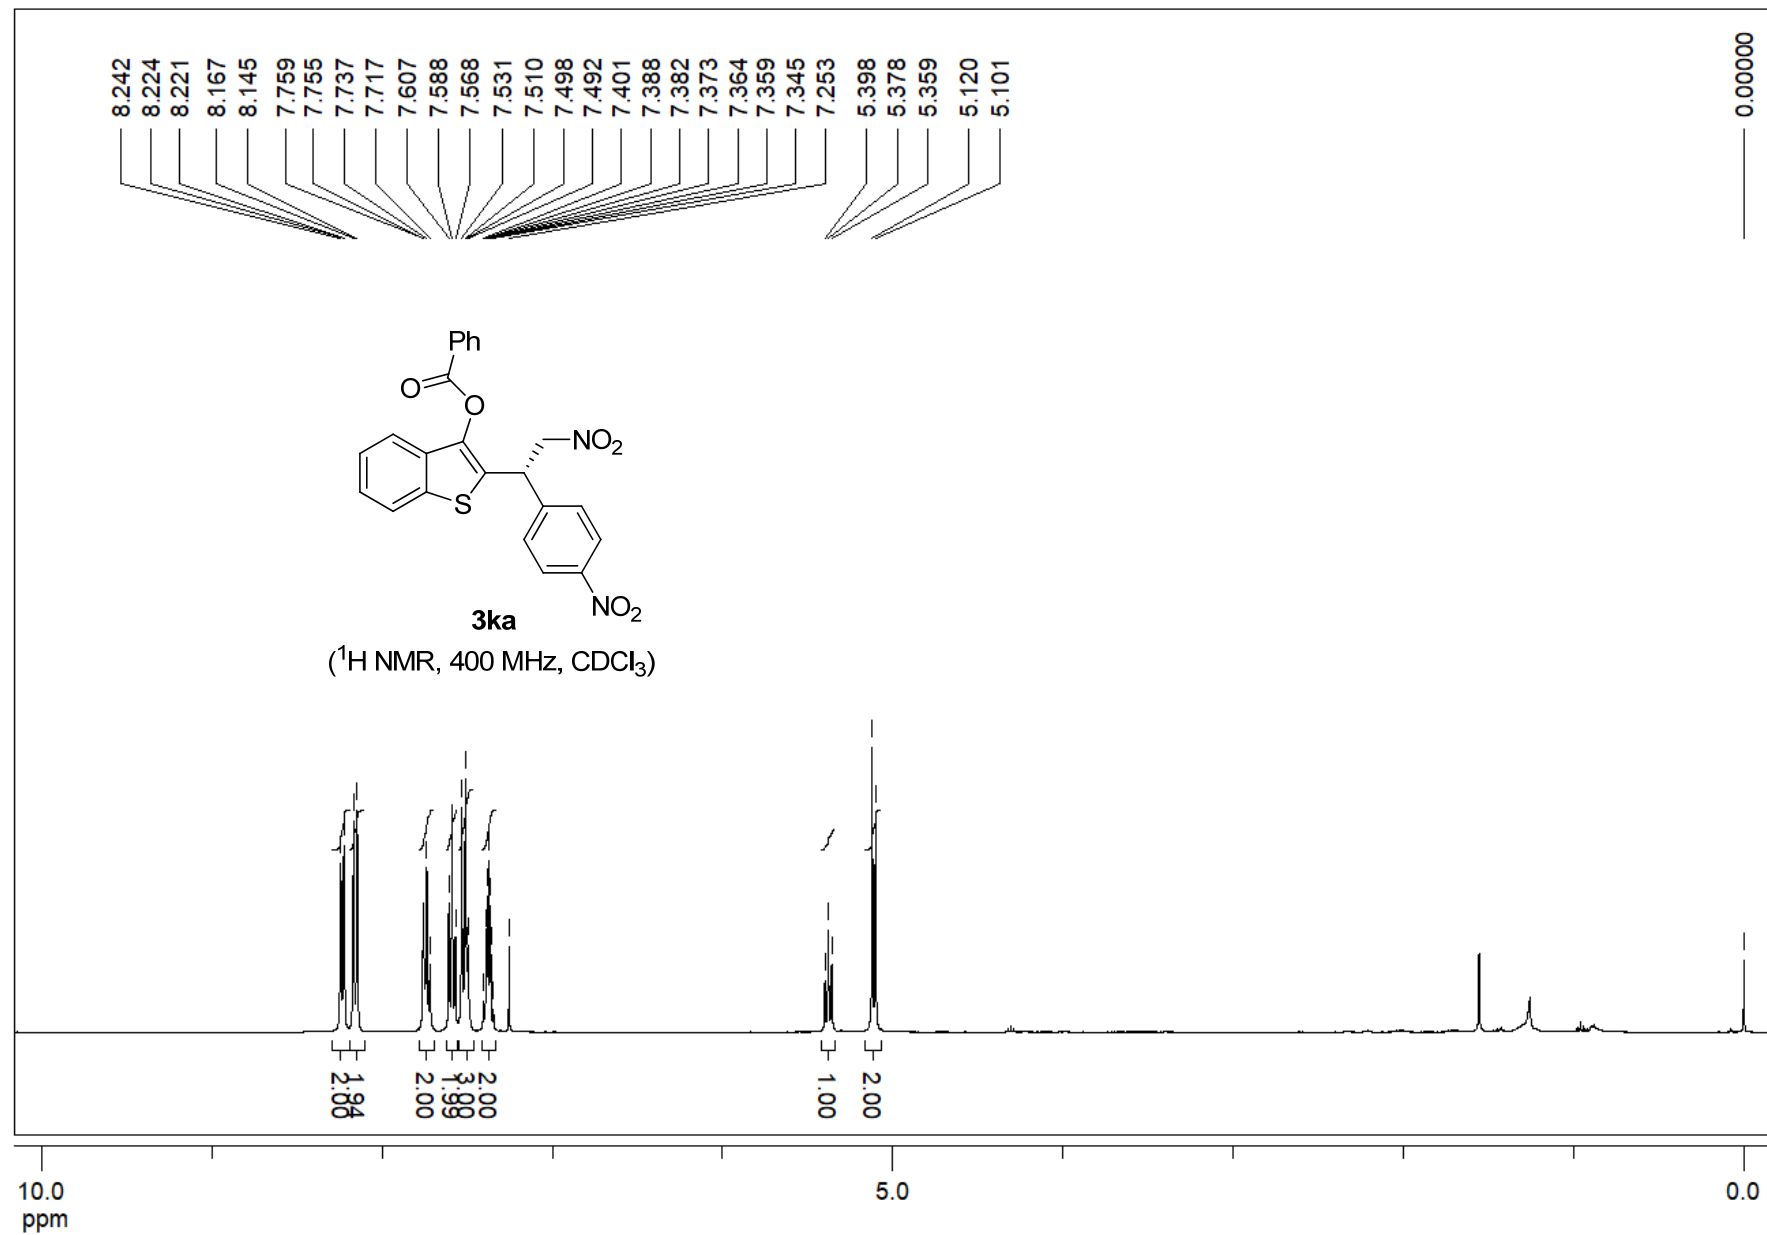

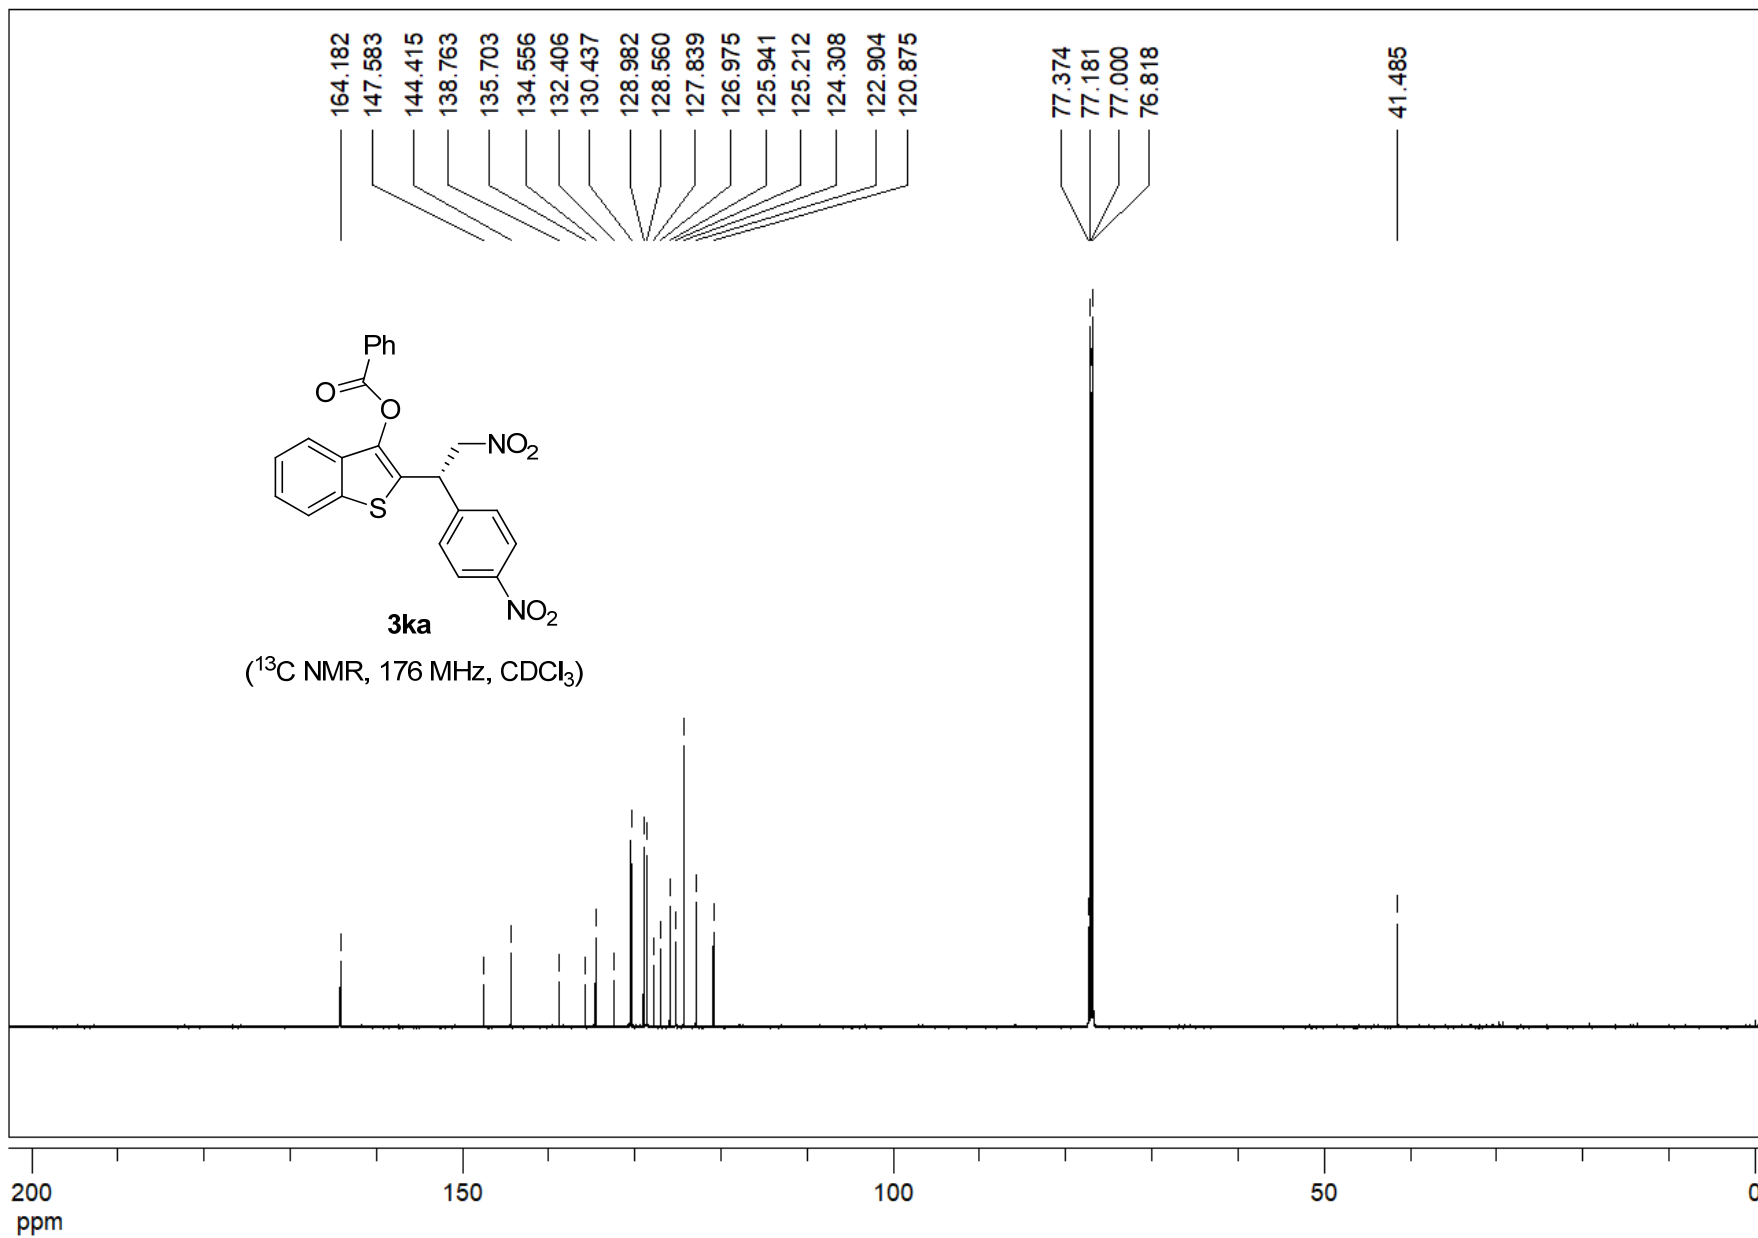

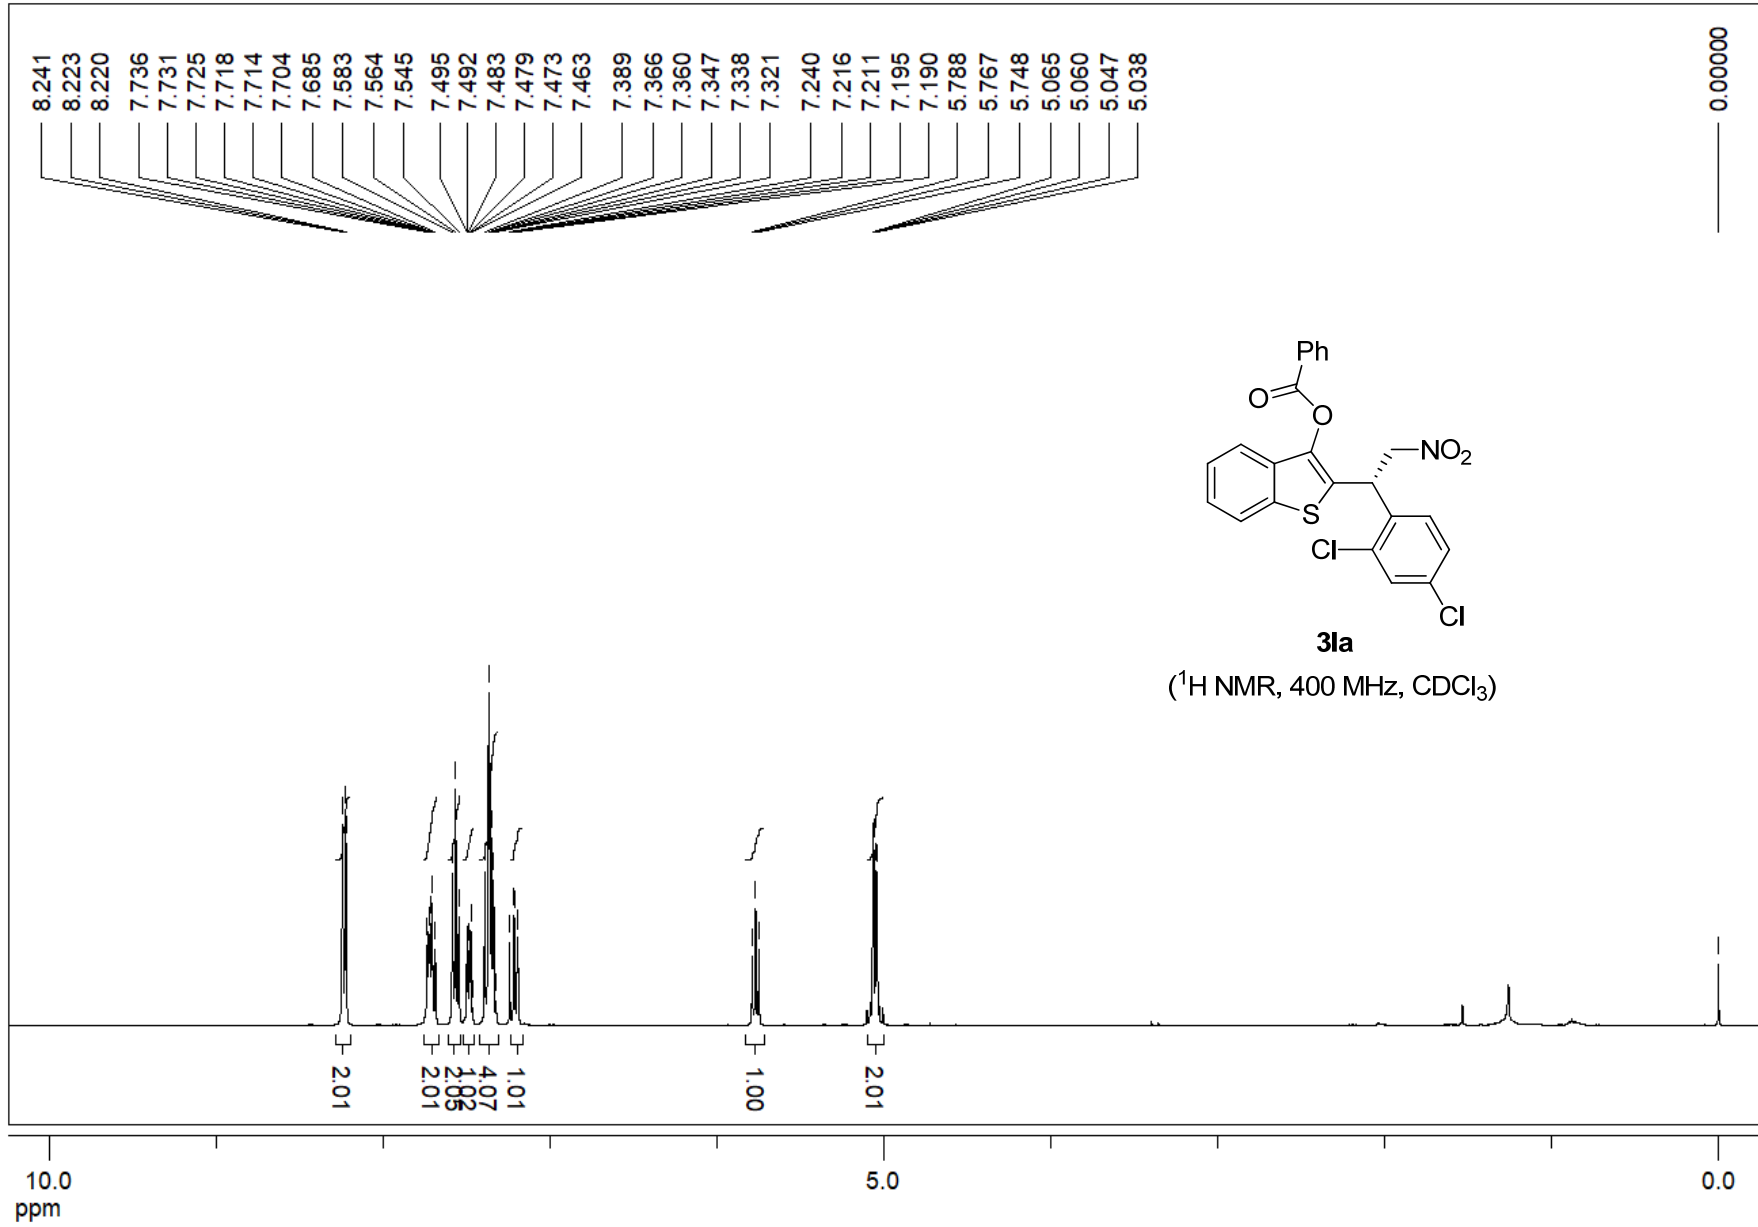

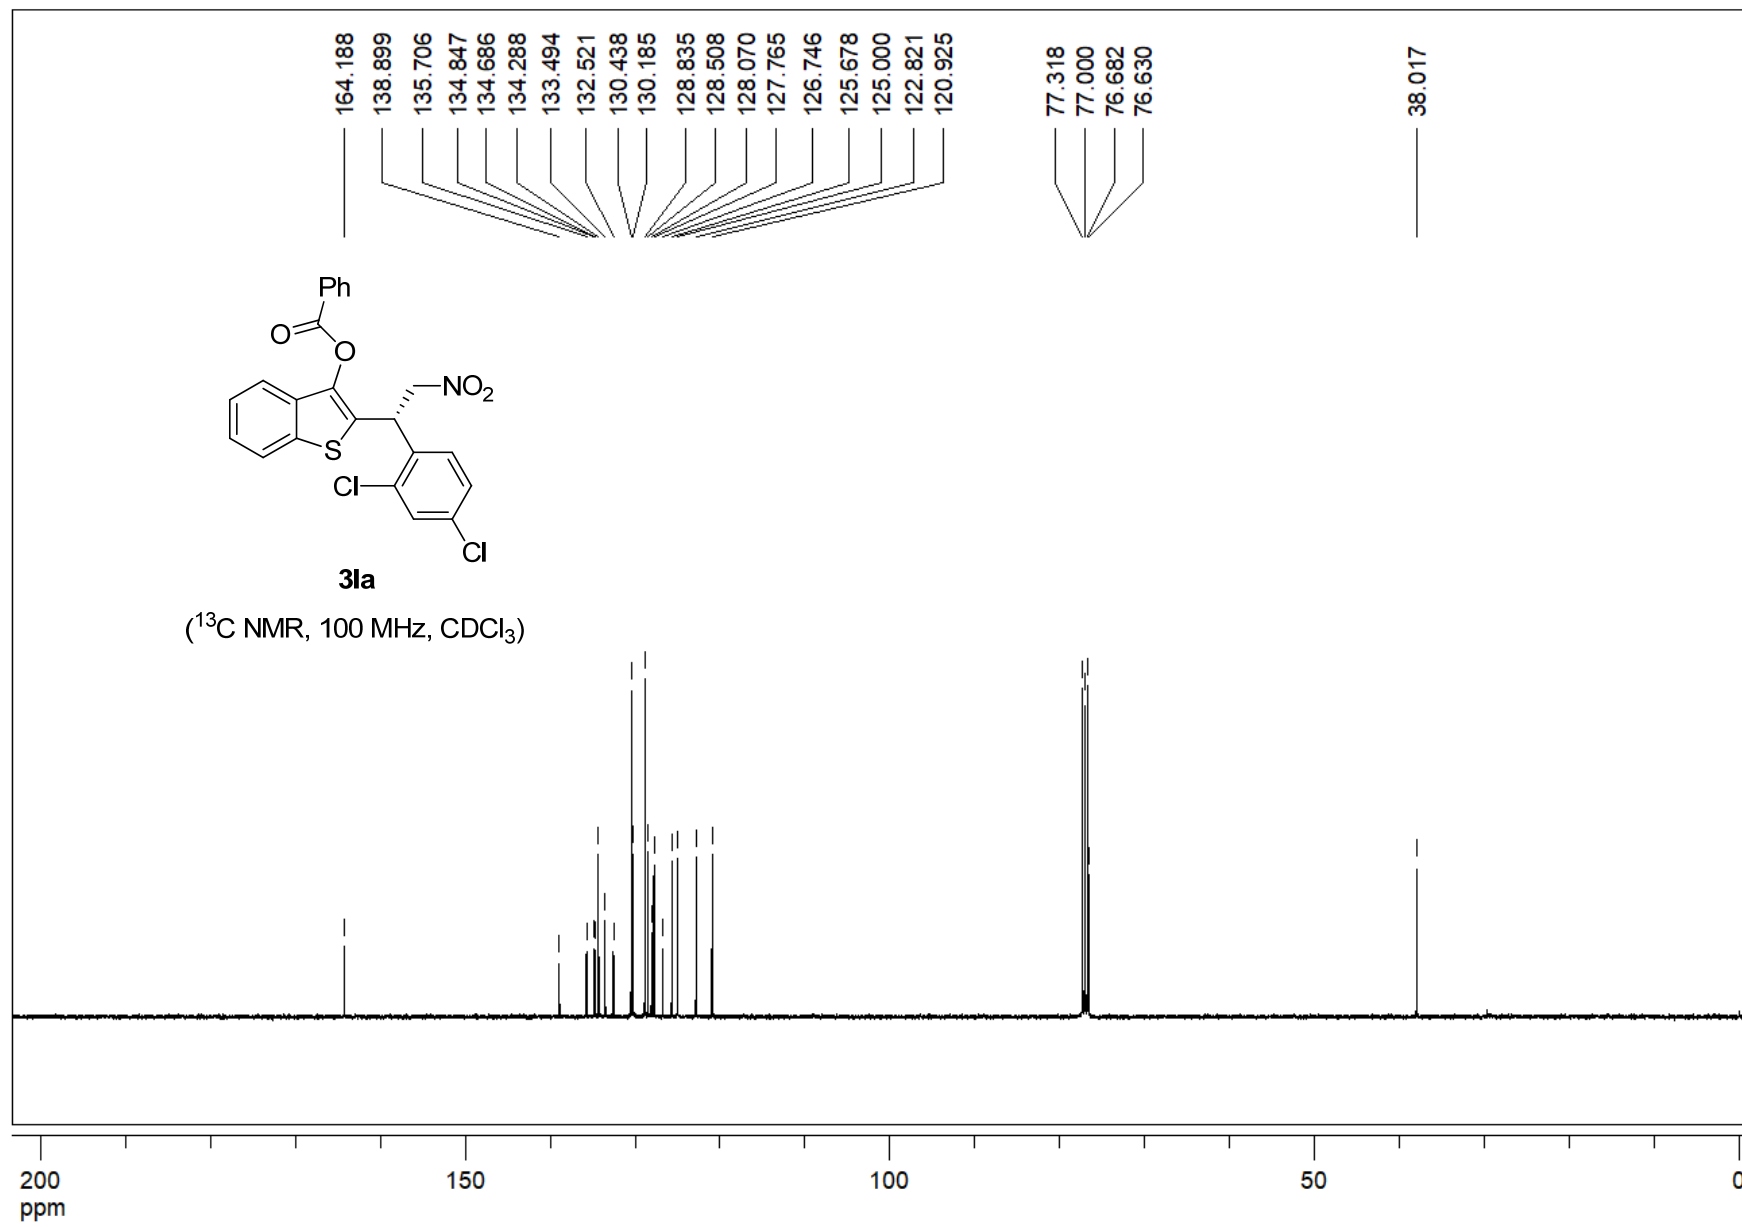

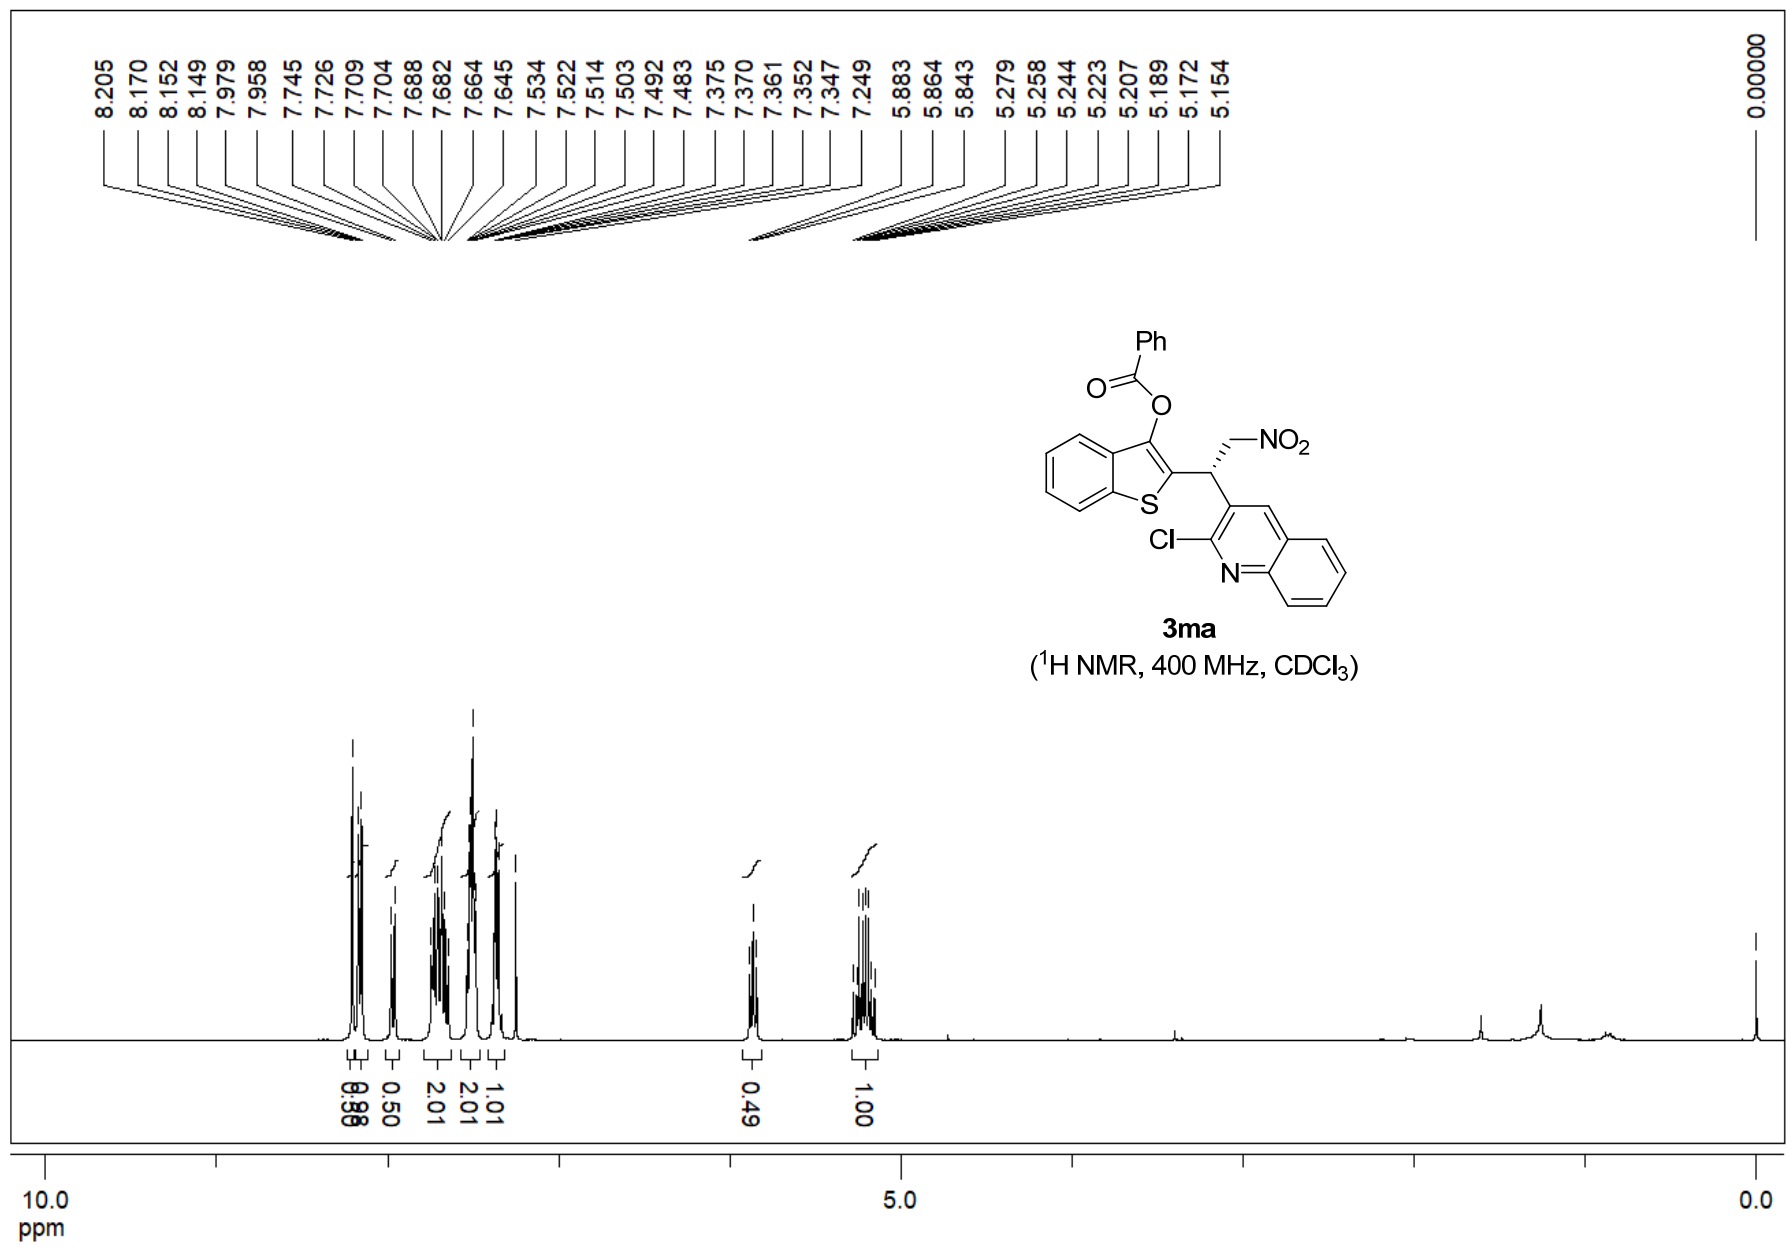

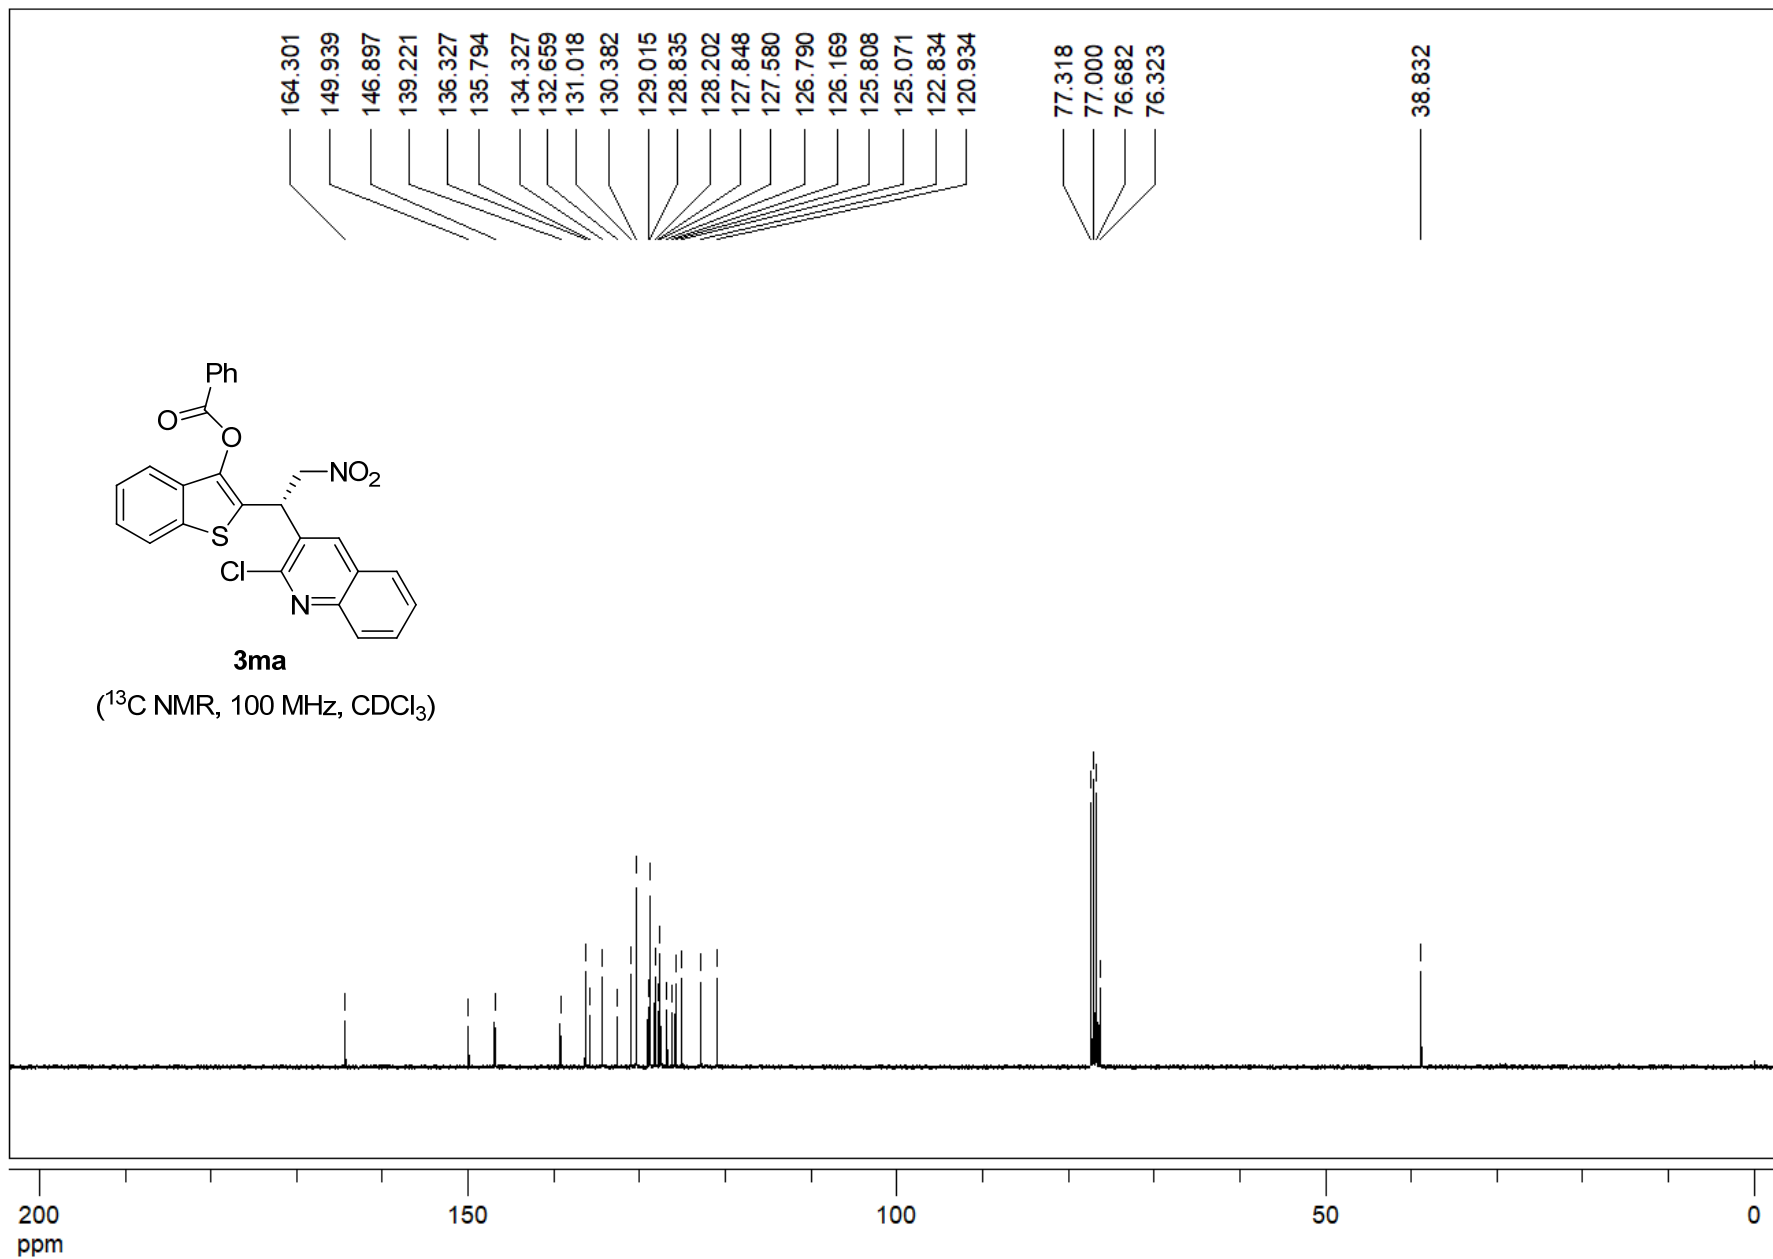

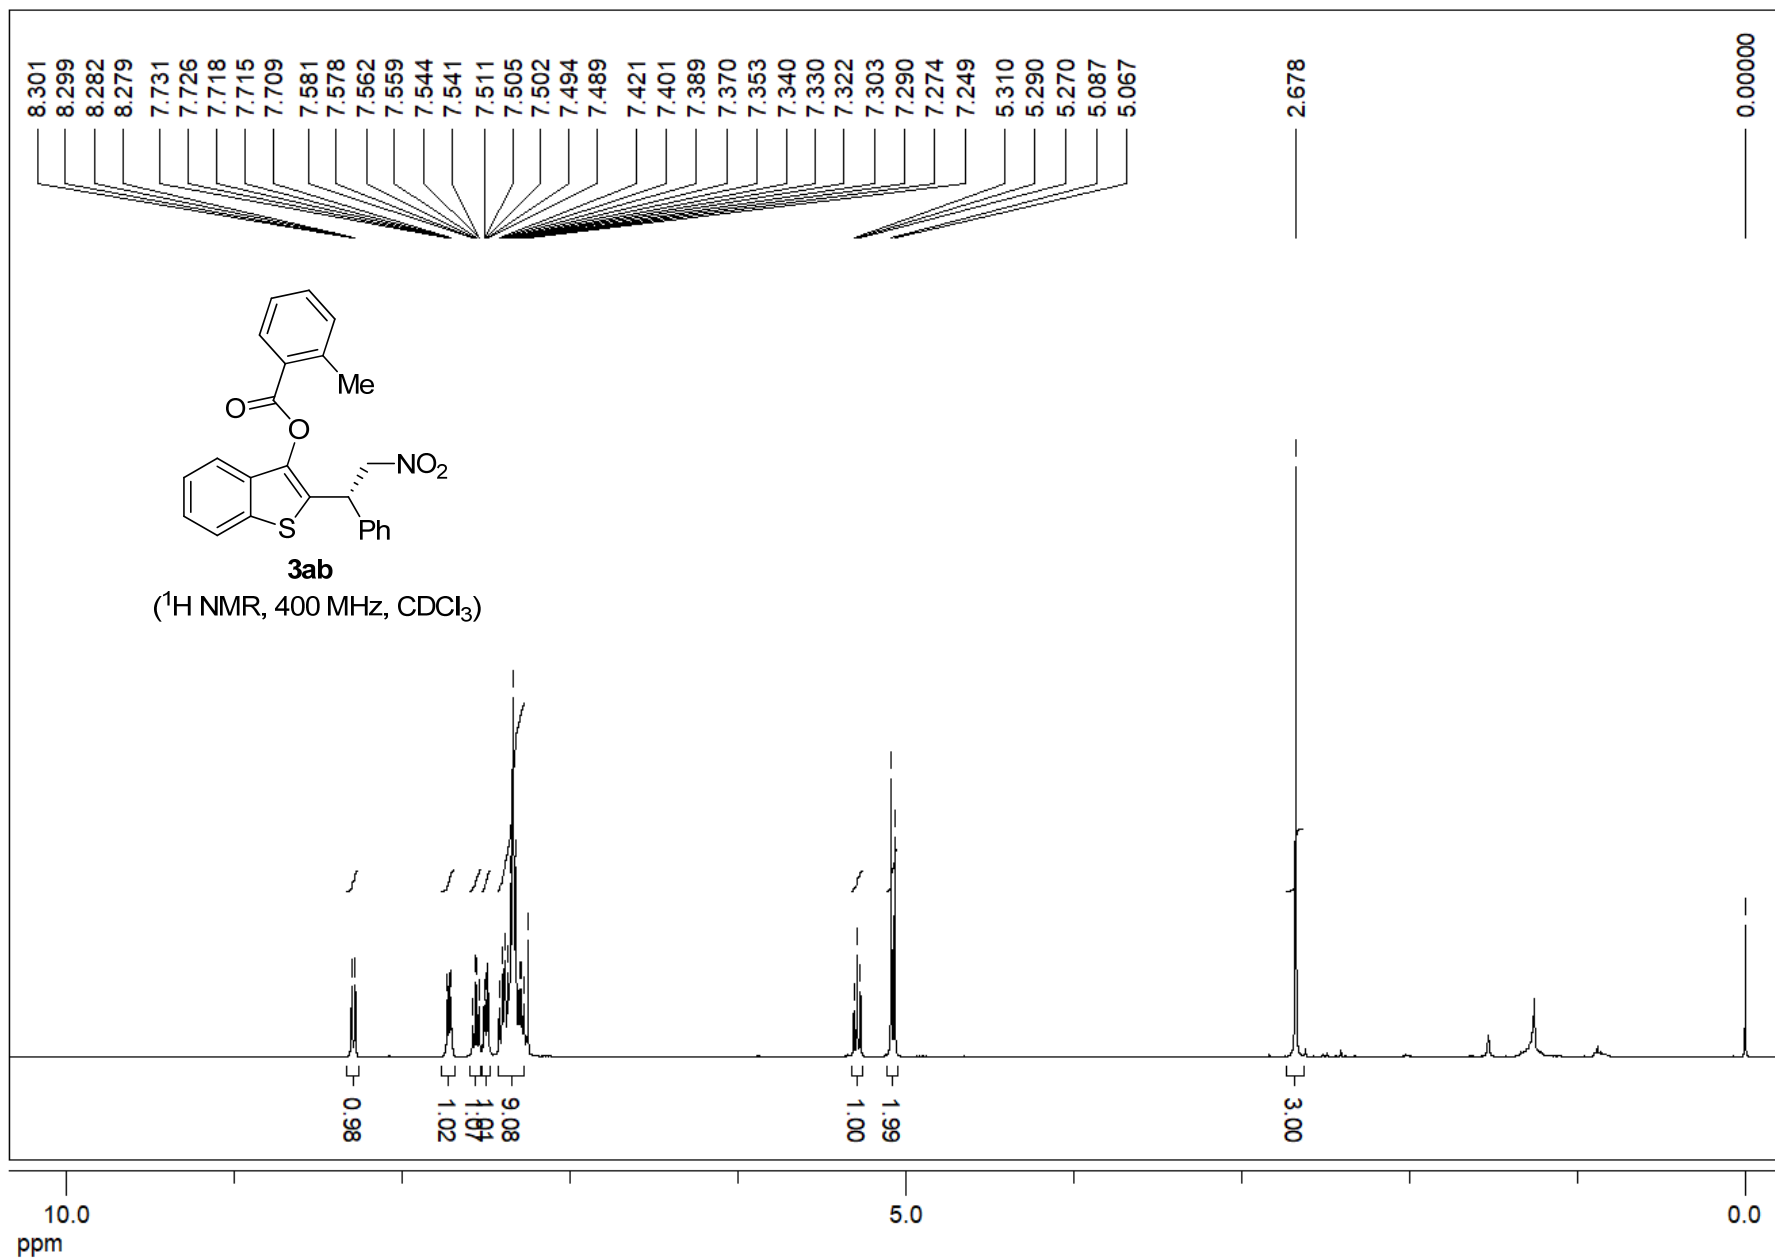

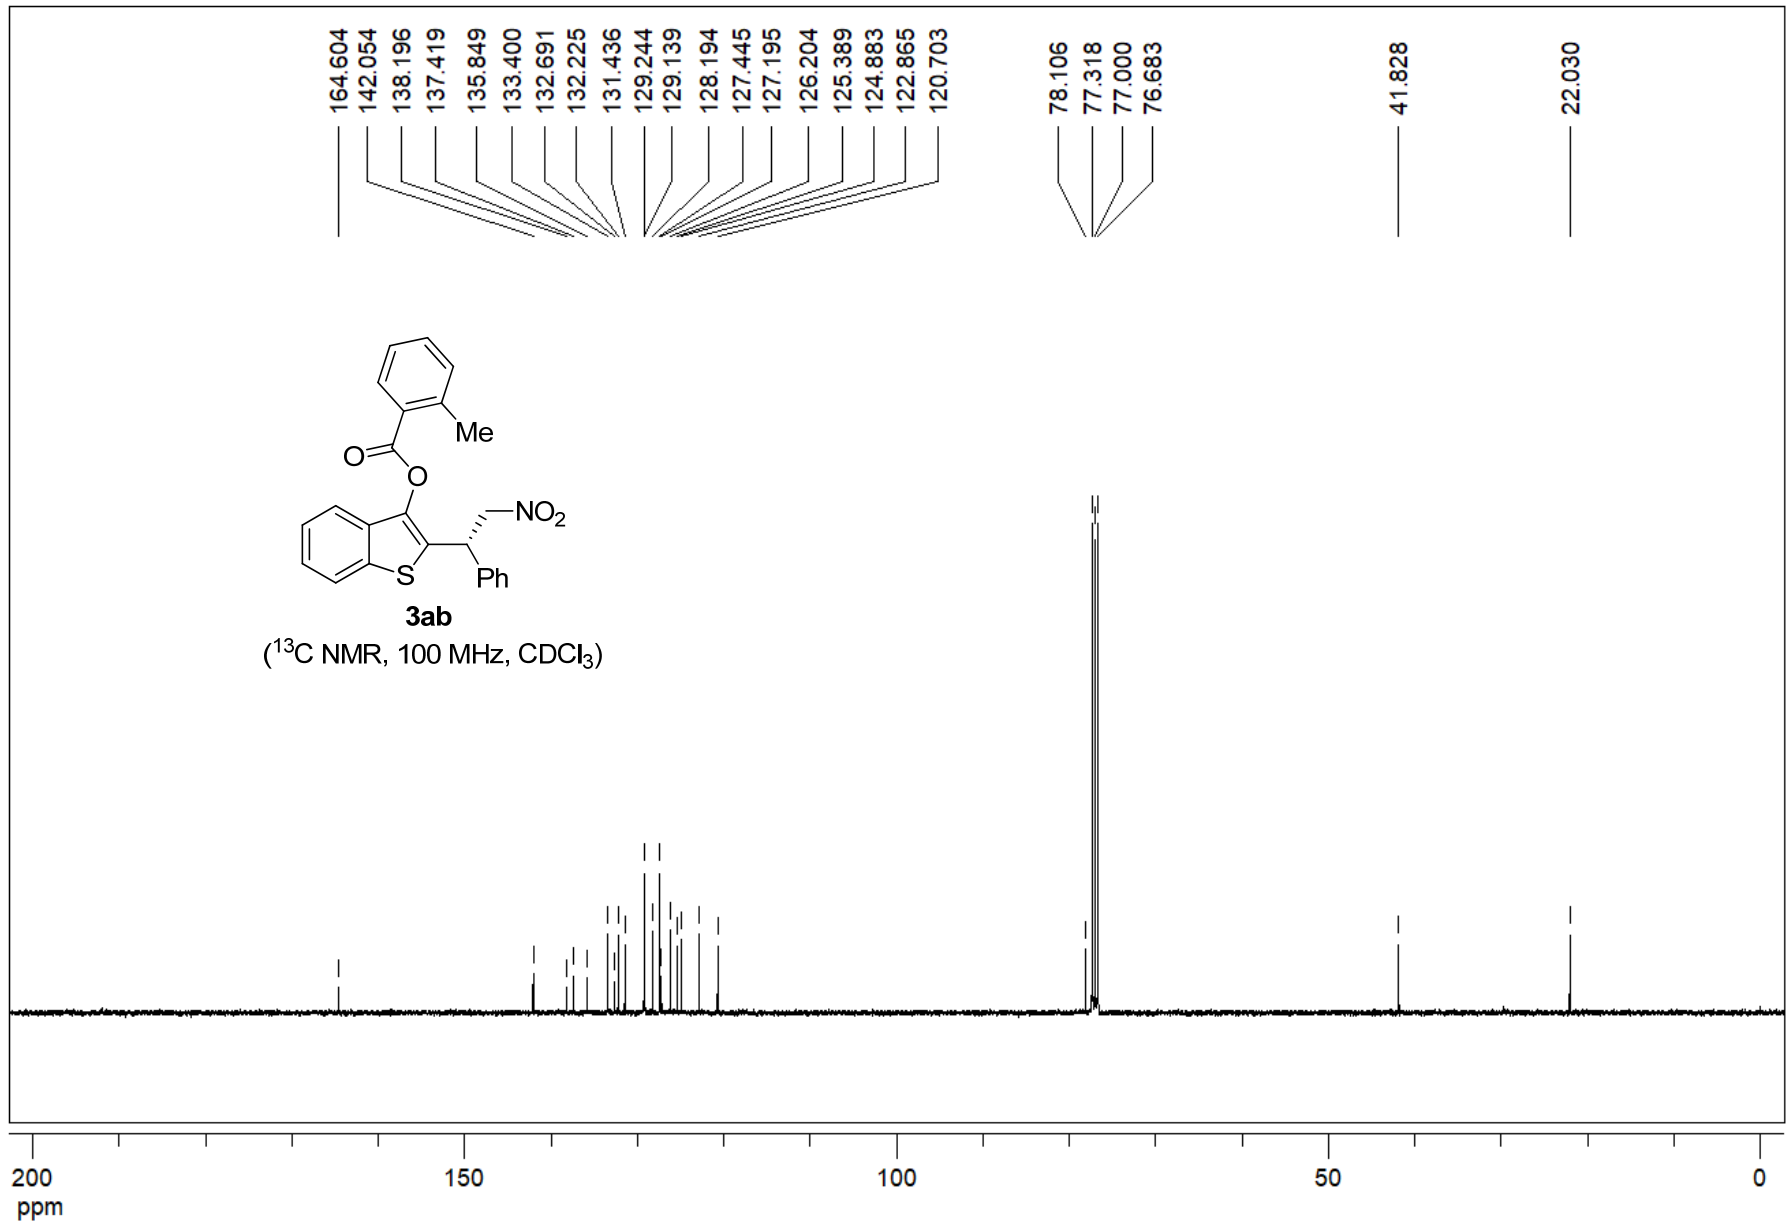



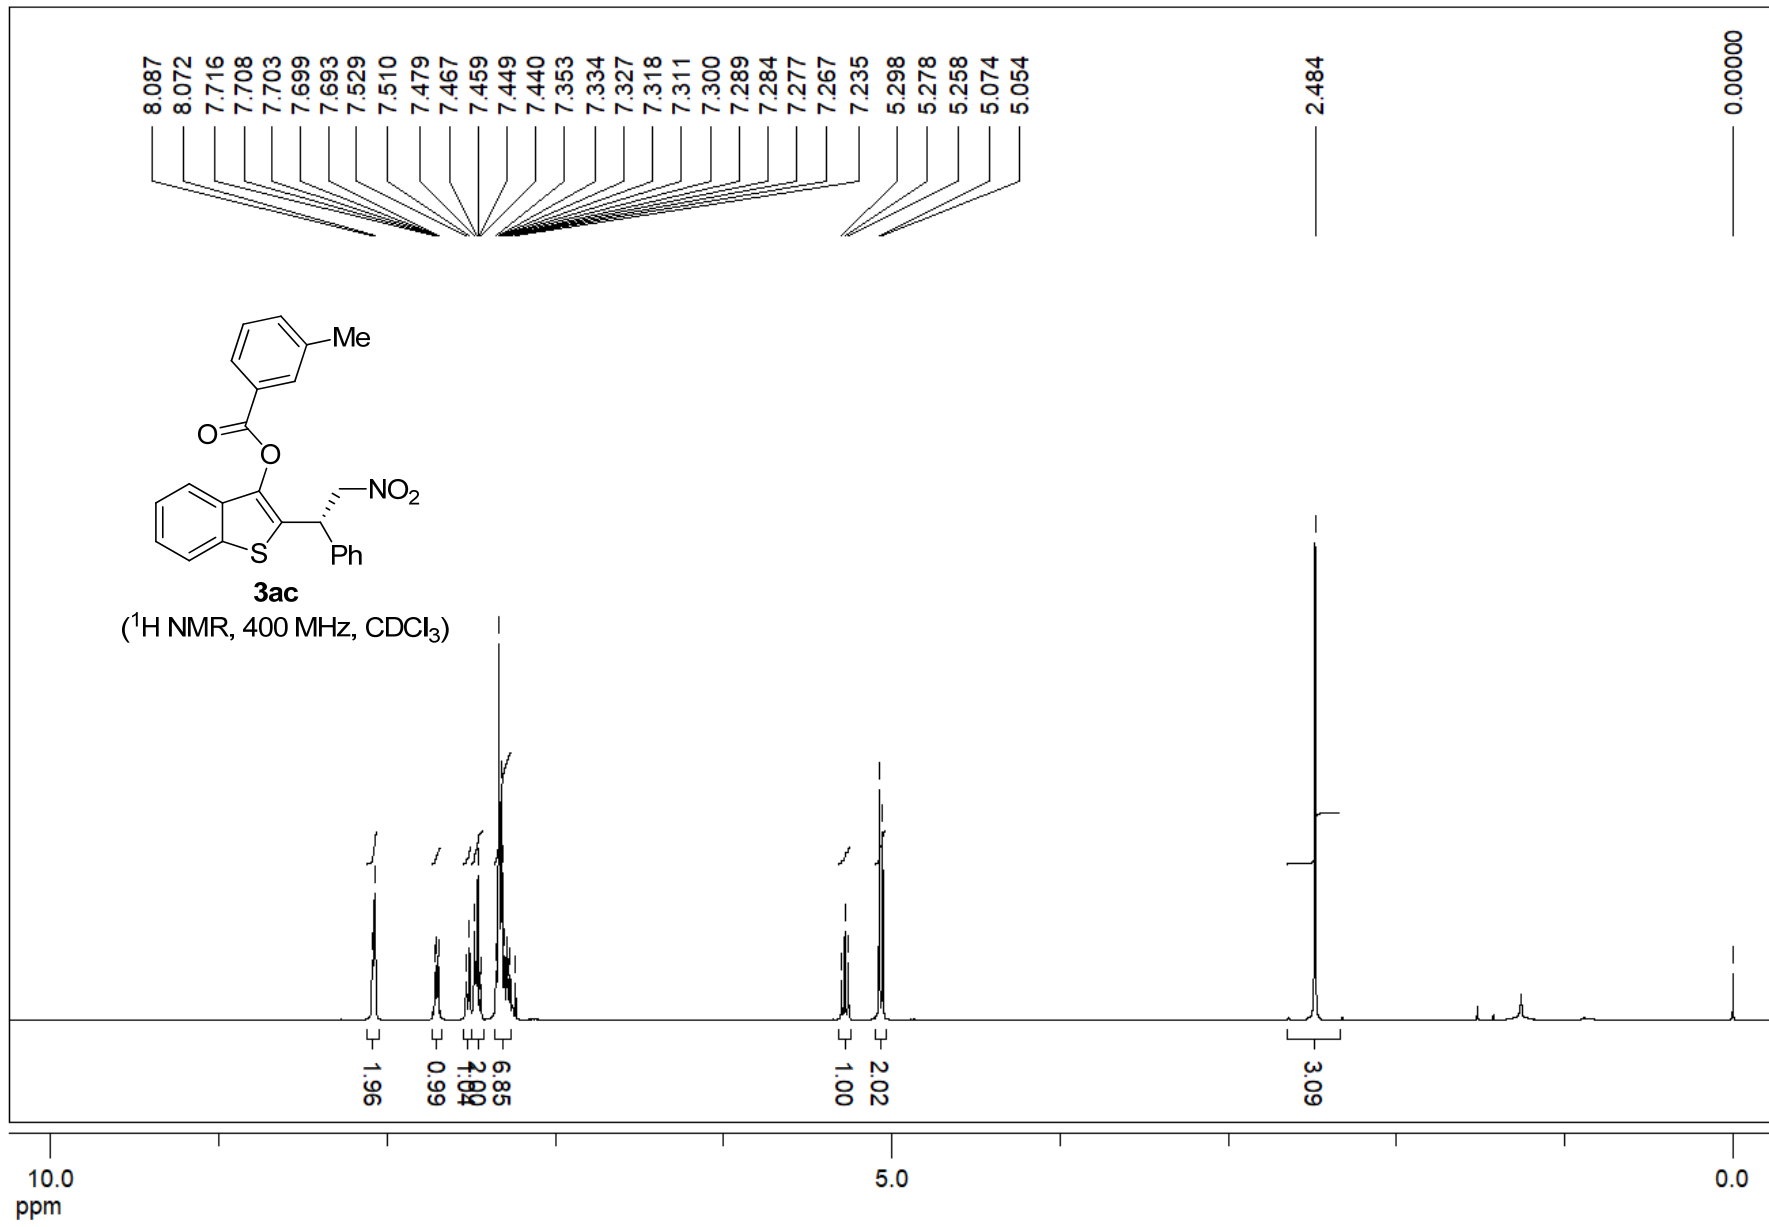

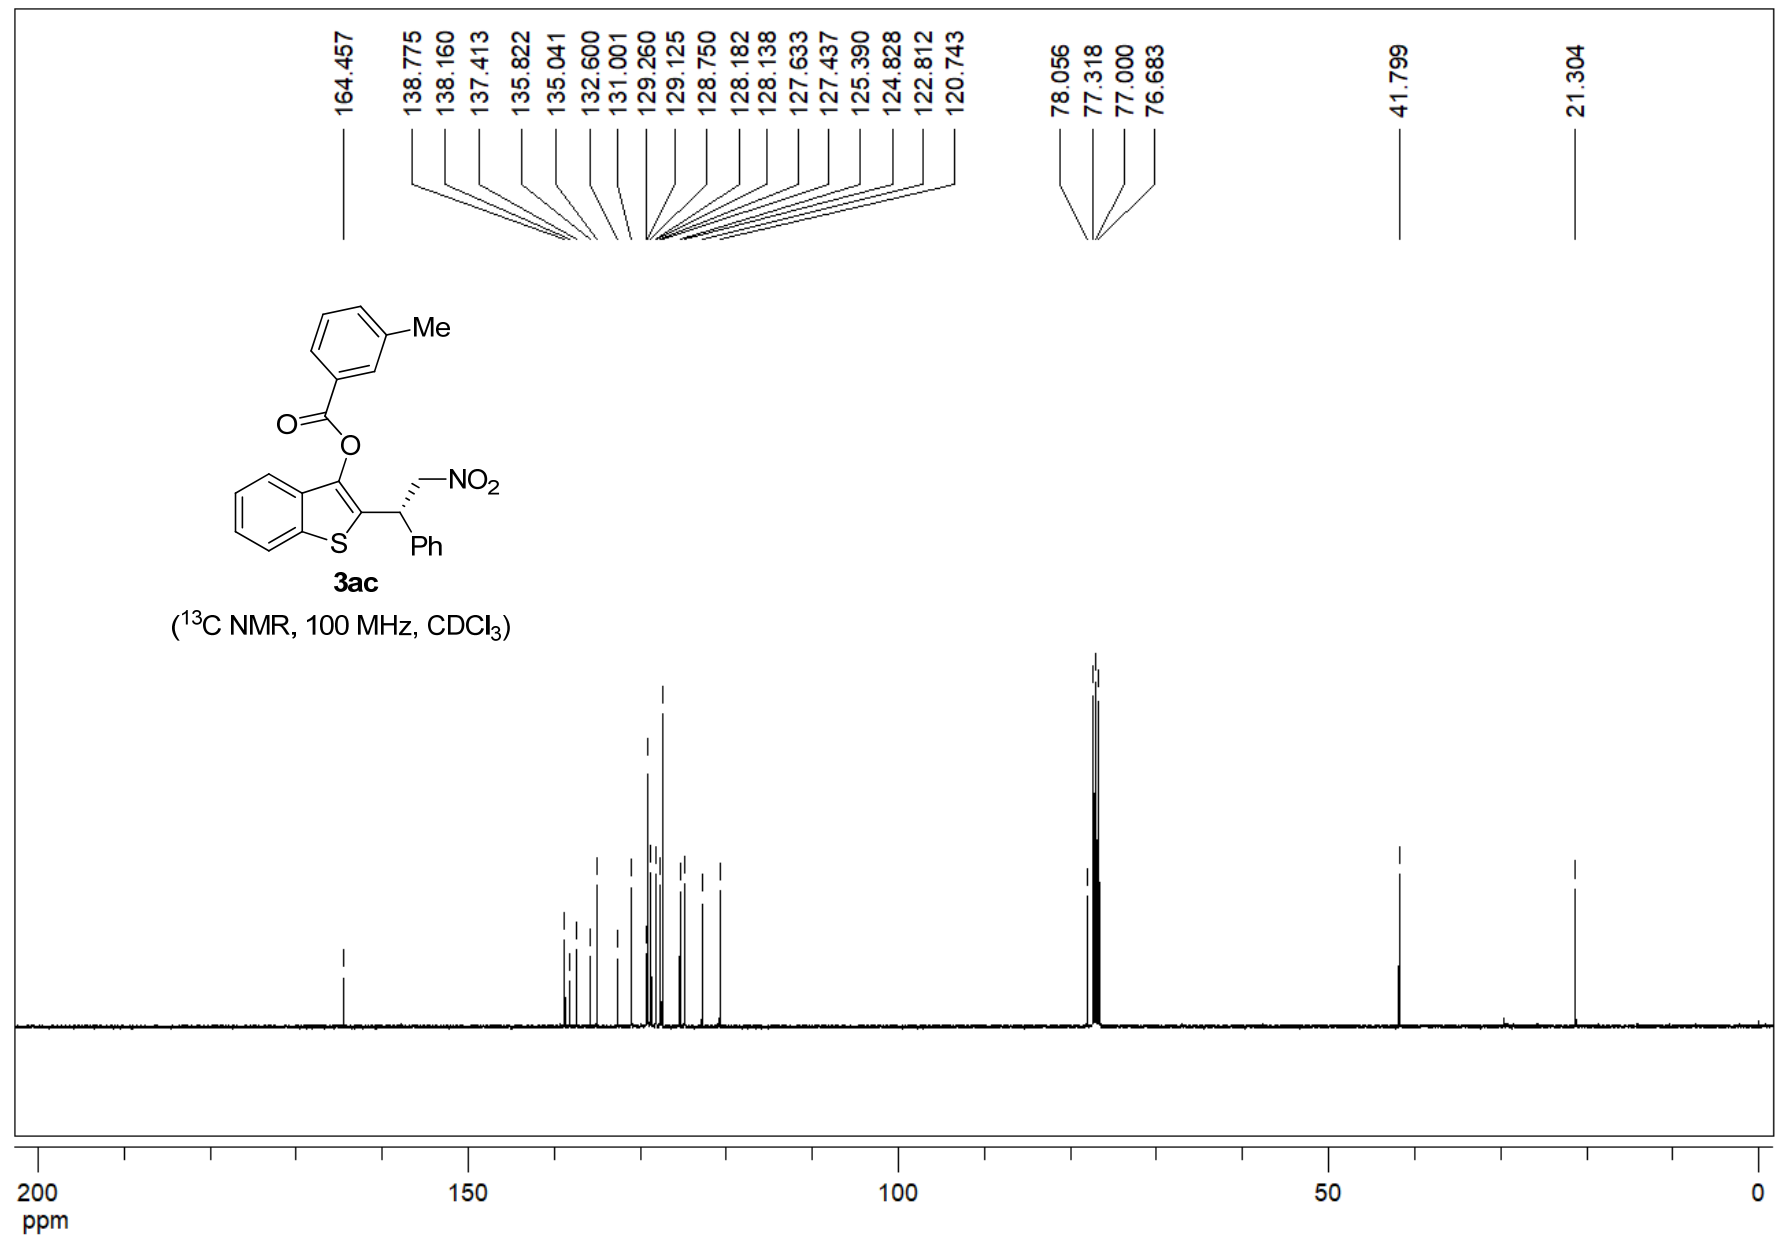

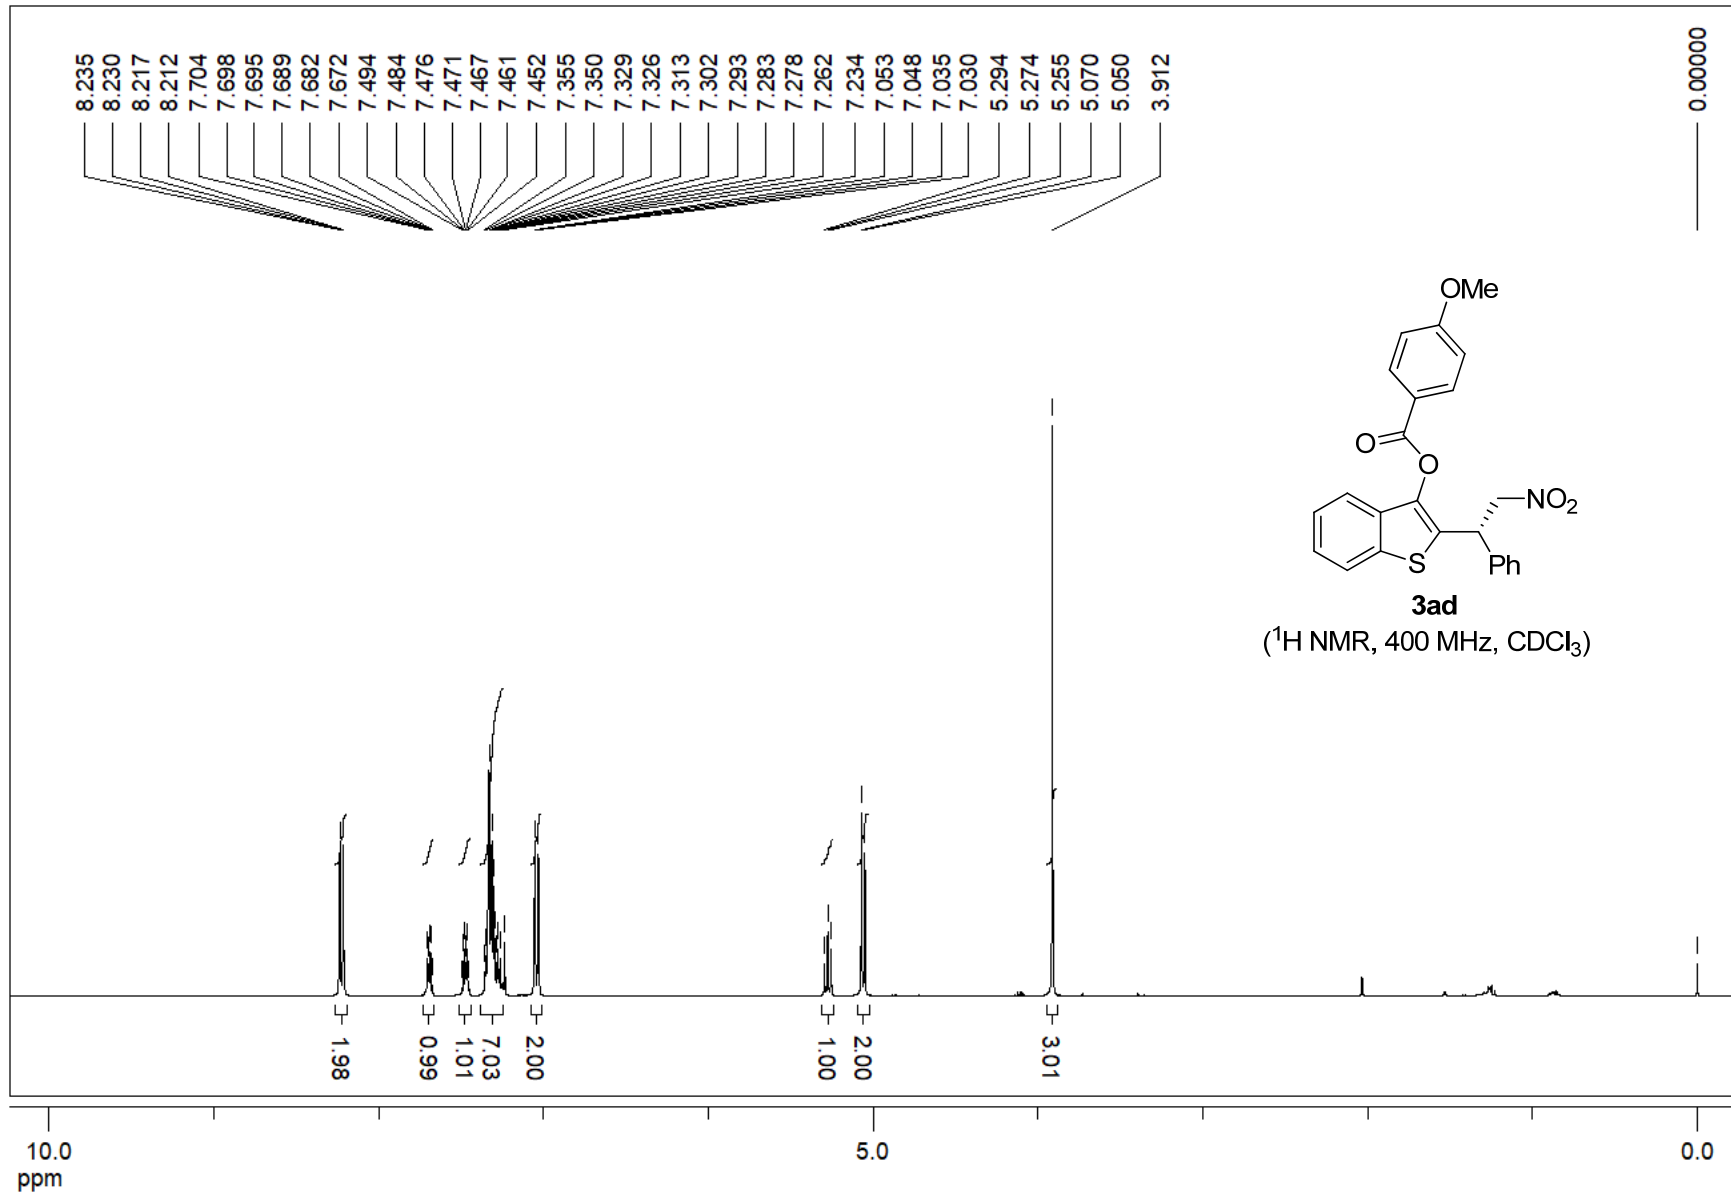

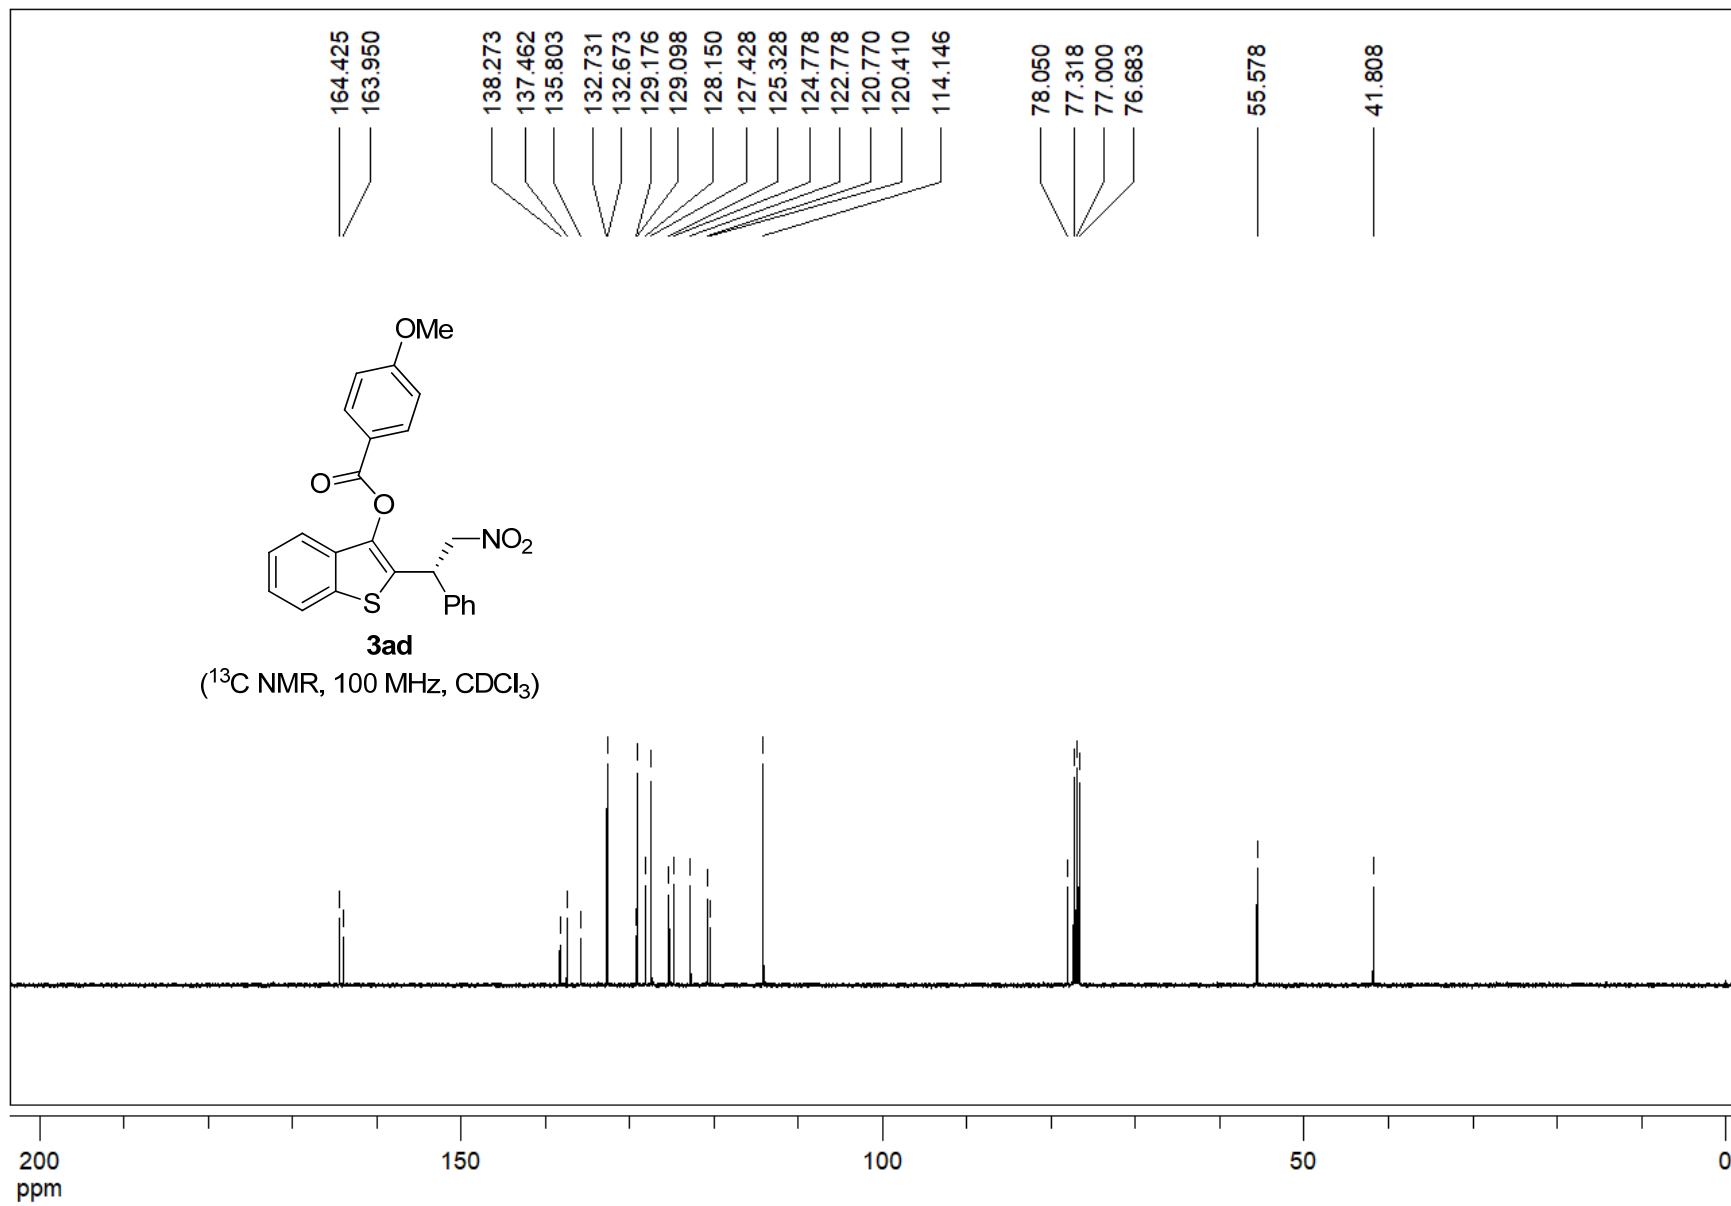

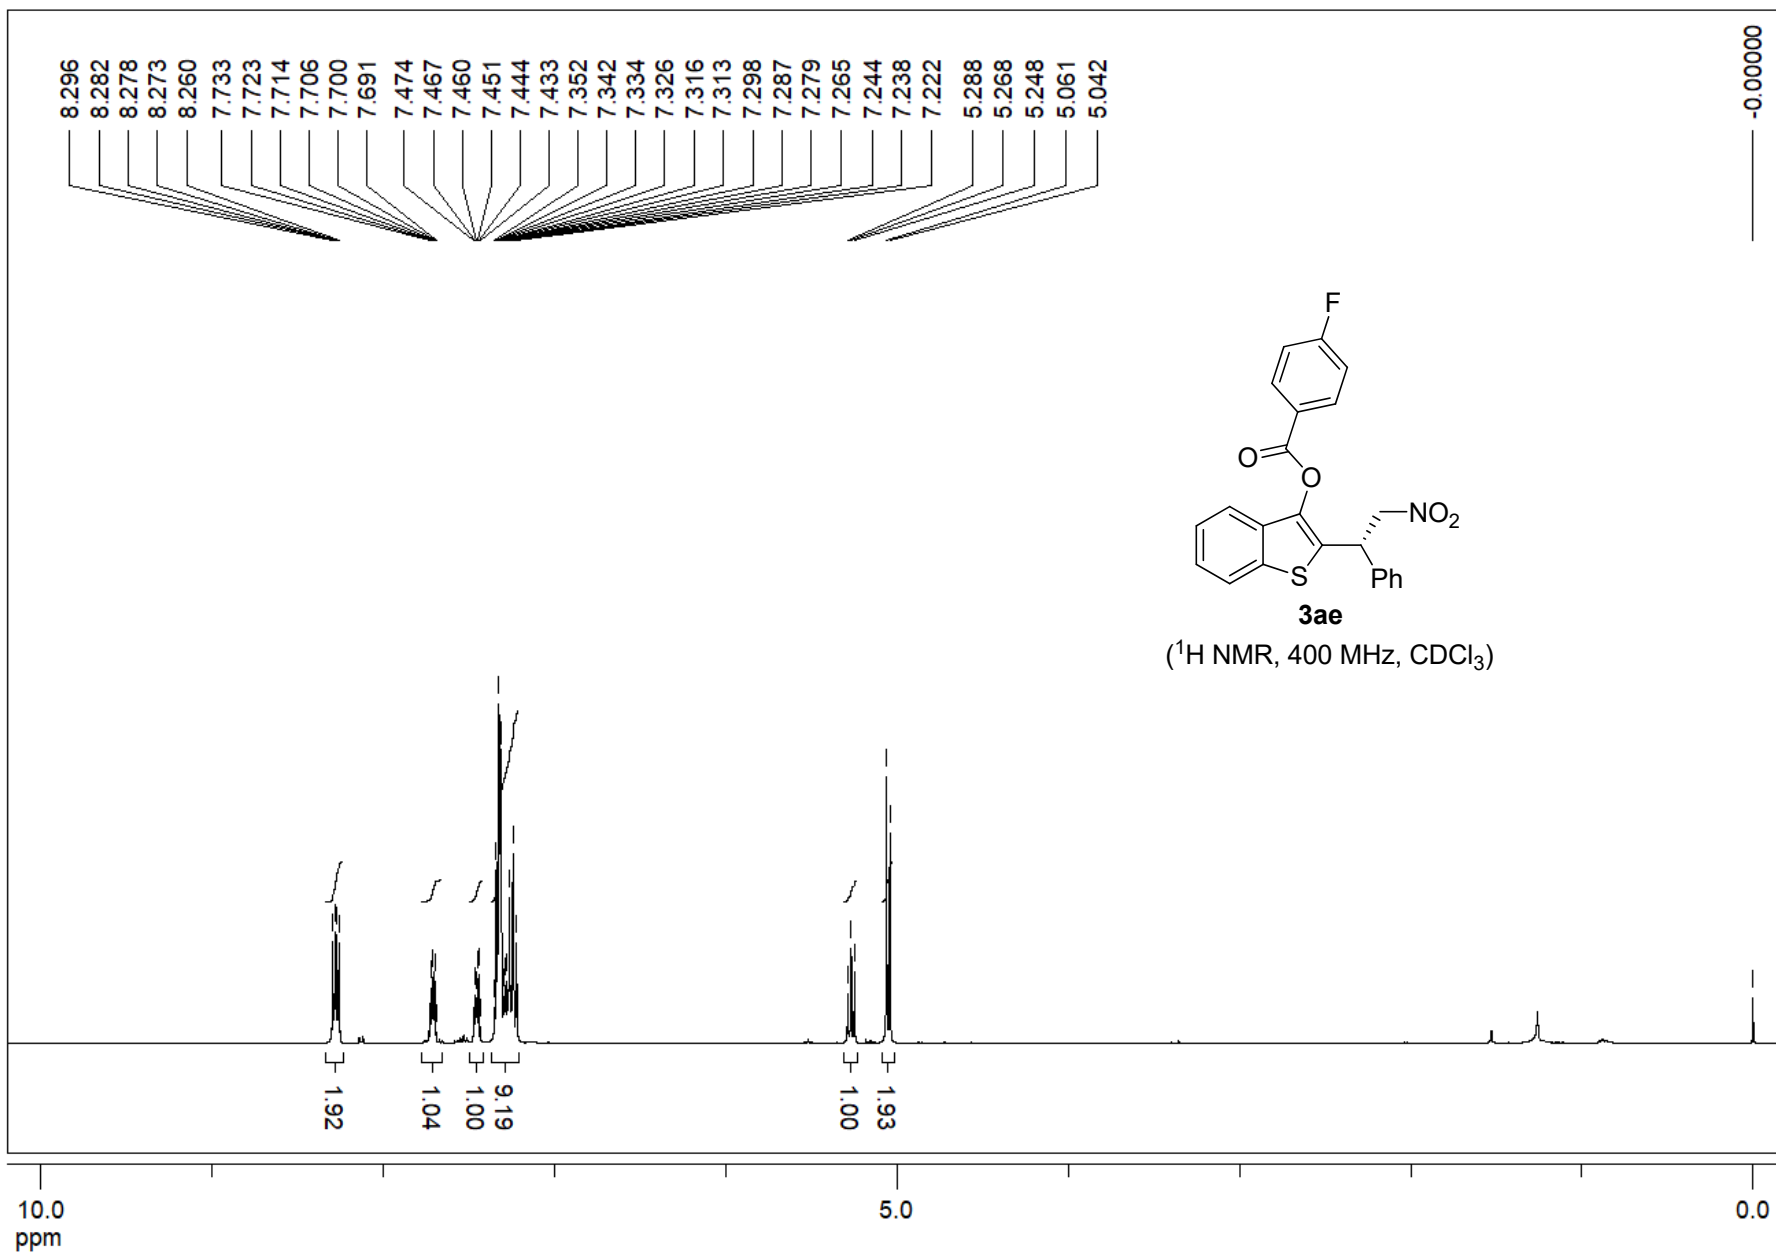

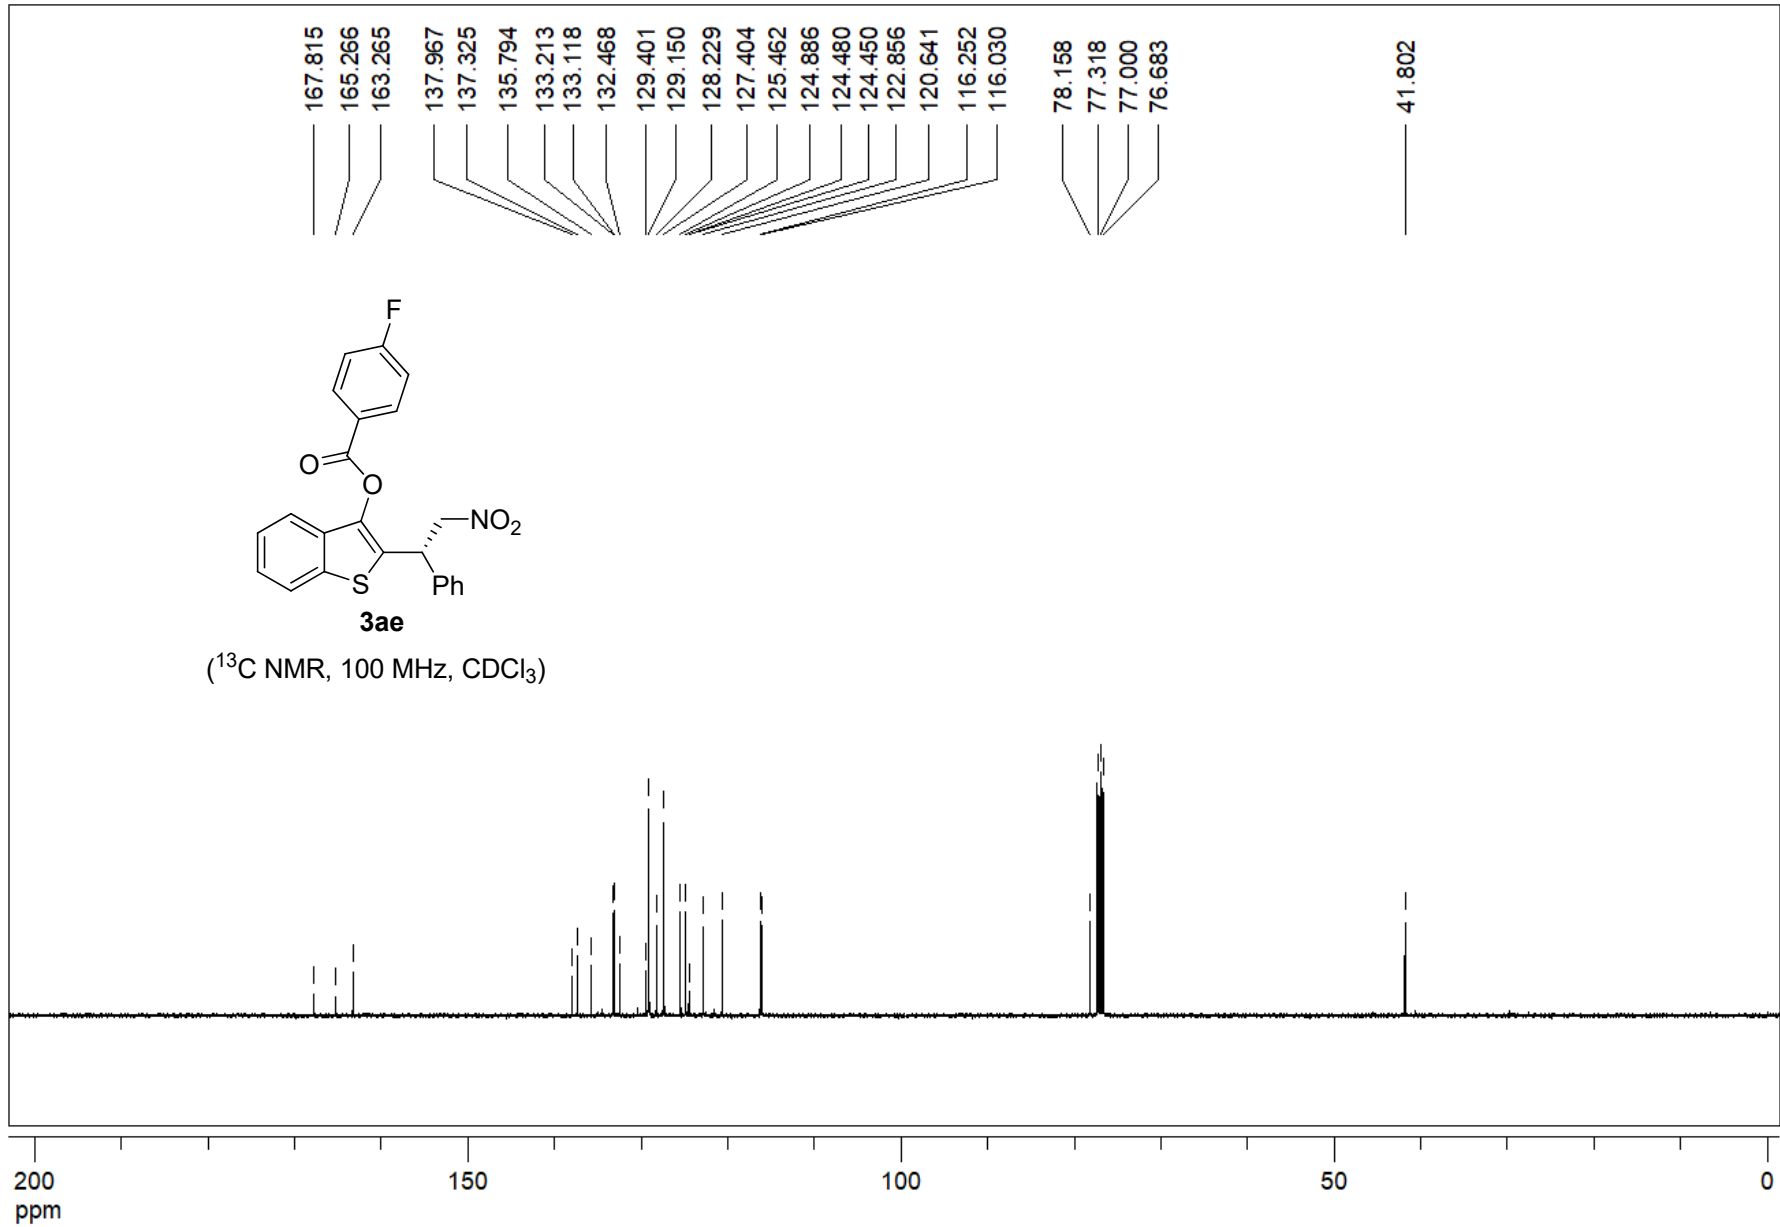

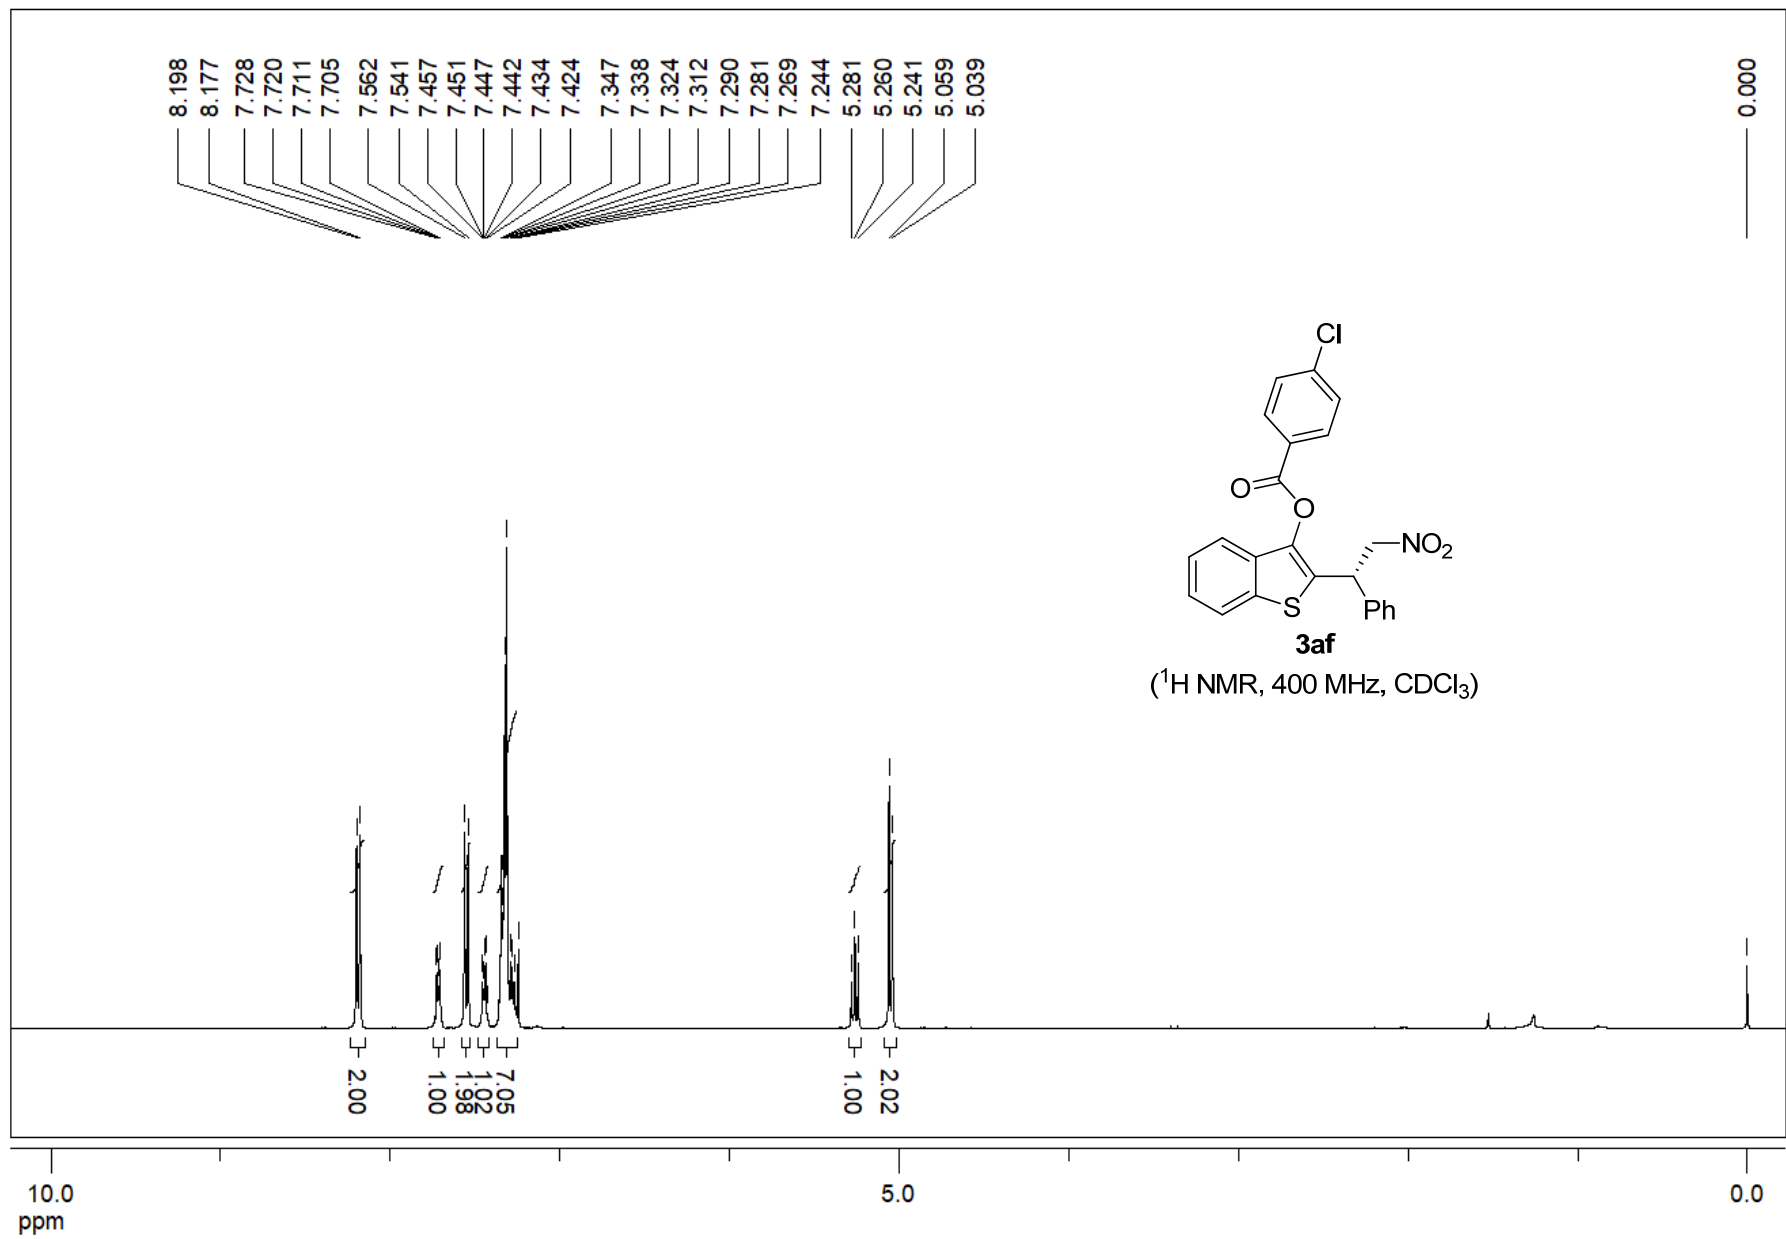

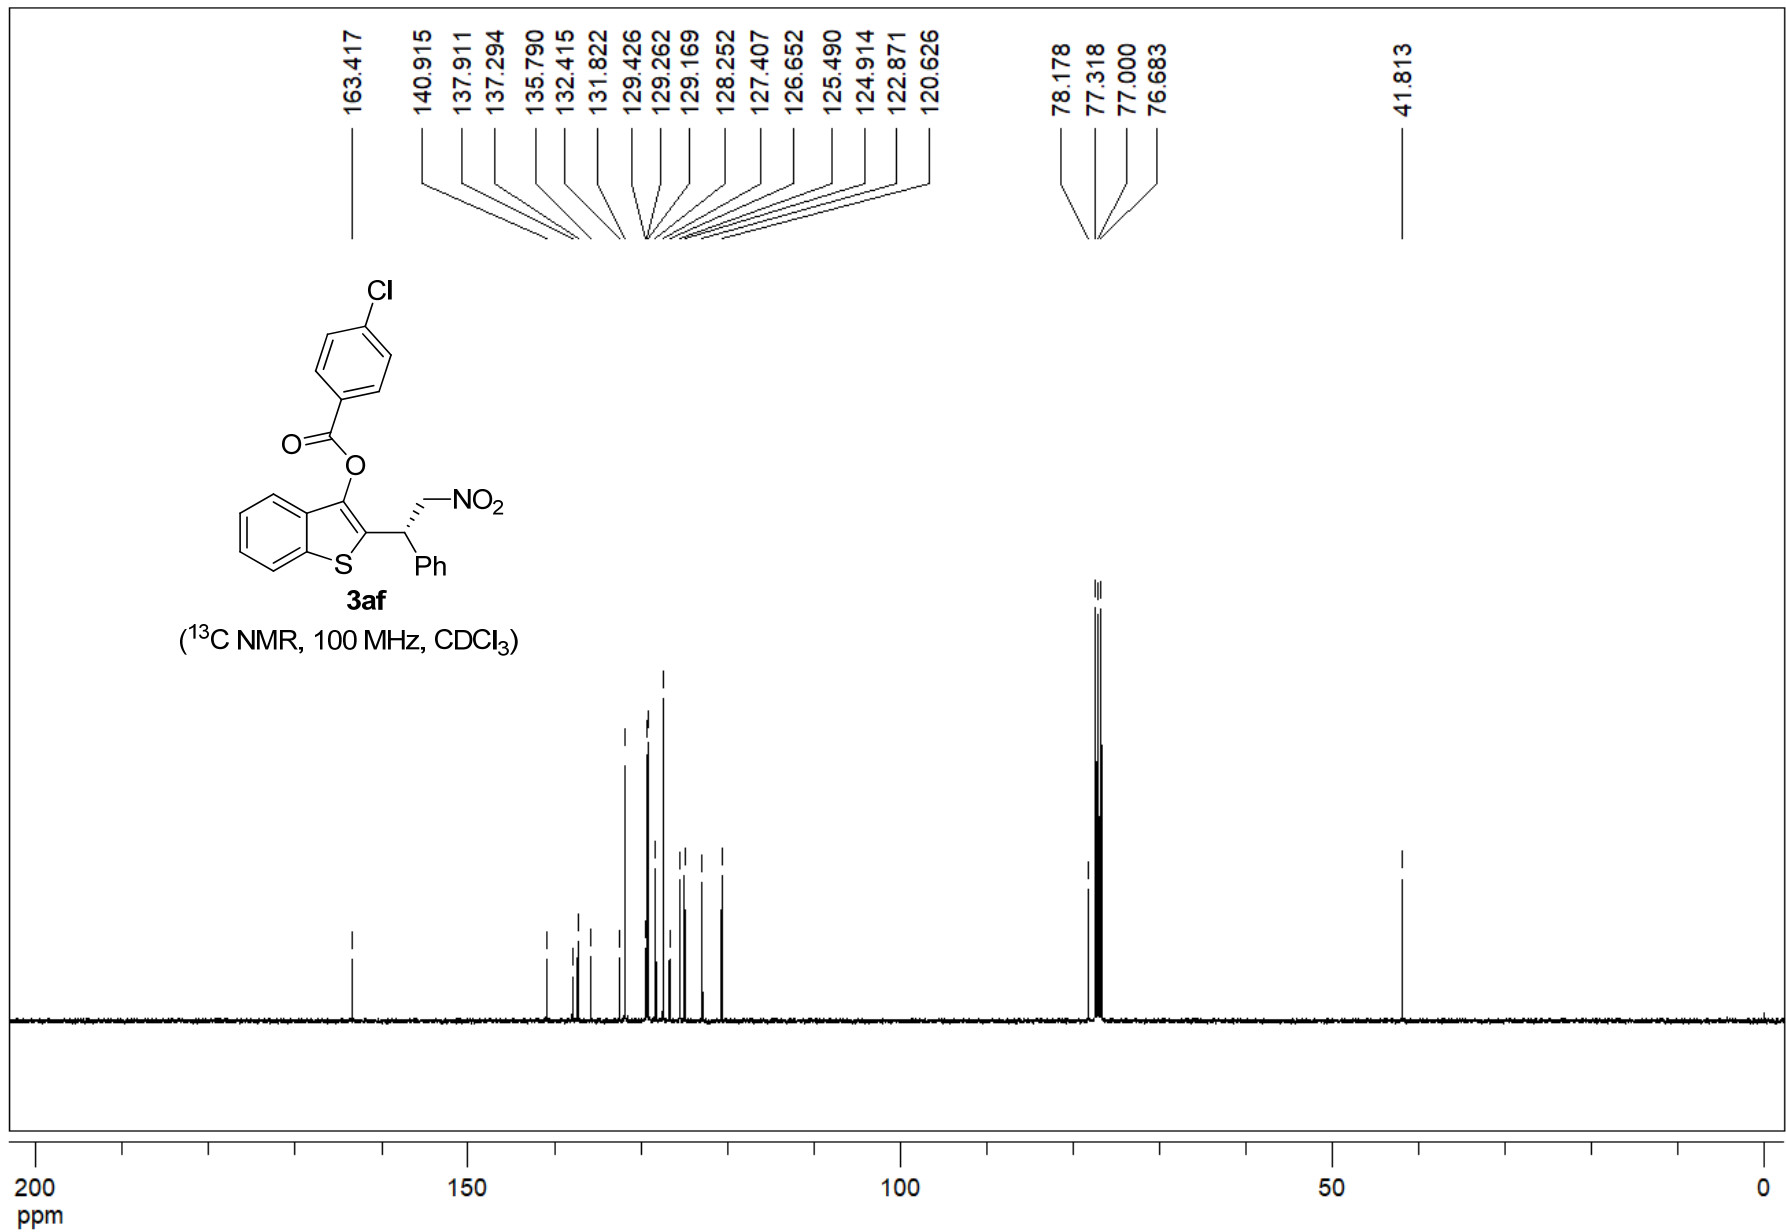



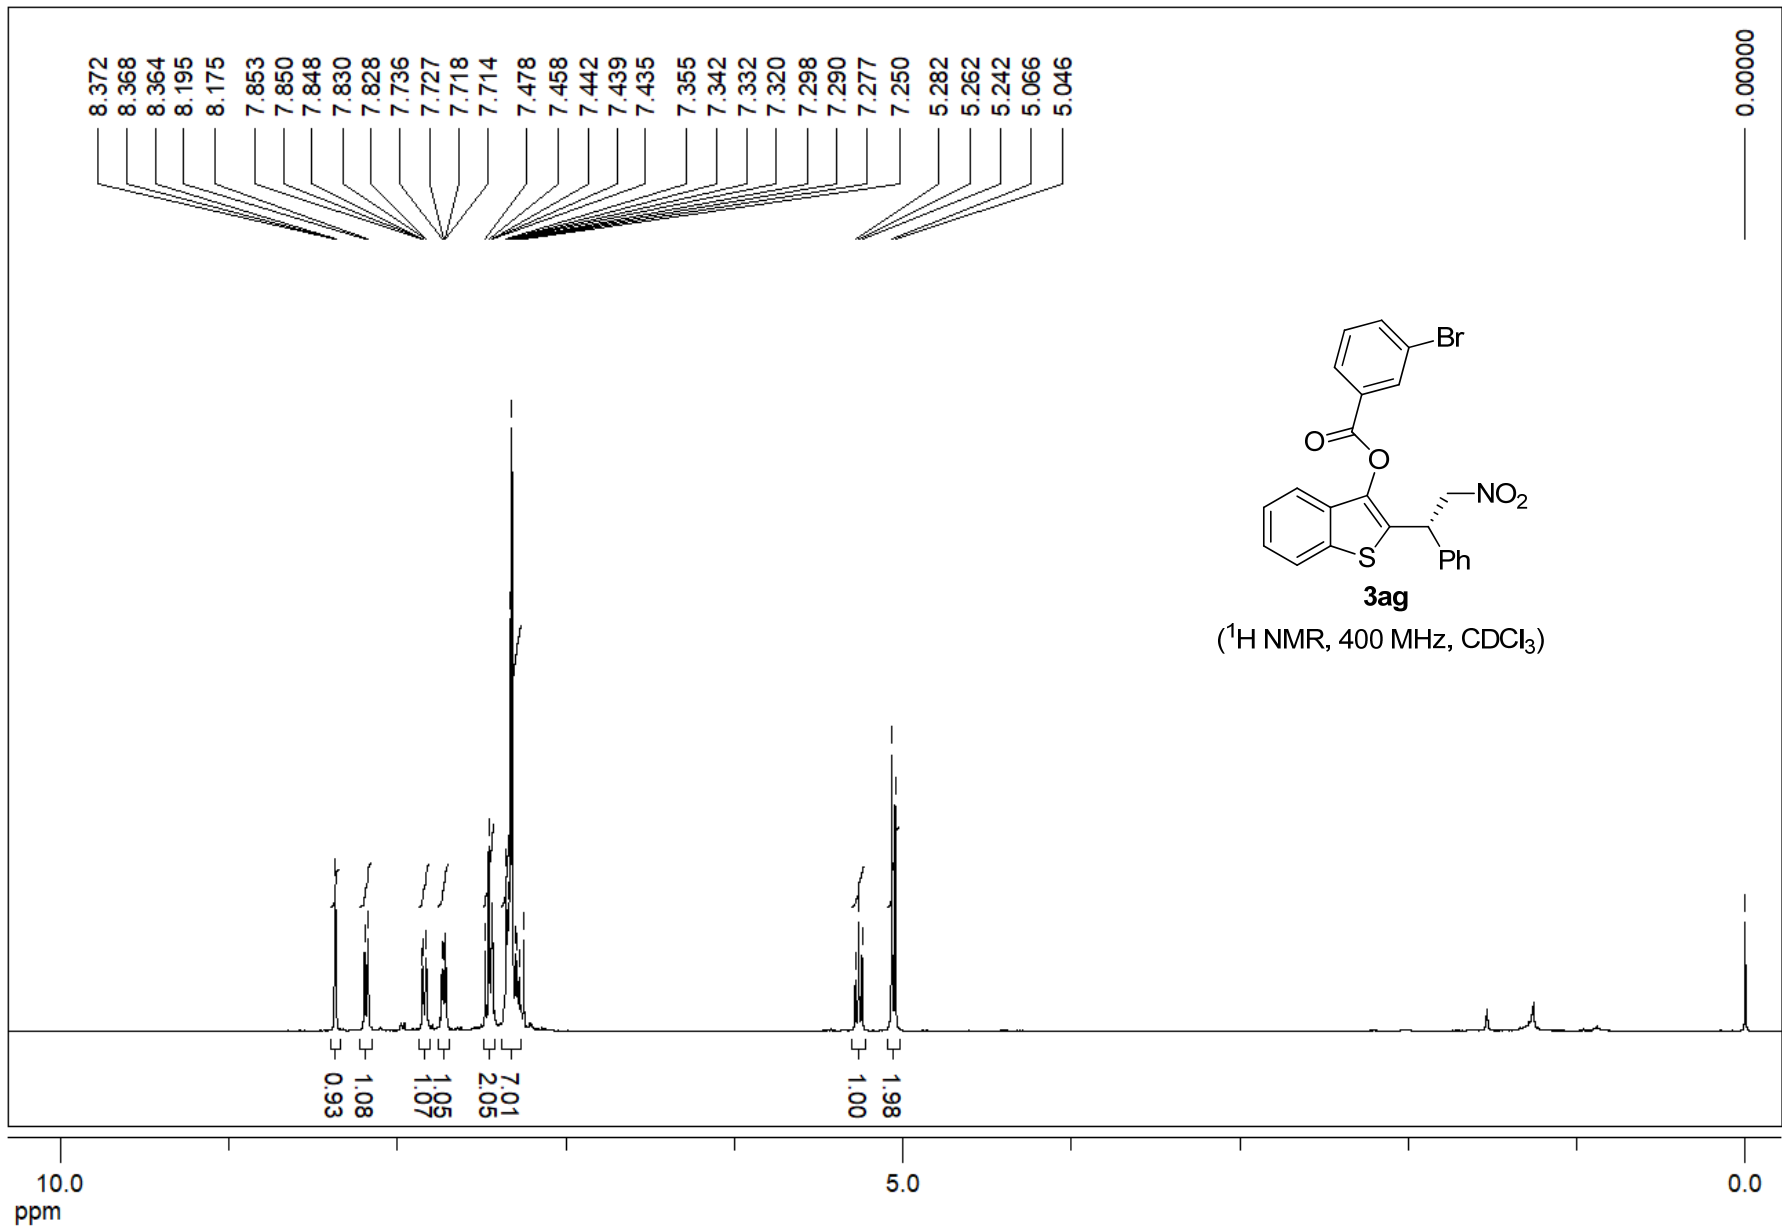

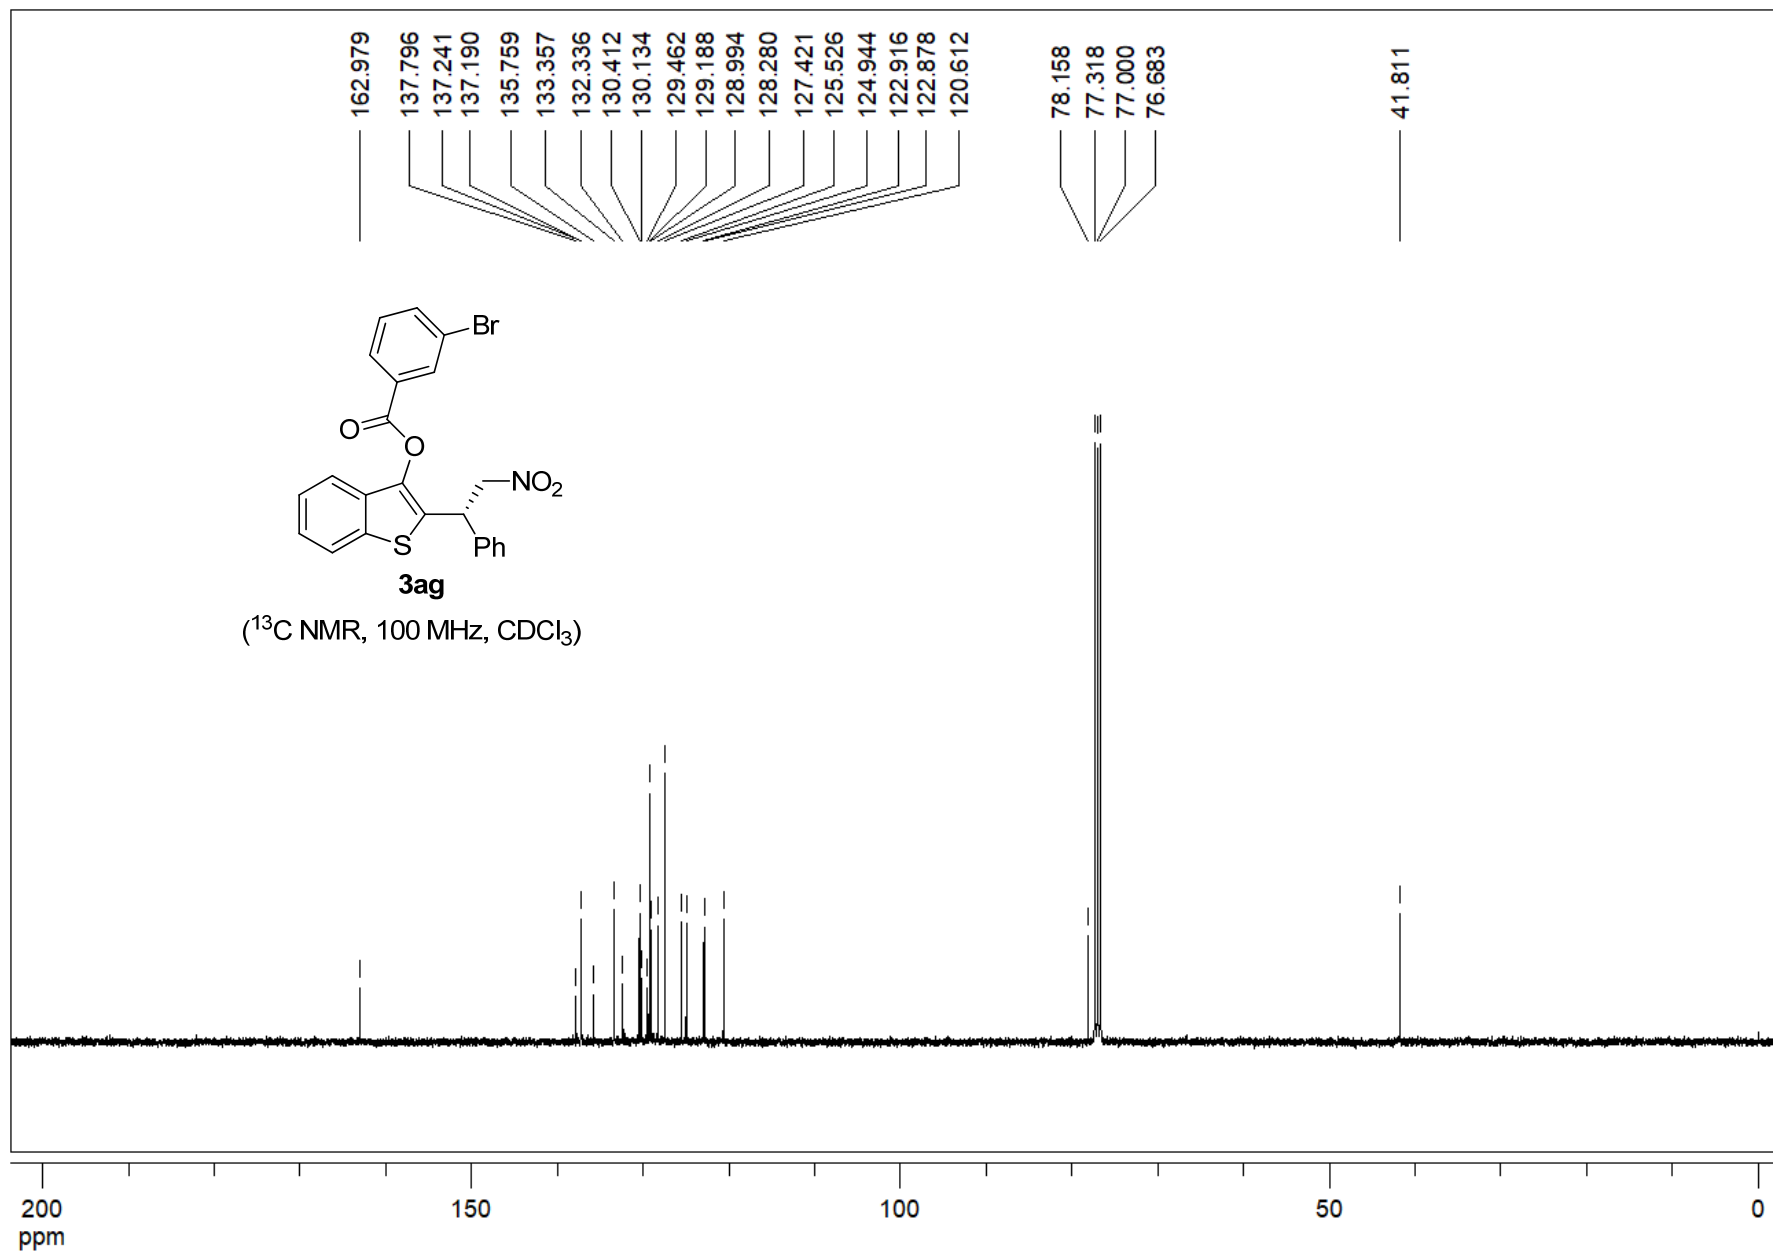

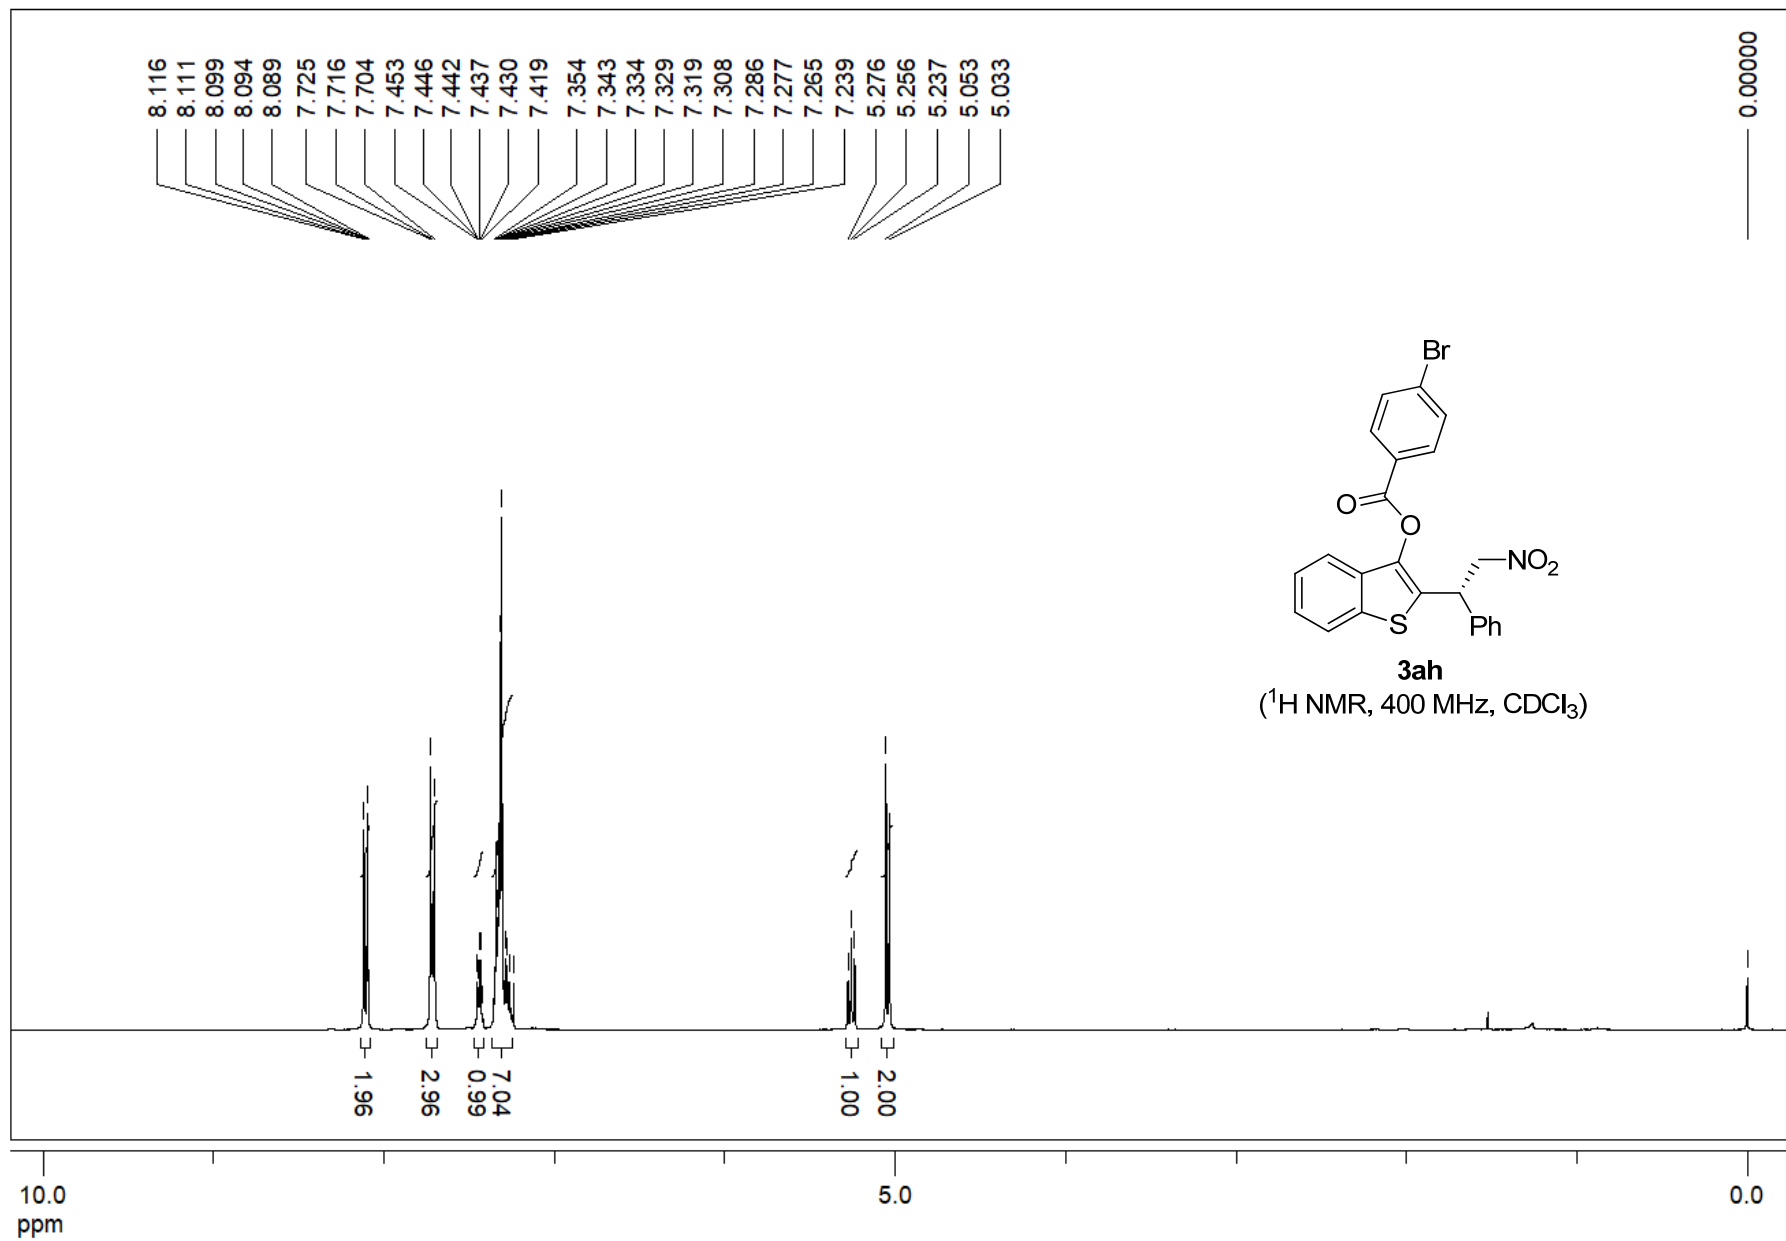

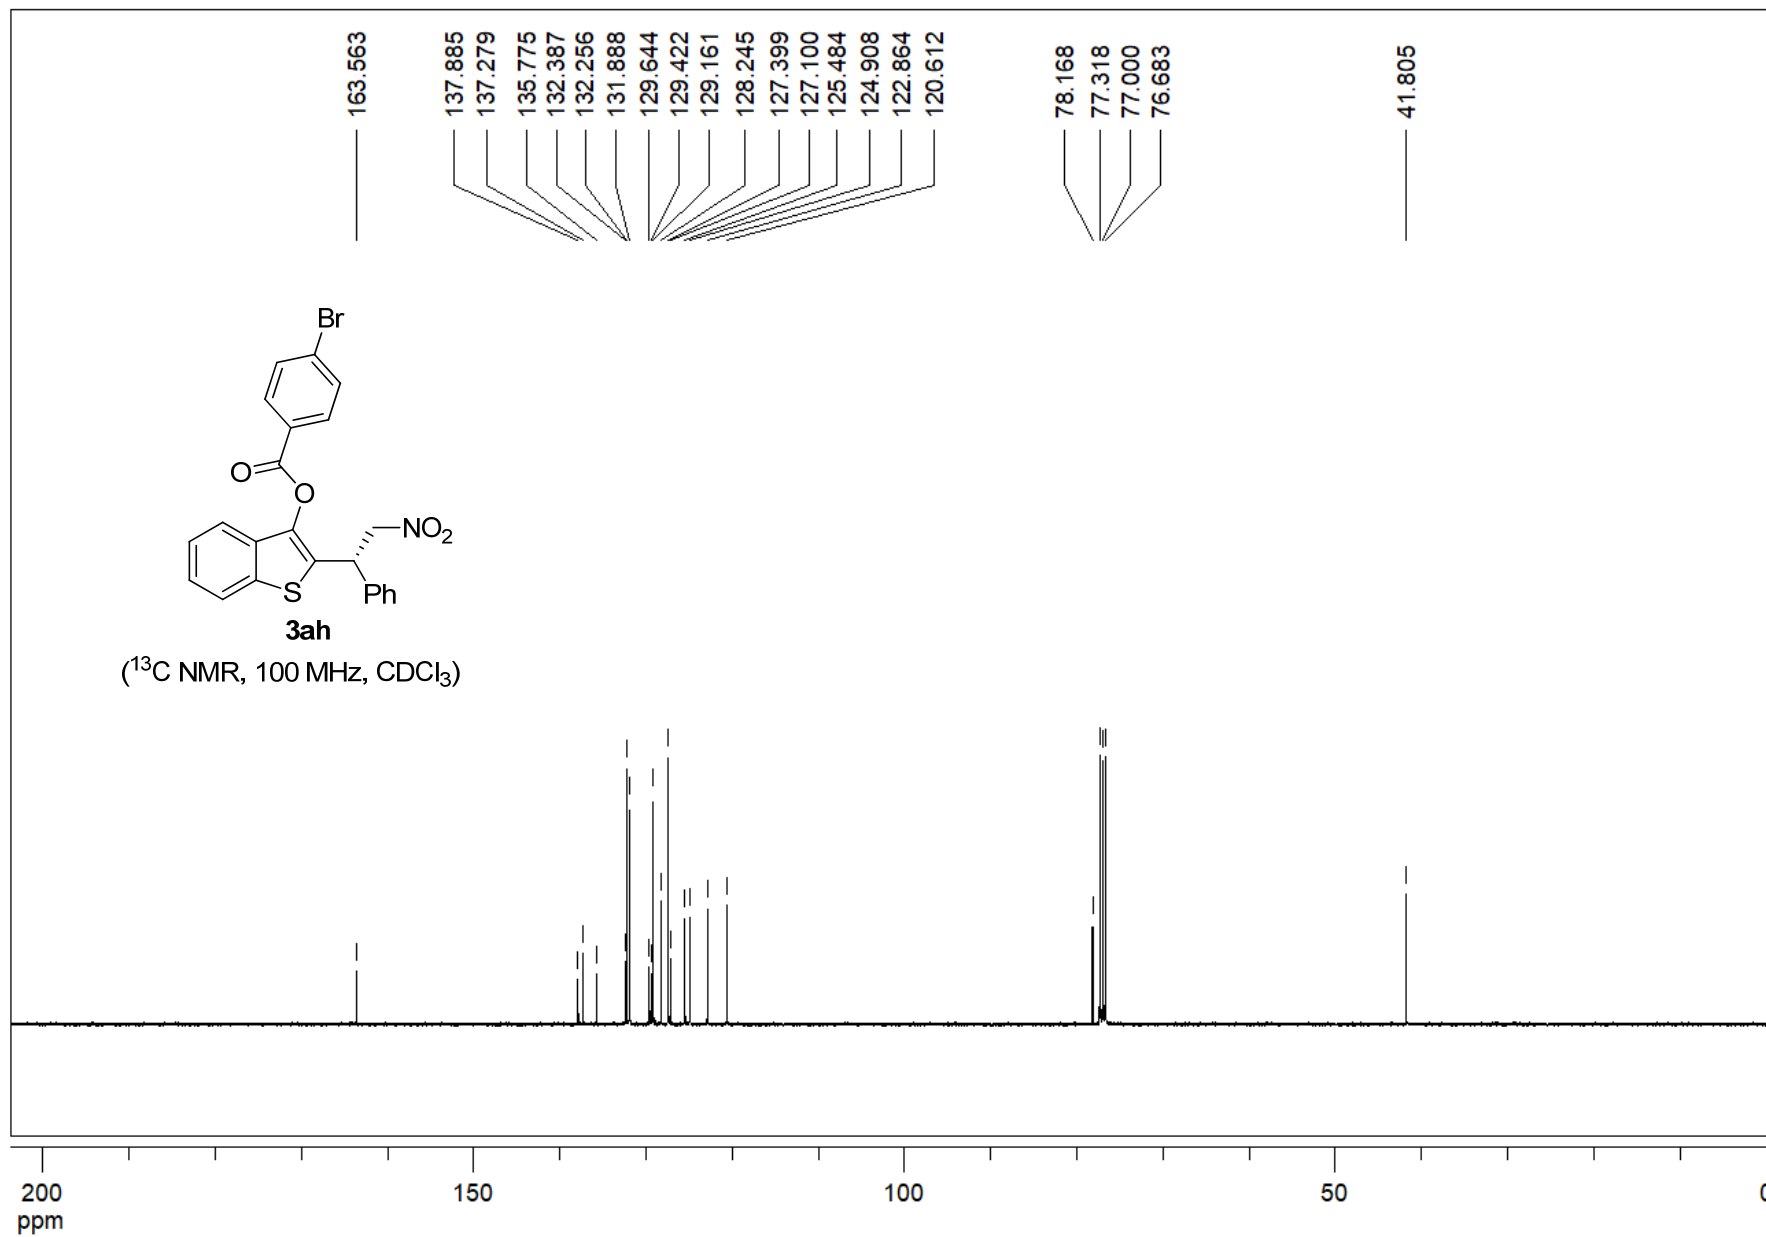

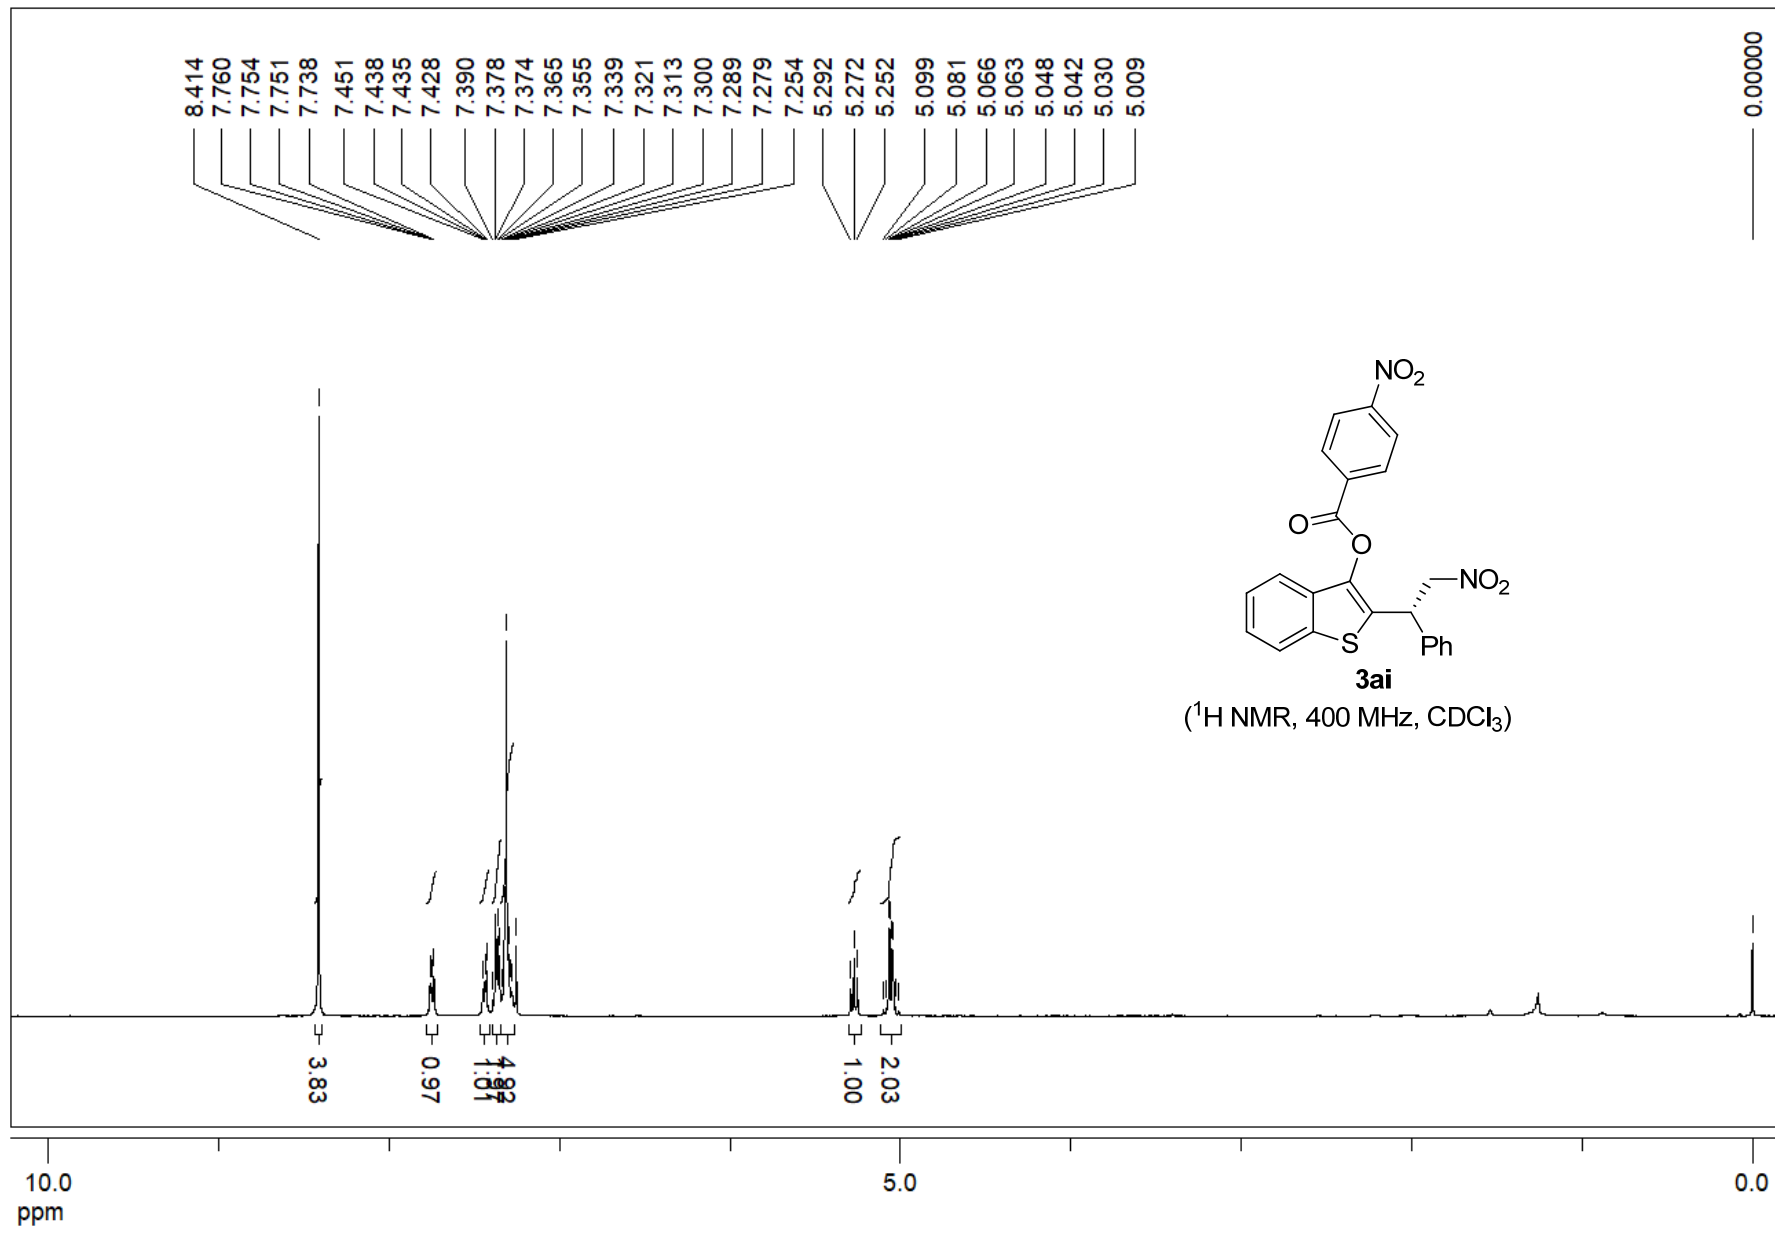

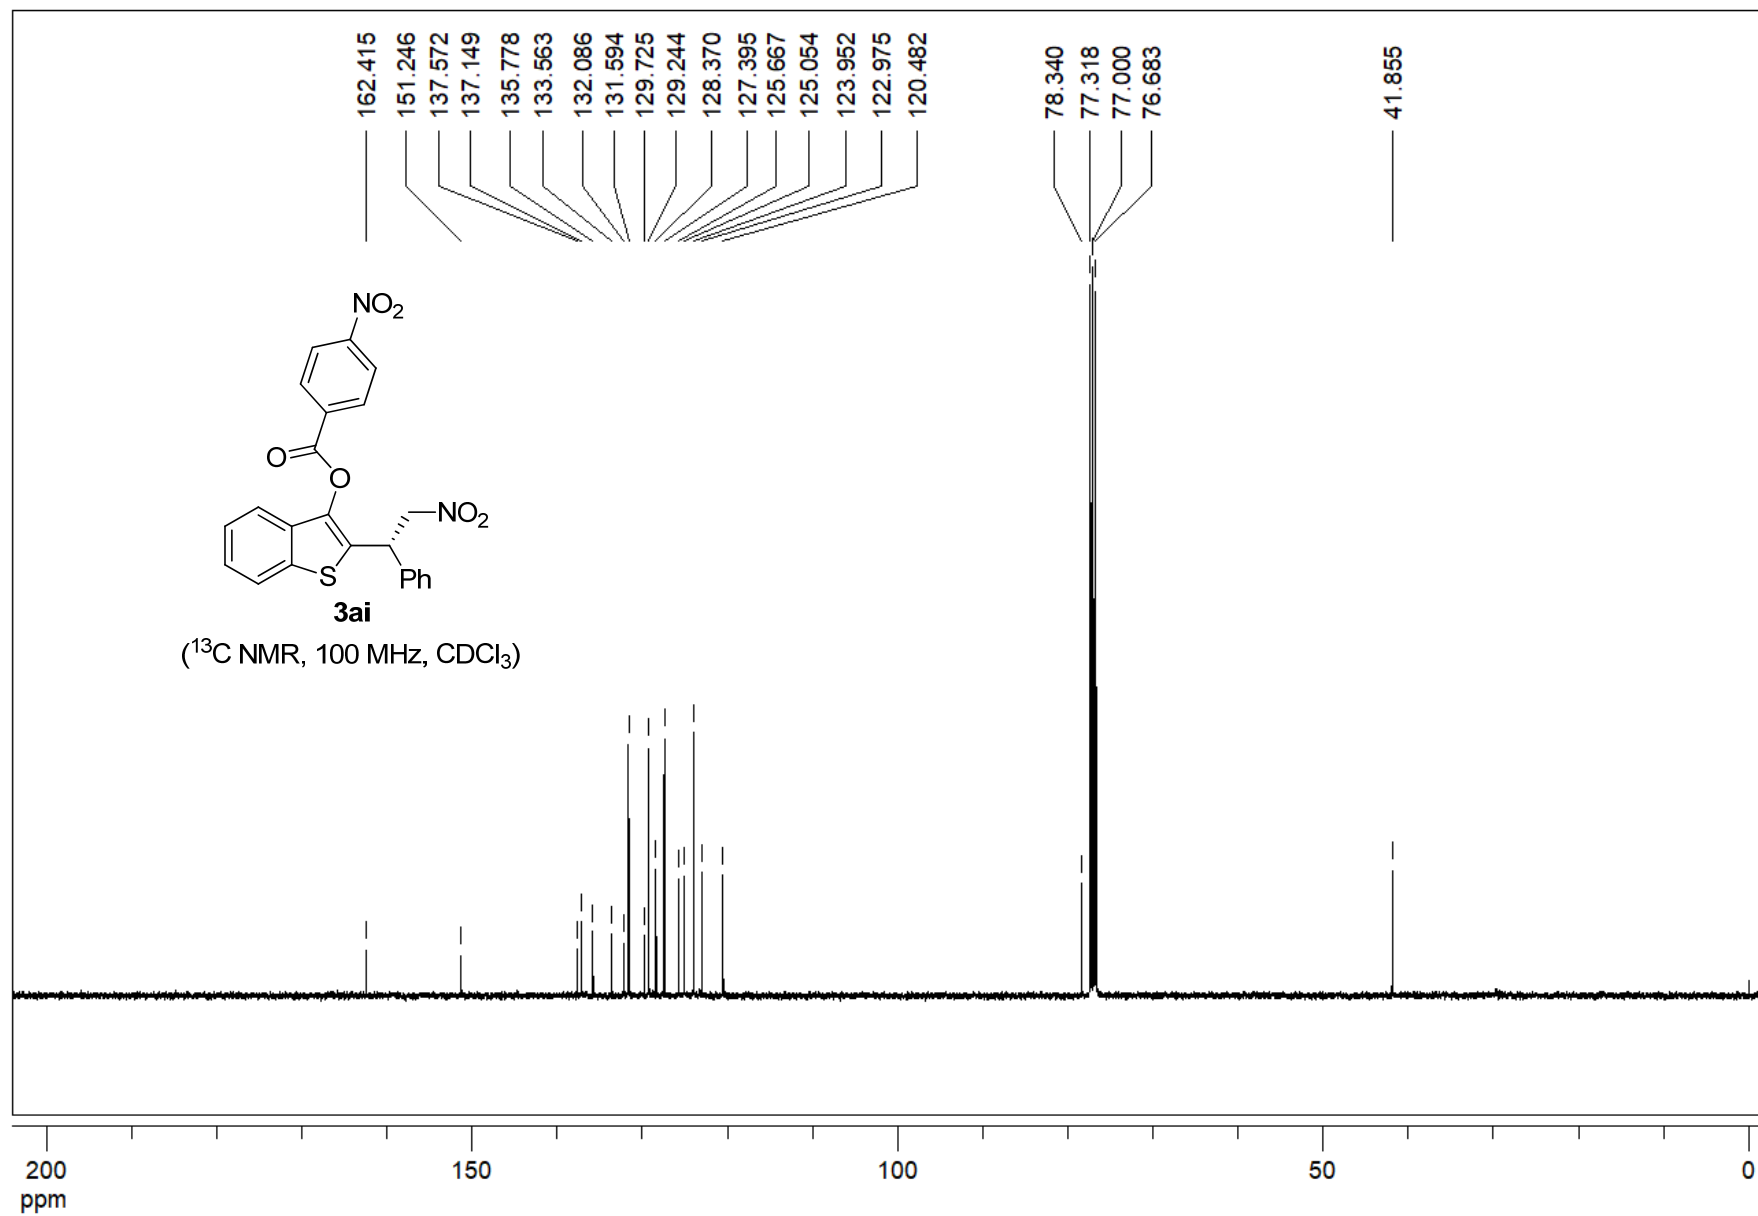

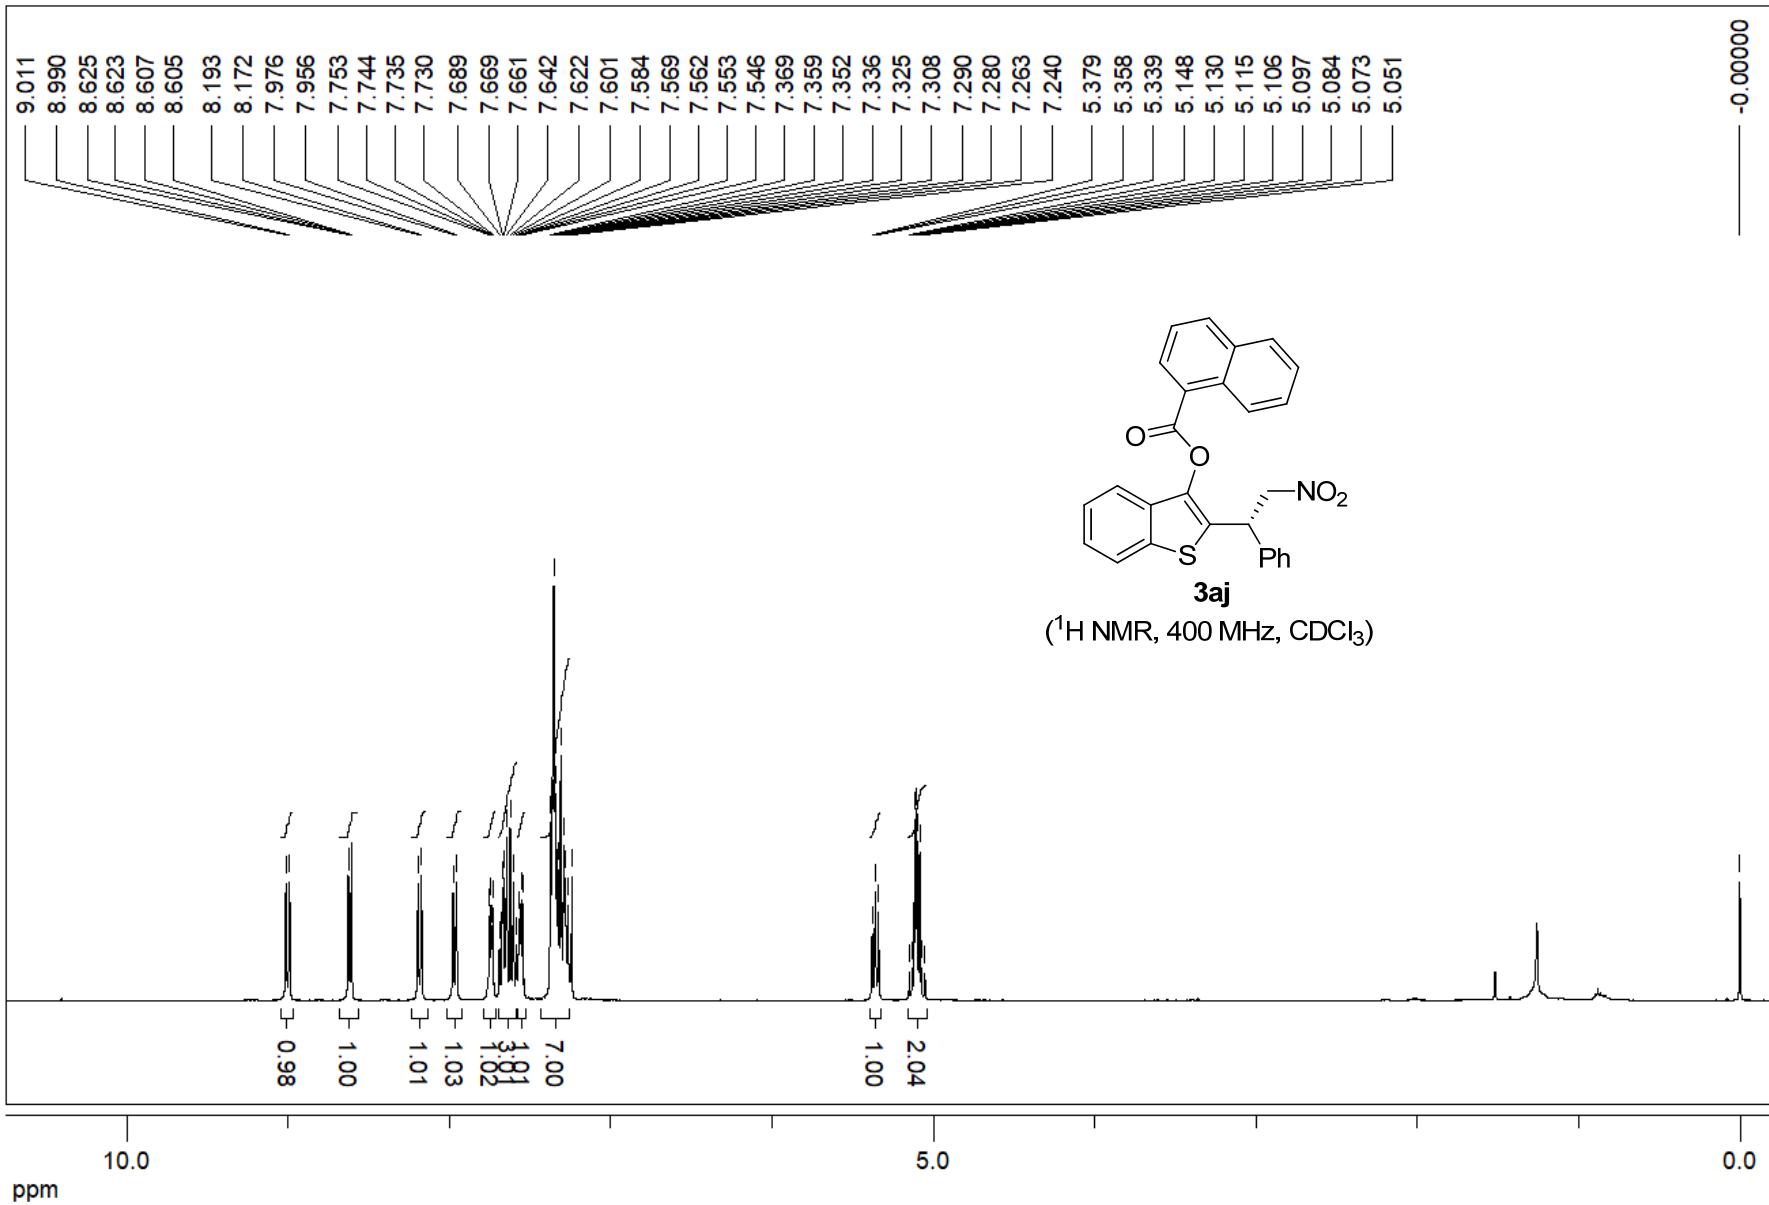

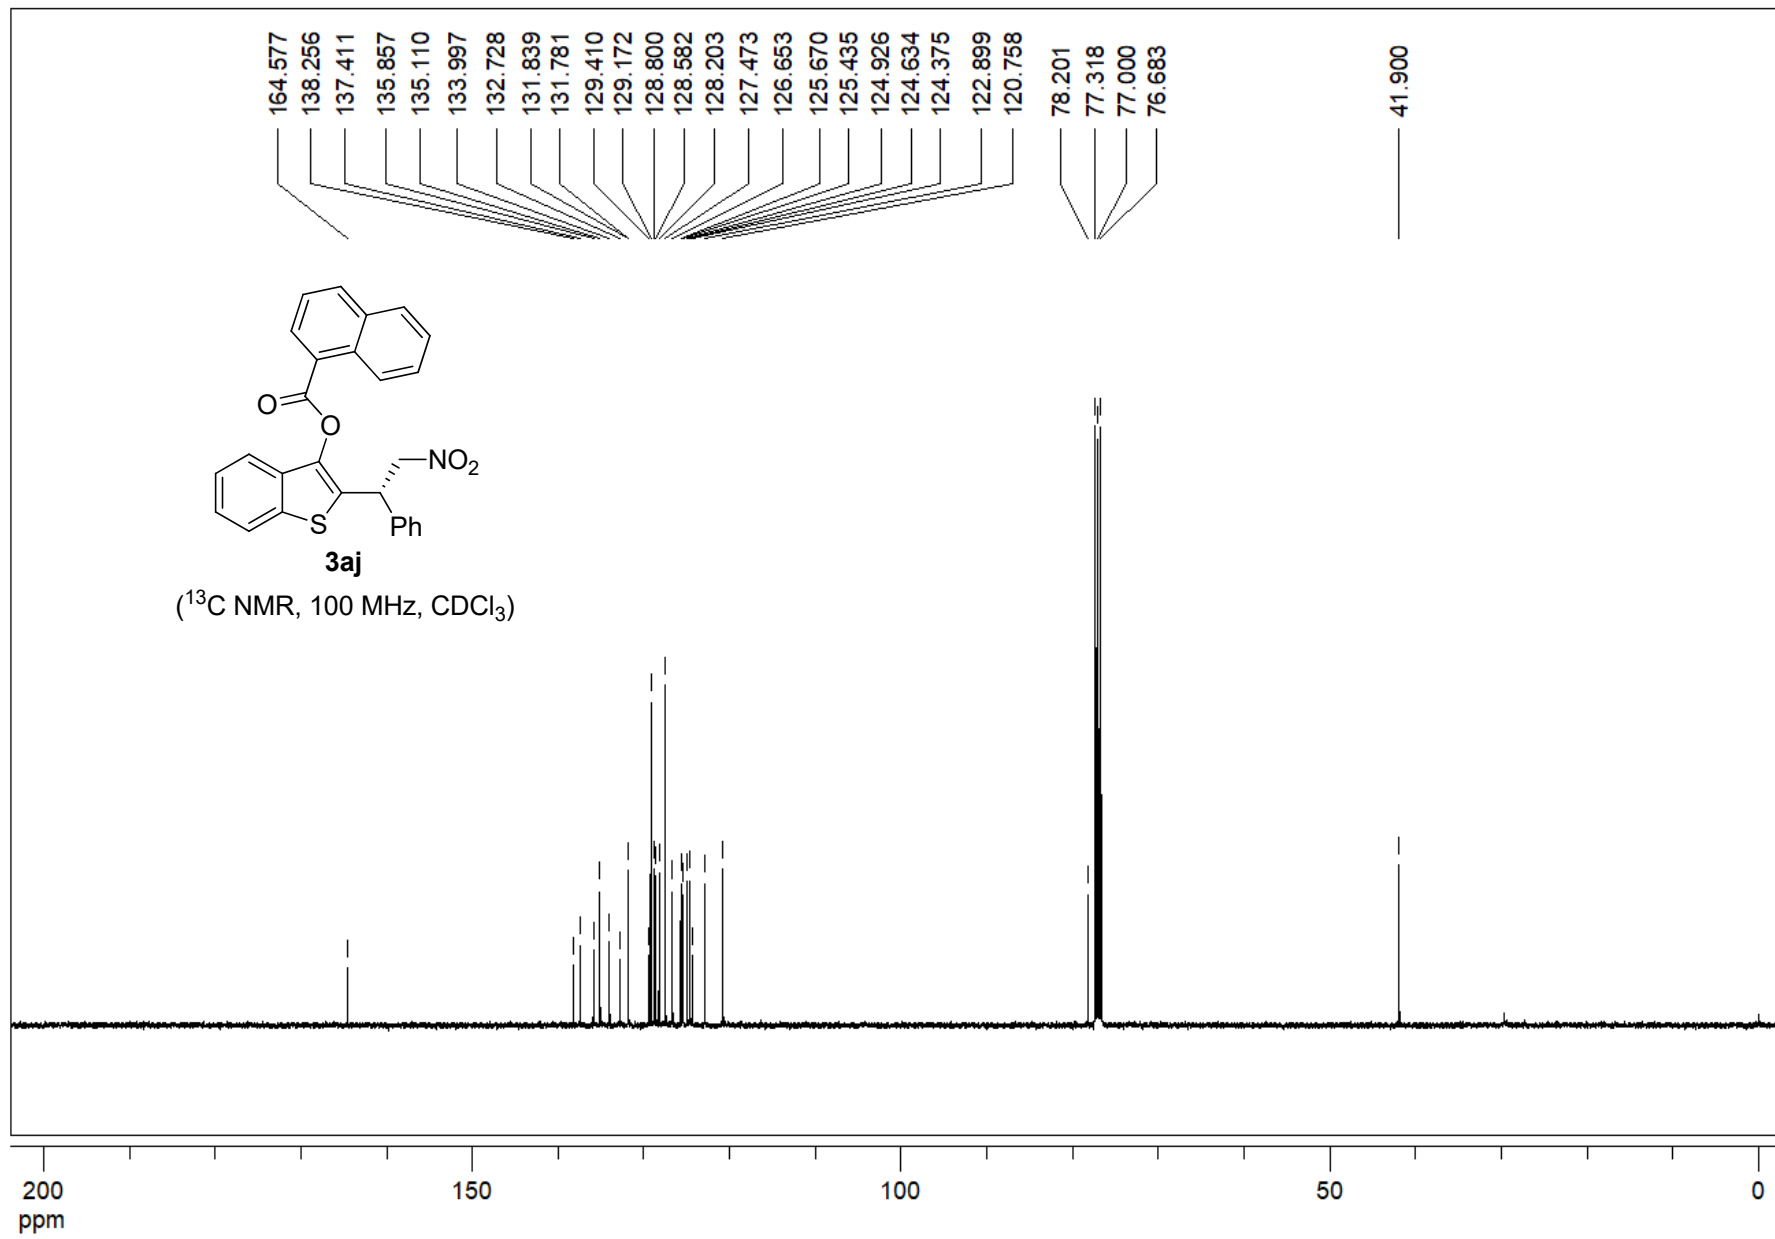



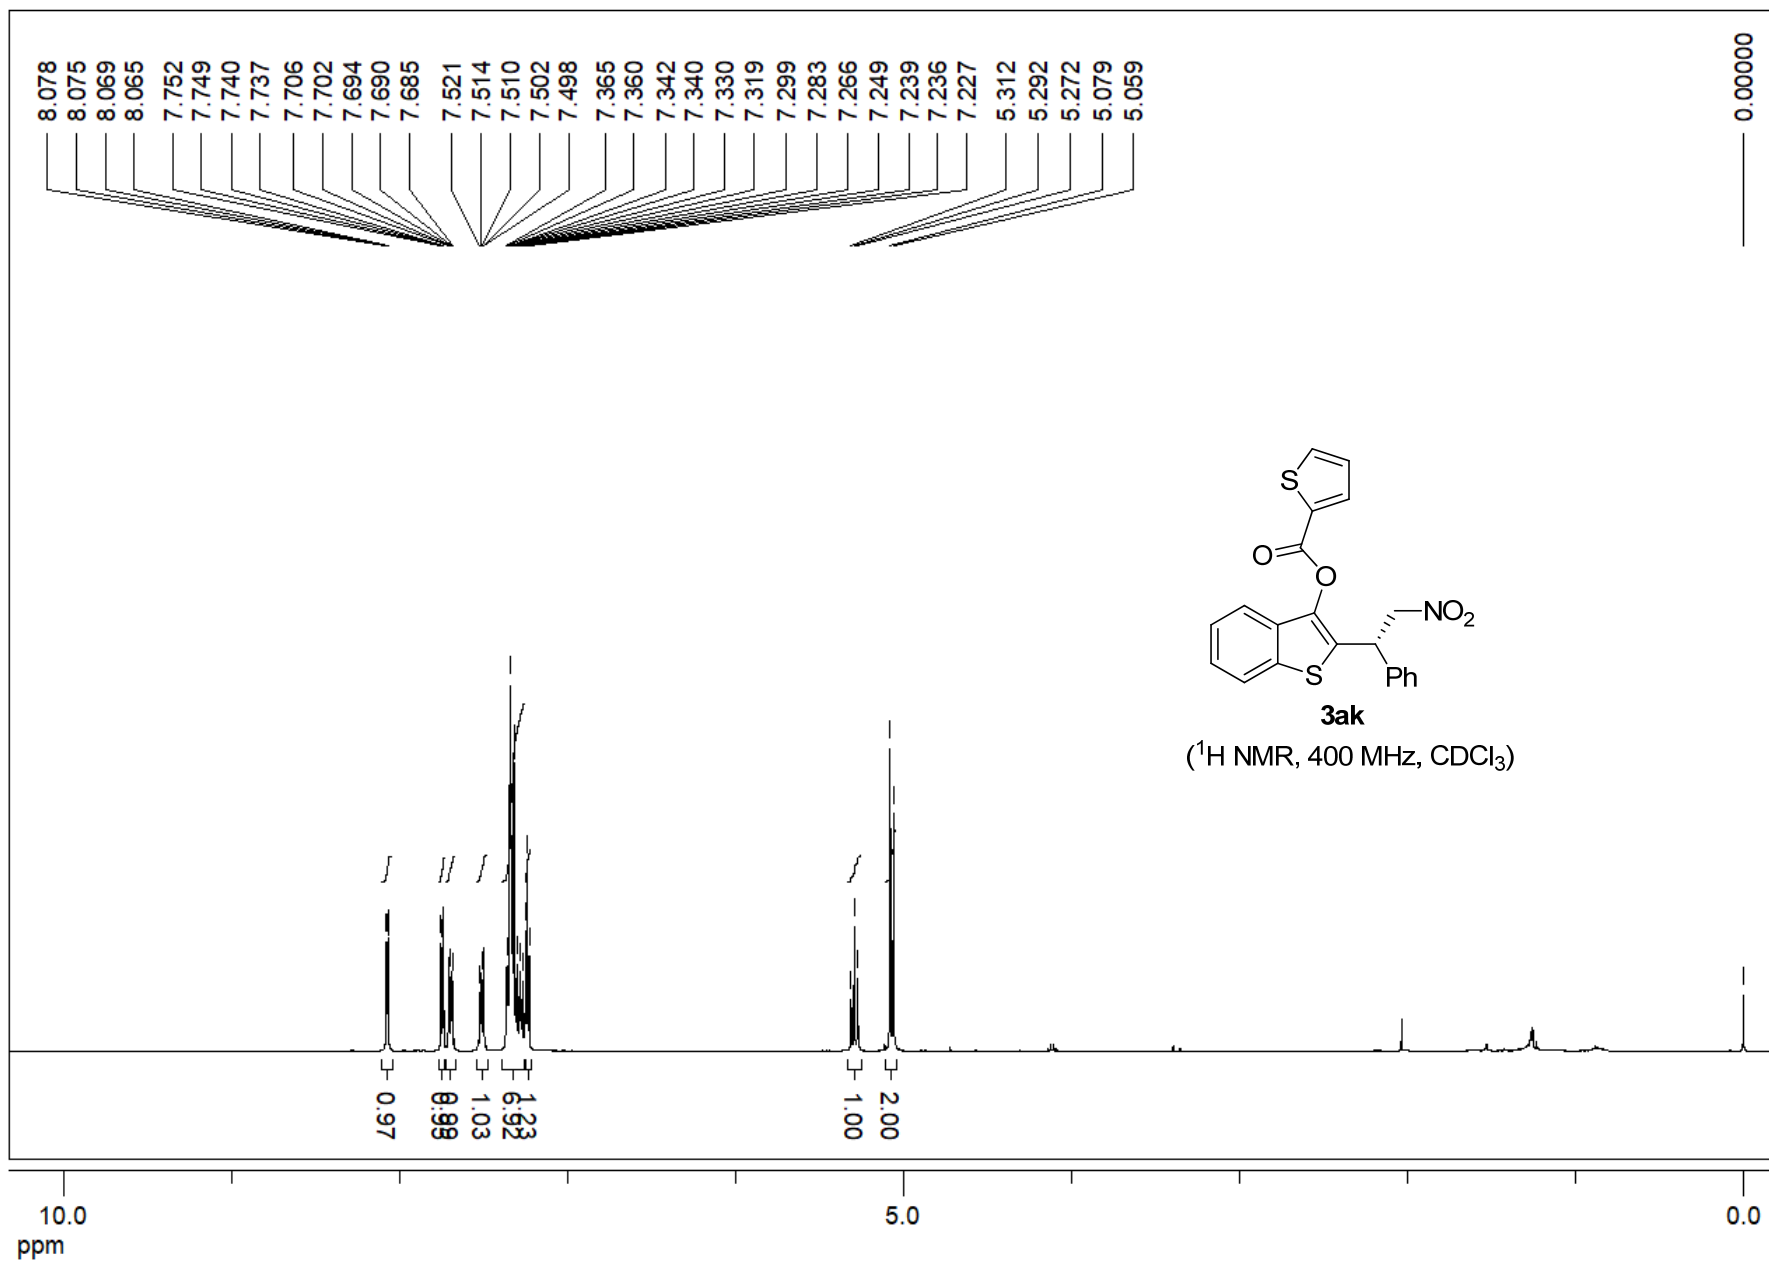

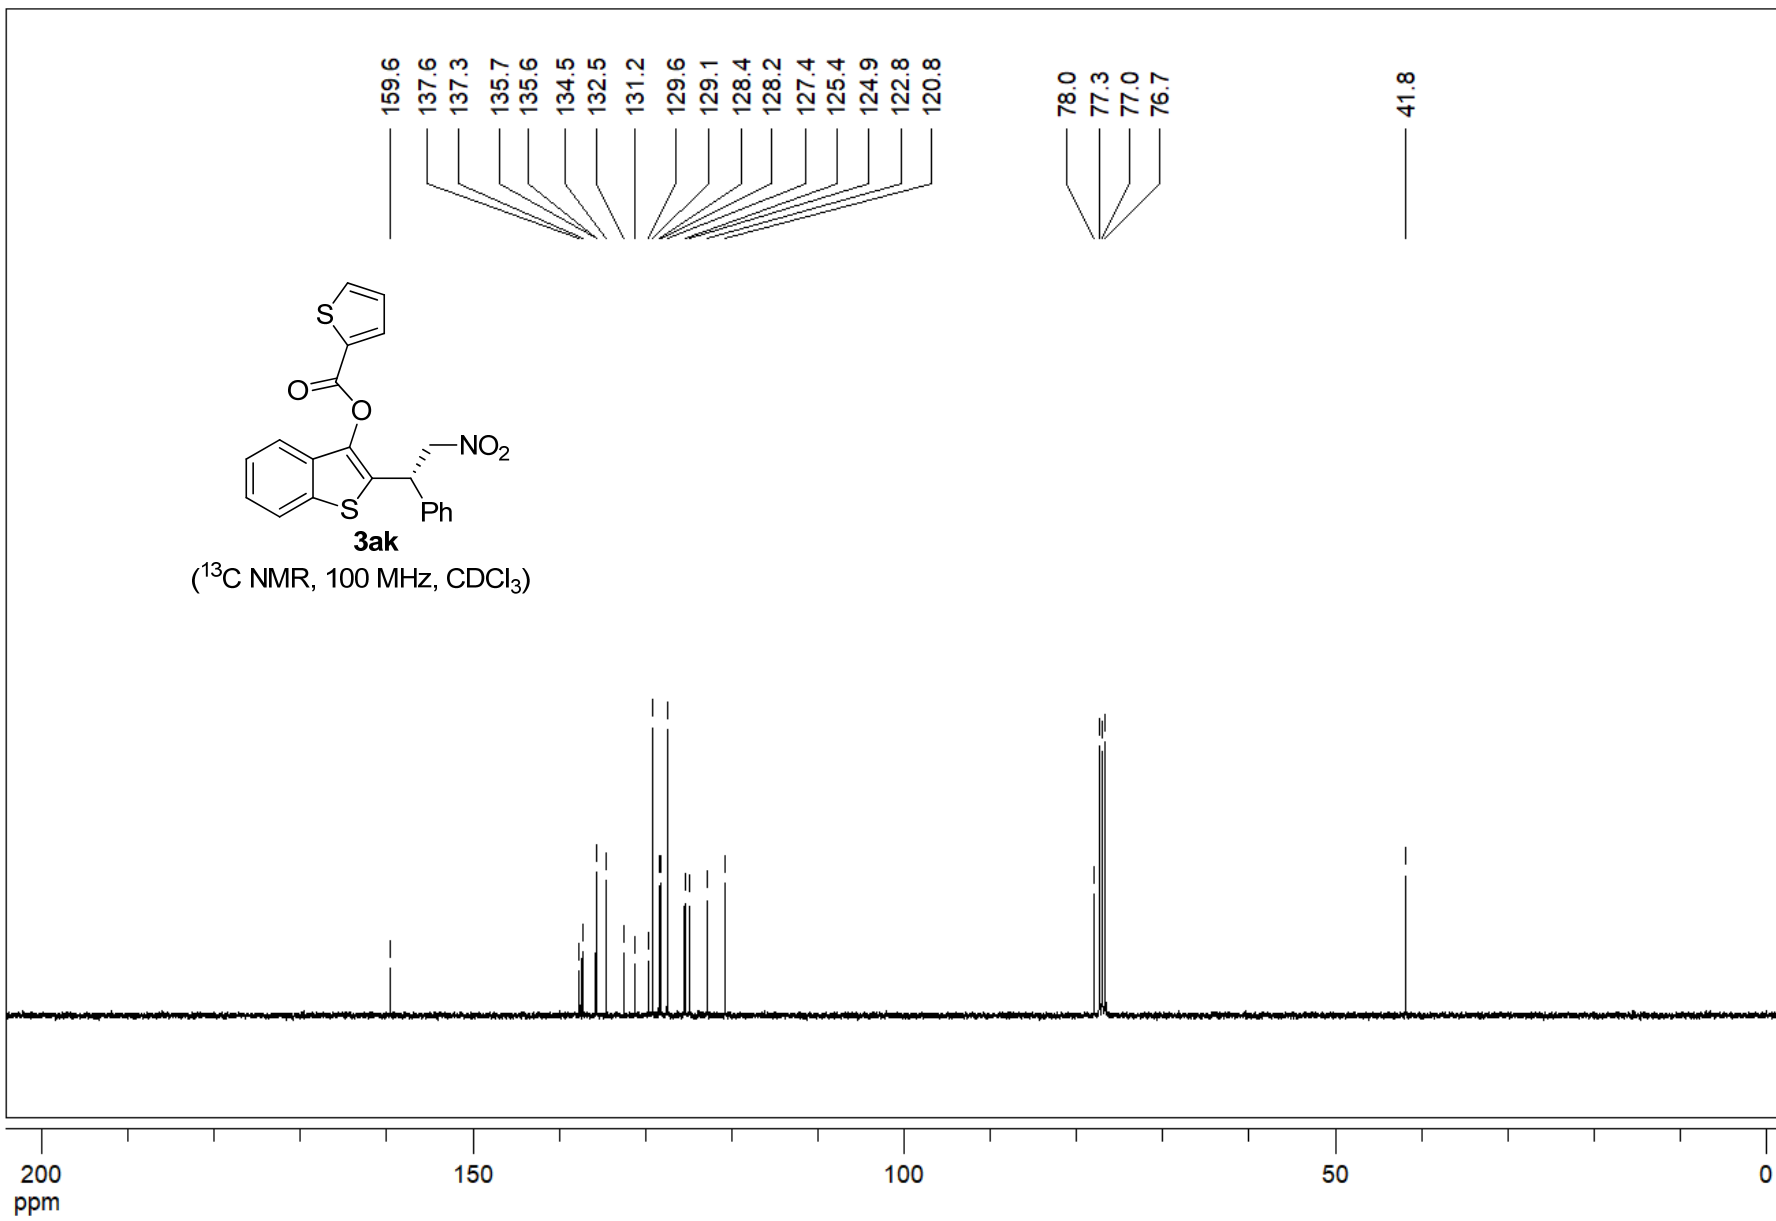

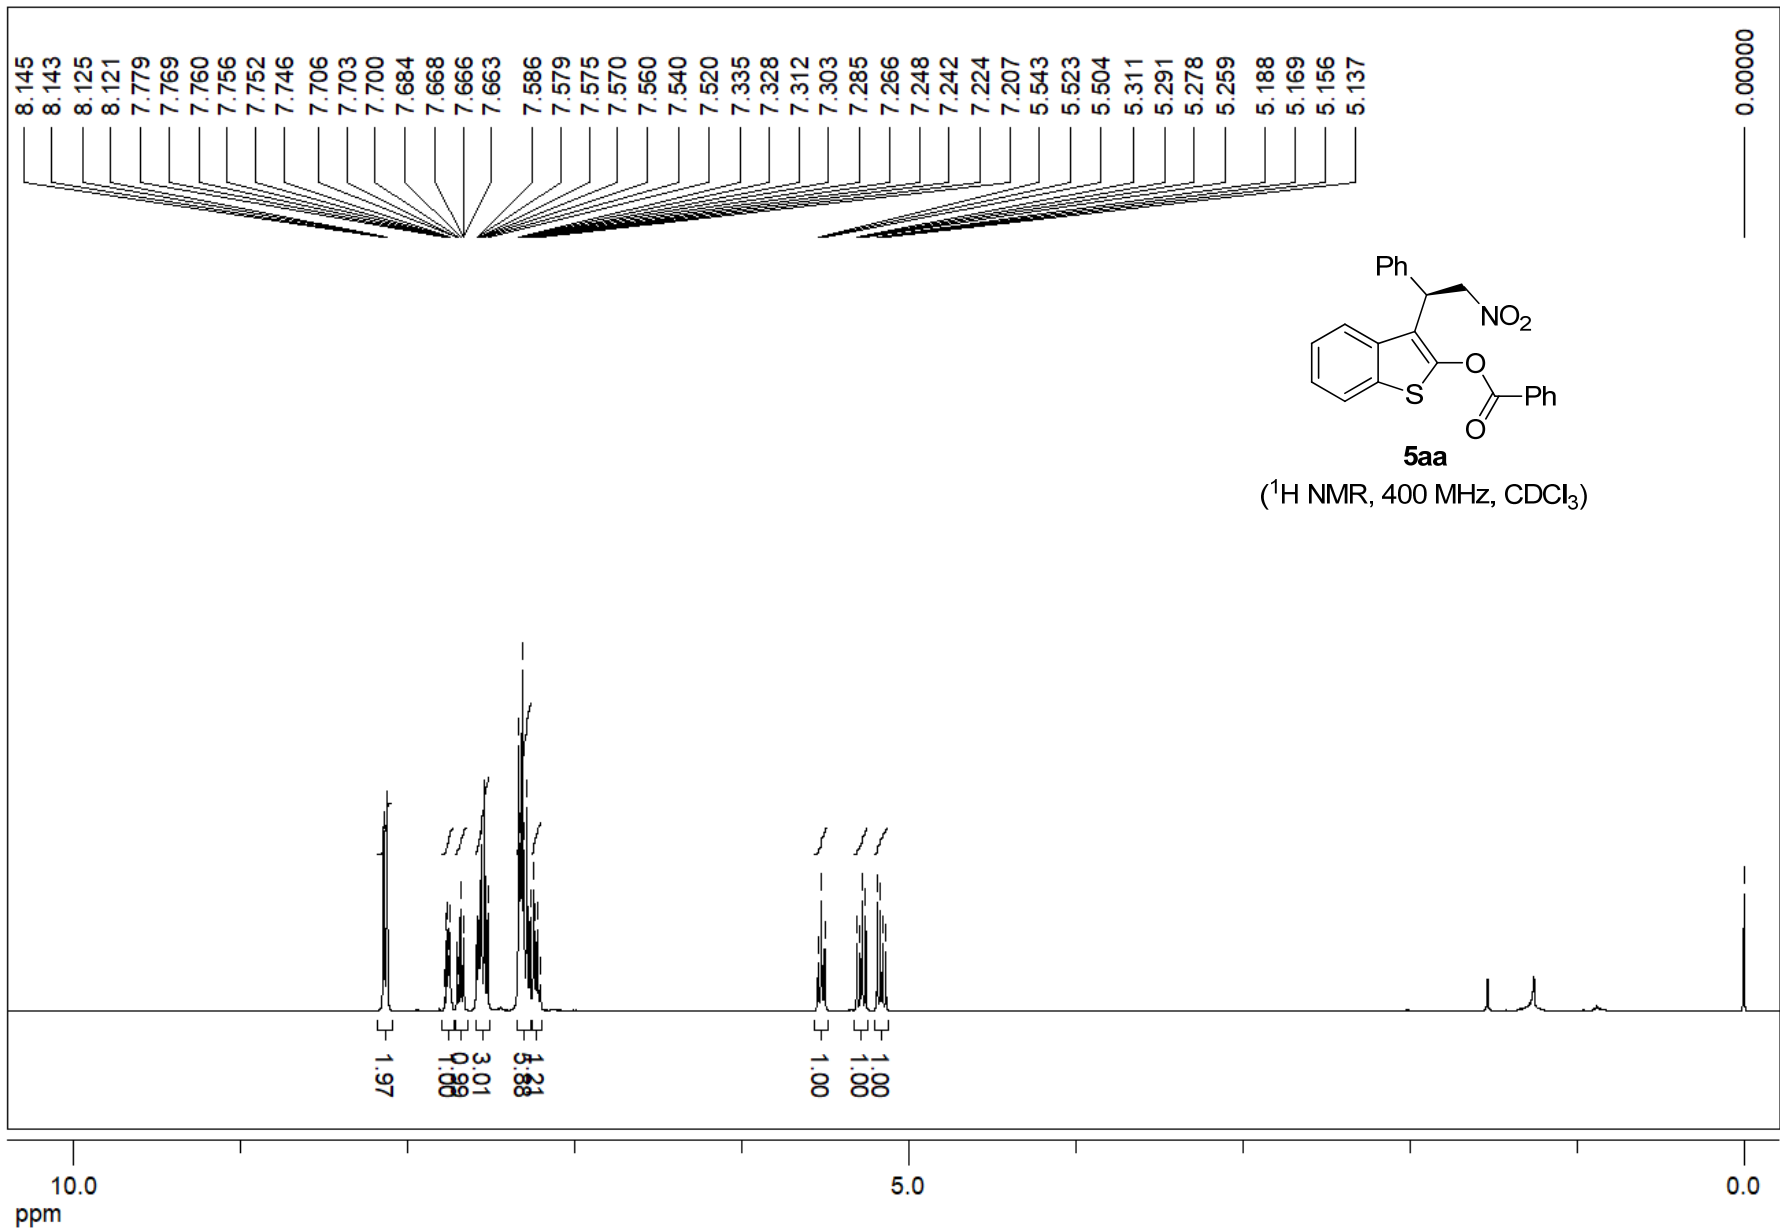

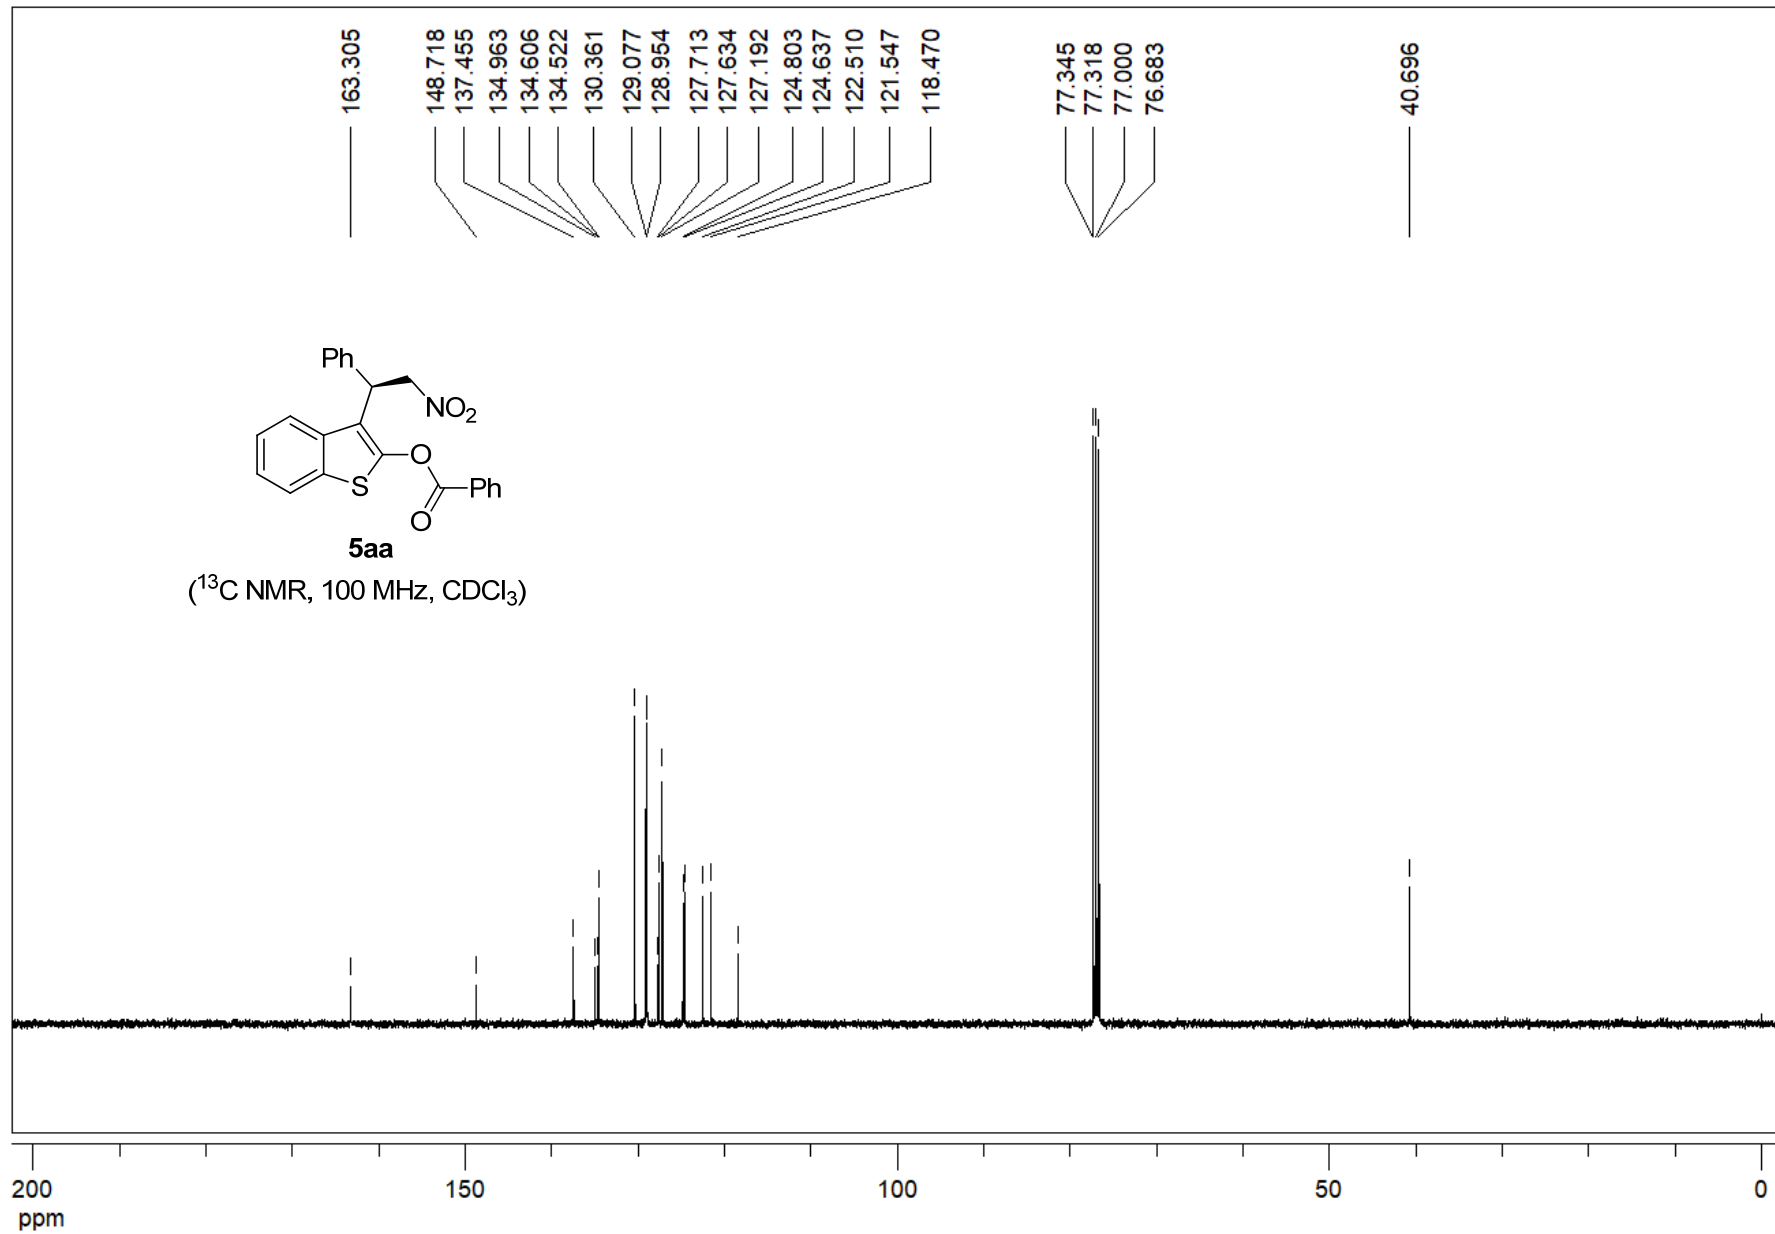

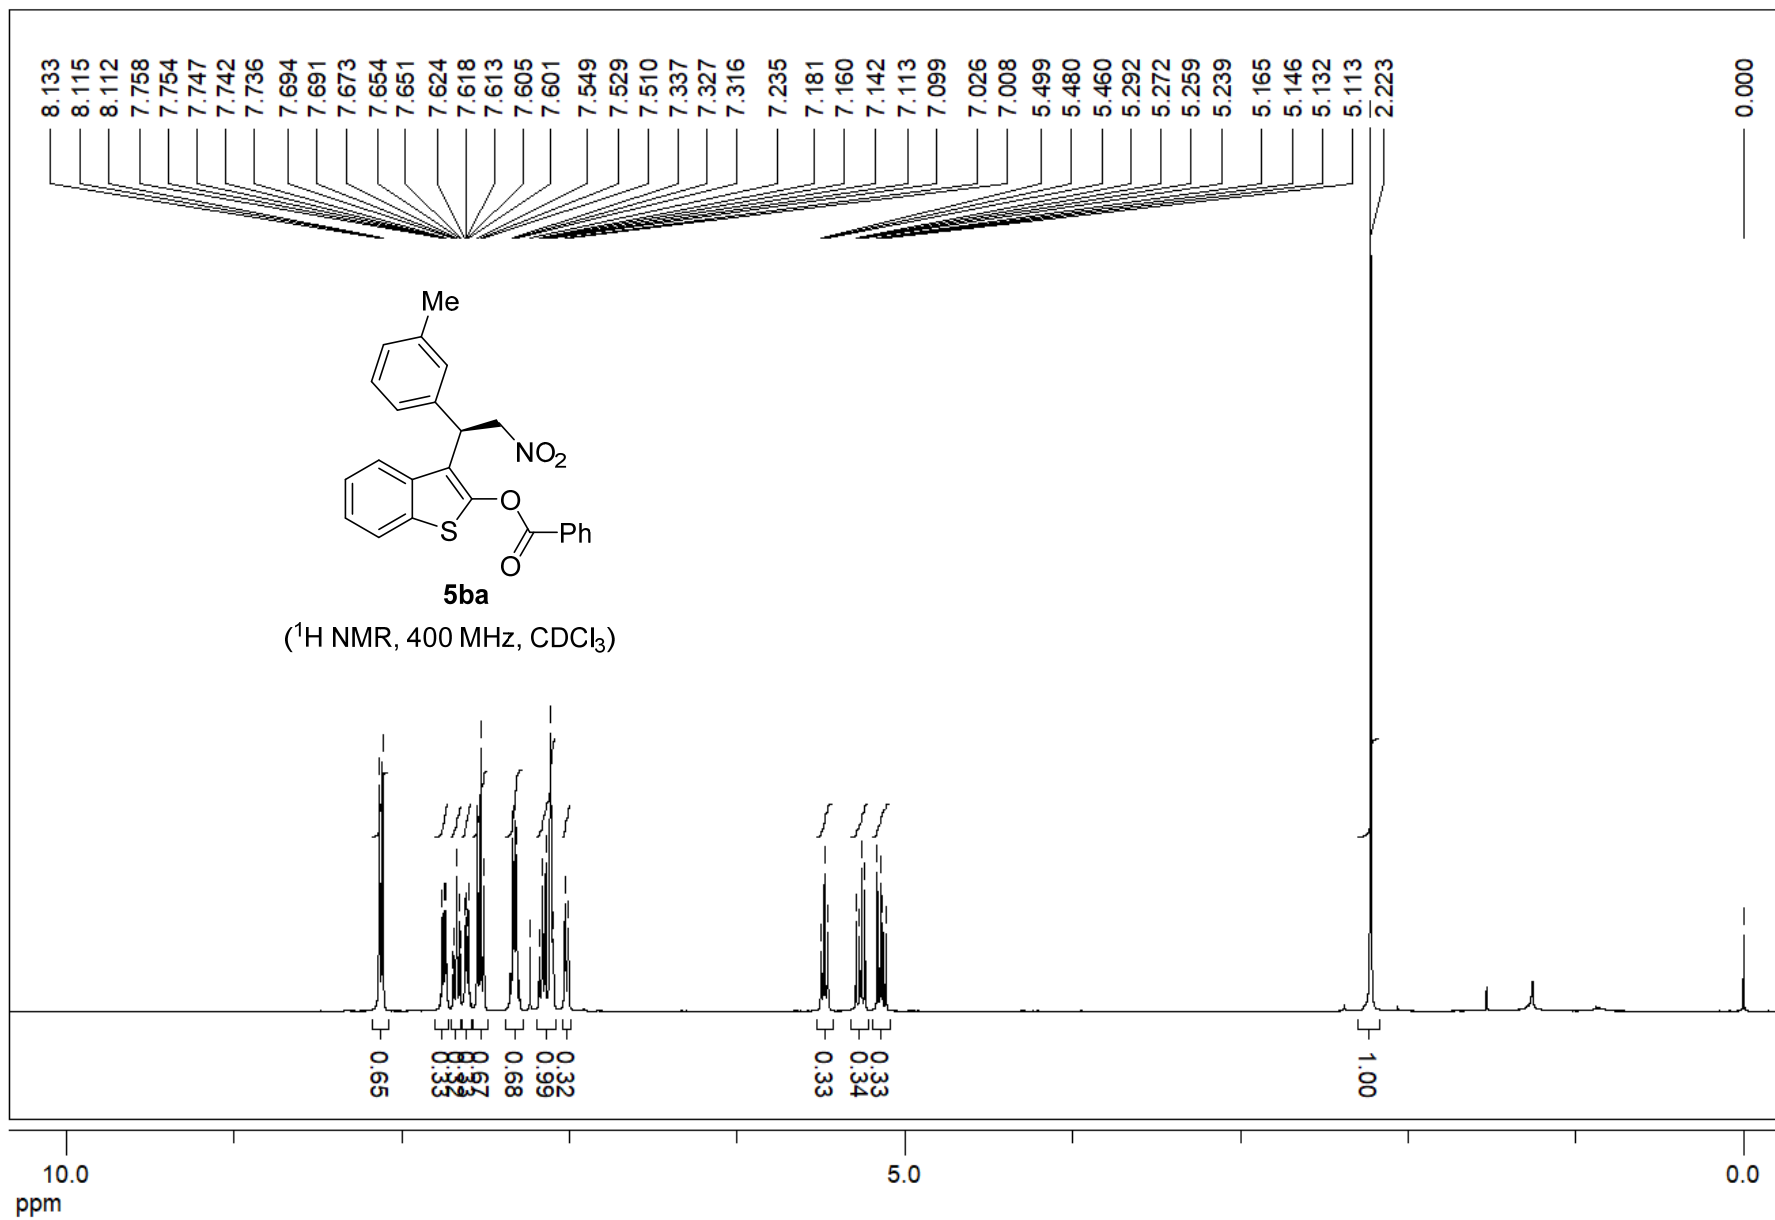

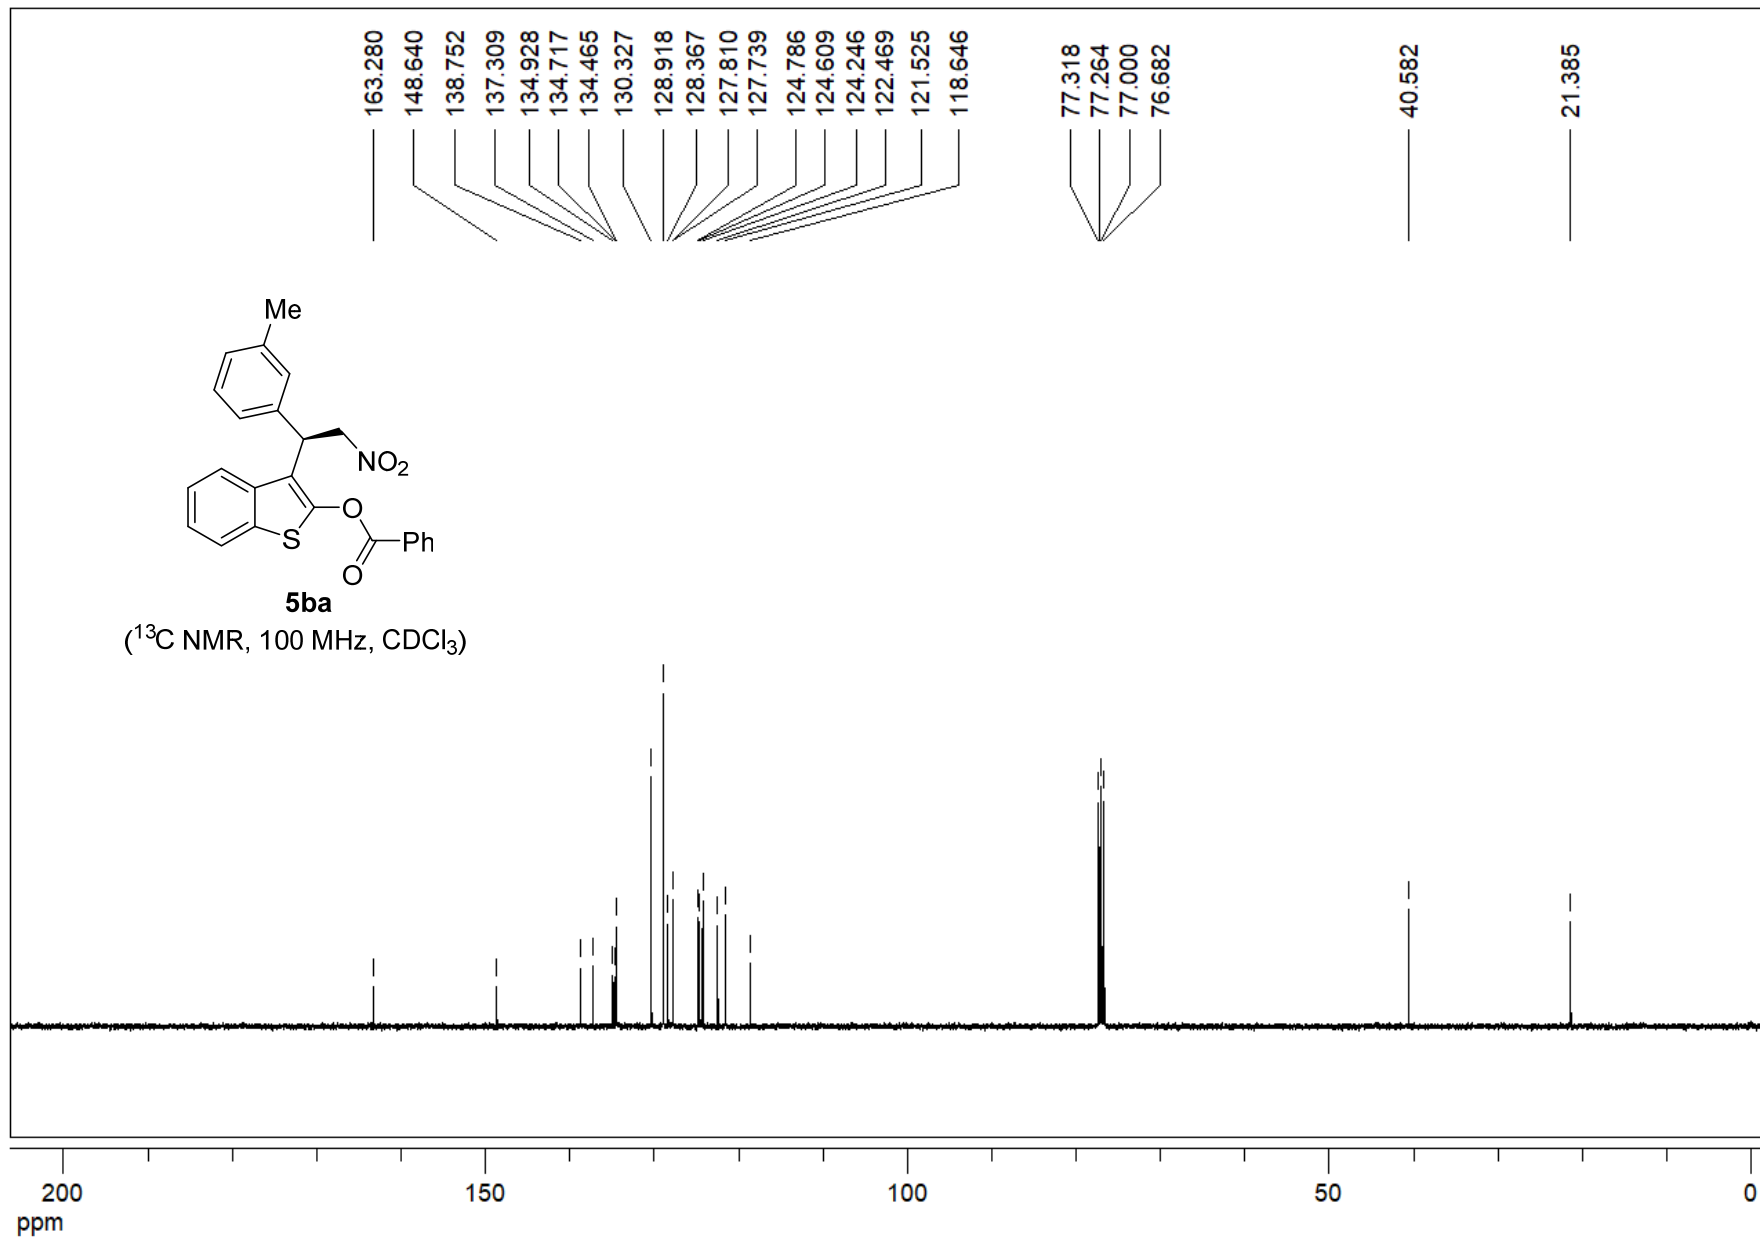

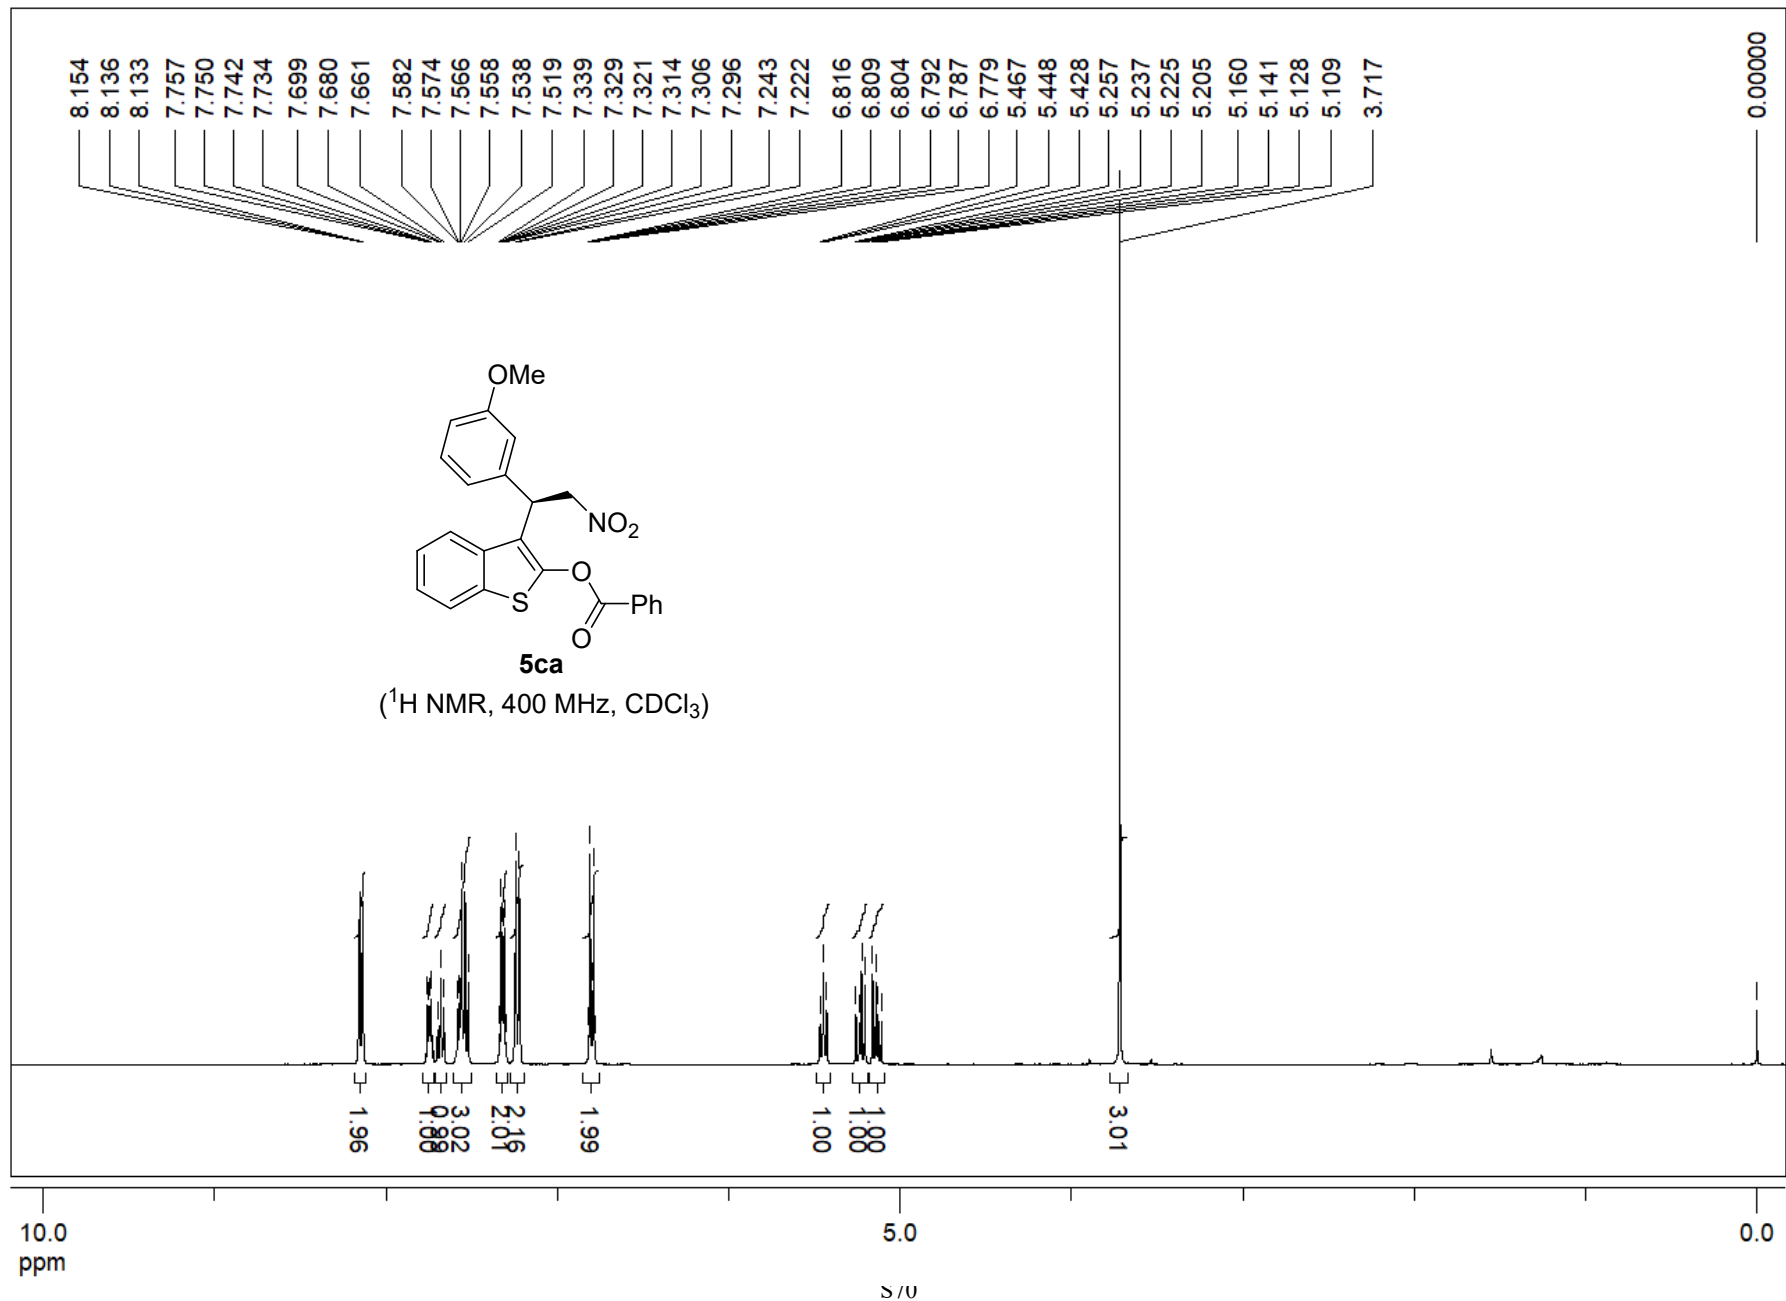

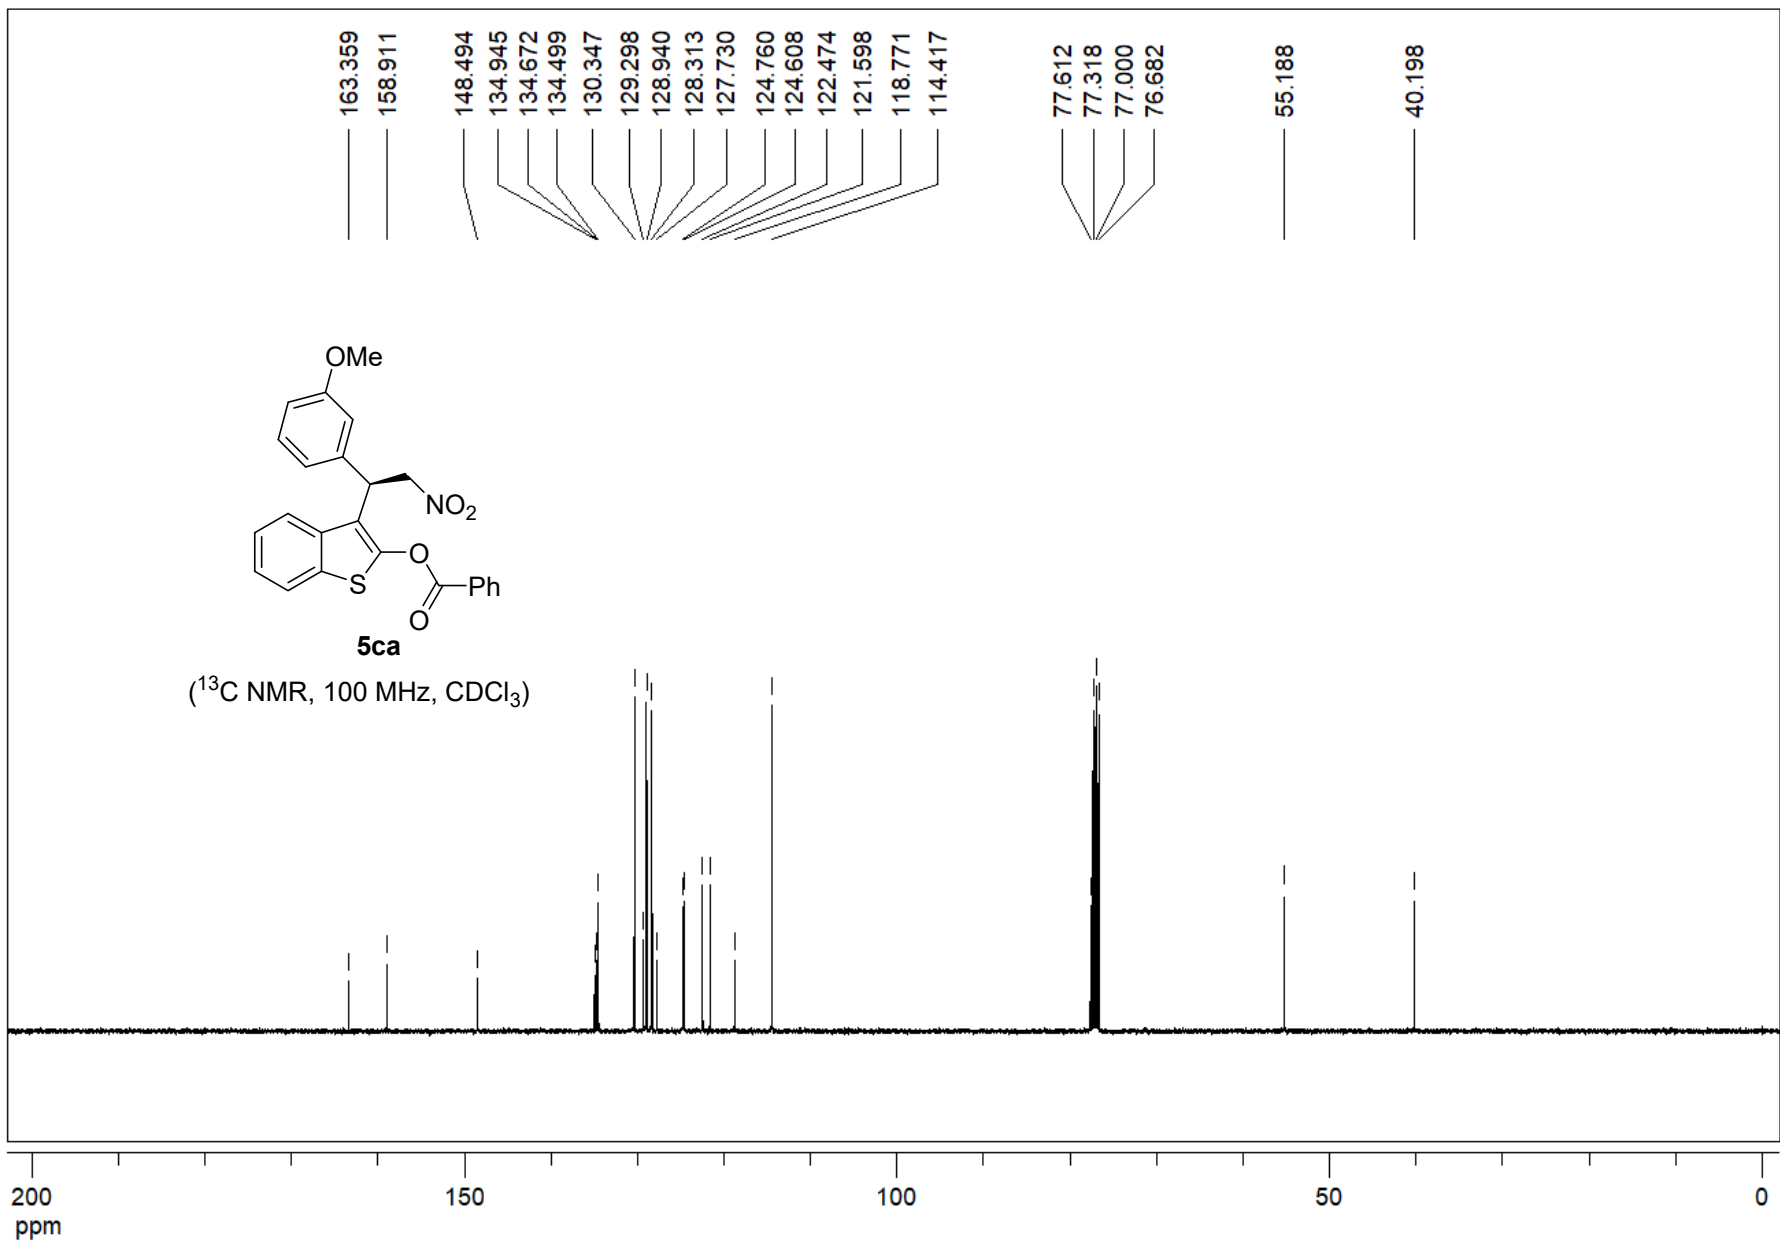



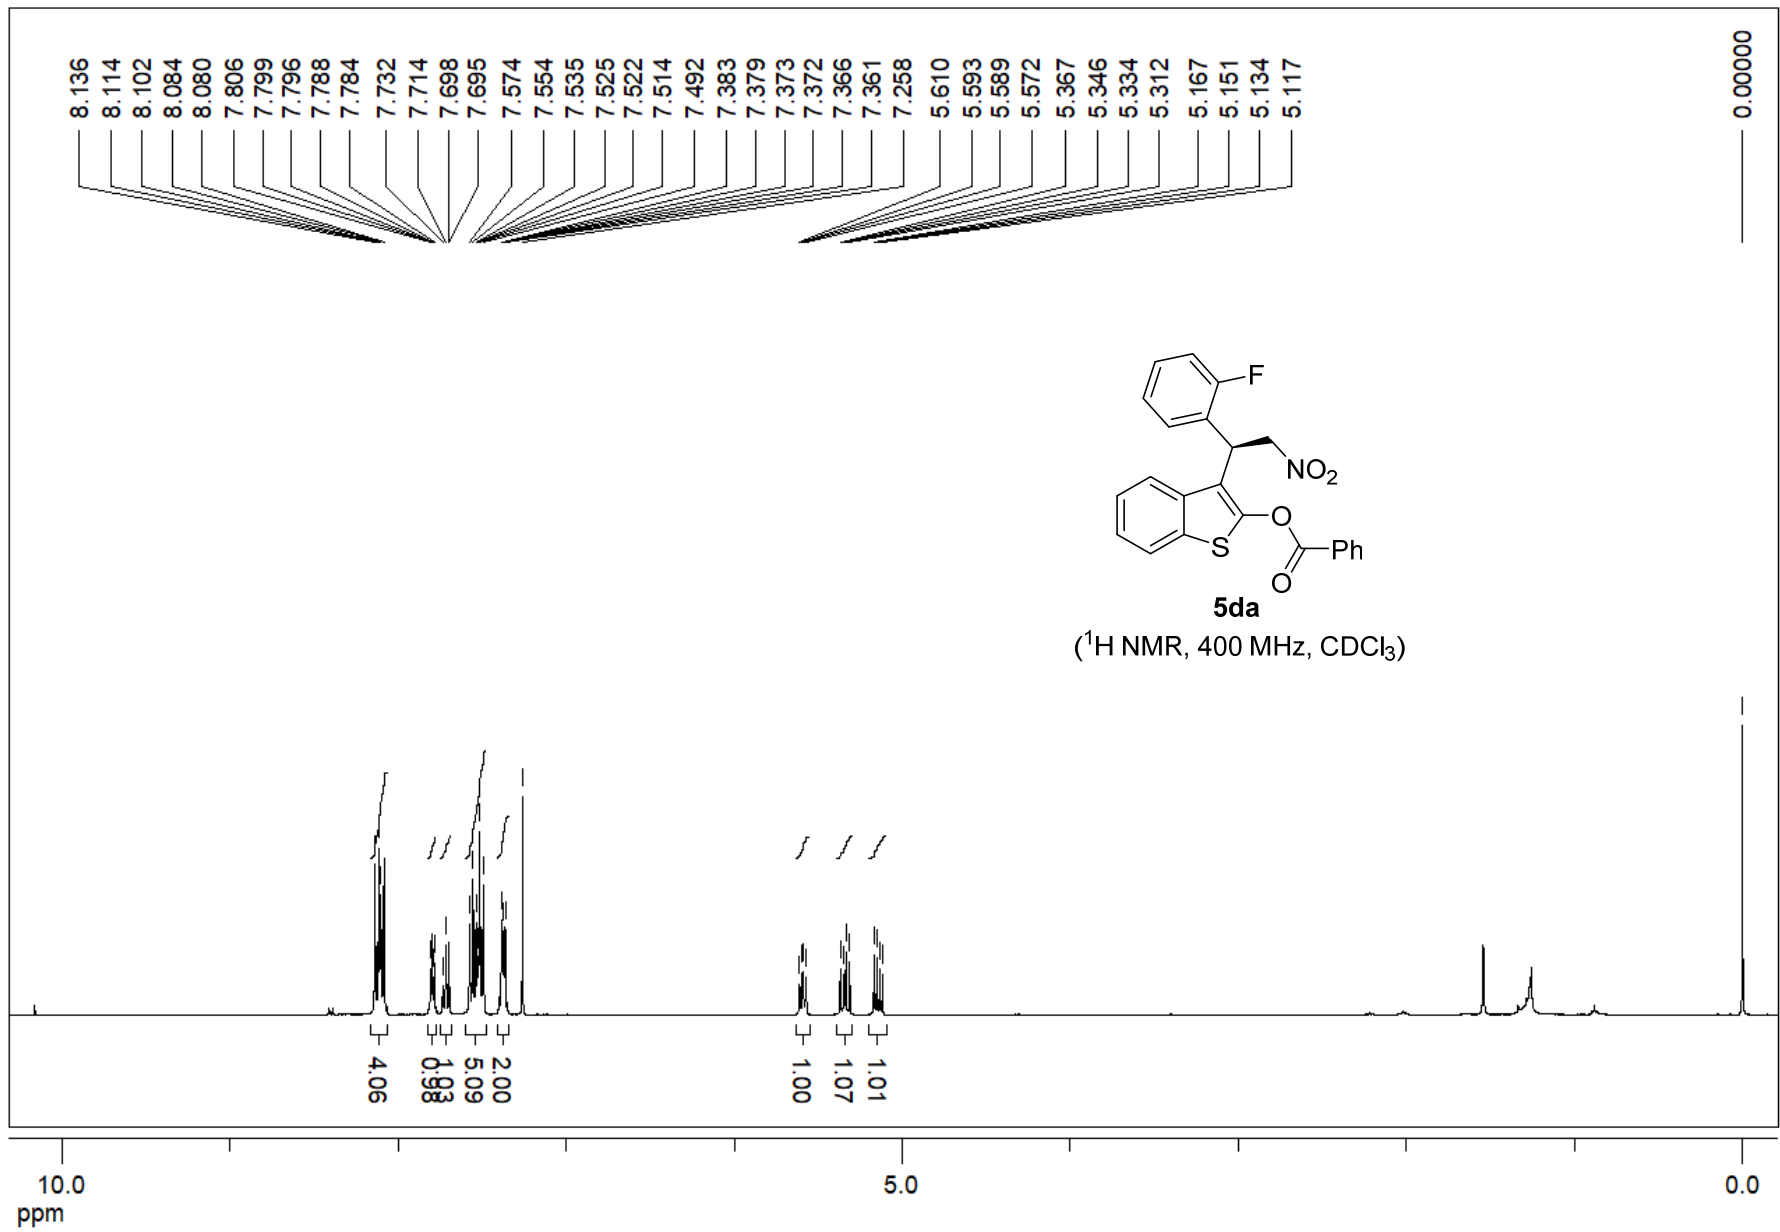

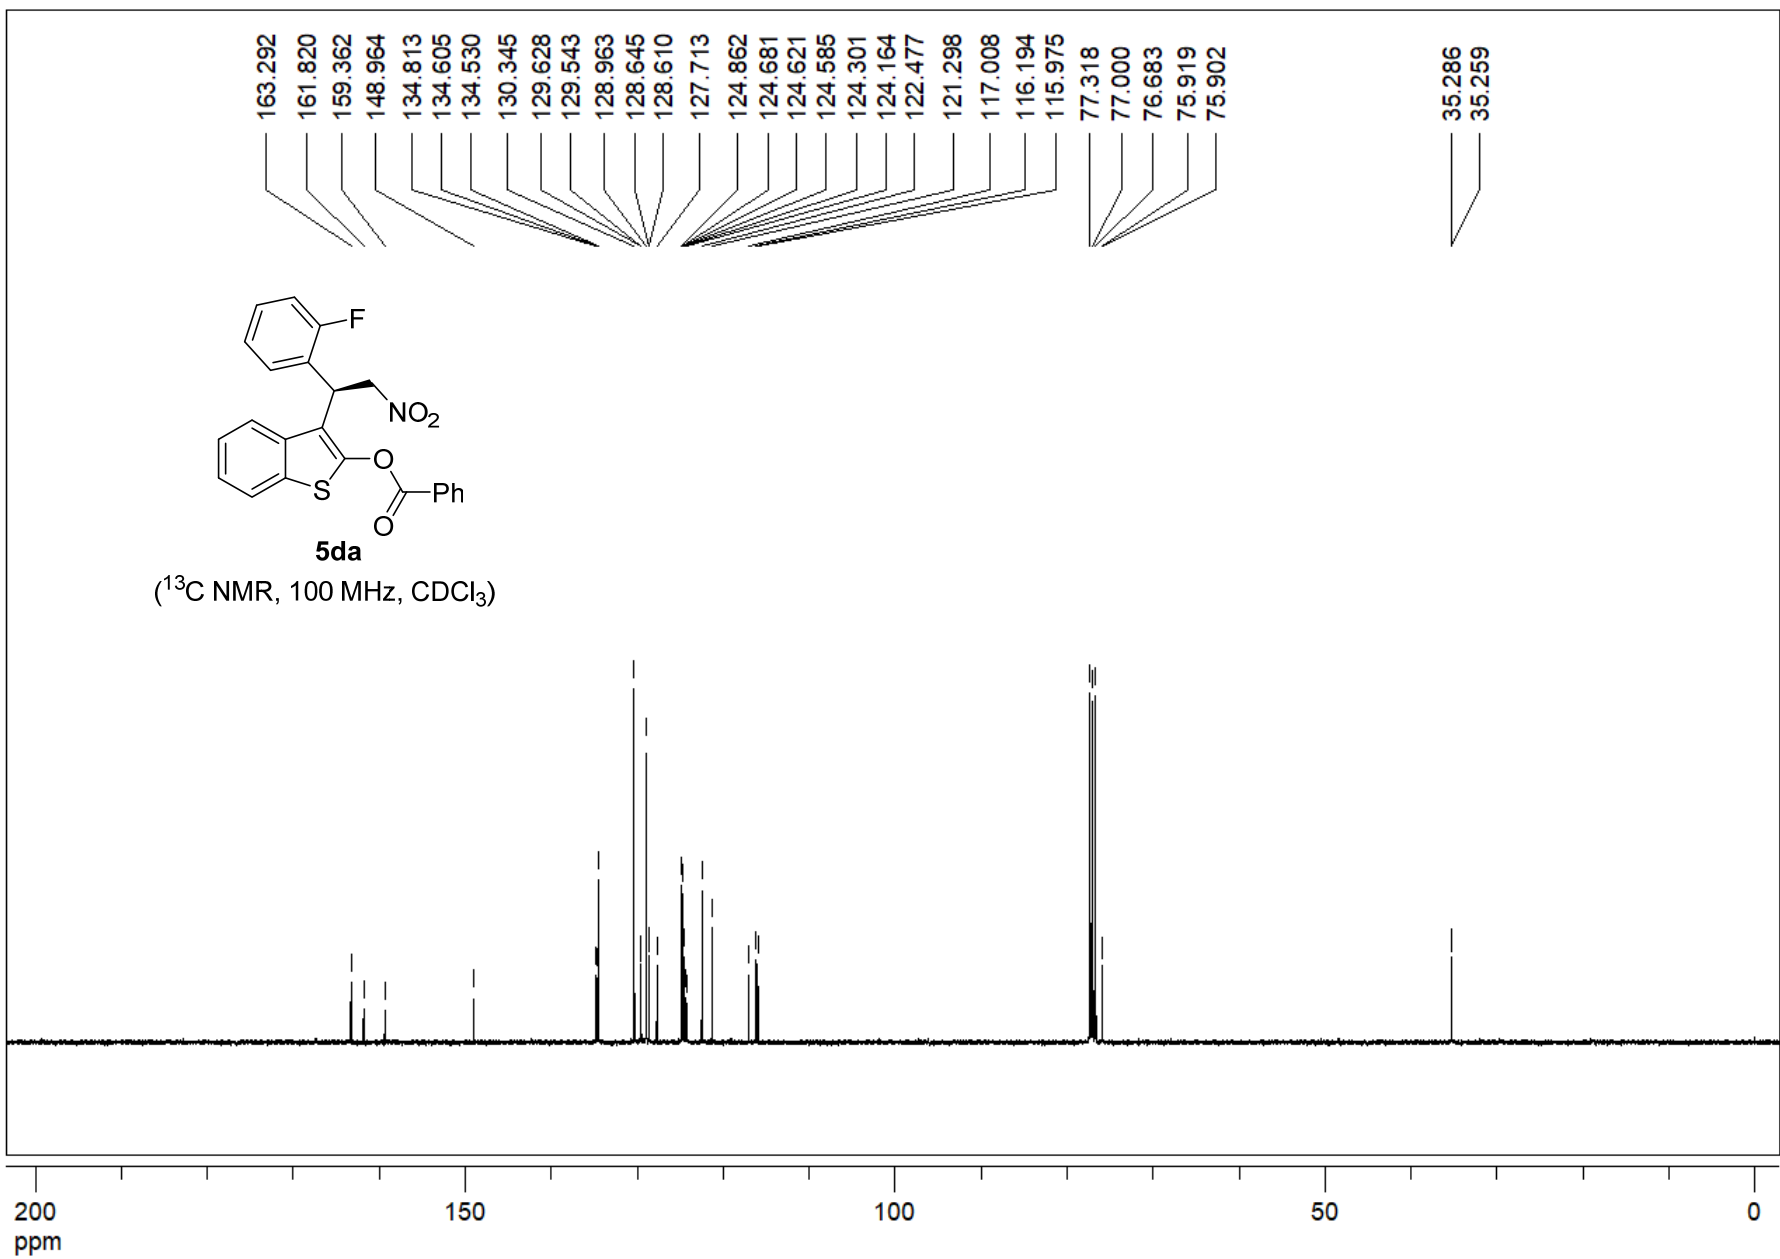

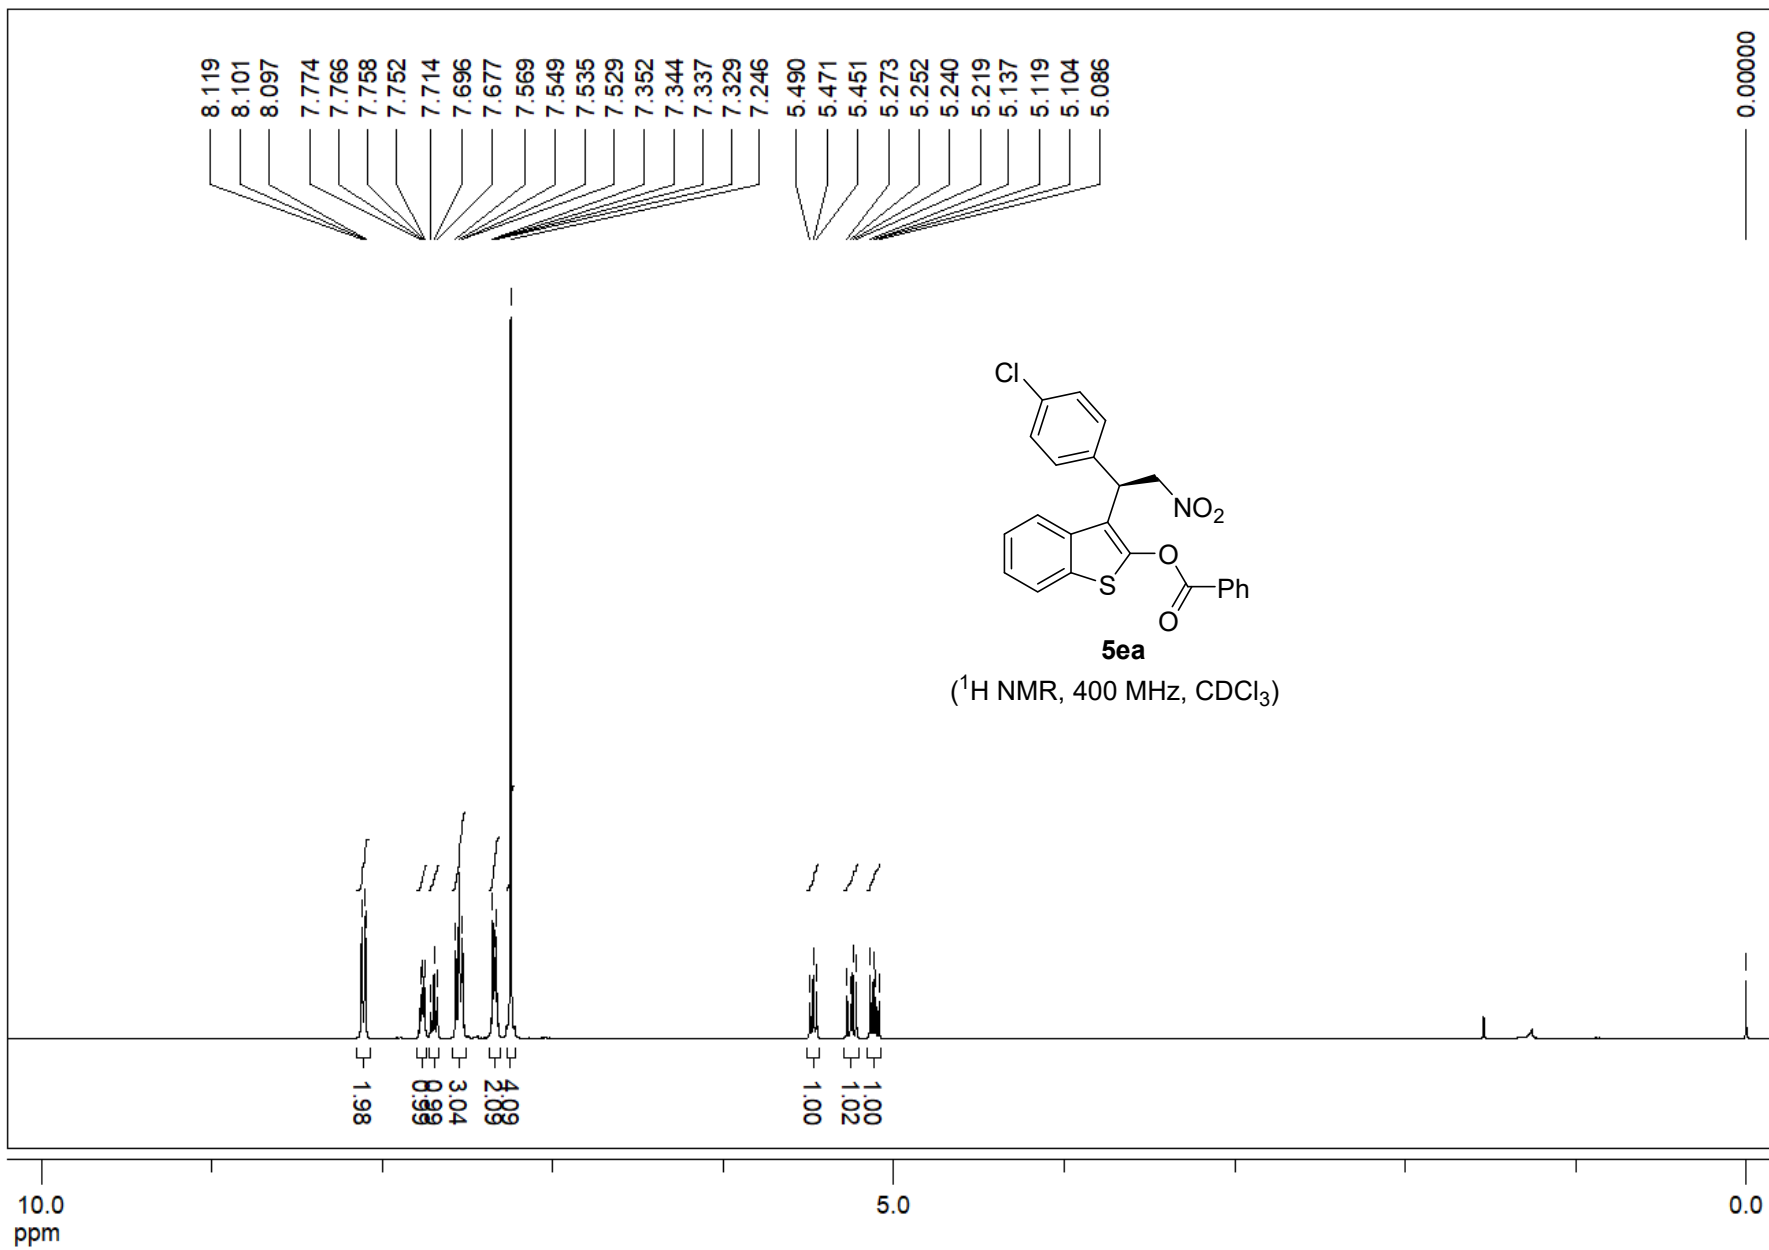

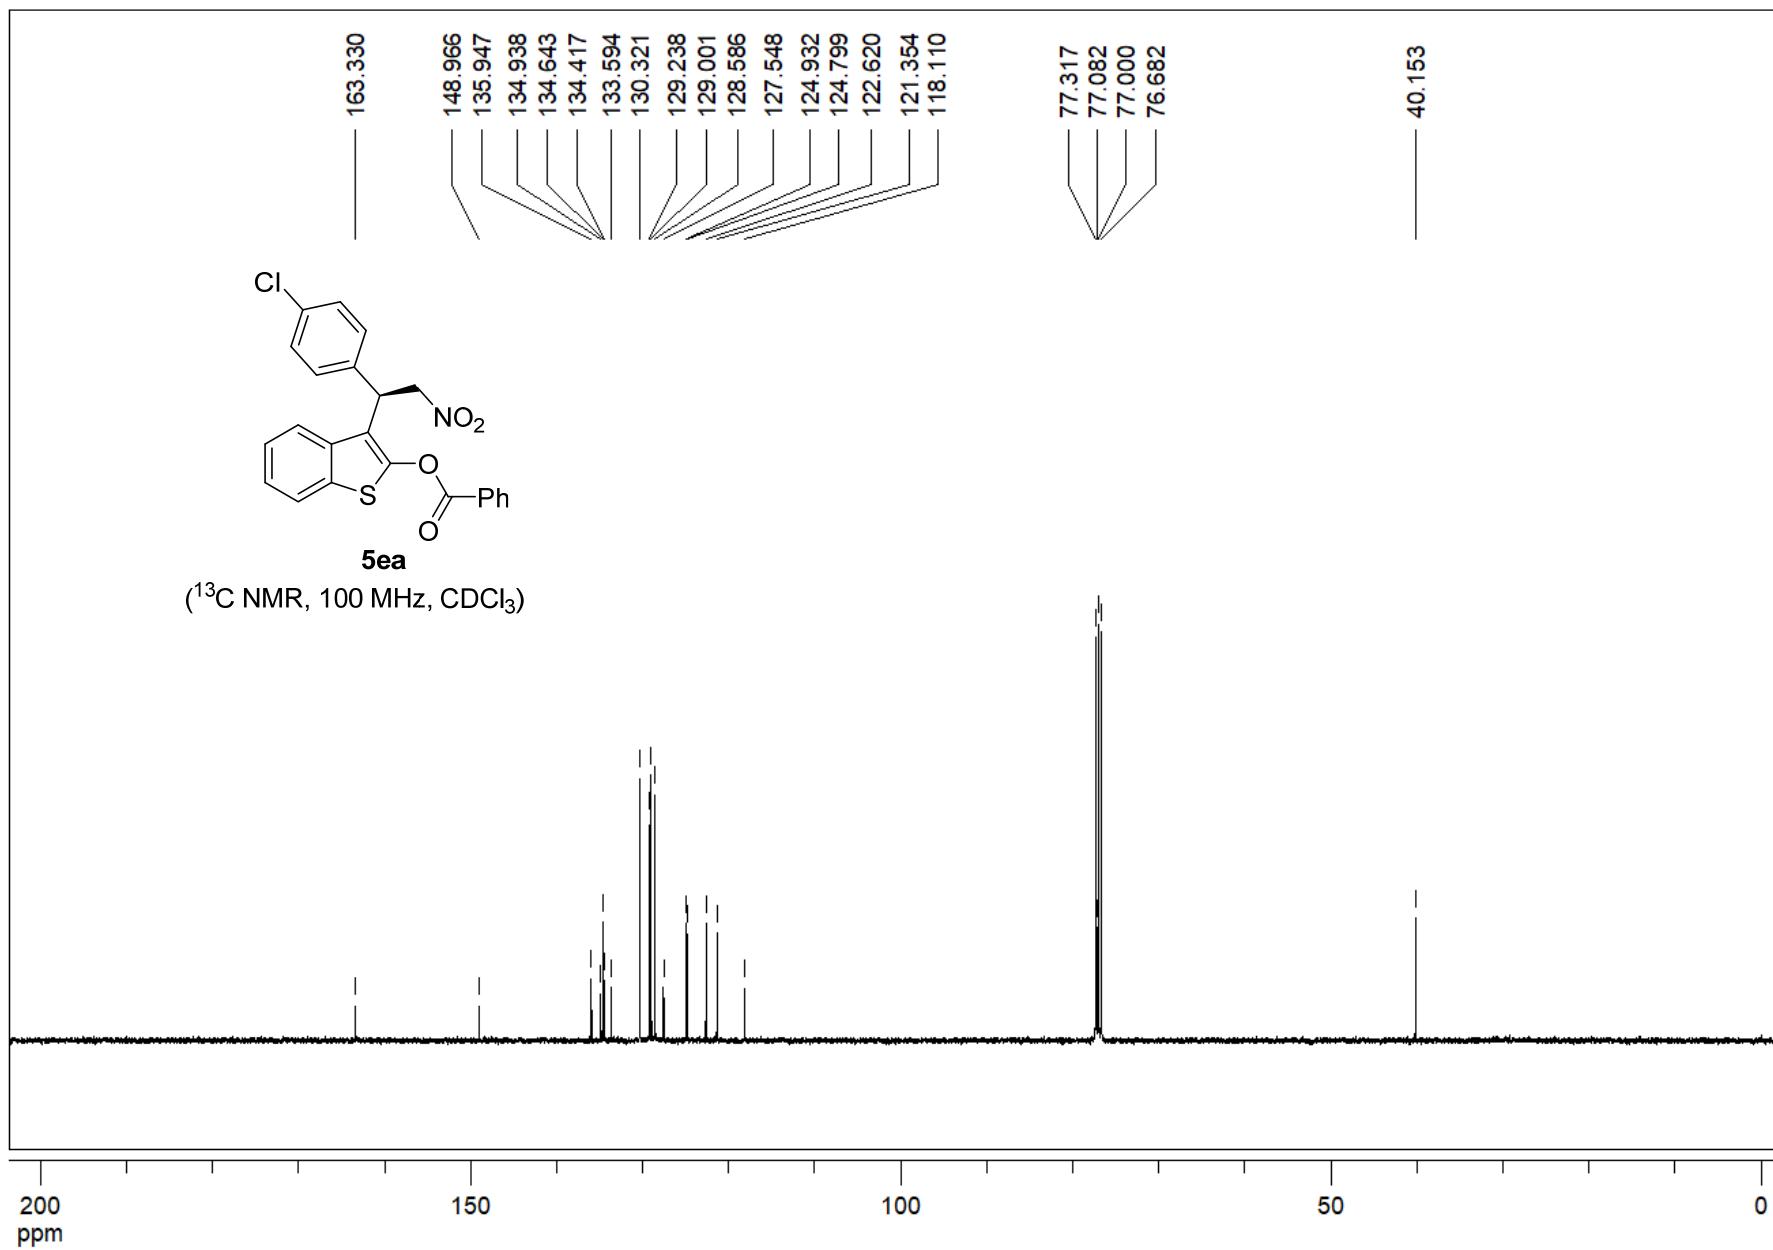

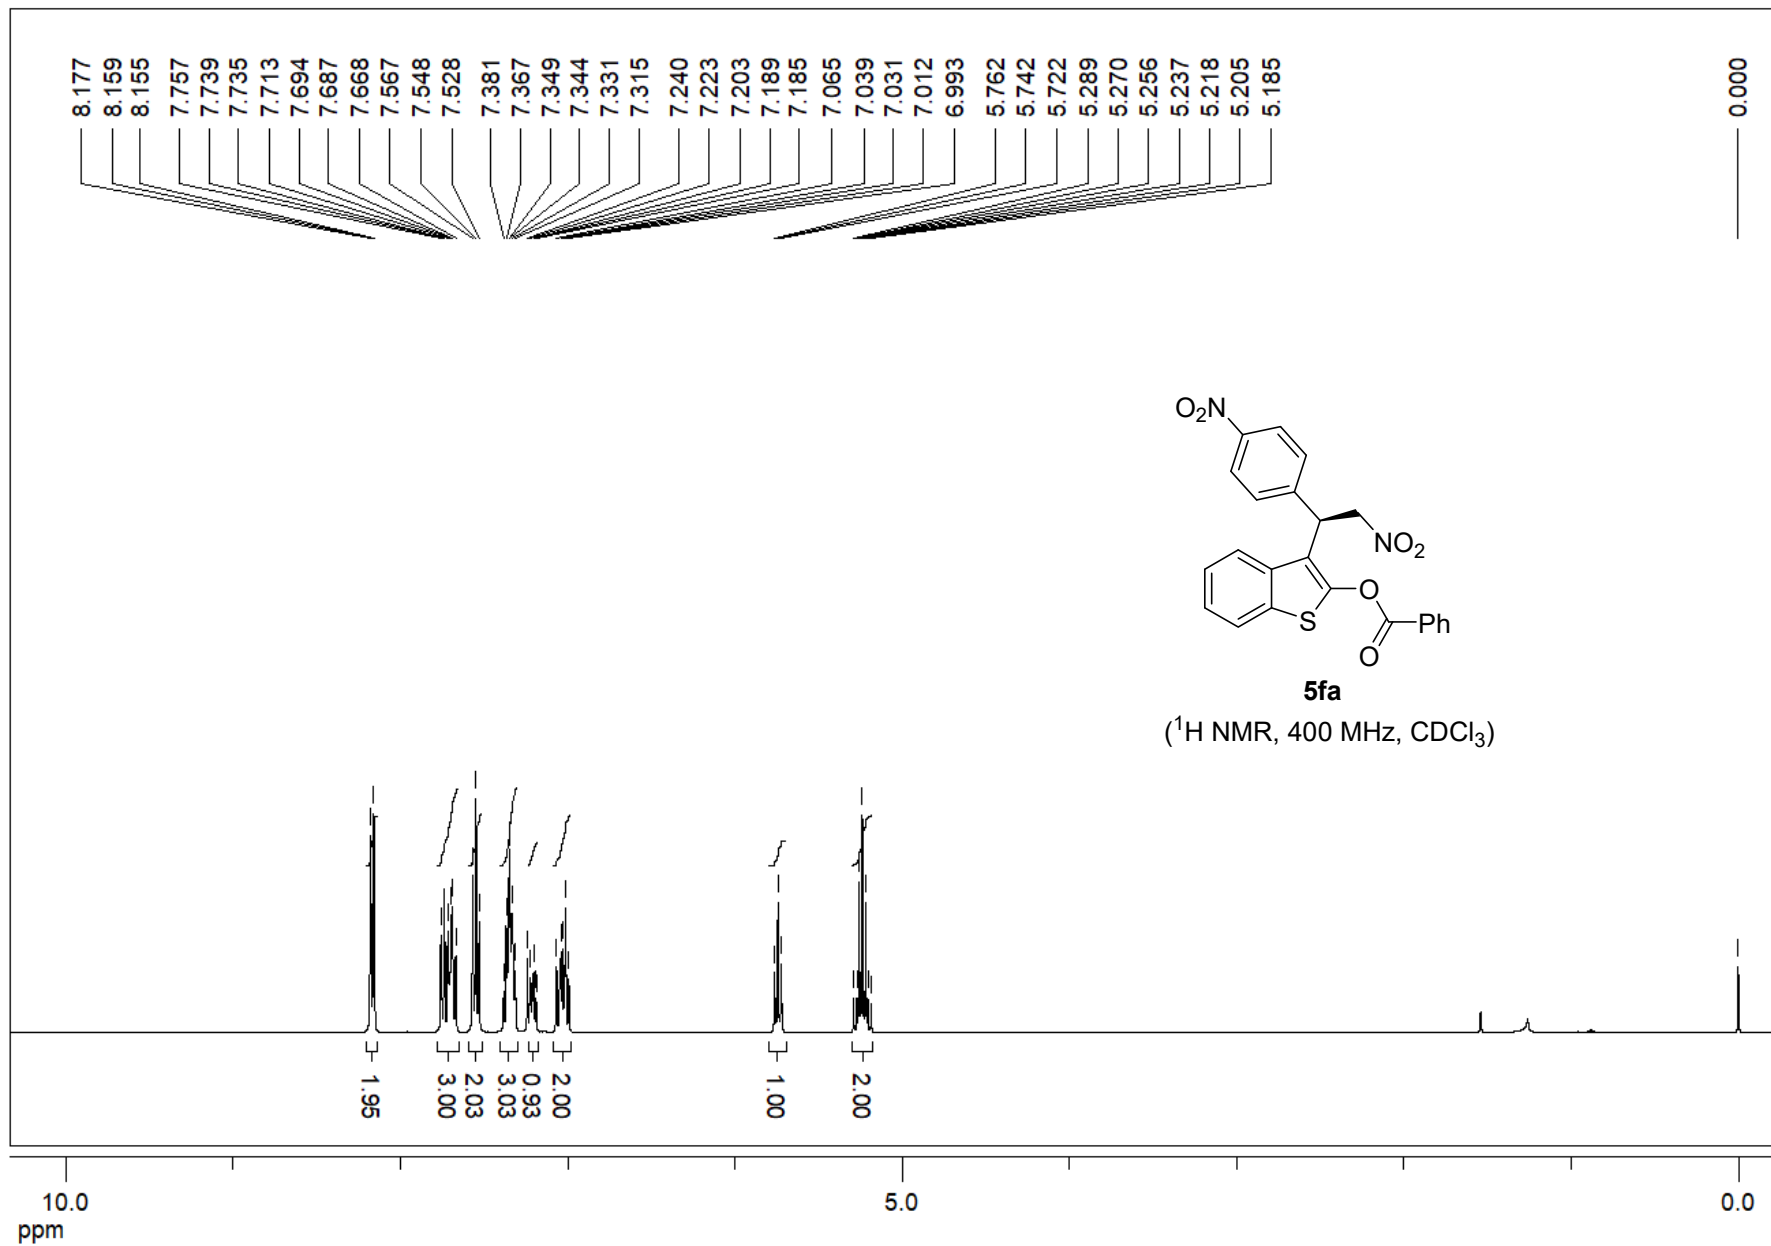

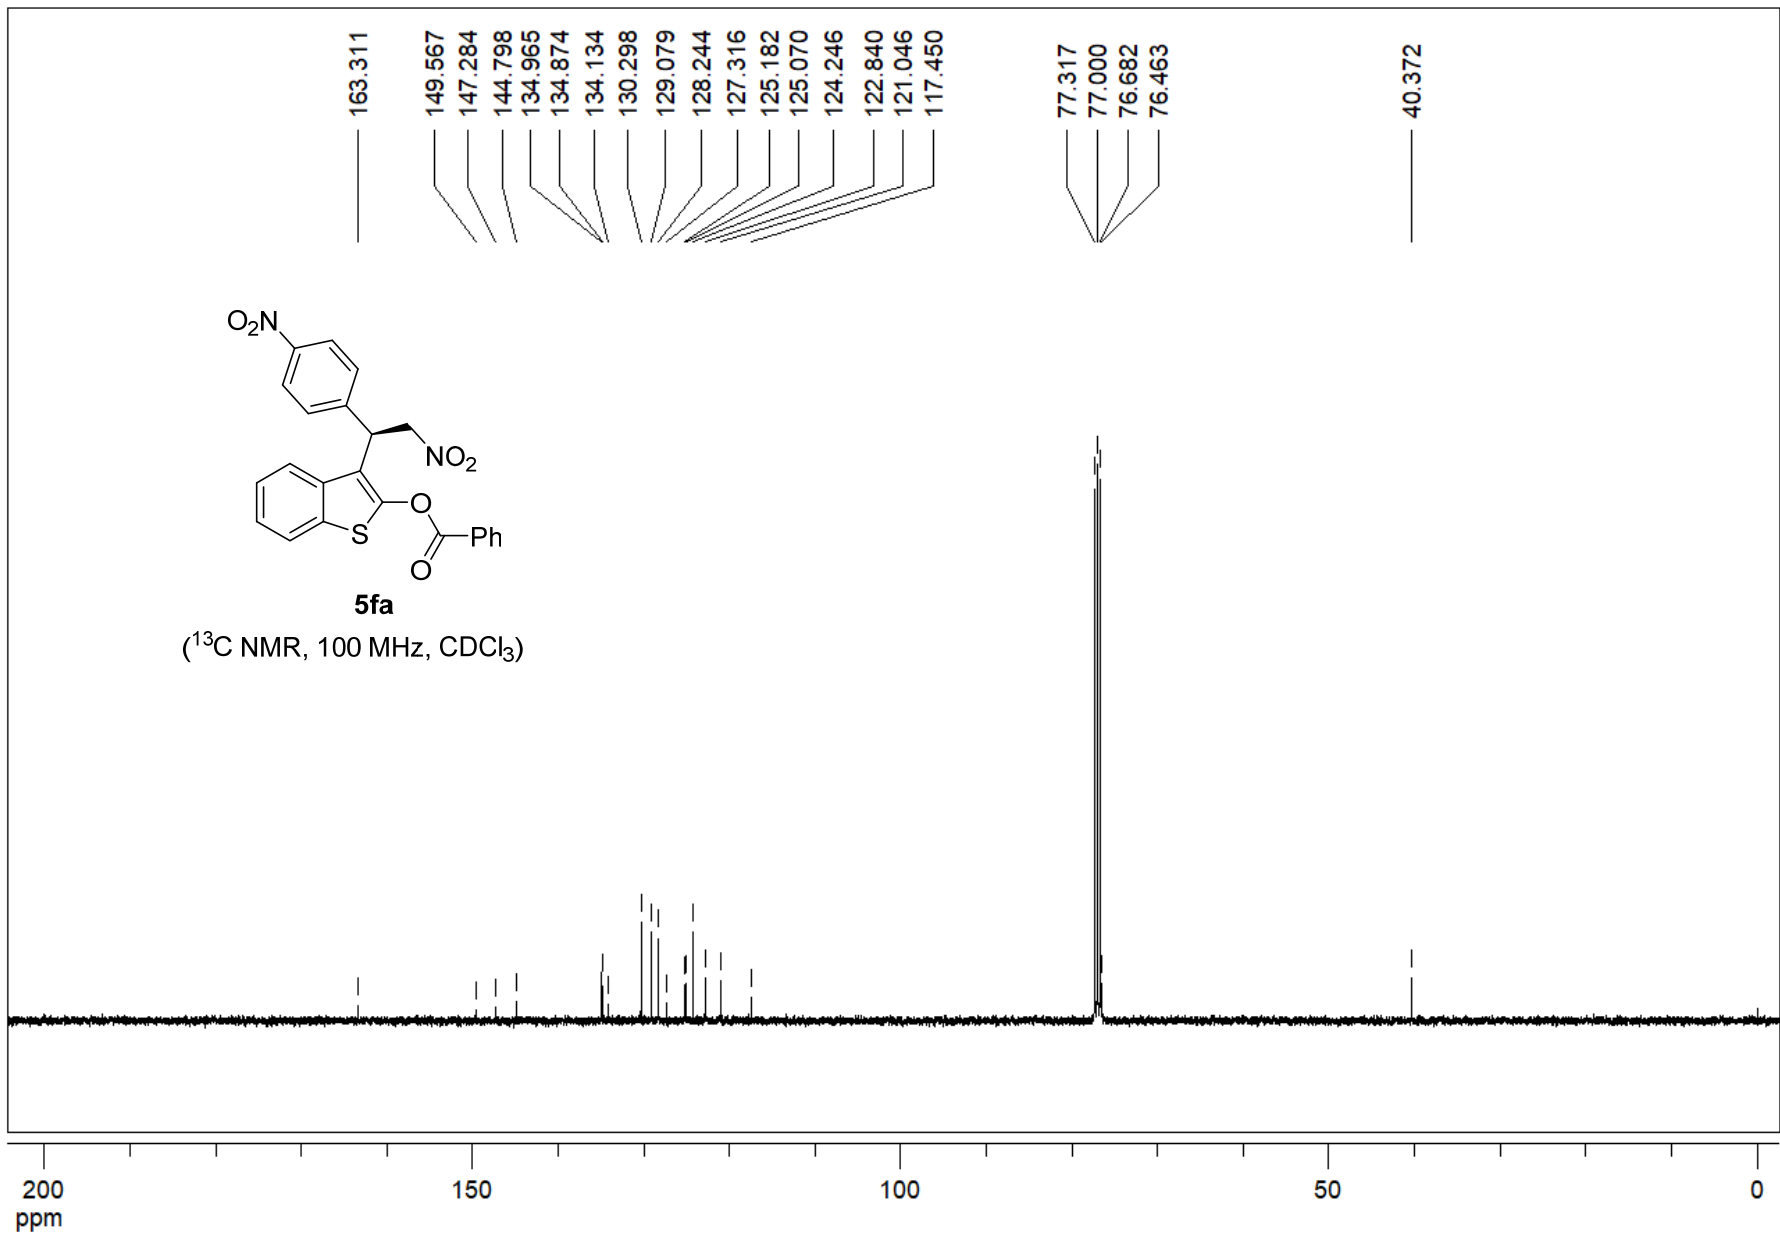

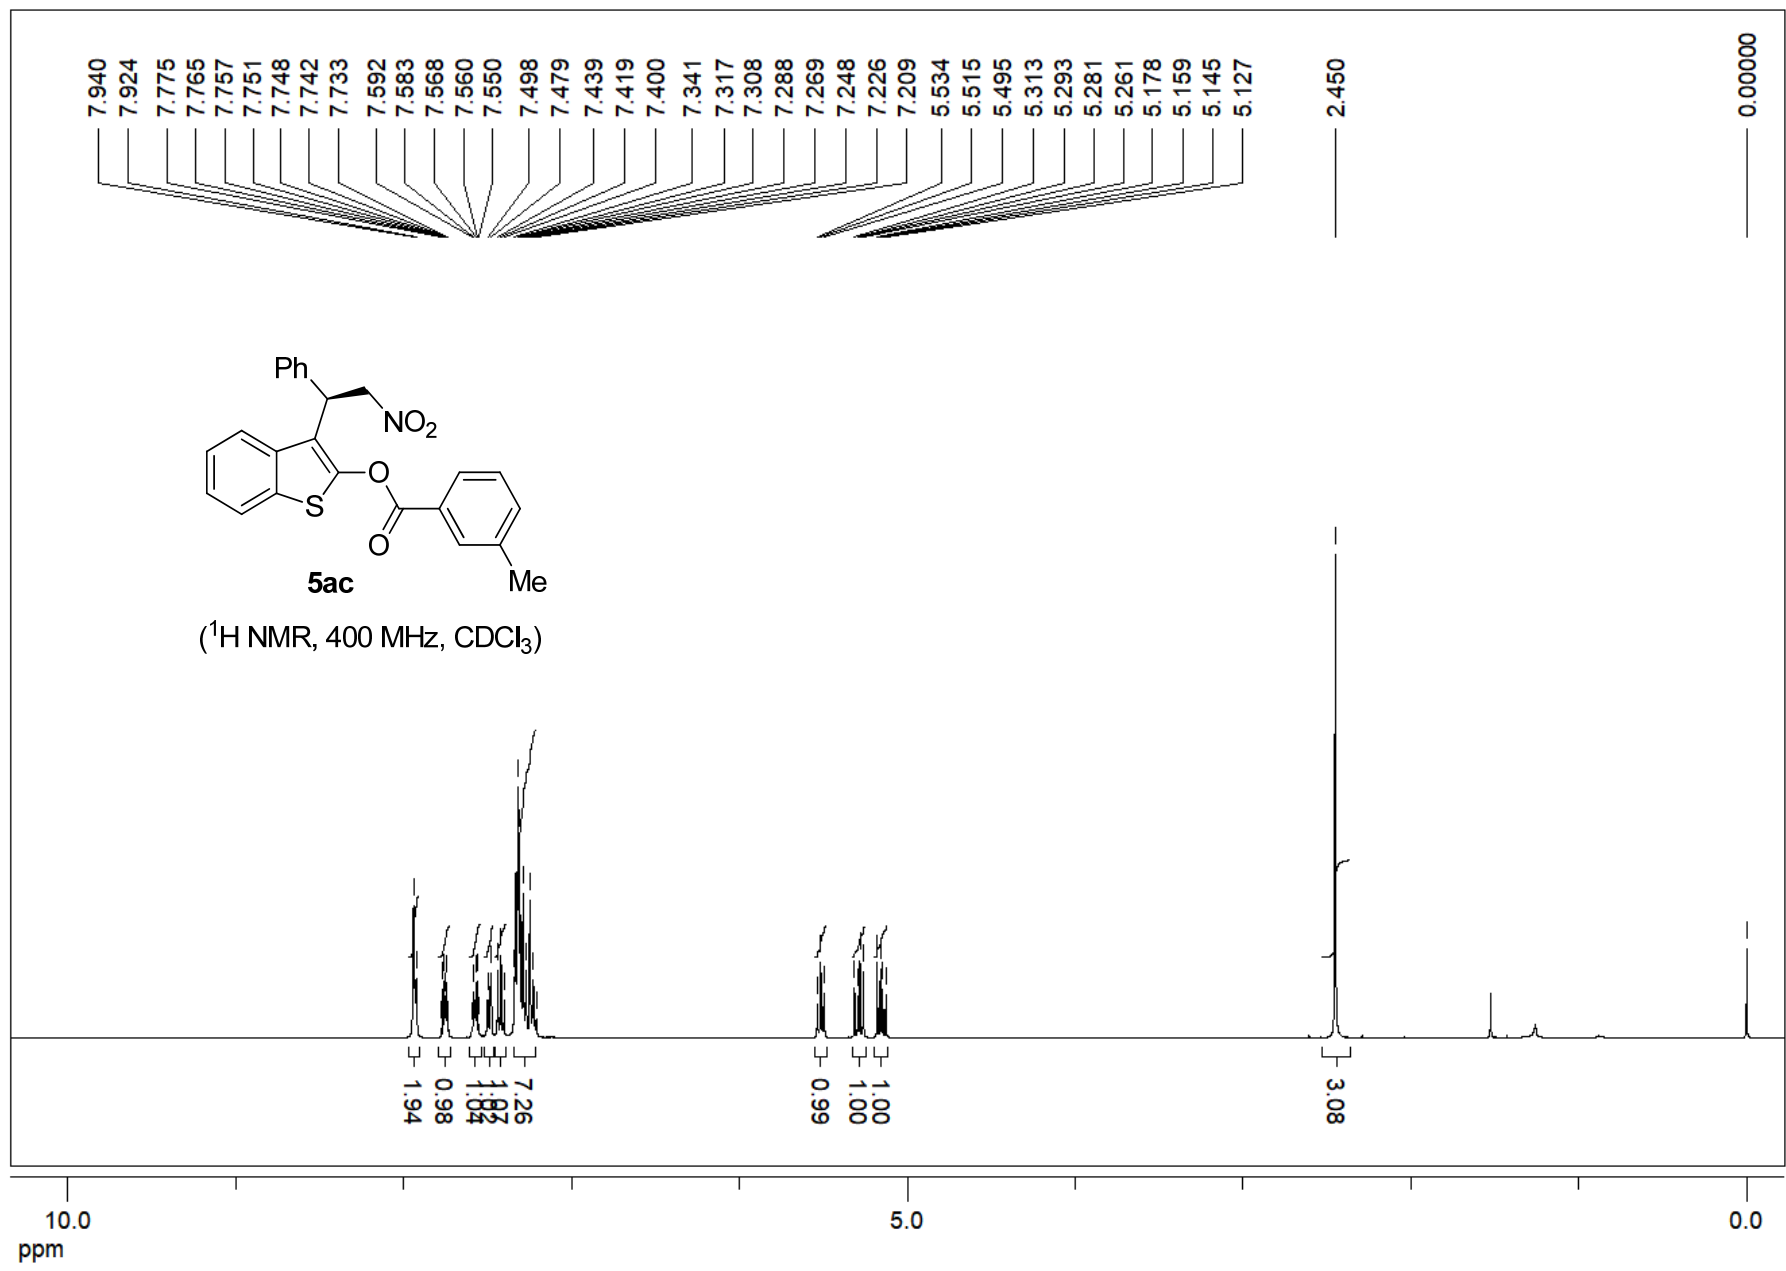

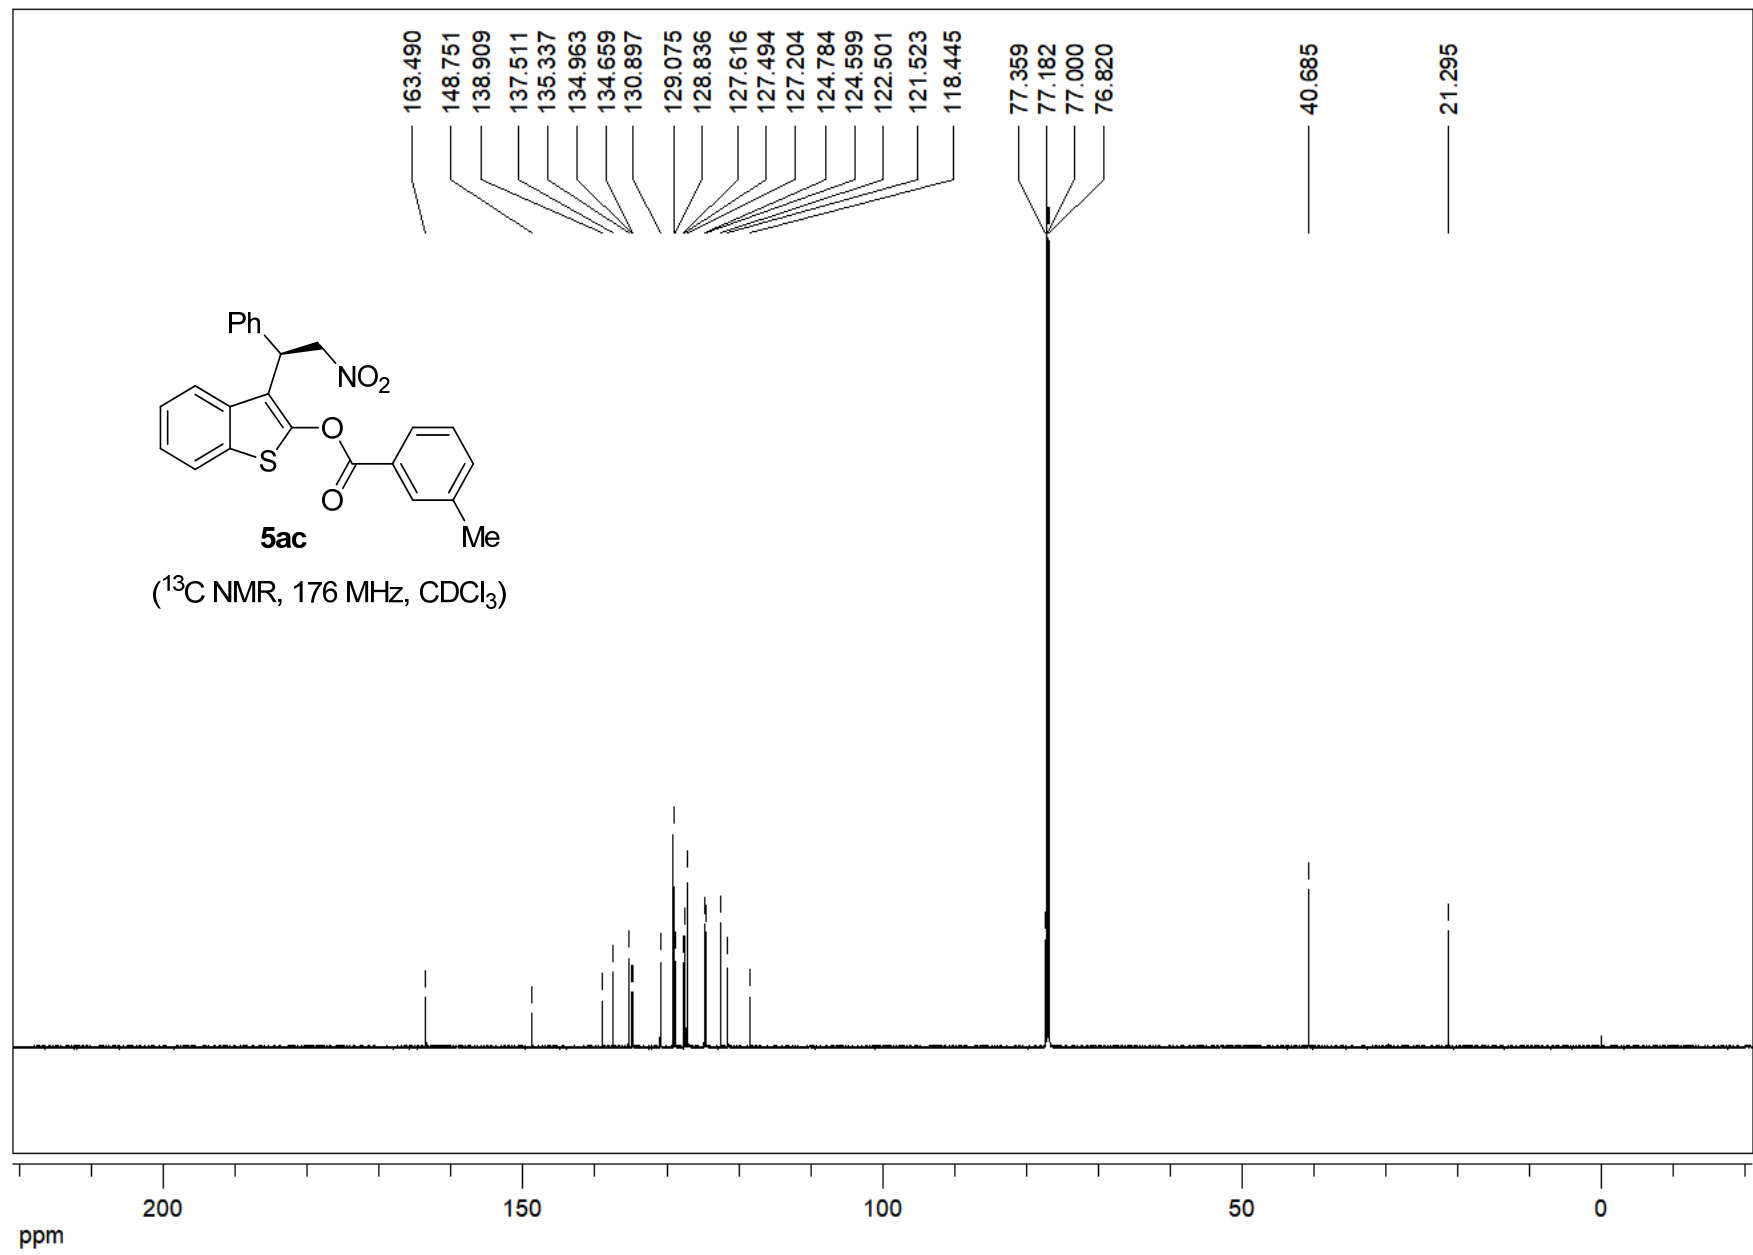



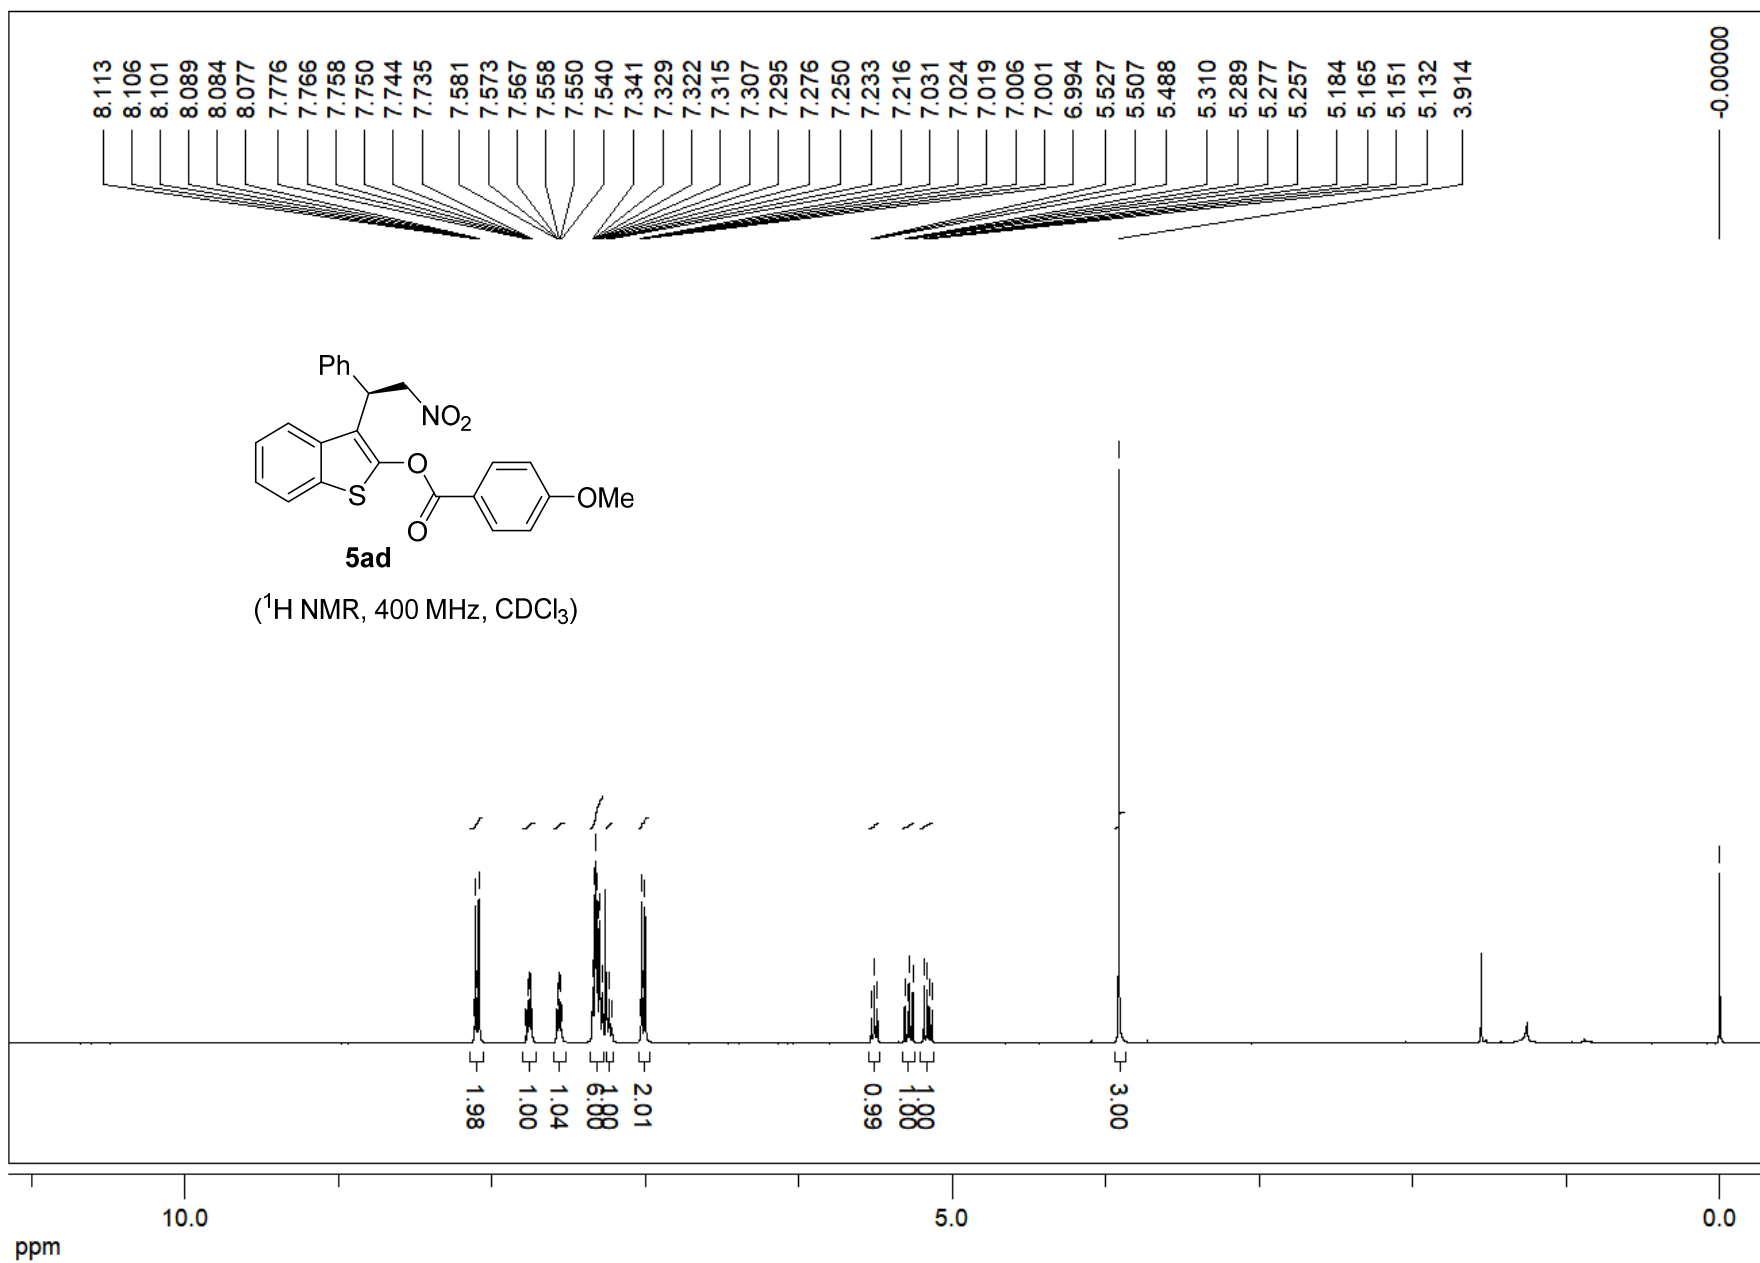

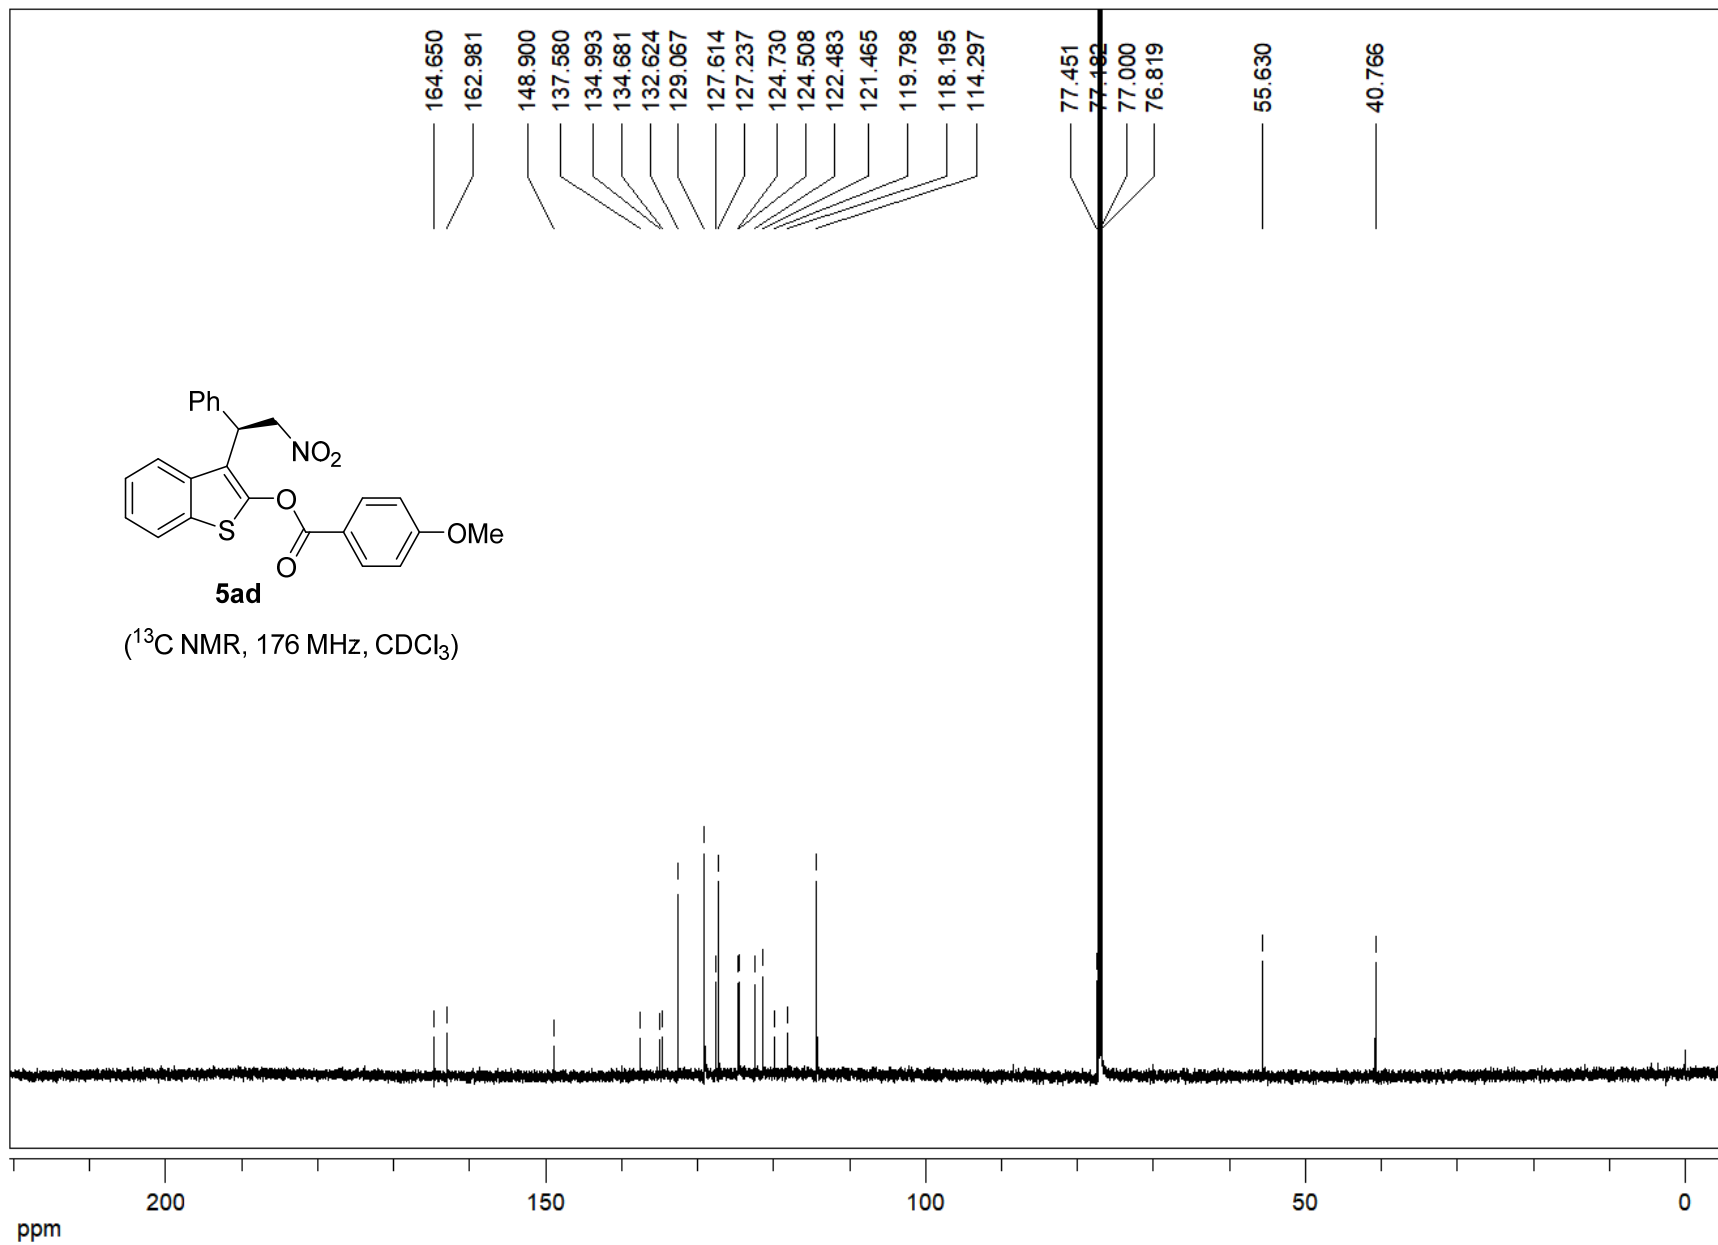

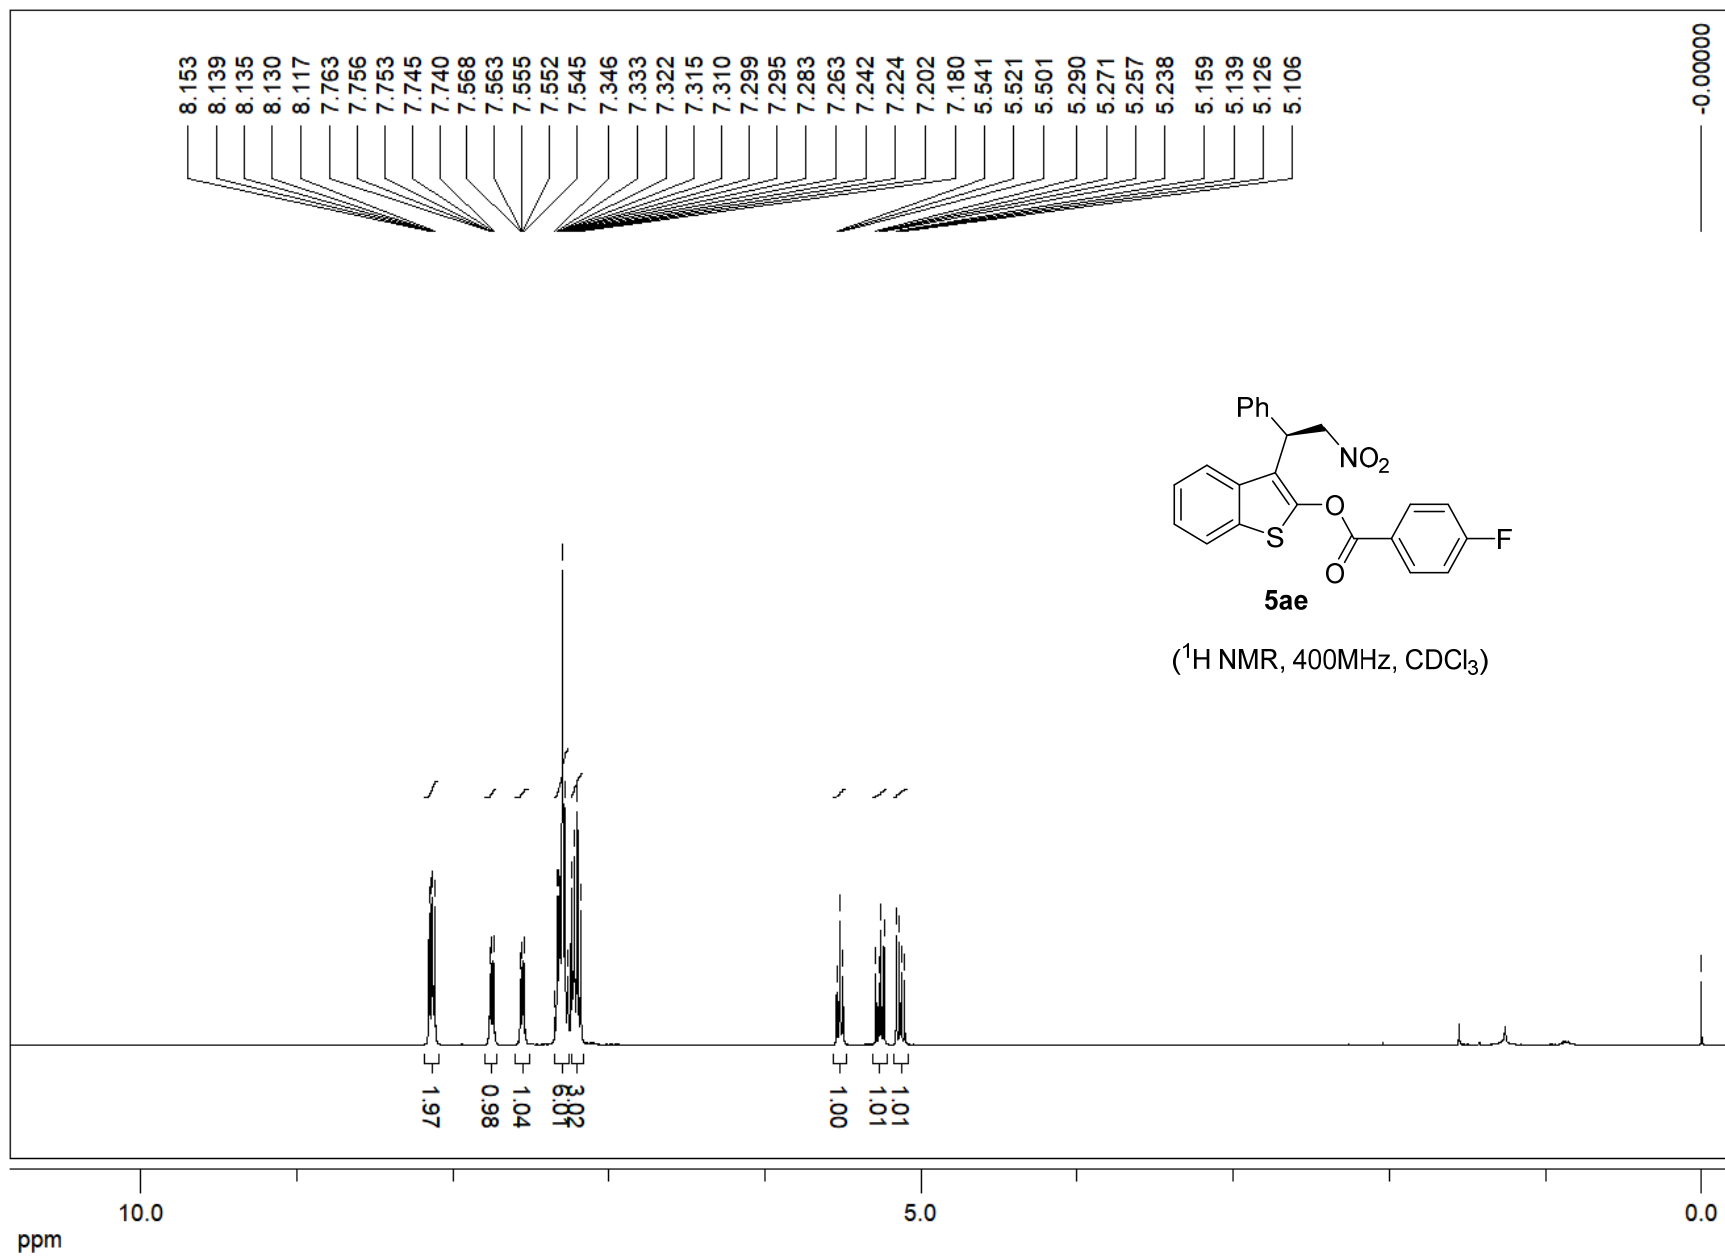

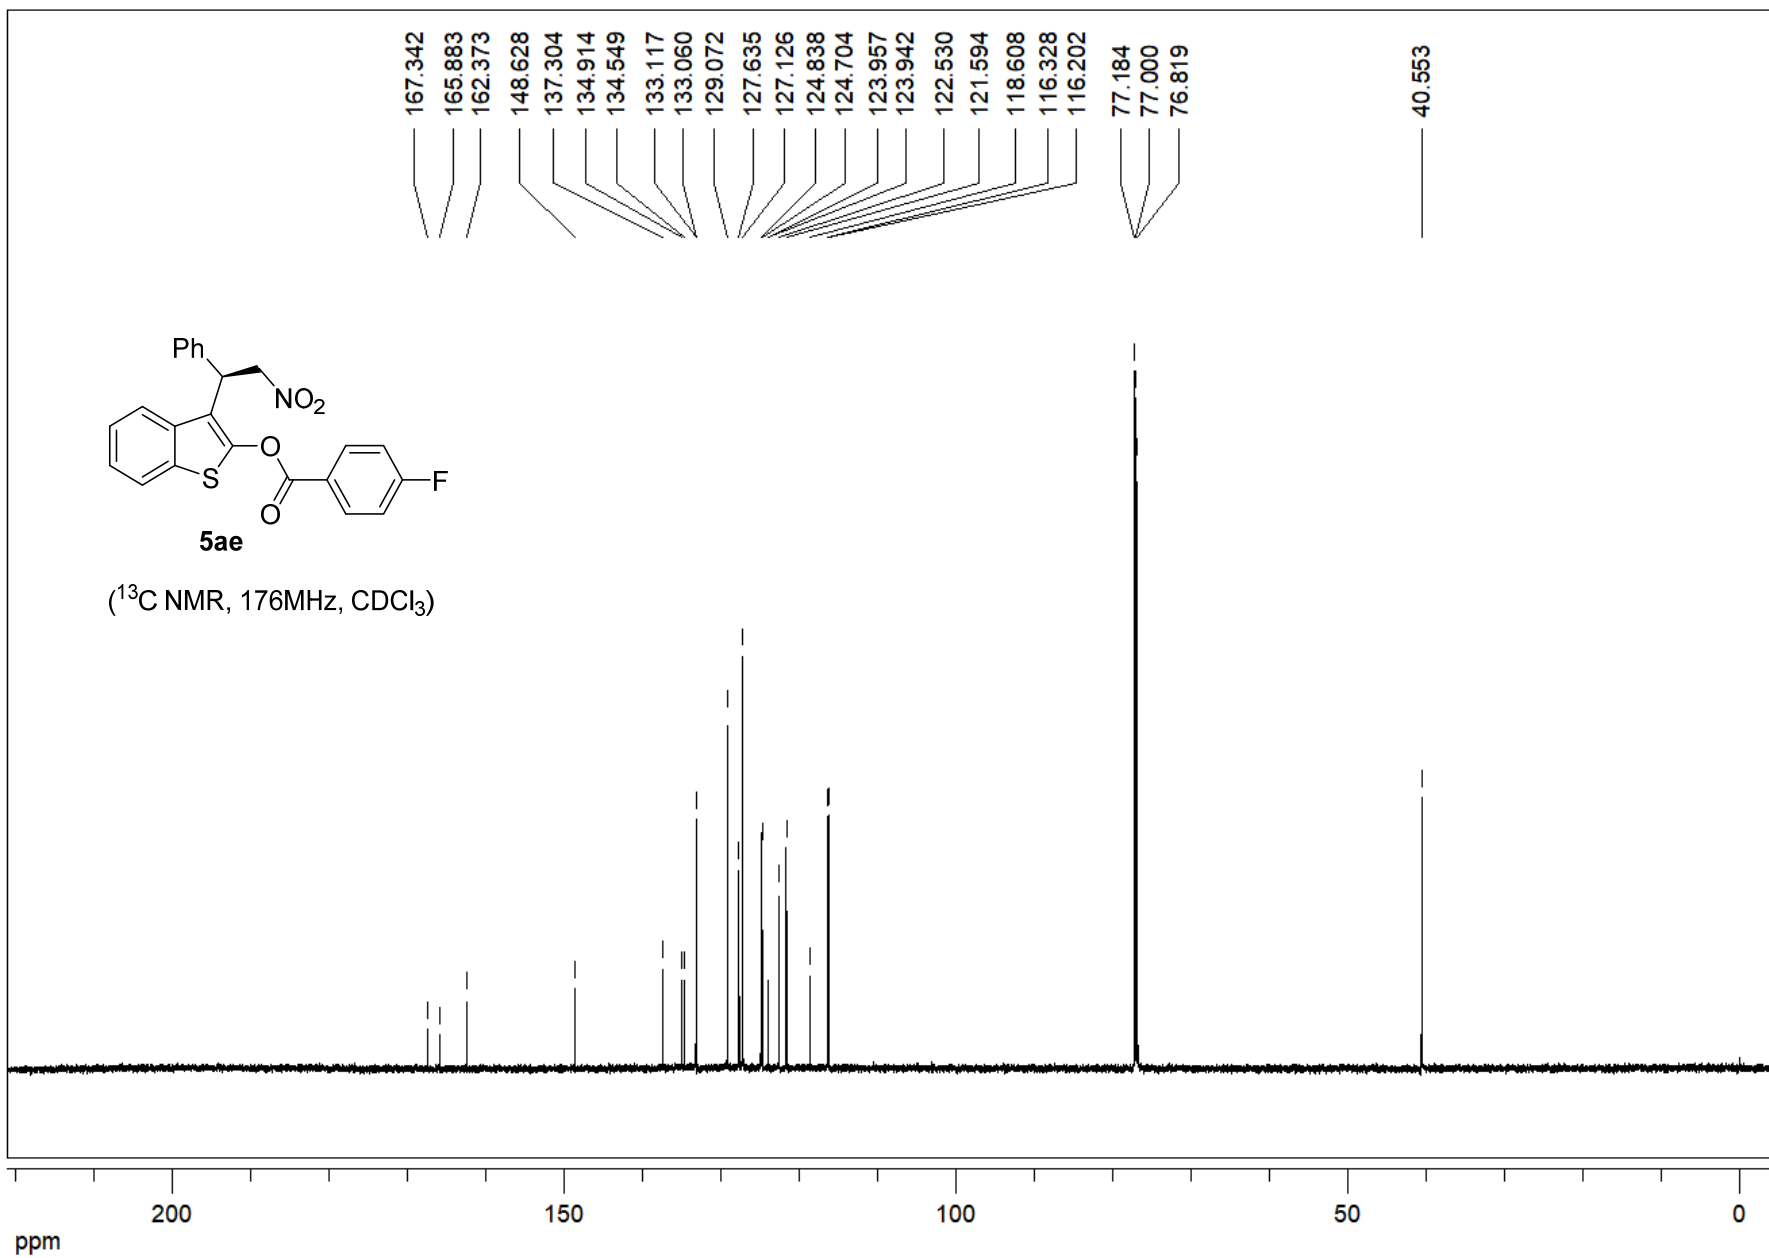

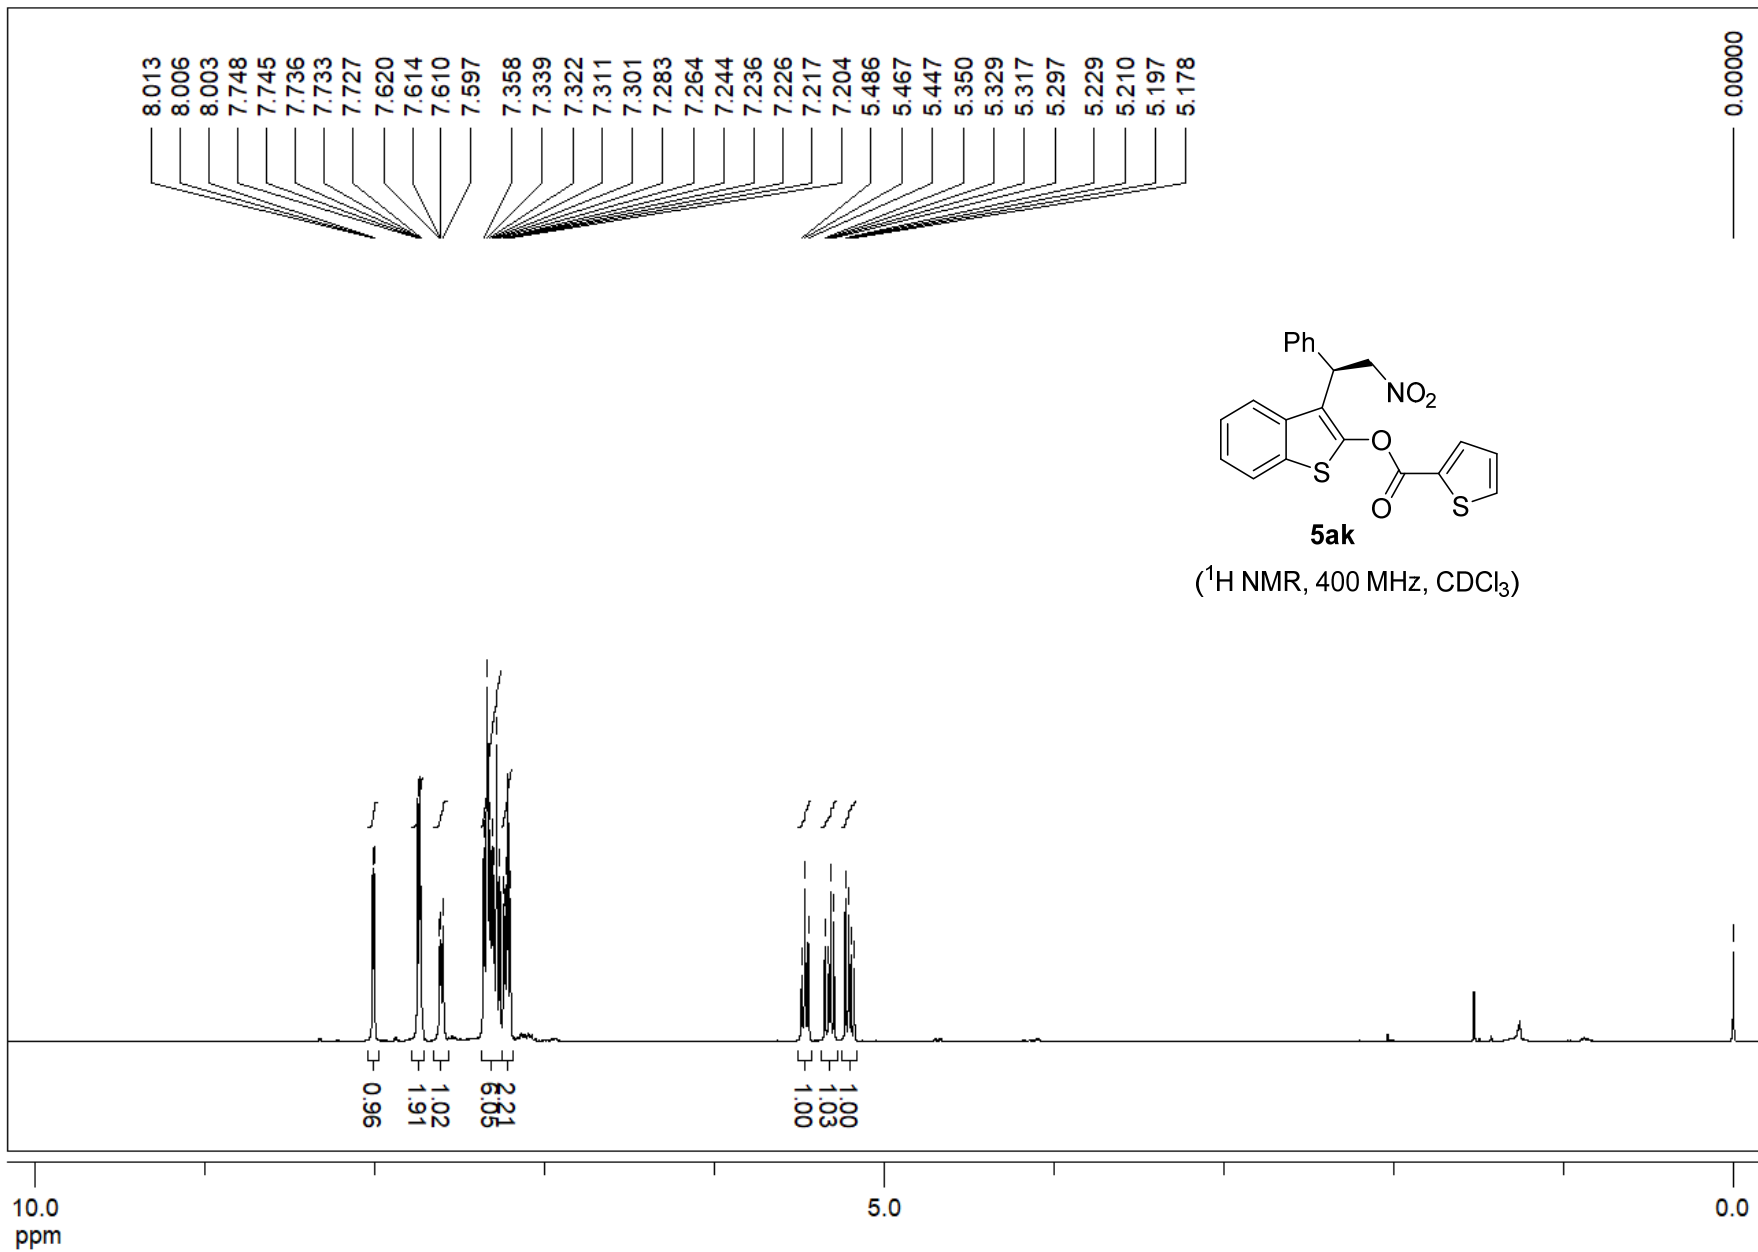

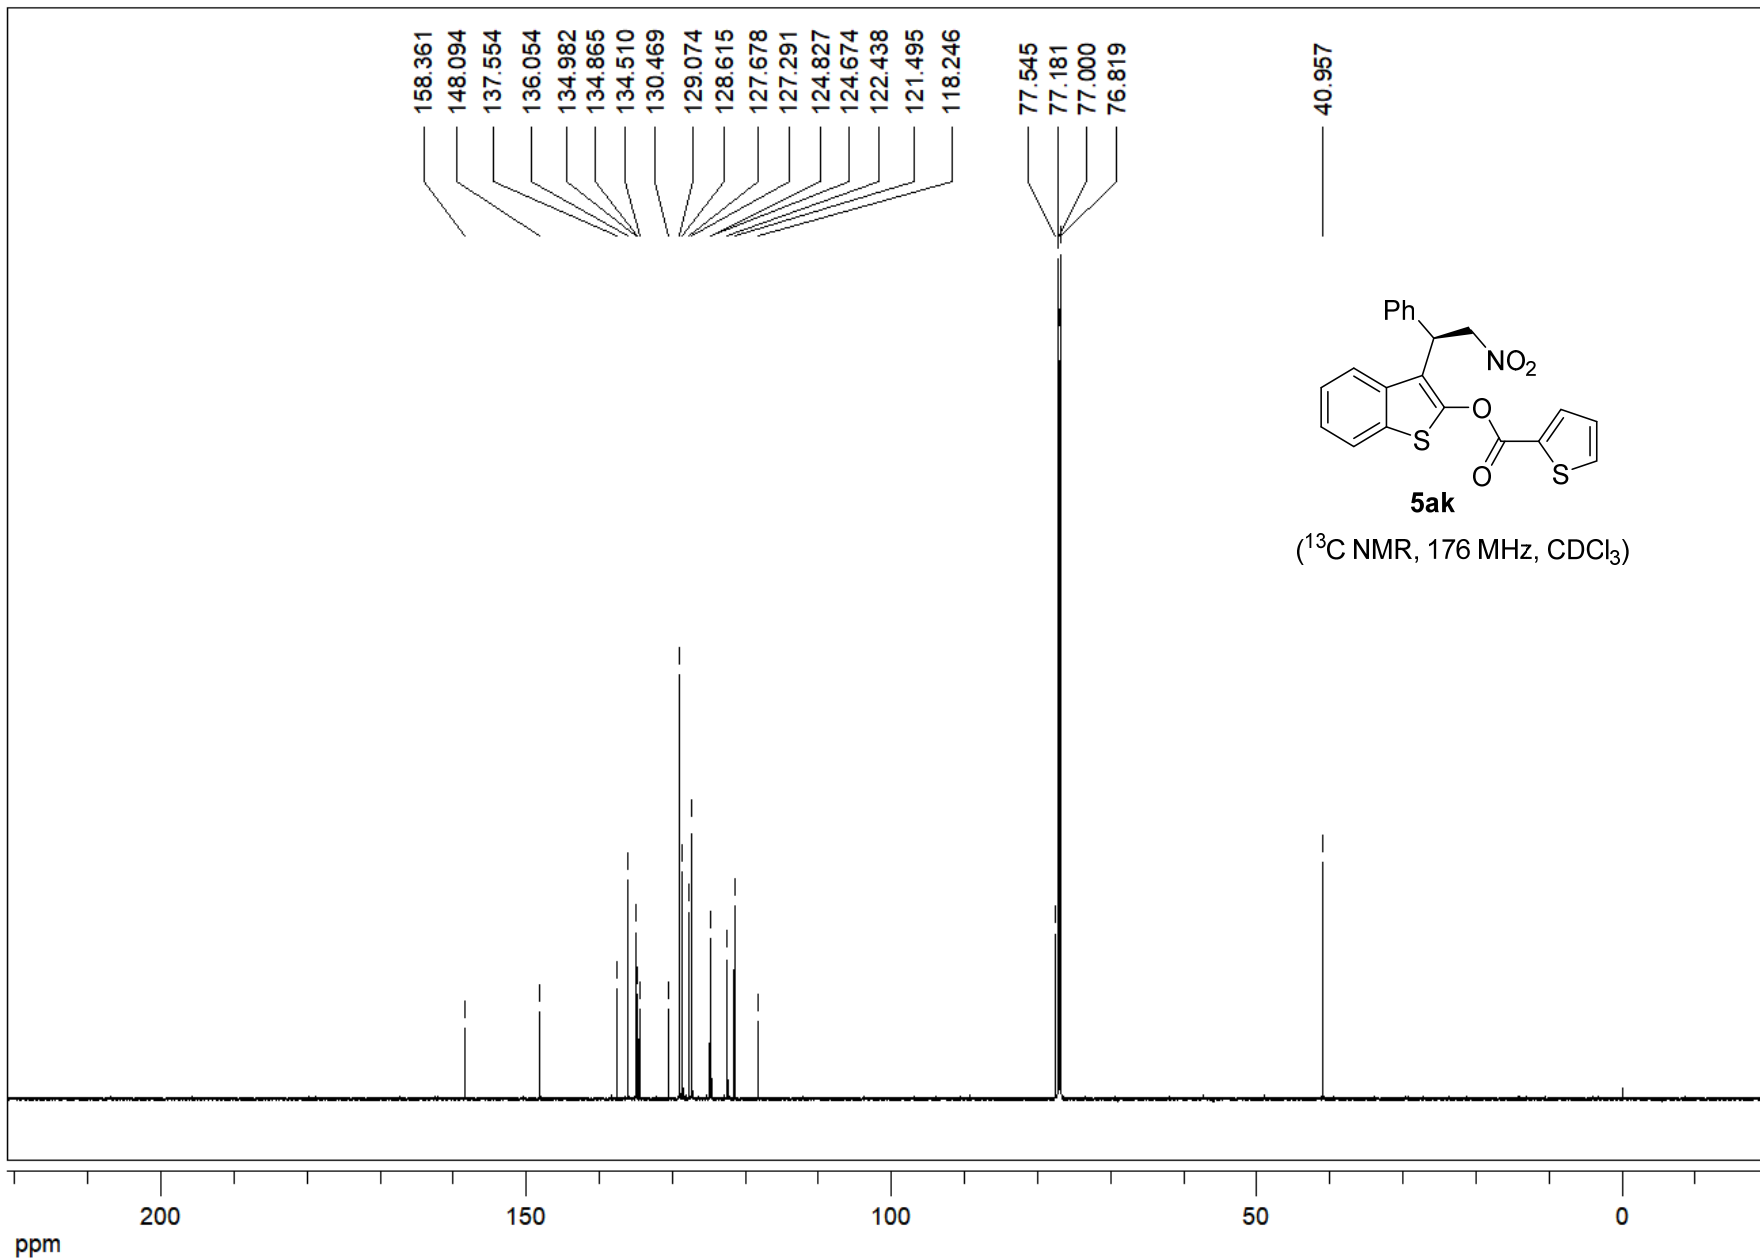

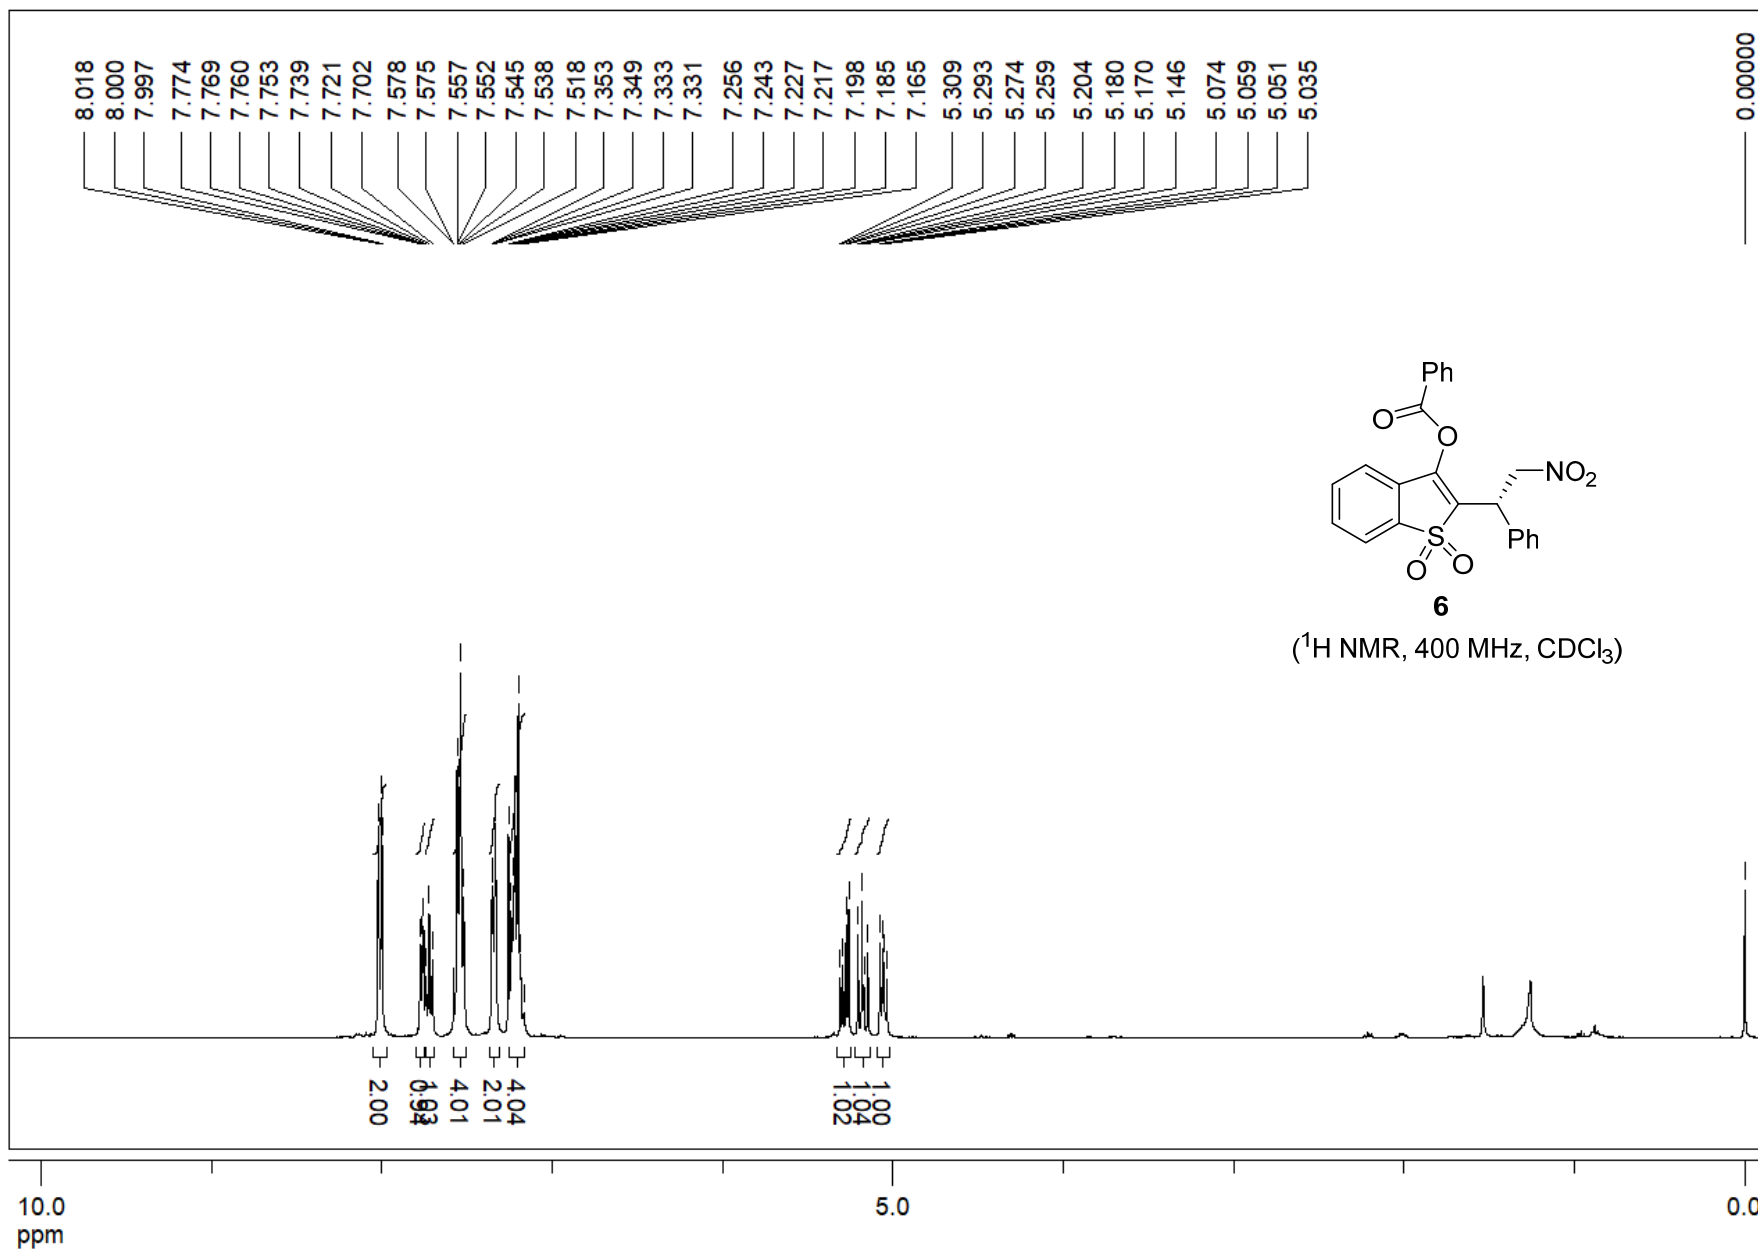

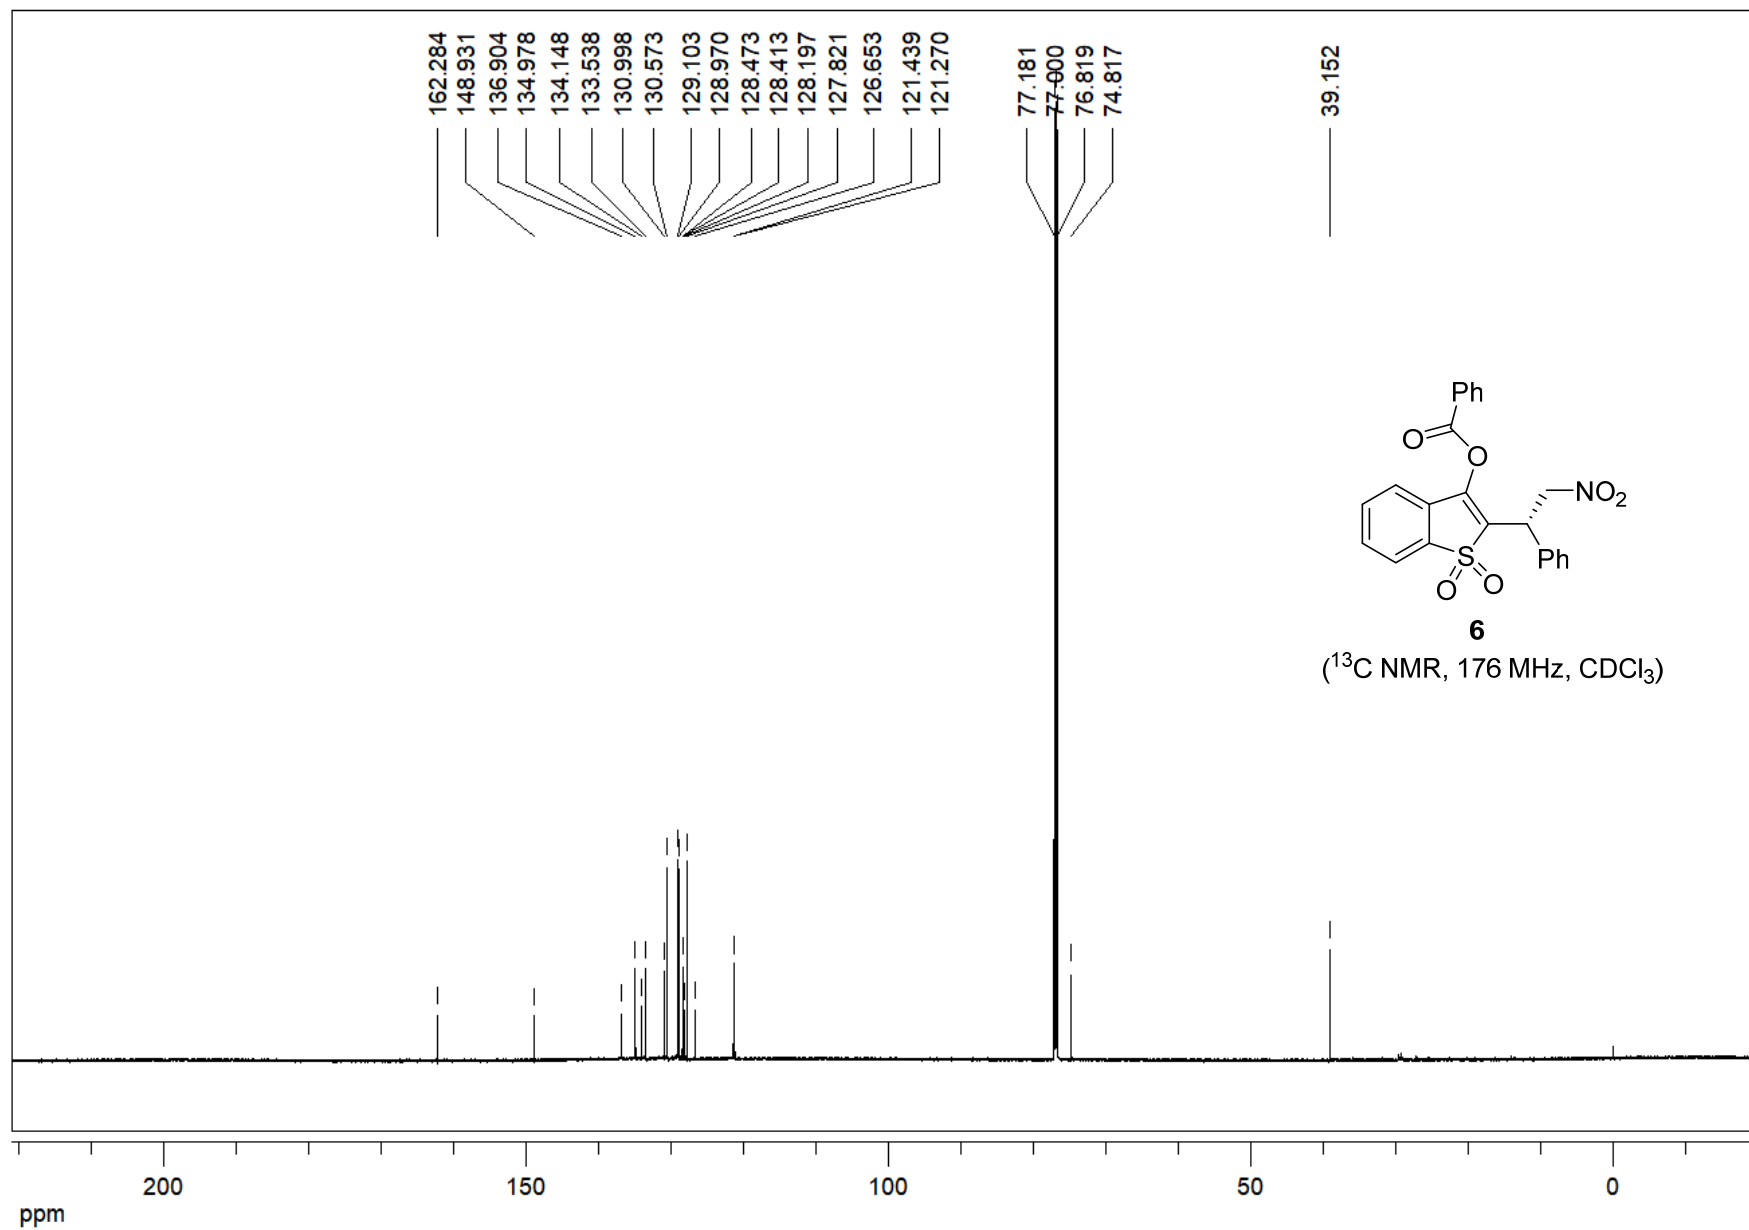



## 7. Copies of HPLC chromatograms of new products

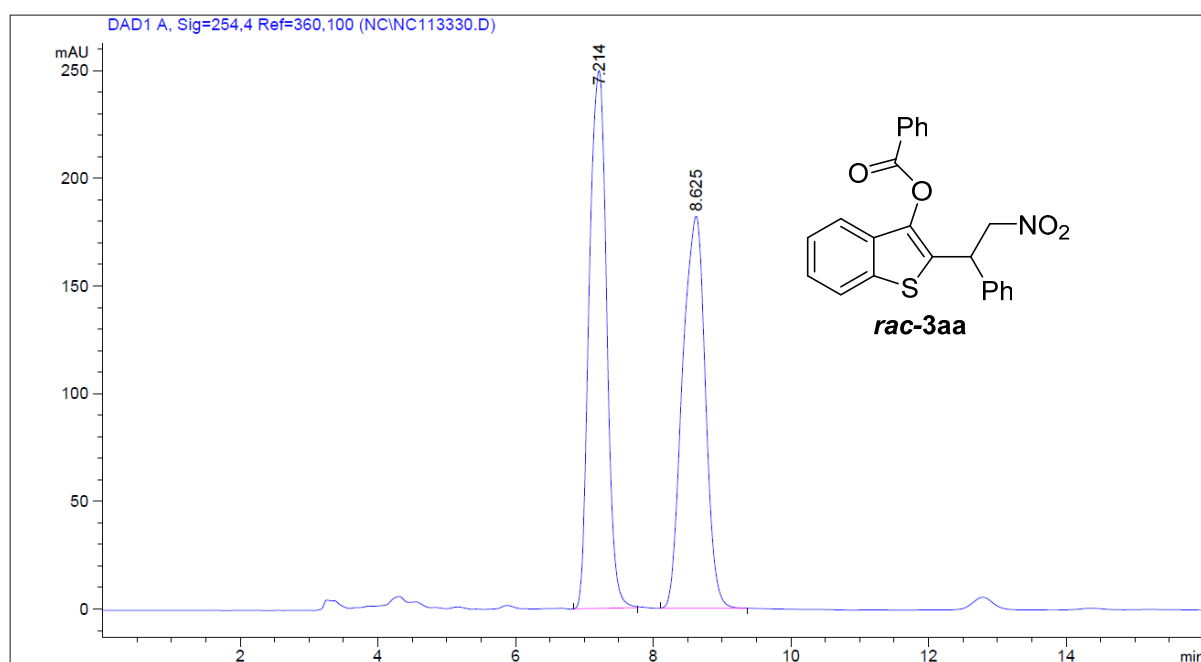

| Peak # | RetTime [min] | Type | Width [min] | Area [mAU*s] | Height [mAU] | Area %  |
|--------|---------------|------|-------------|--------------|--------------|---------|
| 1      | 7.214         | BB   | 0.2860      | 4367.04932   | 249.77336    | 51.0444 |
| 2      | 8.625         | BB   | 0.3785      | 4188.34473   | 182.00984    | 48.9556 |

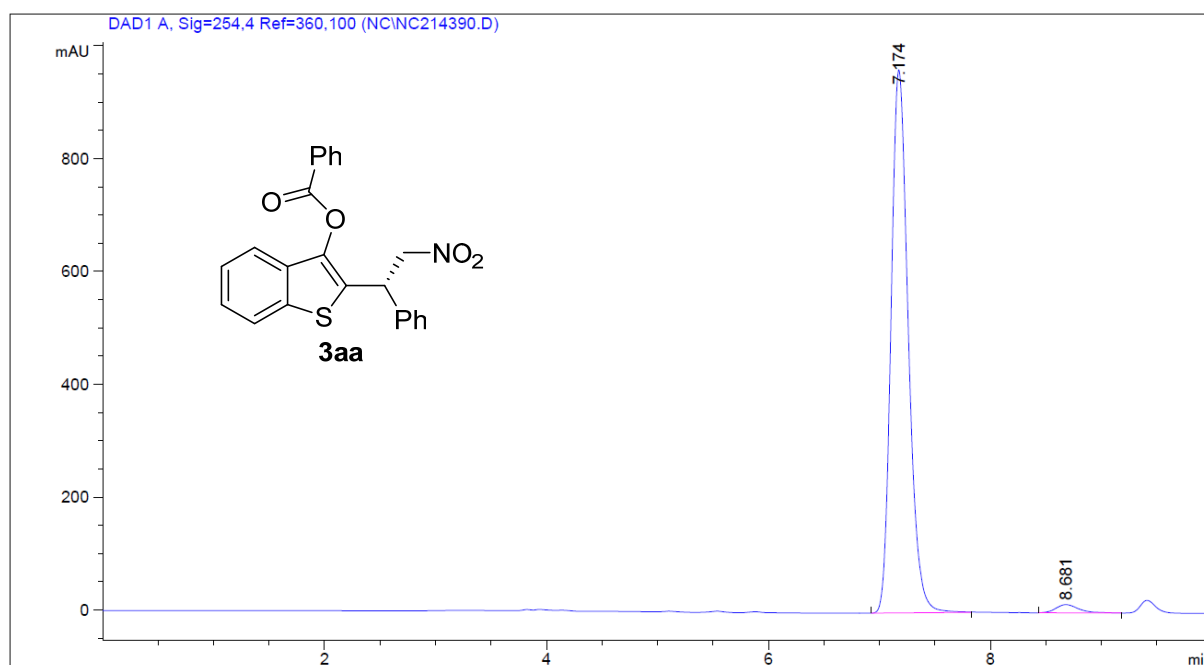

| Peak # | RetTime [min] | Type | Width [min] | Area [mAU*s] | Height [mAU] | Area %  |
|--------|---------------|------|-------------|--------------|--------------|---------|
| 1      | 7.174         | BB   | 0.1654      | 1.03468e4    | 962.86420    | 98.0134 |
| 2      | 8.681         | BB   | 0.2181      | 209.71652    | 14.55237     | 1.9866  |

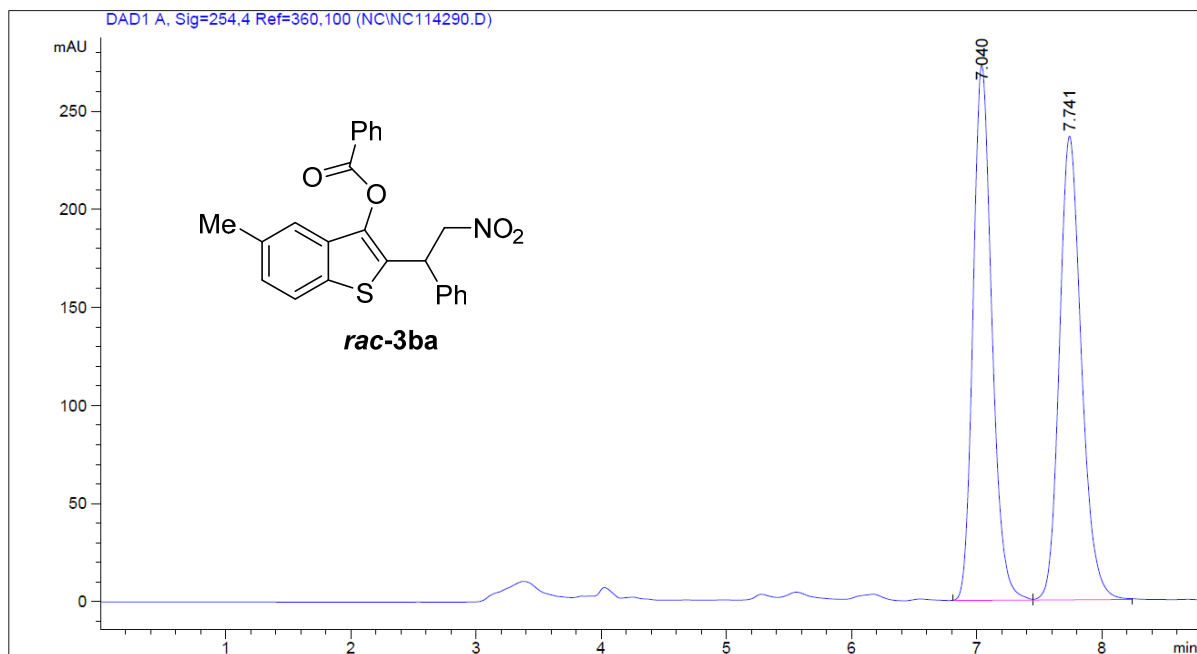

| Peak # | RetTime [min] | Type | Width [min] | Area [mAU*s] | Height [mAU] | Area %  |
|--------|---------------|------|-------------|--------------|--------------|---------|
| 1      | 7.040         | BV   | 0.1597      | 2848.92212   | 273.09830    | 49.6155 |
| 2      | 7.741         | VB   | 0.1867      | 2893.08374   | 236.46387    | 50.3845 |

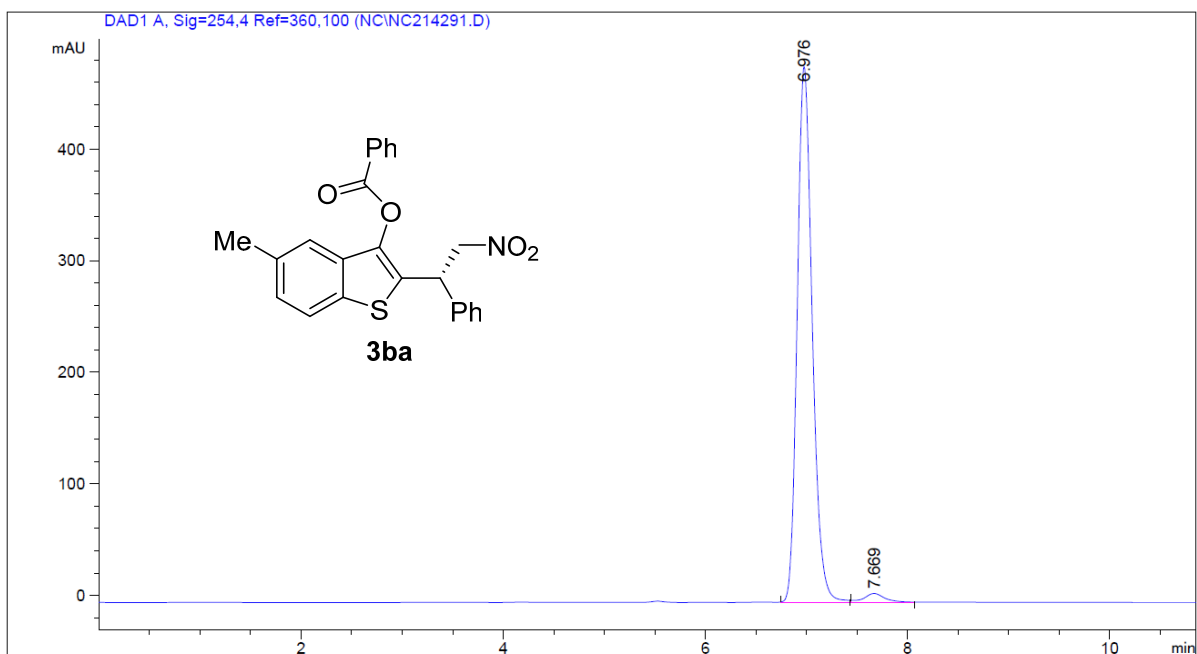

| Peak # | RetTime [min] | Type | Width [min] | Area [mAU*s] | Height [mAU] | Area %  |
|--------|---------------|------|-------------|--------------|--------------|---------|
| 1      | 6.976         | BB   | 0.1584      | 4955.16650   | 480.35056    | 97.8154 |
| 2      | 7.669         | BB   | 0.2053      | 110.66930    | 7.81213      | 2.1846  |

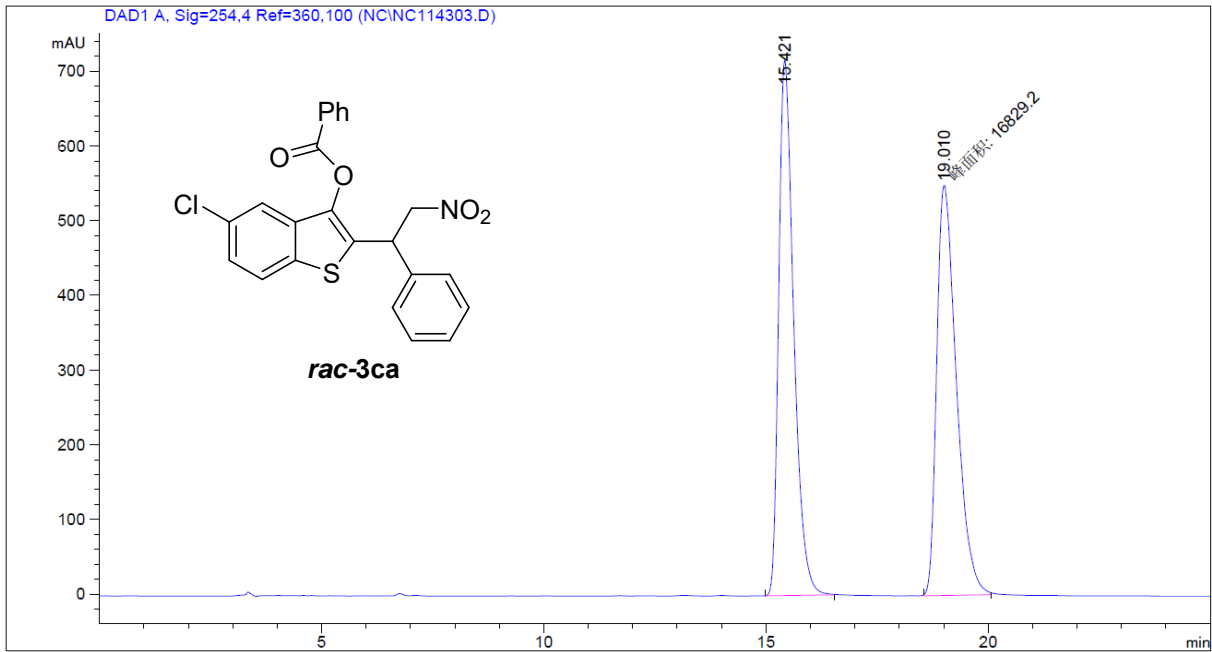

| Peak # | RetTime [min] | Type | Width [min] | Area [mAU*s] | Height [mAU] | Area %  |
|--------|---------------|------|-------------|--------------|--------------|---------|
| 1      | 15.421        | BB   | 0.3580      | 1.68209e4    | 716.27917    | 49.9876 |
| 2      | 19.010        | MM   | 0.5108      | 1.68292e4    | 549.06543    | 50.0124 |

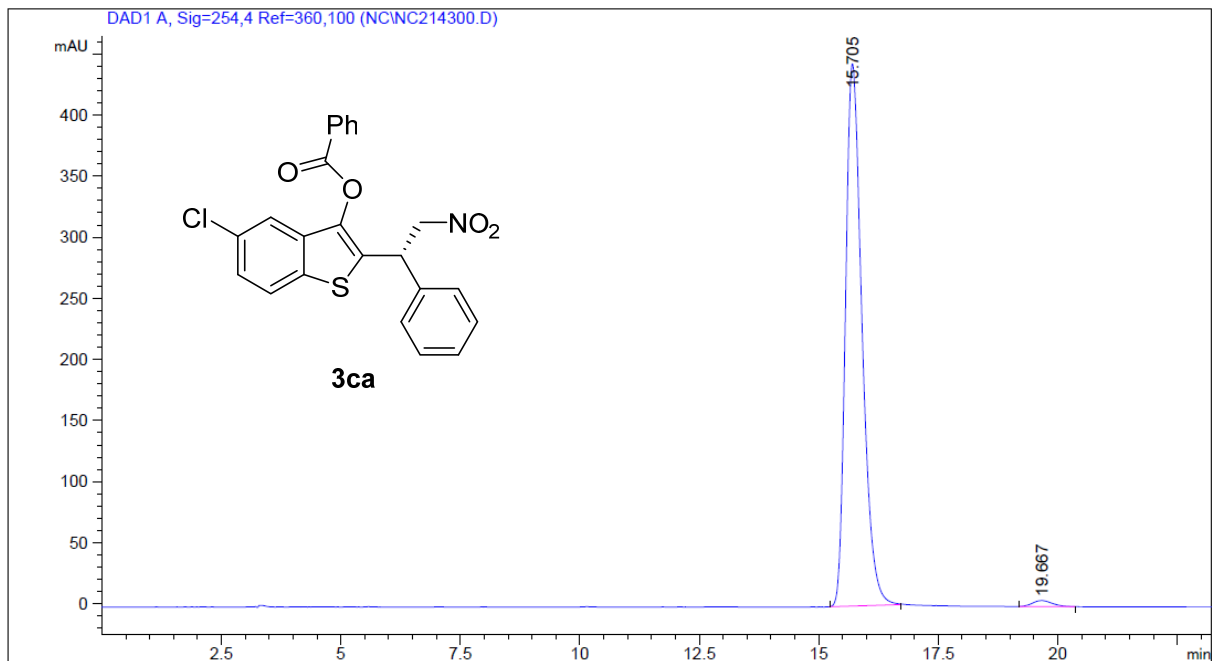

| Peak # | RetTime [min] | Type | Width [min] | Area [mAU*s] | Height [mAU] | Area %  |
|--------|---------------|------|-------------|--------------|--------------|---------|
| 1      | 15.705        | BB   | 0.3675      | 1.06305e4    | 443.65585    | 98.6974 |
| 2      | 19.667        | BB   | 0.4176      | 140.29895    | 4.93617      | 1.3026  |

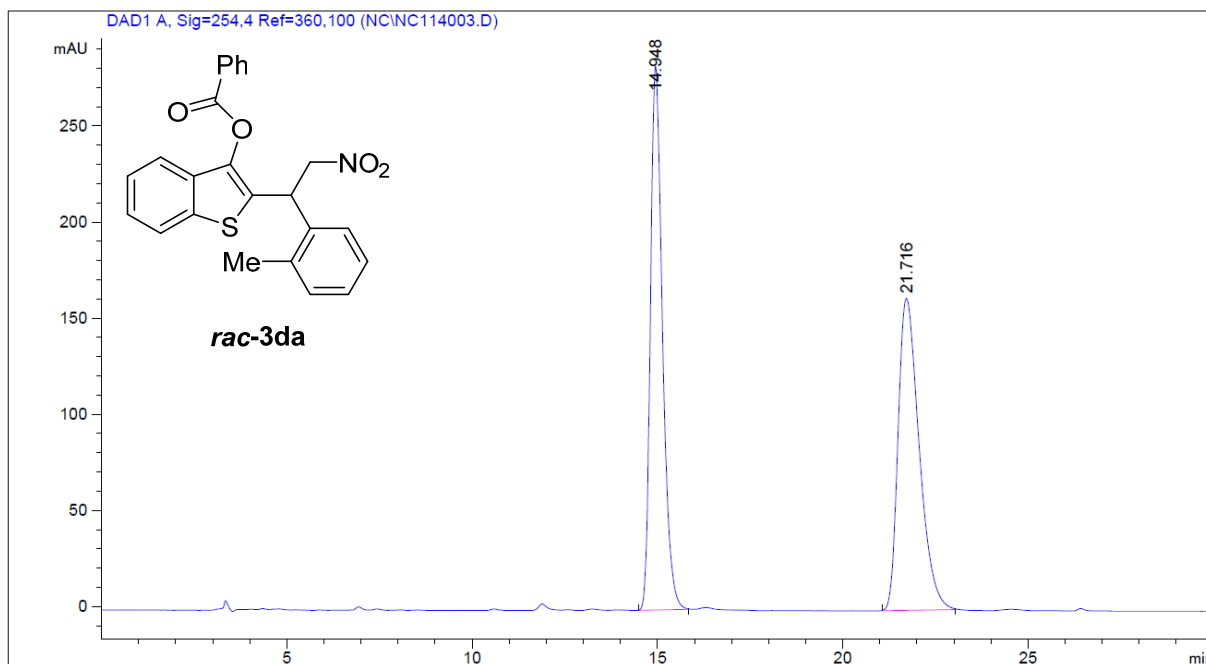

| Peak # | RetTime [min] | Type | Width [min] | Area [mAU*s] | Height [mAU] | Area %  |
|--------|---------------|------|-------------|--------------|--------------|---------|
| 1      | 14.948        | BB   | 0.3456      | 6391.13818   | 282.87219    | 50.0238 |
| 2      | 21.716        | BB   | 0.6067      | 6385.06689   | 162.39990    | 49.9762 |

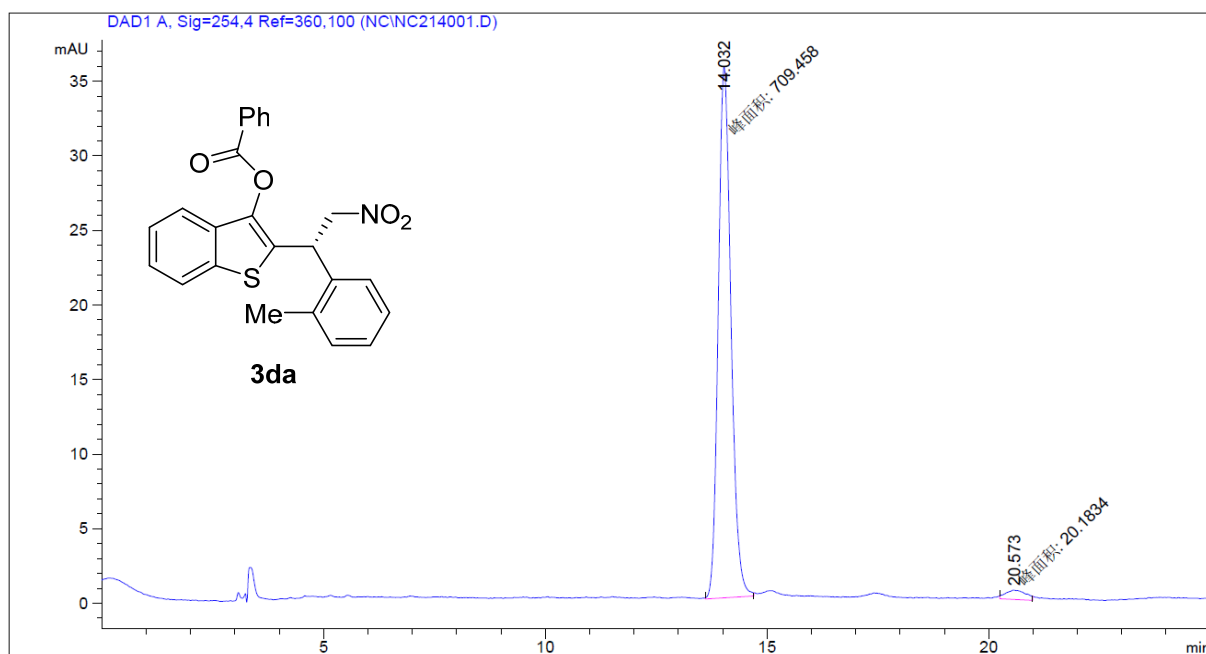

| Peak # | RetTime [min] | Type | Width [min] | Area [mAU*s] | Height [mAU] | Area %  |
|--------|---------------|------|-------------|--------------|--------------|---------|
| 1      | 14.032        | MM   | 0.3322      | 709.45825    | 35.59032     | 97.2338 |
| 2      | 20.573        | MM   | 0.5379      | 20.18344     | 6.25347e-1   | 2.7662  |

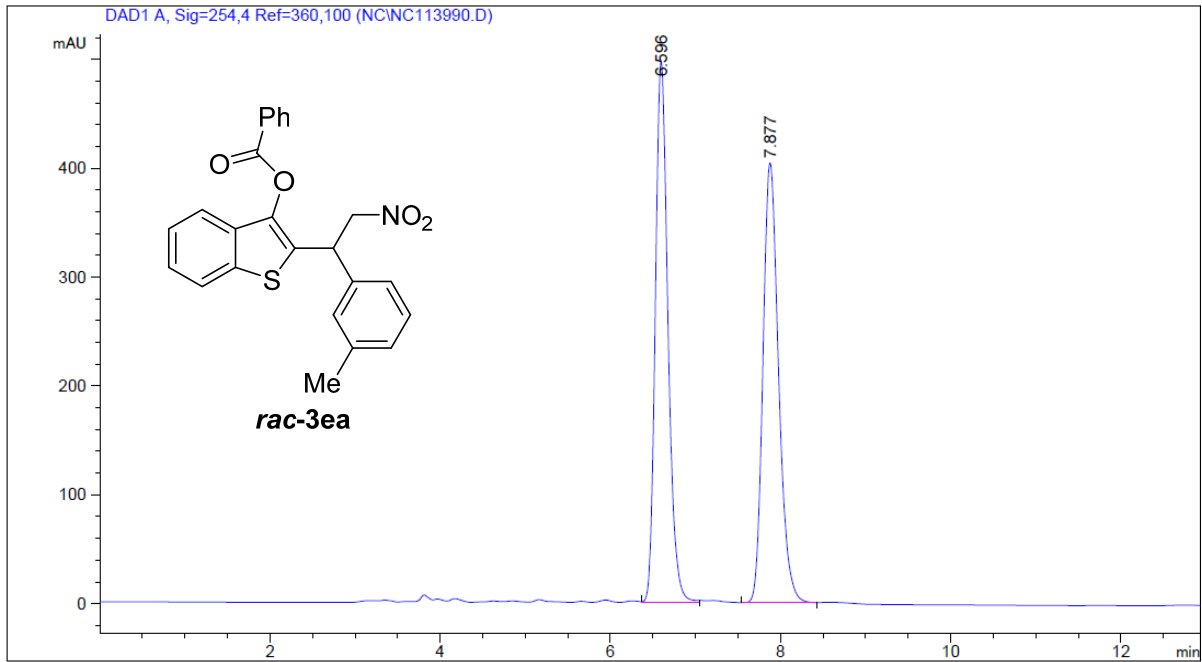

| Peak # | RetTime [min] | Type | Width [min] | Area [mAU*s] | Height [mAU] | Area %  |
|--------|---------------|------|-------------|--------------|--------------|---------|
| 1      | 6.596         | VB   | 0.1601      | 5123.11719   | 497.59024    | 49.9048 |
| 2      | 7.877         | VB   | 0.1964      | 5142.66650   | 404.24677    | 50.0952 |

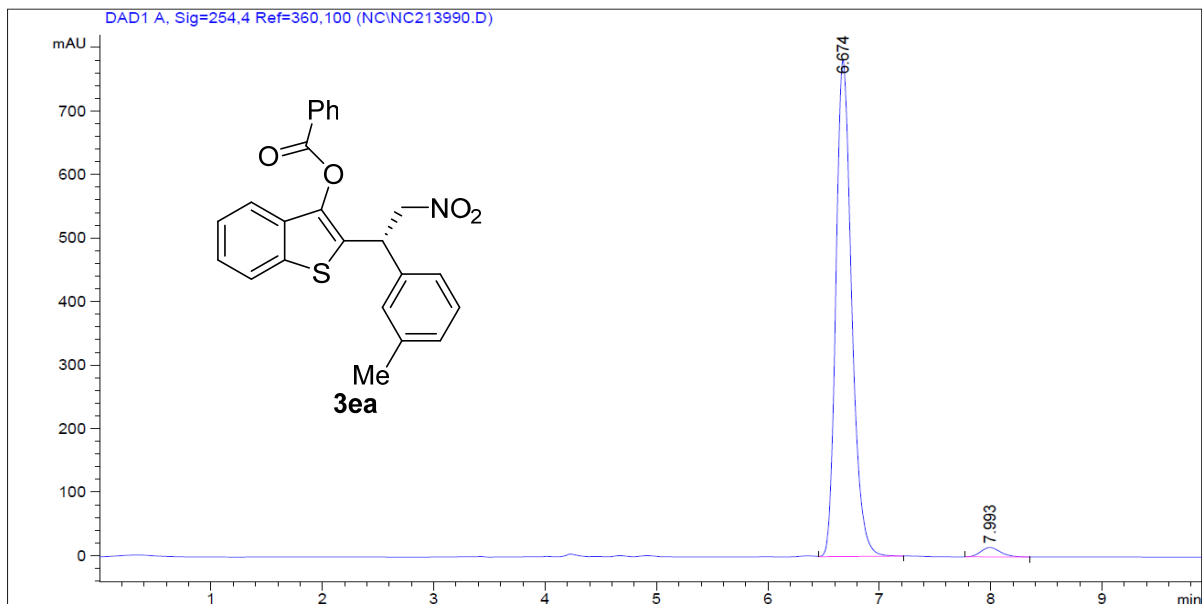

| Peak # | RetTime [min] | Type | Width [min] | Area [mAU*s] | Height [mAU] | Area %  |
|--------|---------------|------|-------------|--------------|--------------|---------|
| 1      | 6.674         | VB   | 0.1506      | 7681.10156   | 782.06195    | 97.6904 |
| 2      | 7.993         | BB   | 0.1883      | 181.60081    | 14.88413     | 2.3096  |

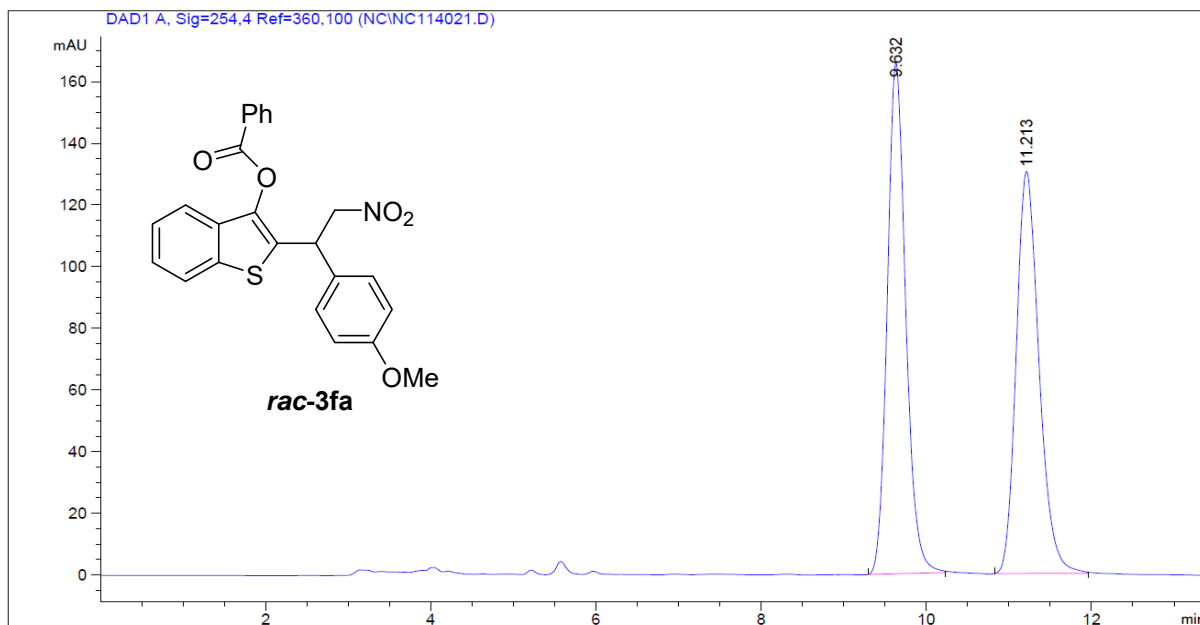

| Peak # | RetTime [min] | Type | Width [min] | Area [mAU*s] | Height [mAU] | Area %  |
|--------|---------------|------|-------------|--------------|--------------|---------|
| 1      | 9.632         | BB   | 0.2368      | 2569.92822   | 165.79570    | 50.6702 |
| 2      | 11.213        | BB   | 0.2939      | 2501.94385   | 130.37758    | 49.3298 |

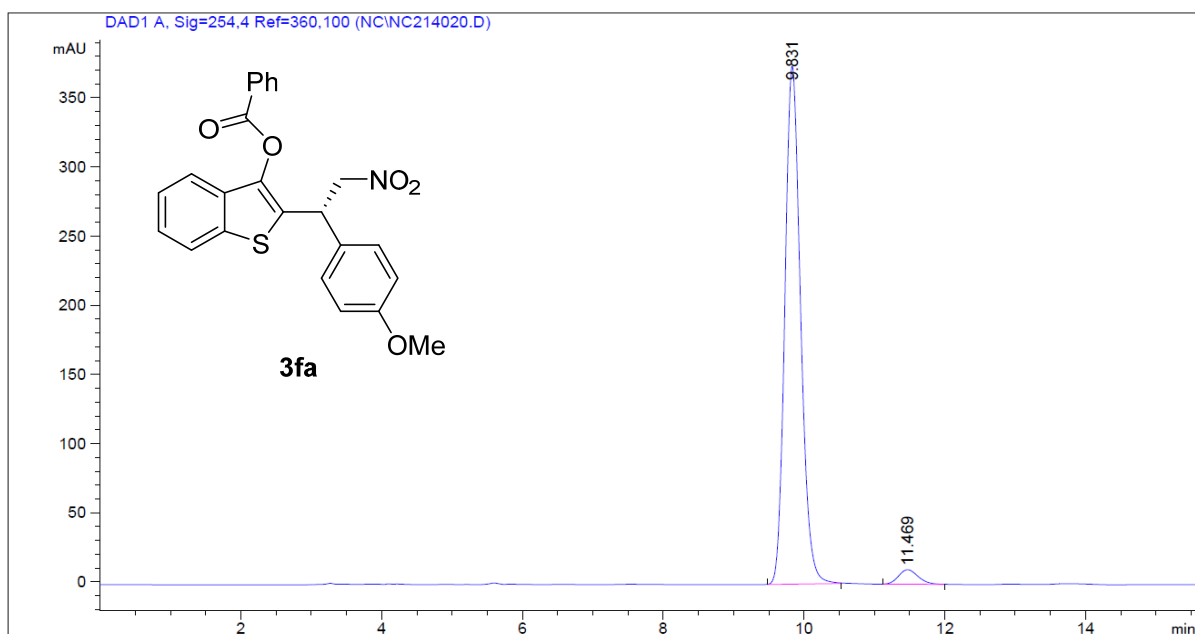

| Peak # | RetTime [min] | Type | Width [min] | Area [mAU*s] | Height [mAU] | Area %  |
|--------|---------------|------|-------------|--------------|--------------|---------|
| 1      | 9.831         | BB   | 0.2382      | 5785.66406   | 374.49673    | 96.6033 |
| 2      | 11.469        | BB   | 0.2981      | 203.43109    | 10.49881     | 3.3967  |

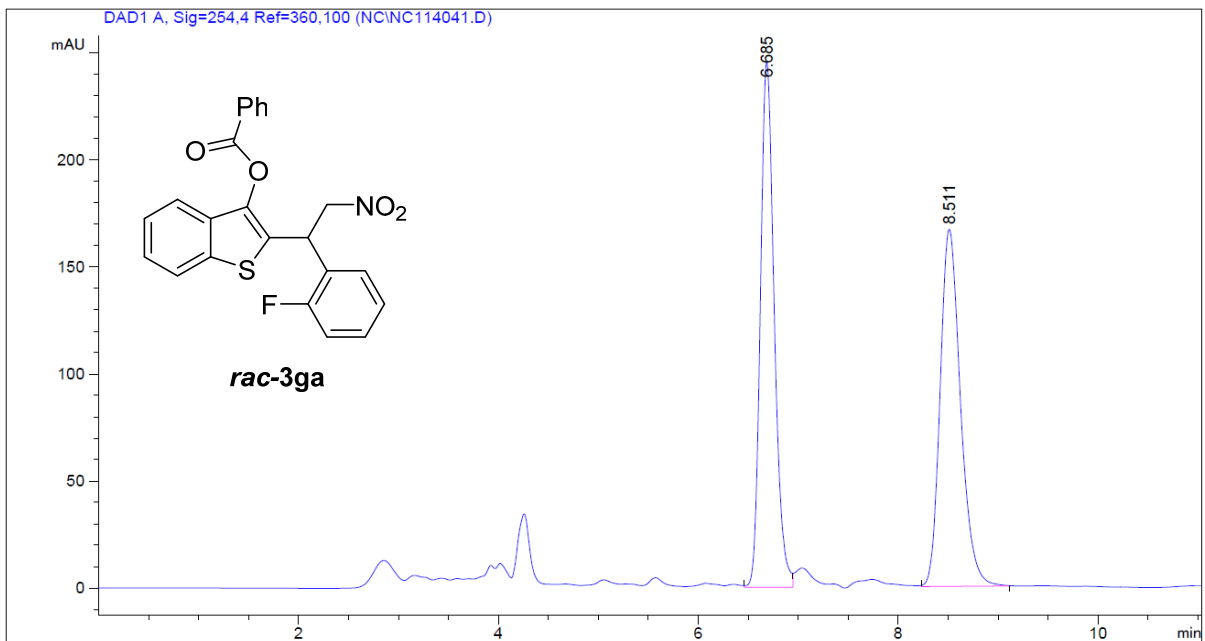

| Peak # | RetTime [min] | Type | Width [min] | Area [mAU*s] | Height [mAU] | Area %  |
|--------|---------------|------|-------------|--------------|--------------|---------|
| 1      | 6.685         | VV   | 0.1485      | 2368.26709   | 245.65640    | 50.0822 |
| 2      | 8.511         | BB   | 0.2169      | 2360.49341   | 166.97946    | 49.9178 |

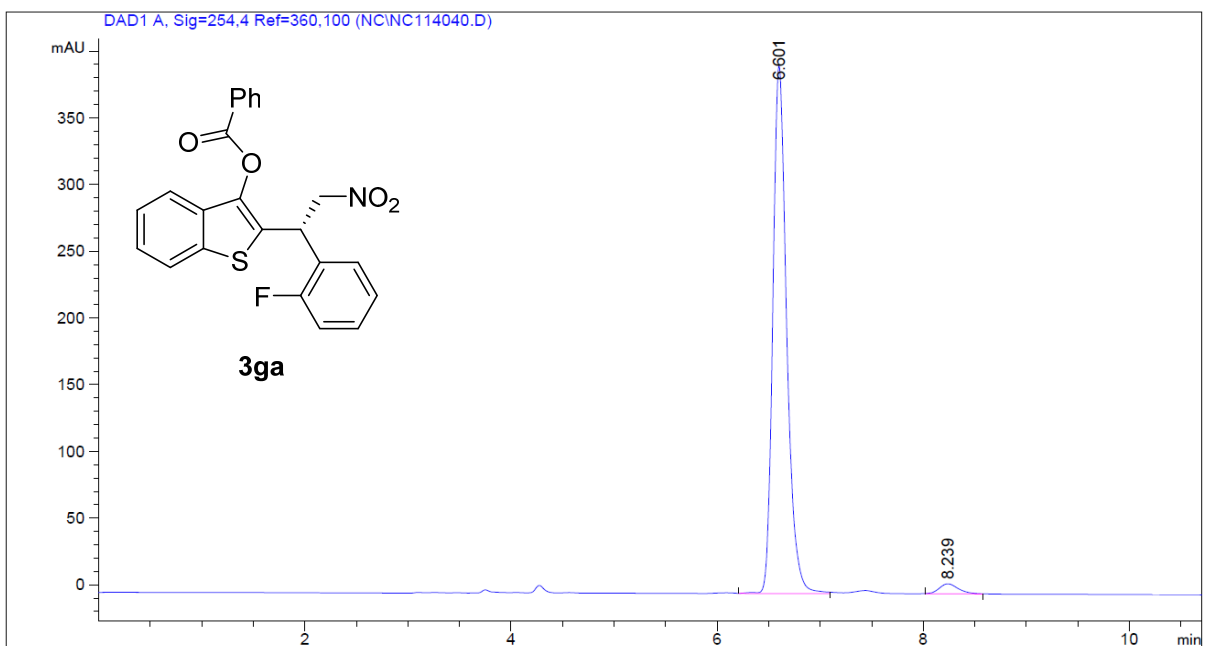

| Peak # | RetTime [min] | Type | Width [min] | Area [mAU*s] | Height [mAU] | Area %  |
|--------|---------------|------|-------------|--------------|--------------|---------|
| 1      | 6.601         | VB   | 0.1427      | 3688.06616   | 395.81784    | 97.4121 |
| 2      | 8.239         | BB   | 0.1978      | 97.97725     | 7.53078      | 2.5879  |

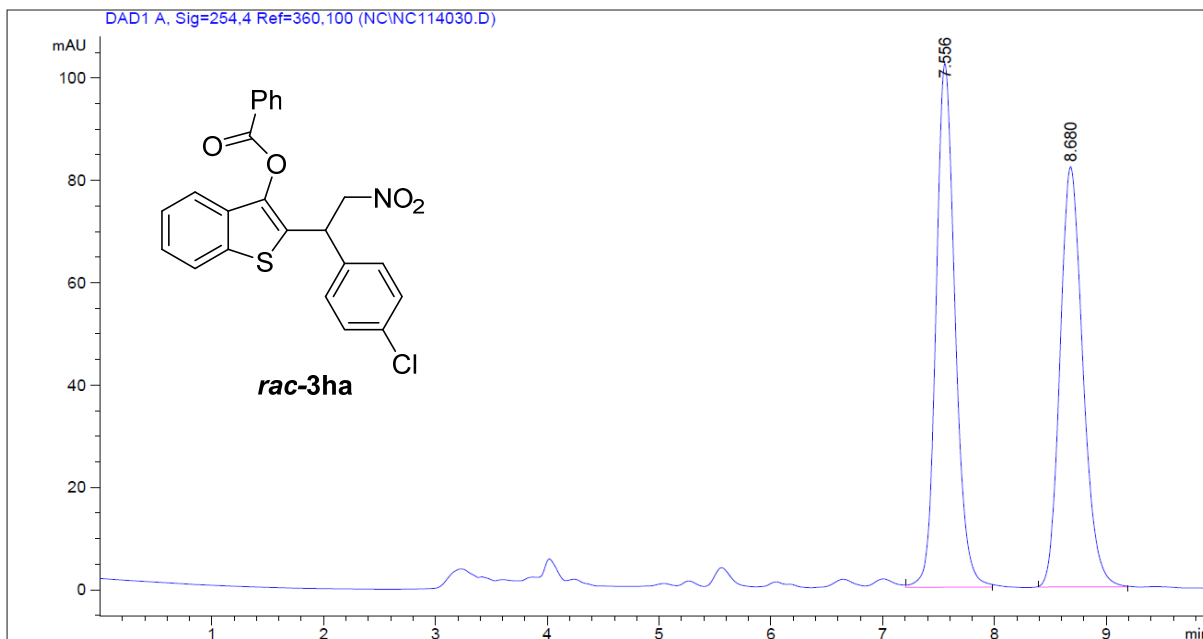

| Peak # | RetTime [min] | Type | Width [min] | Area [mAU*s] | Height [mAU] | Area %  |
|--------|---------------|------|-------------|--------------|--------------|---------|
| 1      | 7.556         | VB   | 0.1803      | 1213.95190   | 102.38133    | 50.9580 |
| 2      | 8.680         | BB   | 0.2180      | 1168.30591   | 82.11063     | 49.0420 |

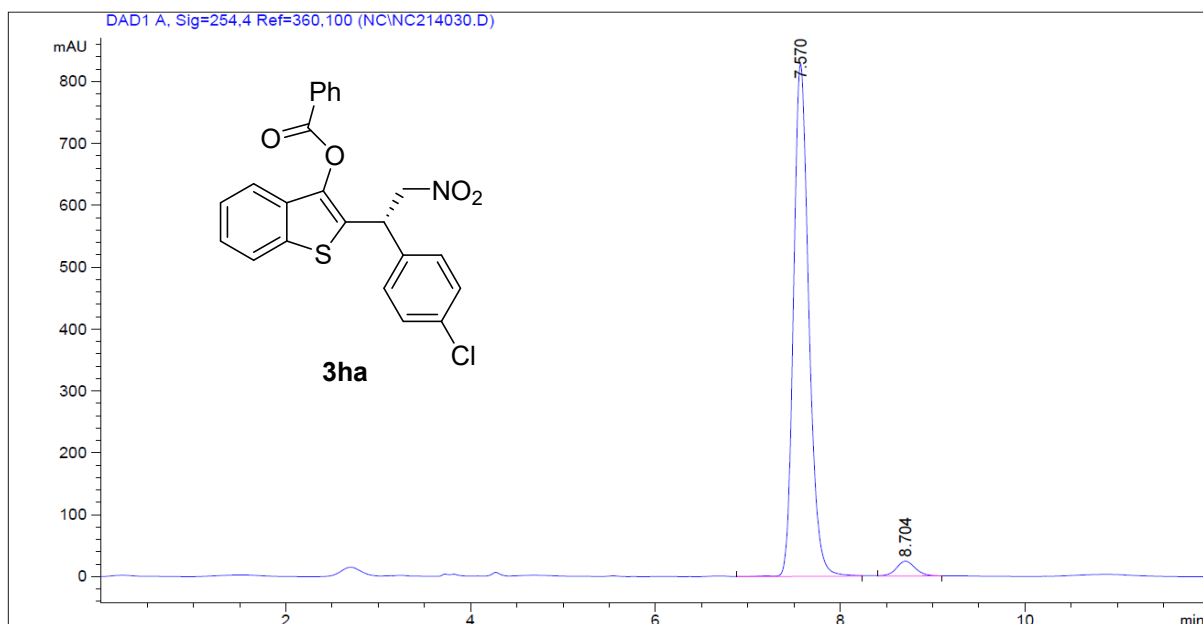

| Peak # | RetTime [min] | Type | Width [min] | Area [mAU*s] | Height [mAU] | Area %  |
|--------|---------------|------|-------------|--------------|--------------|---------|
| 1      | 7.570         | VB   | 0.1760      | 9517.87793   | 828.49286    | 96.4911 |
| 2      | 8.704         | BB   | 0.2200      | 346.11508    | 24.03698     | 3.5089  |



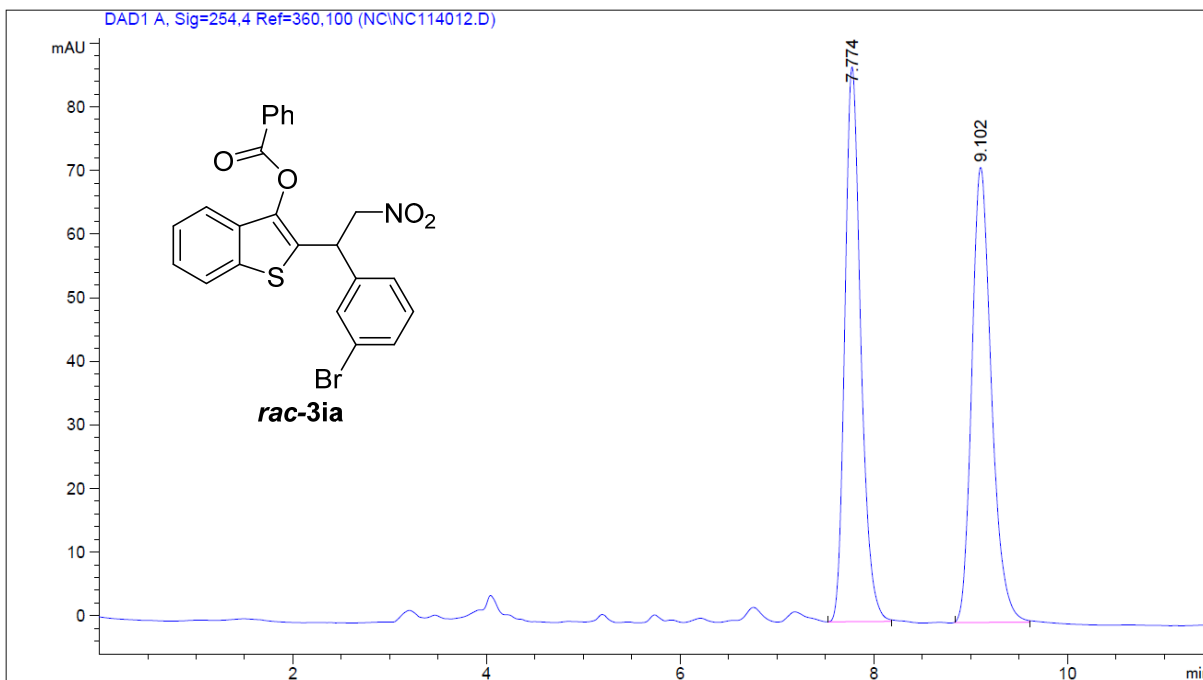

| Peak # | RetTime [min] | Type | Width [min] | Area [mAU*s] | Height [mAU] | Area %  |
|--------|---------------|------|-------------|--------------|--------------|---------|
| 1      | 7.774         | VB   | 0.1733      | 997.03558    | 87.24976     | 49.6544 |
| 2      | 9.102         | BB   | 0.2148      | 1010.91632   | 71.56730     | 50.3456 |

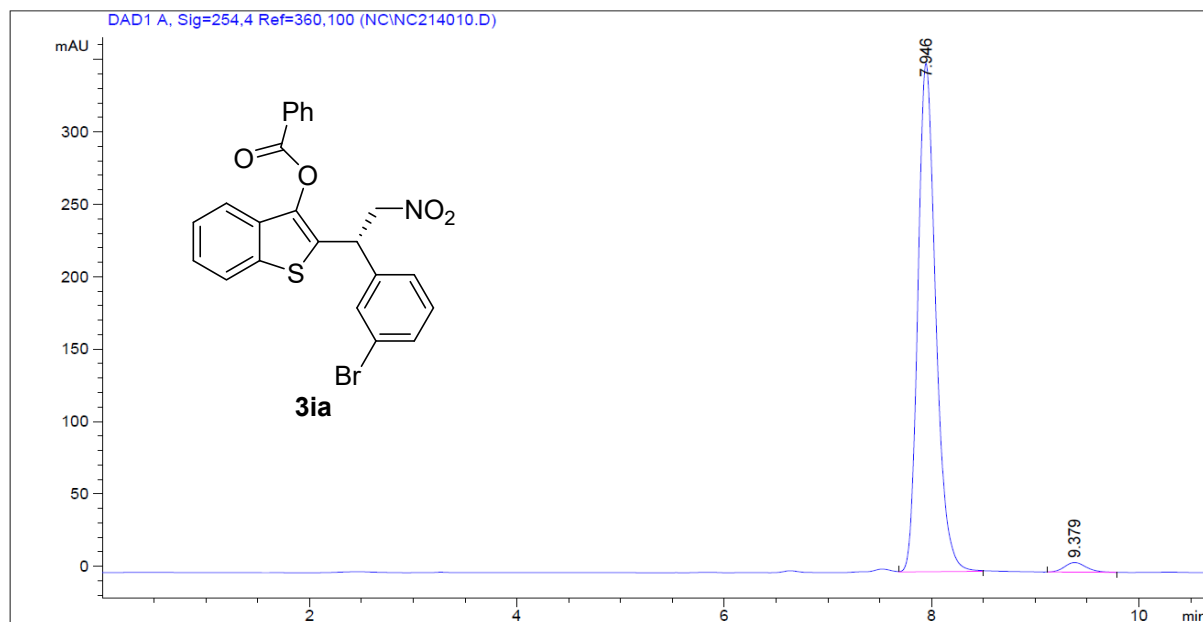

| Peak # | RetTime [min] | Type | Width [min] | Area [mAU*s] | Height [mAU] | Area %  |
|--------|---------------|------|-------------|--------------|--------------|---------|
| 1      | 7.946         | VB   | 0.1814      | 4196.32666   | 351.23386    | 97.7510 |
| 2      | 9.379         | BB   | 0.2257      | 96.54776     | 6.63807      | 2.2490  |

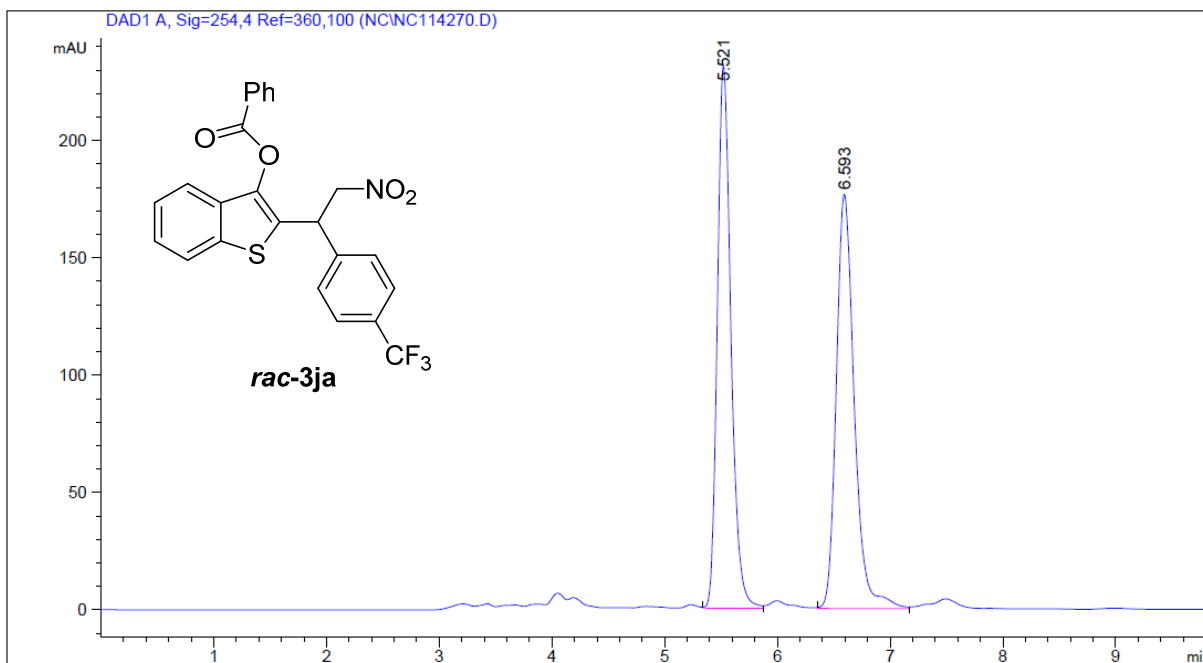

| Peak # | RetTime [min] | Type | Width [min] | Area [mAU*s] | Height [mAU] | Area %  |
|--------|---------------|------|-------------|--------------|--------------|---------|
| 1      | 5.521         | VV   | 0.1276      | 1933.99011   | 231.15701    | 49.7180 |
| 2      | 6.593         | BB   | 0.1692      | 1955.93030   | 176.57790    | 50.2820 |

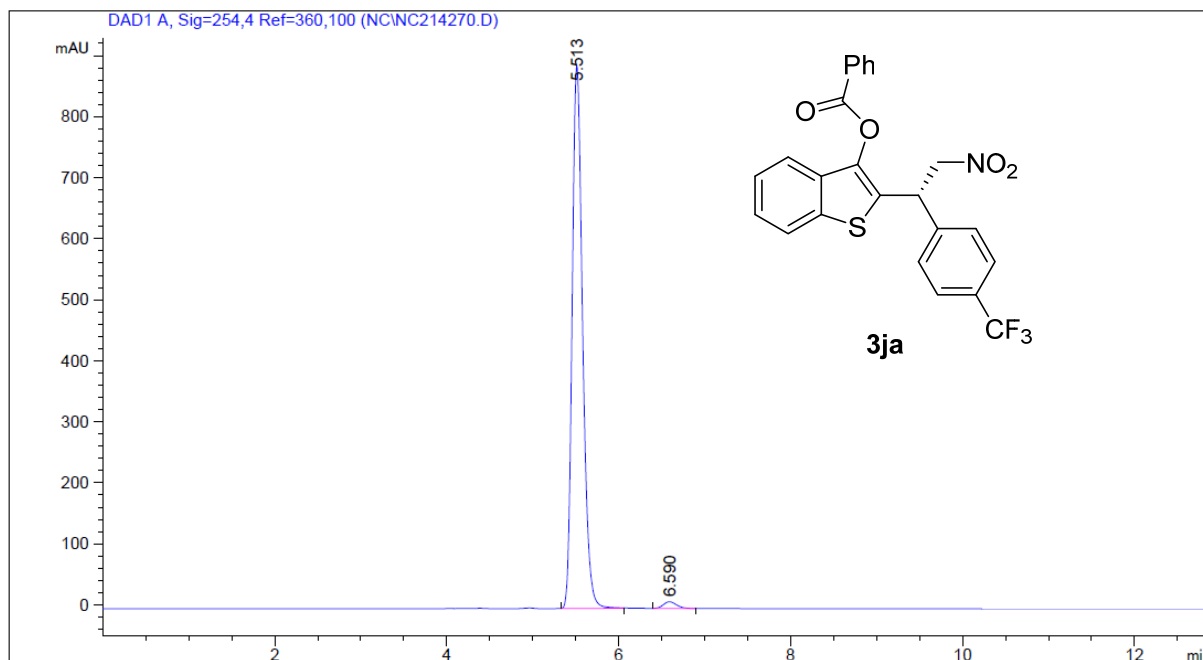

| Peak # | RetTime [min] | Type | Width [min] | Area [mAU*s] | Height [mAU] | Area %  |
|--------|---------------|------|-------------|--------------|--------------|---------|
| 1      | 5.513         | BB   | 0.1306      | 7520.27344   | 890.19879    | 98.4565 |
| 2      | 6.590         | BB   | 0.1631      | 117.89263    | 10.99617     | 1.5435  |

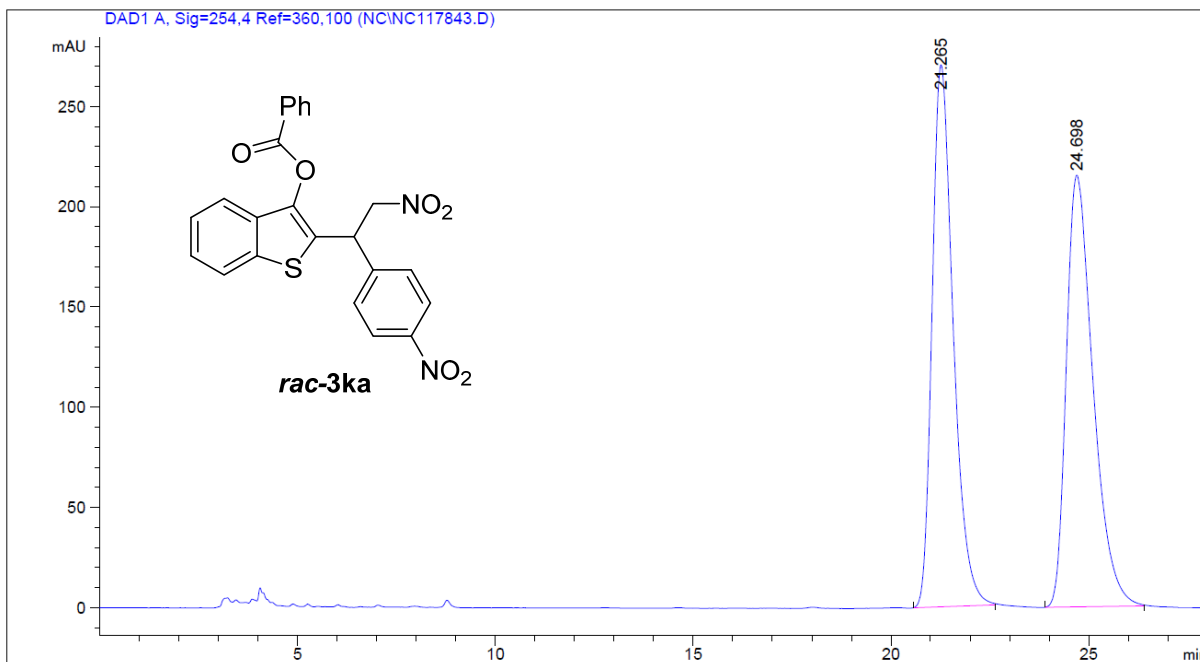

| Peak # | RetTime [min] | Type | Width [min] | Area [mAU*s] | Height [mAU] | Area %  |
|--------|---------------|------|-------------|--------------|--------------|---------|
| 1      | 21.265        | BB   | 0.5637      | 1.00019e4    | 270.31033    | 49.7862 |
| 2      | 24.698        | BB   | 0.7127      | 1.00878e4    | 215.28685    | 50.2138 |

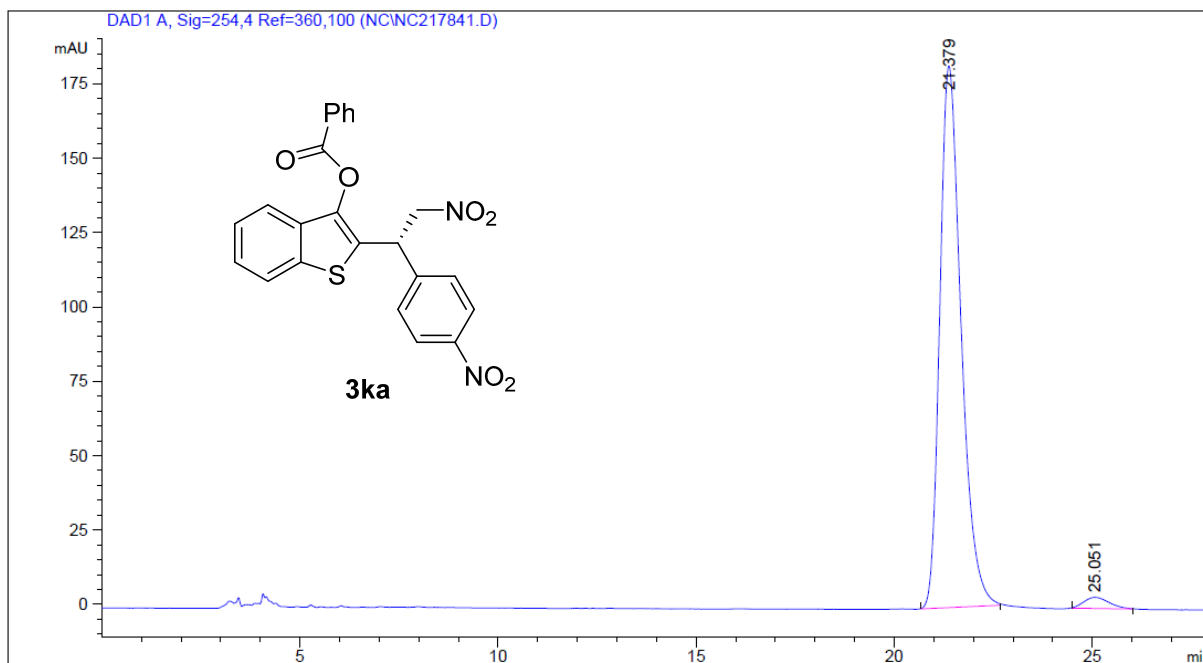

| Peak # | RetTime [min] | Type | Width [min] | Area [mAU*s] | Height [mAU] | Area %  |
|--------|---------------|------|-------------|--------------|--------------|---------|
| 1      | 21.379        | BB   | 0.5695      | 6796.57227   | 182.06740    | 97.6213 |
| 2      | 25.051        | BB   | 0.5350      | 165.61130    | 3.73715      | 2.3787  |

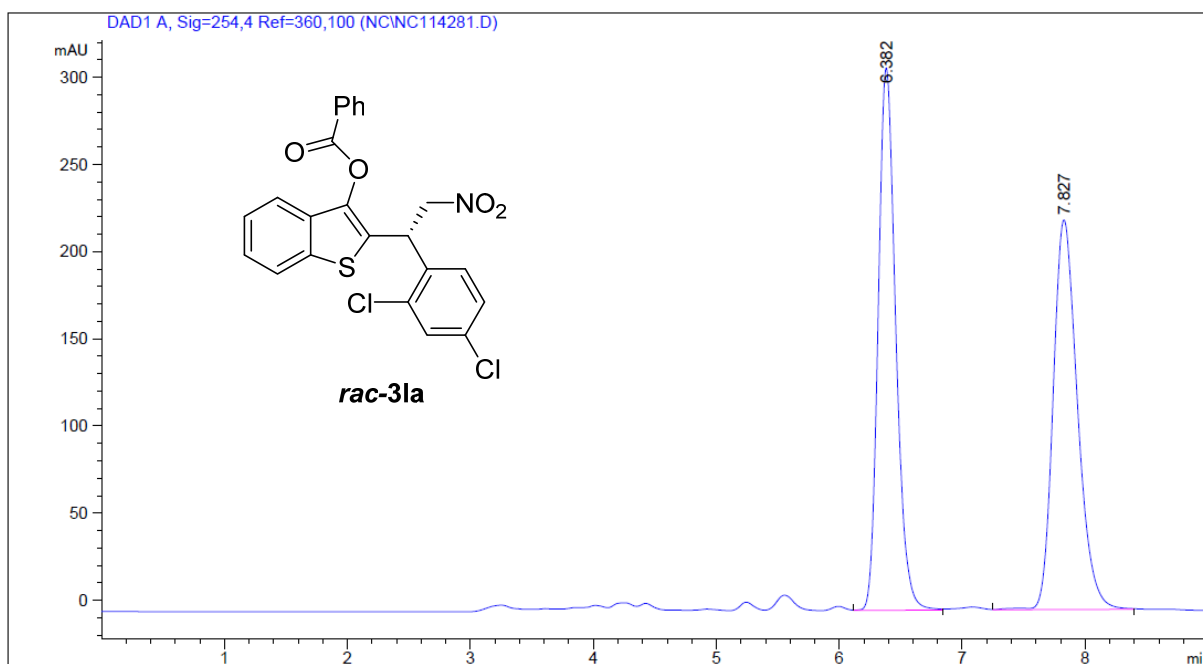

| Peak # | RetTime [min] | Type | Width [min] | Area [mAU*s] | Height [mAU] | Area %  |
|--------|---------------|------|-------------|--------------|--------------|---------|
| 1      | 6.382         | VB   | 0.1517      | 3089.39502   | 311.40234    | 50.0999 |
| 2      | 7.827         | VB   | 0.2125      | 3077.07324   | 223.62166    | 49.9001 |

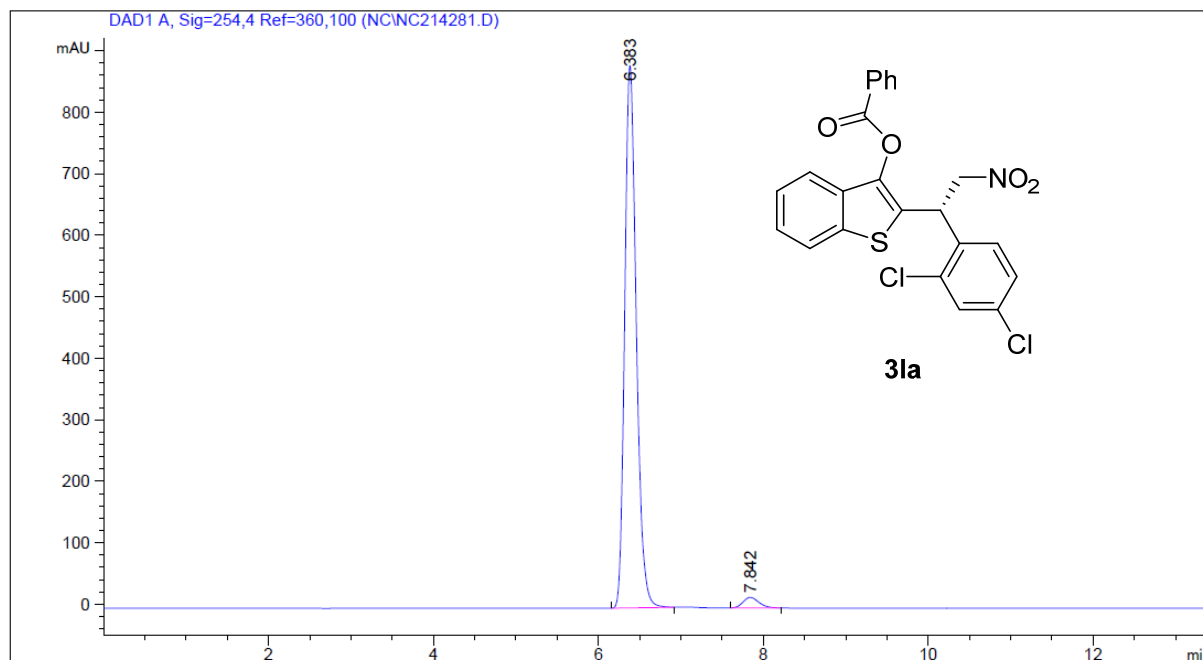

| Peak # | RetTime [min] | Type | Width [min] | Area [mAU*s] | Height [mAU] | Area %  |
|--------|---------------|------|-------------|--------------|--------------|---------|
| 1      | 6.383         | BB   | 0.1495      | 8582.33496   | 882.13019    | 97.3677 |
| 2      | 7.842         | BB   | 0.2044      | 232.02133    | 17.30632     | 2.6323  |

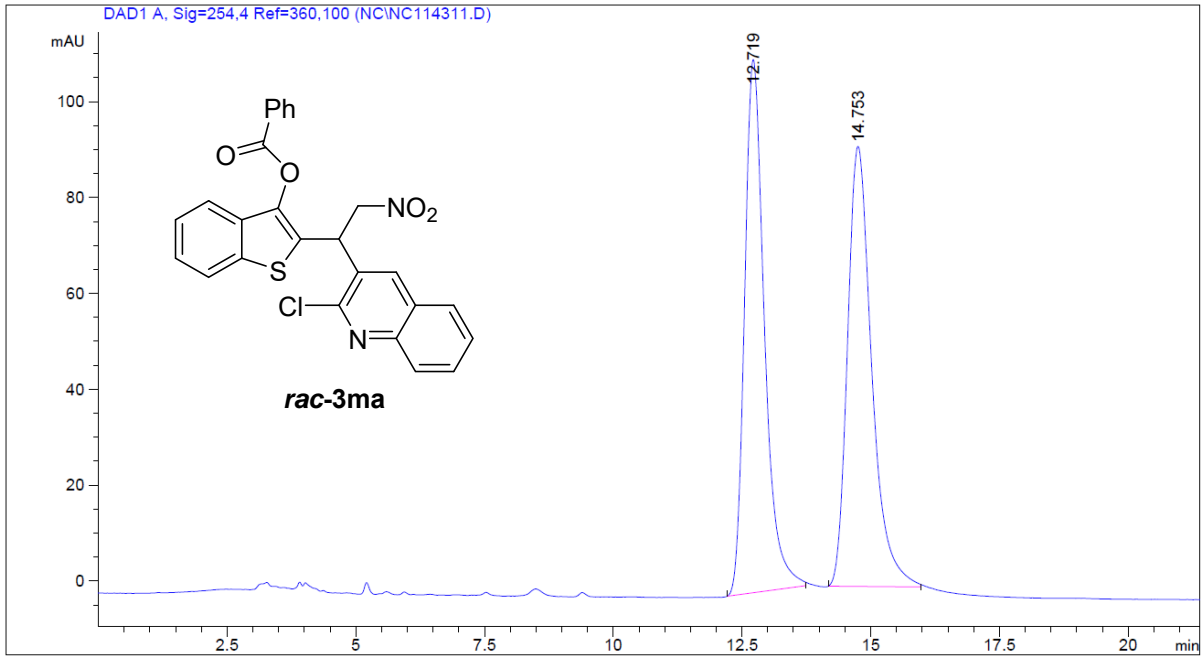

| Peak # | RetTime [min] | Type | Width [min] | Area [mAU*s] | Height [mAU] | Area %  |
|--------|---------------|------|-------------|--------------|--------------|---------|
| 1      | 12.719        | BB   | 0.4045      | 2979.63916   | 111.23364    | 49.8586 |
| 2      | 14.753        | BB   | 0.4968      | 2996.53516   | 91.80228     | 50.1414 |

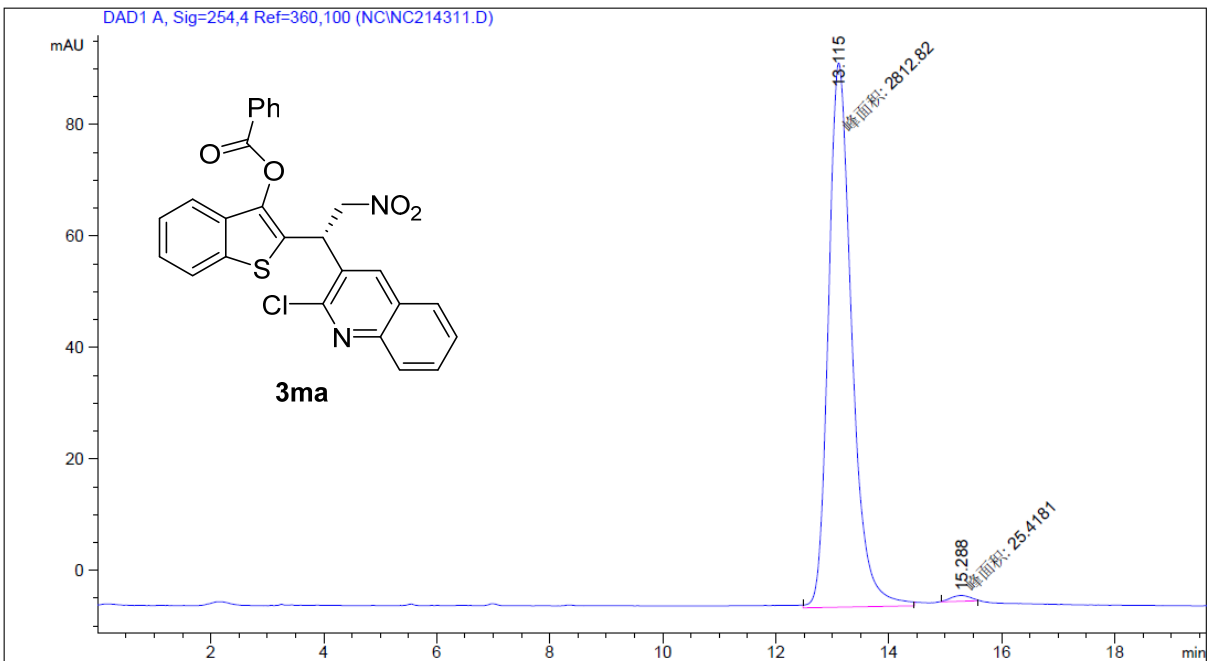

| Peak # | RetTime [min] | Type | Width [min] | Area [mAU*s] | Height [mAU] | Area %  |
|--------|---------------|------|-------------|--------------|--------------|---------|
| 1      | 13.115        | MM   | 0.4800      | 2812.82251   | 97.67286     | 99.1044 |
| 2      | 15.288        | MM   | 0.3969      | 25.41809     | 1.06735      | 0.8956  |

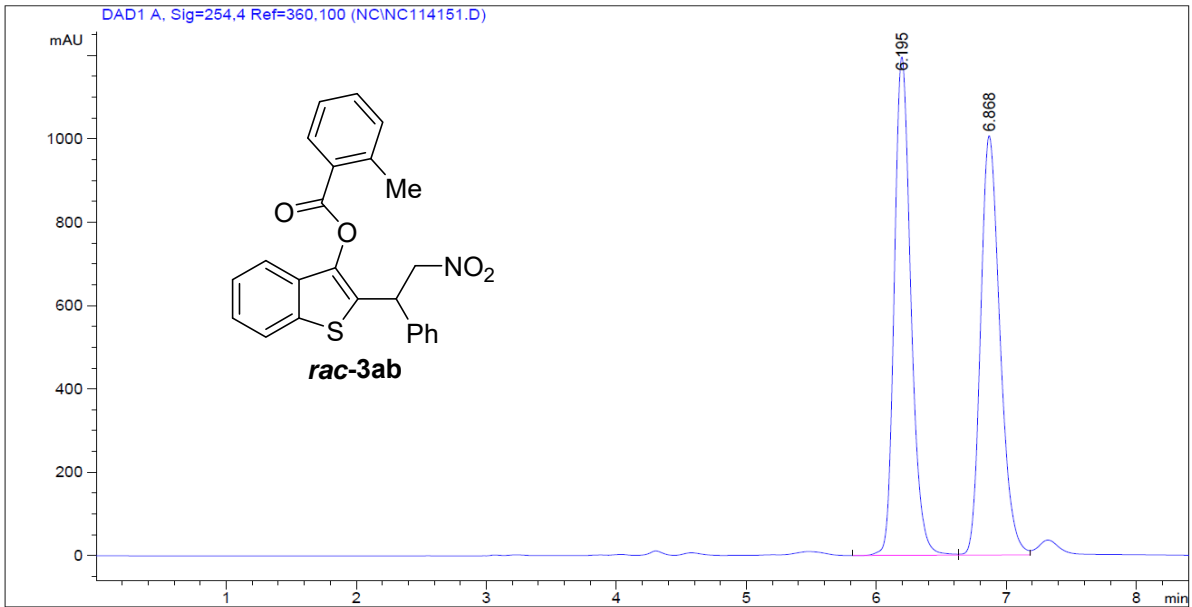

| Peak # | RetTime [min] | Type | Width [min] | Area [mAU*s] | Height [mAU] | Area %  |
|--------|---------------|------|-------------|--------------|--------------|---------|
| 1      | 6.195         | VV   | 0.1353      | 1.05991e4    | 1197.06946   | 50.4280 |
| 2      | 6.868         | VV   | 0.1607      | 1.04192e4    | 1006.82849   | 49.5720 |

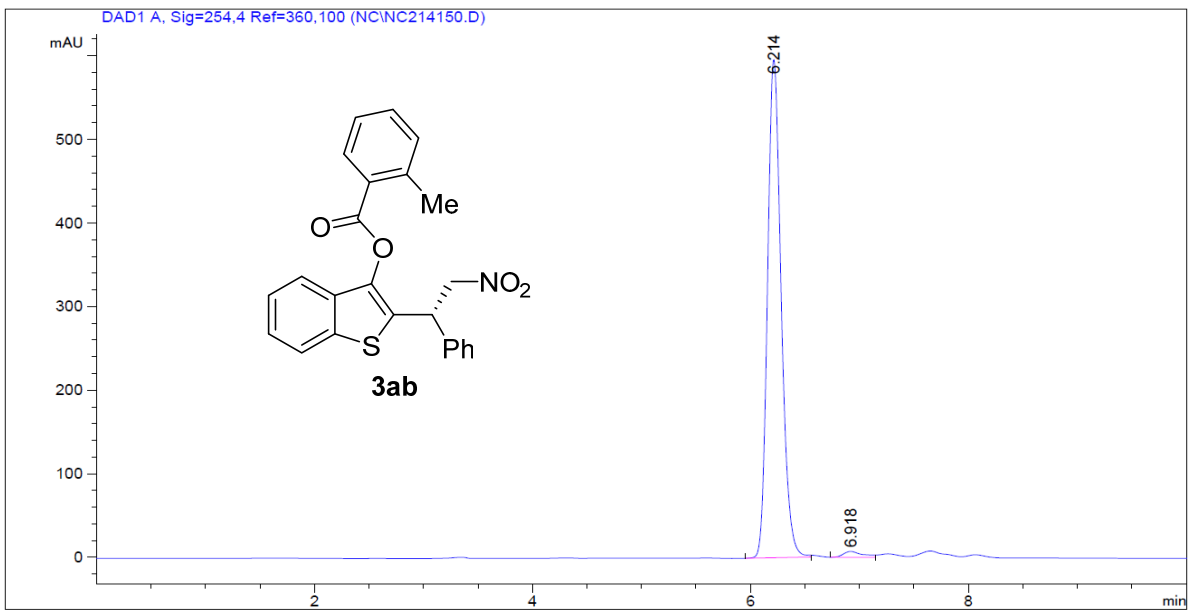

| Peak # | RetTime [min] | Type | Width [min] | Area [mAU*s] | Height [mAU] | Area %  |
|--------|---------------|------|-------------|--------------|--------------|---------|
| 1      | 6.214         | BB   | 0.1334      | 5181.00488   | 596.25702    | 98.3553 |
| 2      | 6.918         | BV   | 0.1797      | 86.63465     | 7.03153      | 1.6447  |

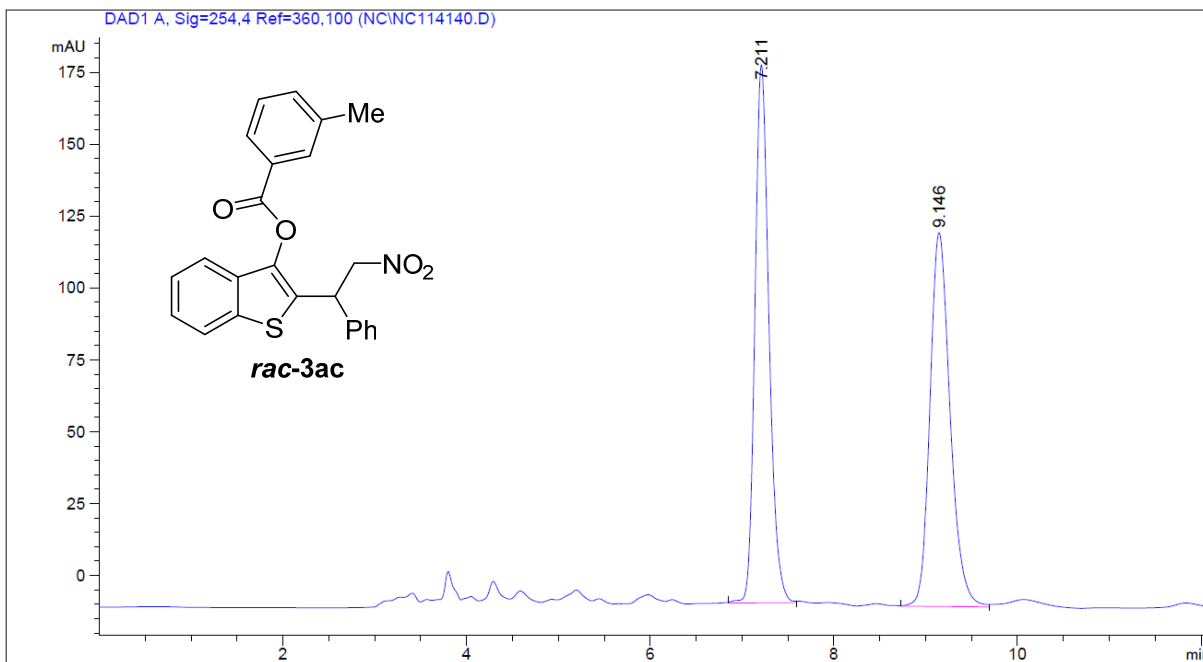

| Peak # | RetTime [min] | Type | Width [min] | Area [mAU*s] | Height [mAU] | Area %  |
|--------|---------------|------|-------------|--------------|--------------|---------|
| 1      | 7.211         | BB   | 0.1623      | 1995.43591   | 187.23297    | 50.1304 |
| 2      | 9.146         | VB   | 0.2341      | 1985.05090   | 130.04665    | 49.8696 |

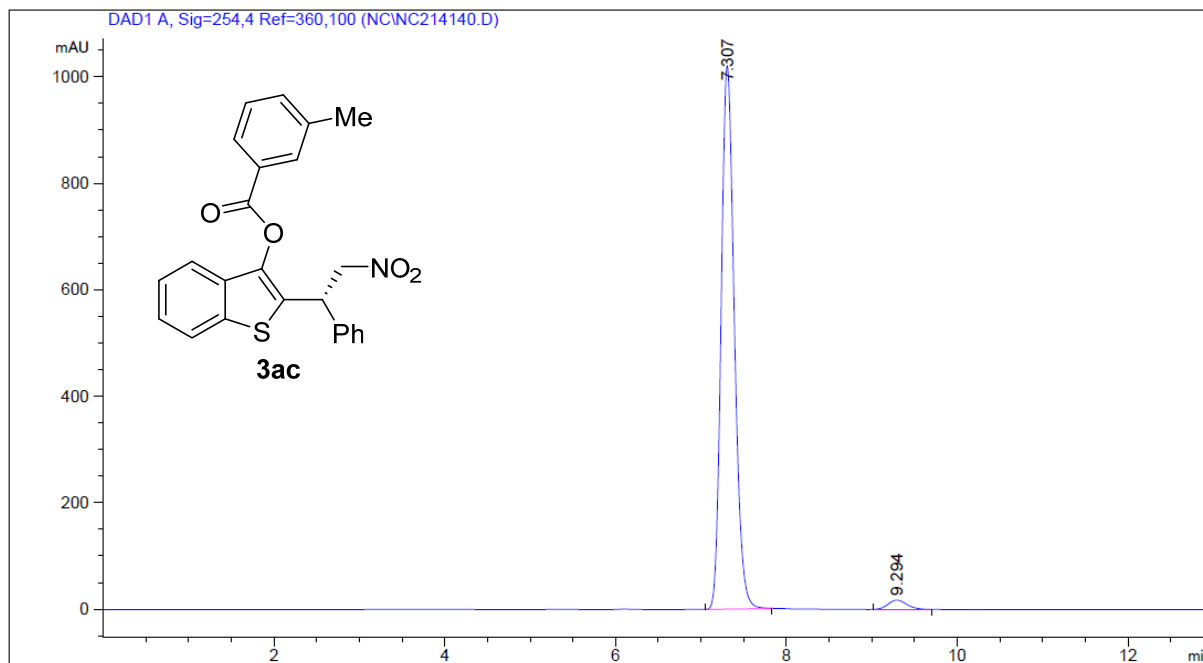

| Peak # | RetTime [min] | Type | Width [min] | Area [mAU*s] | Height [mAU] | Area %  |
|--------|---------------|------|-------------|--------------|--------------|---------|
| 1      | 7.307         | BB   | 0.1668      | 1.09246e4    | 1021.22949   | 97.6004 |
| 2      | 9.294         | BB   | 0.2346      | 268.58734    | 17.54549     | 2.3996  |

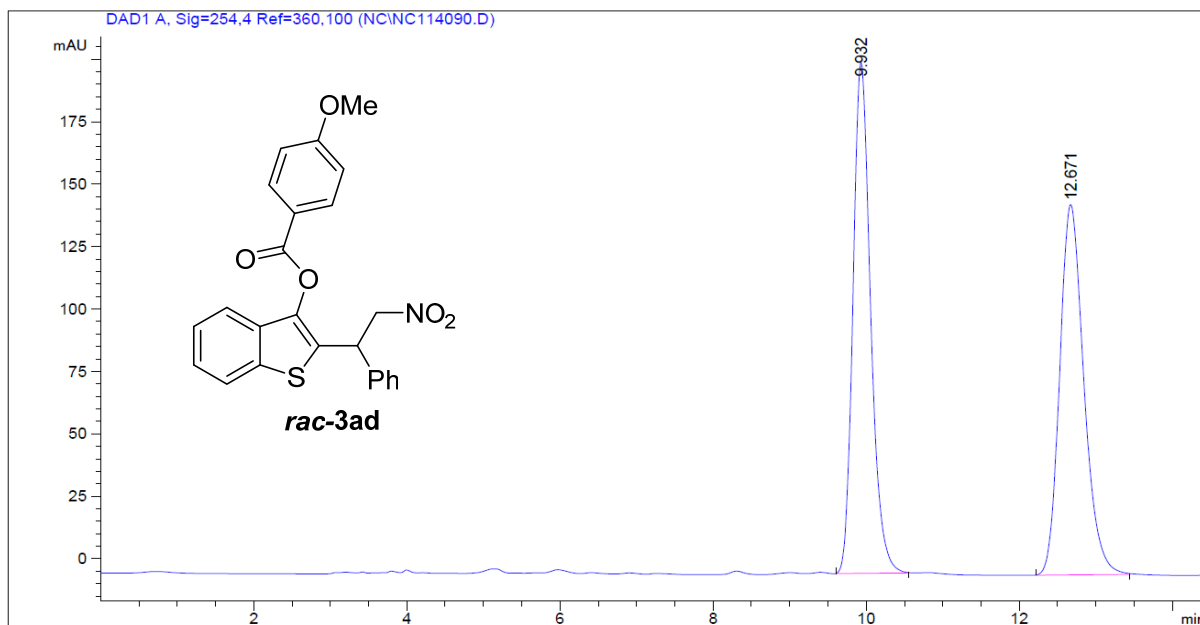

| Peak # | RetTime [min] | Type | Width [min] | Area [mAU*s] | Height [mAU] | Area %  |
|--------|---------------|------|-------------|--------------|--------------|---------|
| 1      | 9.932         | BB   | 0.2439      | 3258.43774   | 204.49390    | 50.0689 |
| 2      | 12.671        | BB   | 0.3357      | 3249.46899   | 148.27846    | 49.9311 |

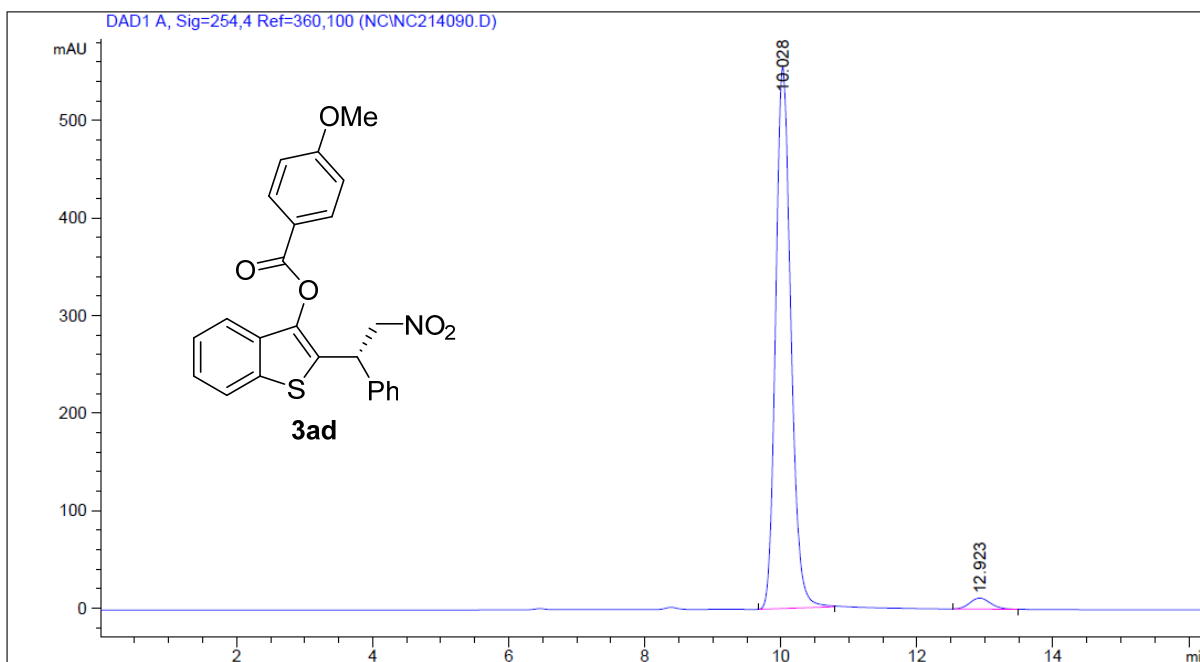

| Peak # | RetTime [min] | Type | Width [min] | Area [mAU*s] | Height [mAU] | Area %  |
|--------|---------------|------|-------------|--------------|--------------|---------|
| 1      | 10.028        | BB   | 0.2398      | 8656.08984   | 555.54346    | 97.2930 |
| 2      | 12.923        | BB   | 0.3267      | 240.83736    | 11.29877     | 2.7070  |



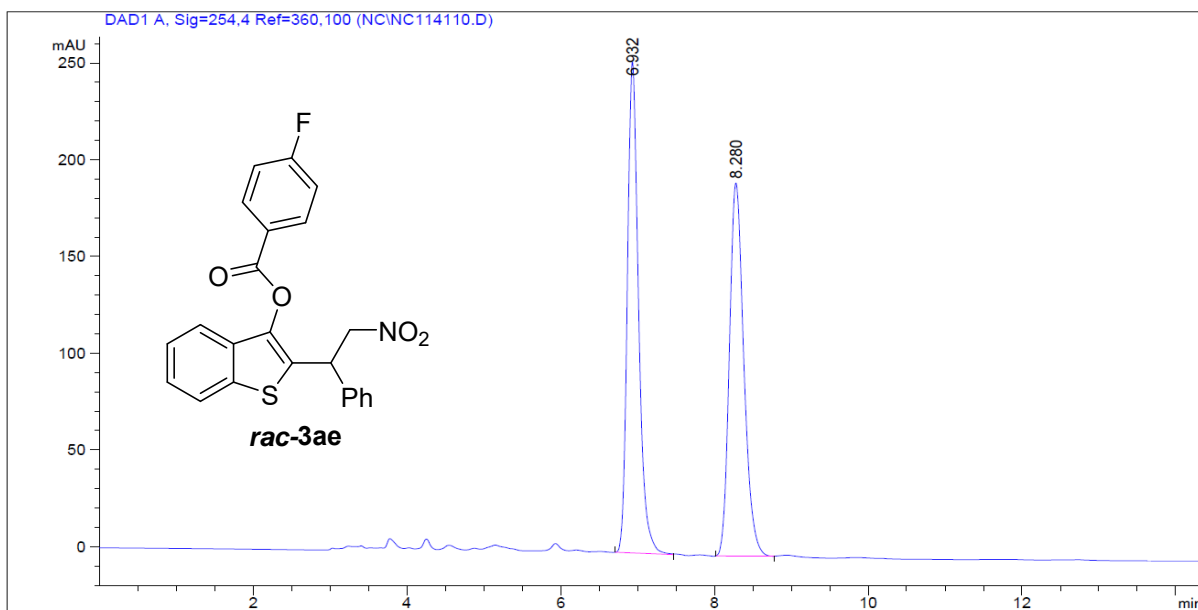

| Peak # | RetTime [min] | Type | Width [min] | Area [mAU*s] | Height [mAU] | Area %  |
|--------|---------------|------|-------------|--------------|--------------|---------|
| 1      | 6.932         | BB   | 0.1535      | 2558.28174   | 254.01802    | 50.4478 |
| 2      | 8.280         | BB   | 0.2000      | 2512.86572   | 192.92363    | 49.5522 |

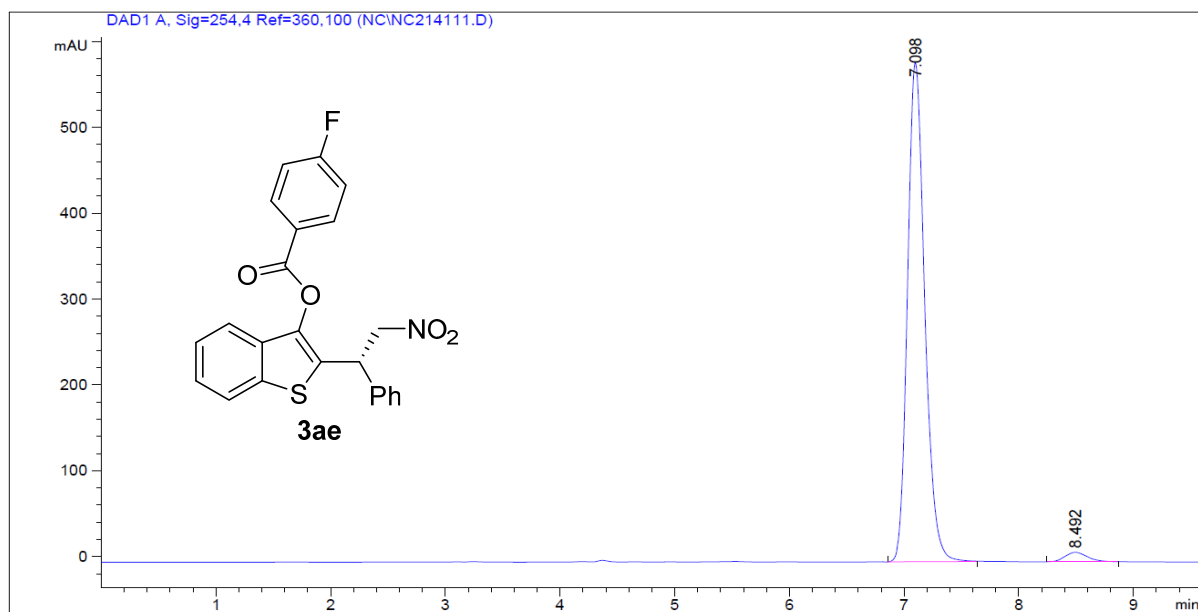

| Peak # | RetTime [min] | Type | Width [min] | Area [mAU*s] | Height [mAU] | Area %  |
|--------|---------------|------|-------------|--------------|--------------|---------|
| 1      | 7.098         | BB   | 0.1613      | 6046.92676   | 581.67004    | 97.5587 |
| 2      | 8.492         | BB   | 0.2120      | 151.32031    | 11.03185     | 2.4413  |

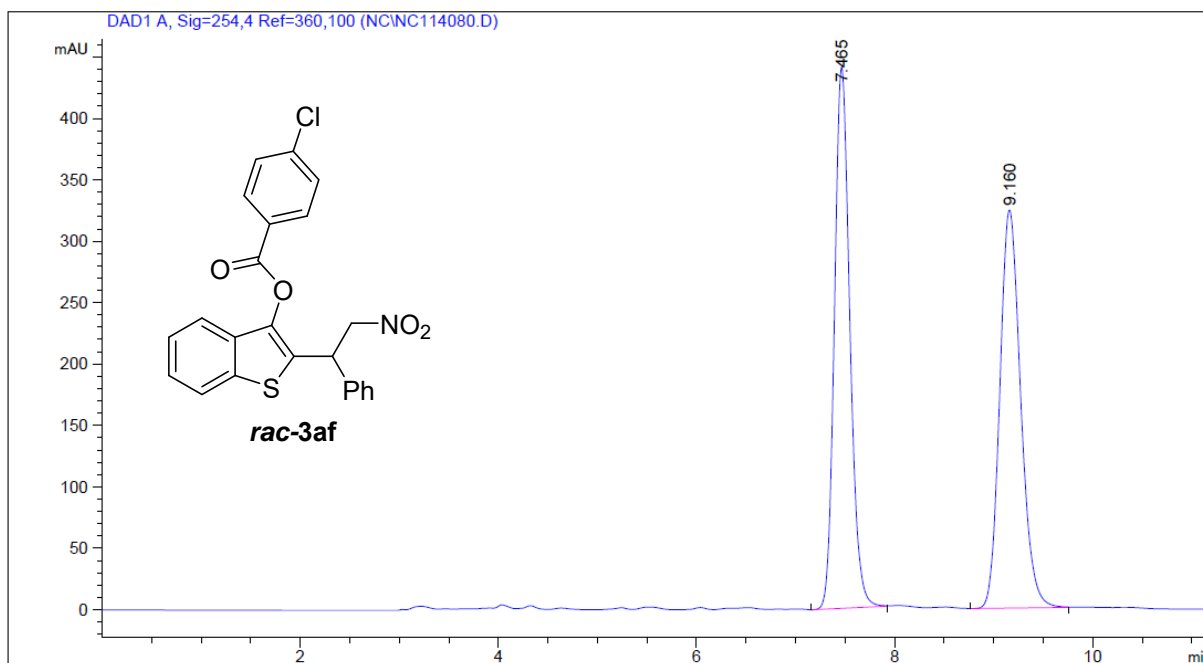

| Peak # | RetTime [min] | Type | Width [min] | Area [mAU*s] | Height [mAU] | Area %  |
|--------|---------------|------|-------------|--------------|--------------|---------|
| 1      | 7.465         | VB   | 0.1658      | 4755.33740   | 440.87869    | 50.0642 |
| 2      | 9.160         | VB   | 0.2247      | 4743.14551   | 324.11017    | 49.9358 |

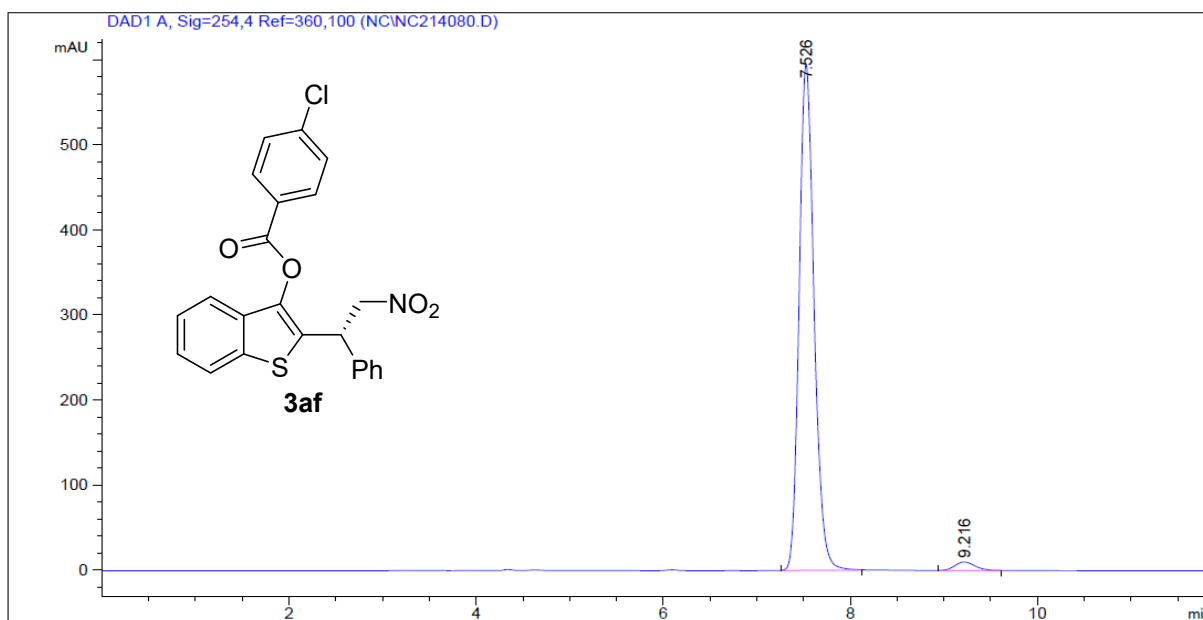

| Peak # | RetTime [min] | Type | Width [min] | Area [mAU*s] | Height [mAU] | Area %  |
|--------|---------------|------|-------------|--------------|--------------|---------|
| 1      | 7.526         | BB   | 0.1692      | 6601.14551   | 595.90704    | 97.7625 |
| 2      | 9.216         | BB   | 0.2329      | 151.08098    | 10.07567     | 2.2375  |

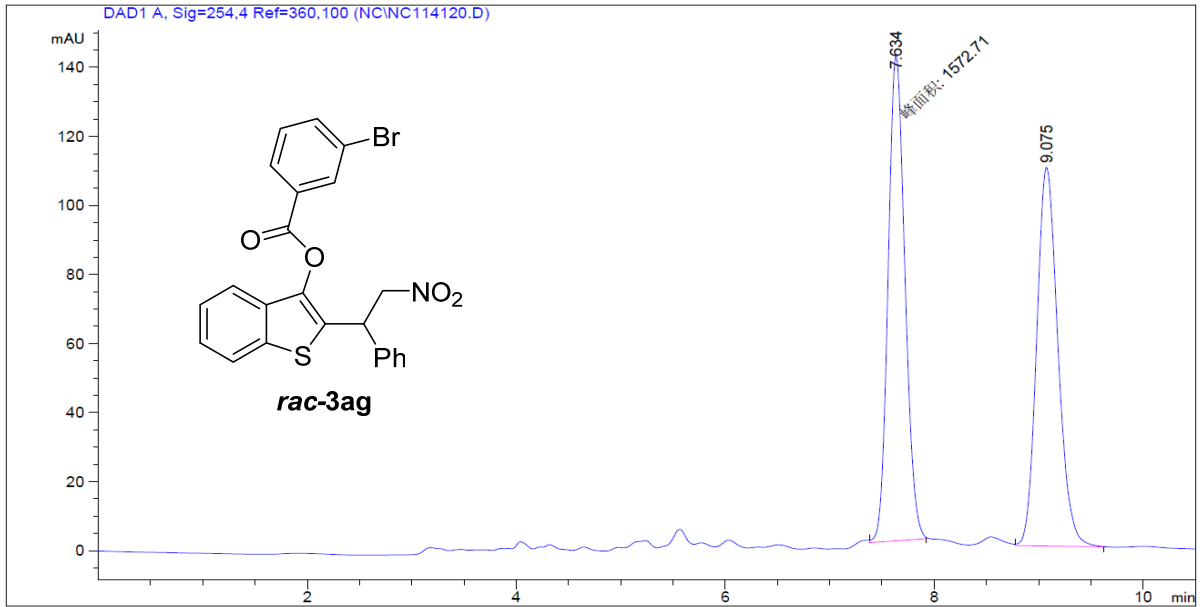

| Peak # | RetTime [min] | Type | Width [min] | Area [mAU*s] | Height [mAU] | Area %  |
|--------|---------------|------|-------------|--------------|--------------|---------|
| 1      | 7.634         | MM   | 0.1864      | 1572.70789   | 140.60677    | 50.3994 |
| 2      | 9.075         | VB   | 0.2186      | 1547.78149   | 109.67541    | 49.6006 |

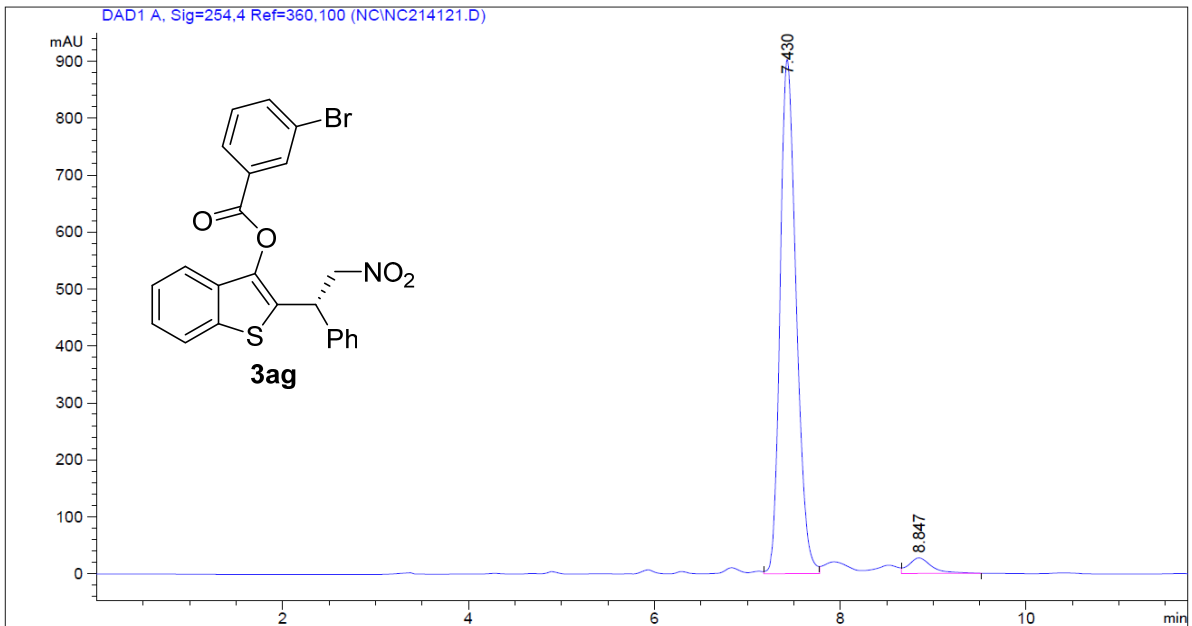

| Peak # | RetTime [min] | Type | Width [min] | Area [mAU*s] | Height [mAU] | Area %  |
|--------|---------------|------|-------------|--------------|--------------|---------|
| 1      | 7.430         | VV   | 0.1843      | 1.08644e4    | 903.56592    | 95.7850 |
| 2      | 8.847         | VB   | 0.2561      | 478.08435    | 27.32607     | 4.2150  |

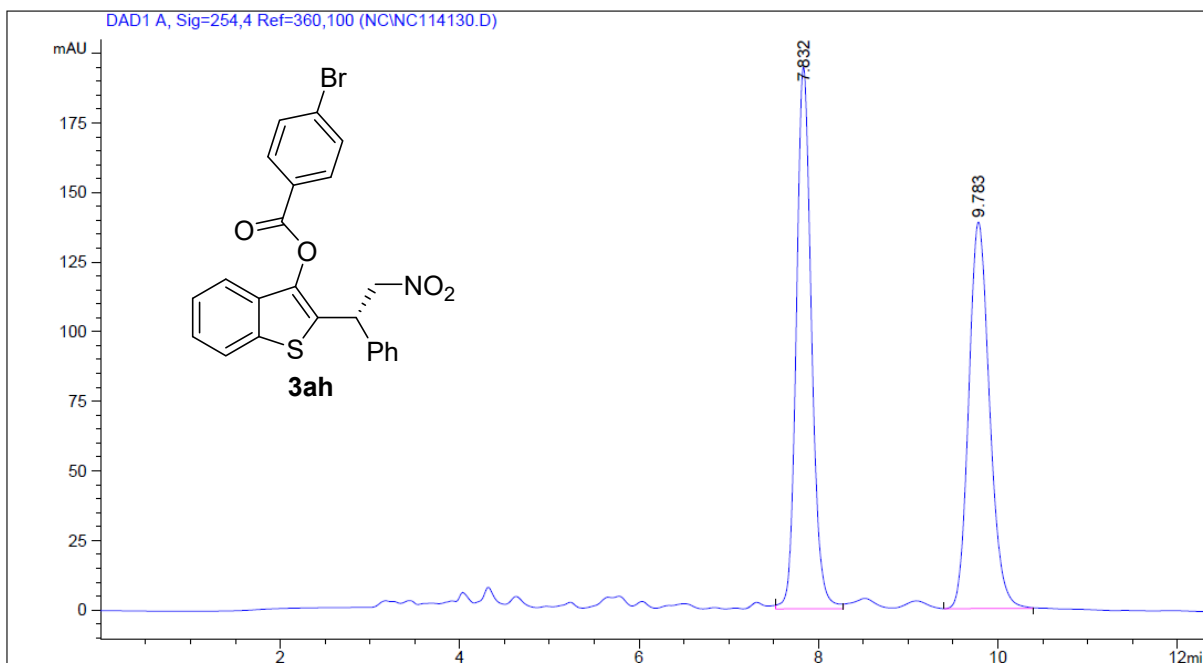

| Peak # | RetTime [min] | Type | Width [min] | Area [mAU*s] | Height [mAU] | Area %  |
|--------|---------------|------|-------------|--------------|--------------|---------|
| 1      | 7.832         | BB   | 0.1809      | 2287.29297   | 194.85368    | 50.5429 |
| 2      | 9.783         | VB   | 0.2501      | 2238.15771   | 138.85237    | 49.4571 |

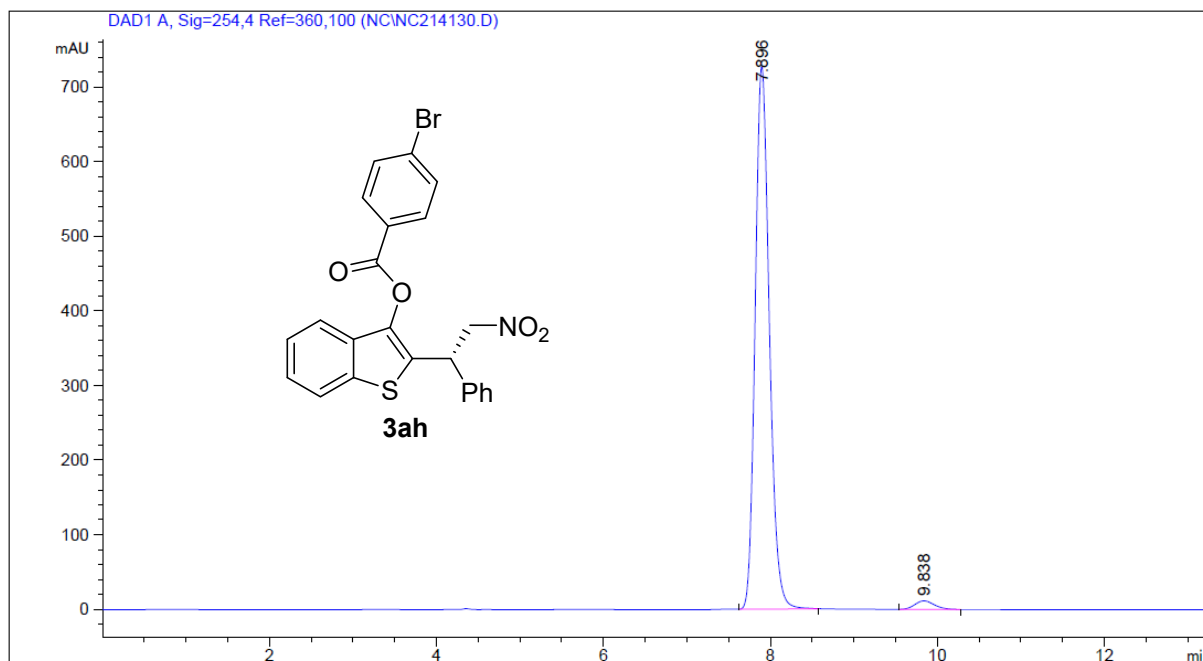

| Peak # | RetTime [min] | Type | Width [min] | Area [mAU*s] | Height [mAU] | Area %  |
|--------|---------------|------|-------------|--------------|--------------|---------|
| 1      | 7.896         | BB   | 0.1814      | 8571.41895   | 727.74701    | 97.8421 |
| 2      | 9.838         | BB   | 0.2513      | 189.03802    | 11.52719     | 2.1579  |

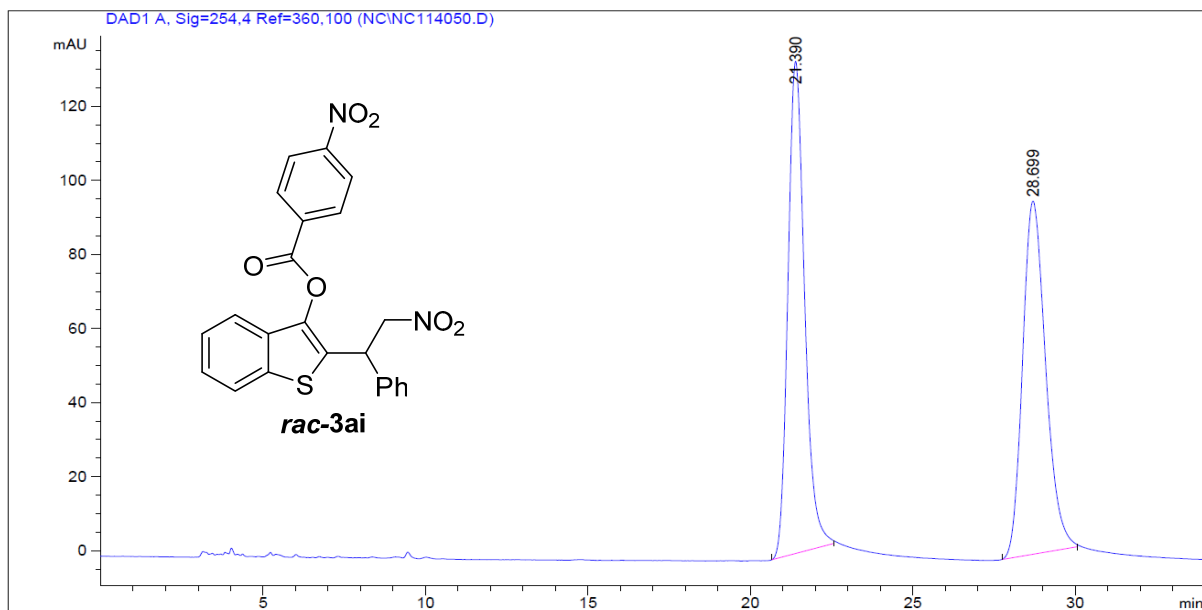

| Peak # | RetTime [min] | Type | Width [min] | Area [mAU*s] | Height [mAU] | Area %  |
|--------|---------------|------|-------------|--------------|--------------|---------|
| 1      | 21.390        | BB   | 0.5436      | 4736.08594   | 132.94809    | 50.1661 |
| 2      | 28.699        | BB   | 0.7635      | 4704.71729   | 95.36868     | 49.8339 |

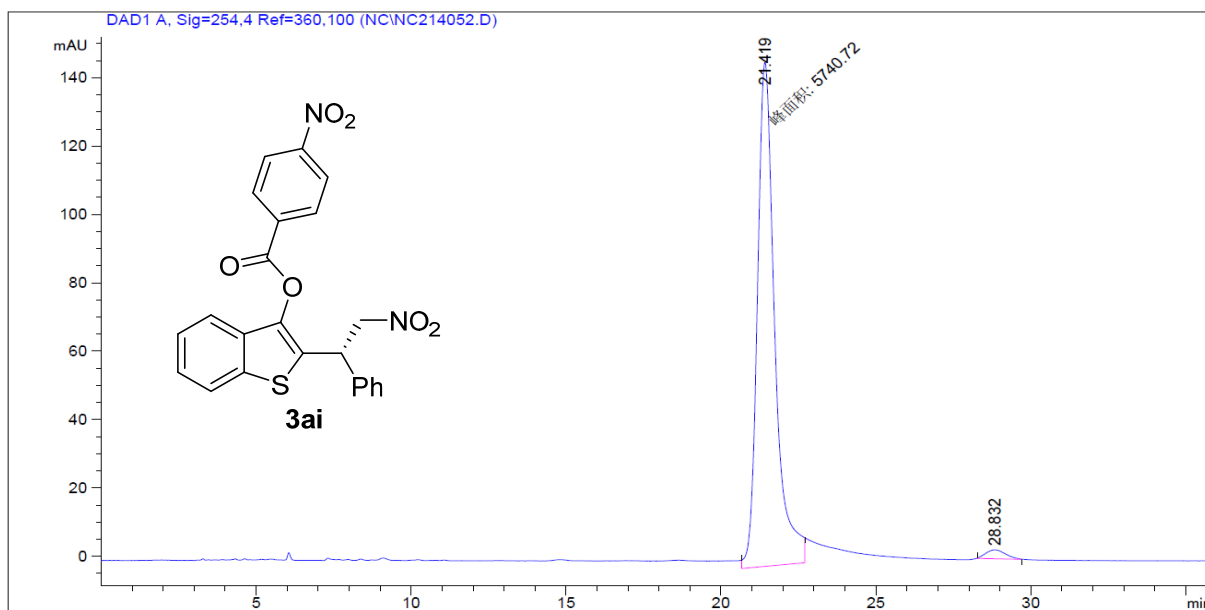

| Peak # | RetTime [min] | Type | Width [min] | Area [mAU*s] | Height [mAU] | Area %  |
|--------|---------------|------|-------------|--------------|--------------|---------|
| 1      | 21.419        | MM   | 0.6490      | 5740.71582   | 147.42224    | 98.0358 |
| 2      | 28.832        | BB   | 0.5285      | 115.02074    | 2.61831      | 1.9642  |

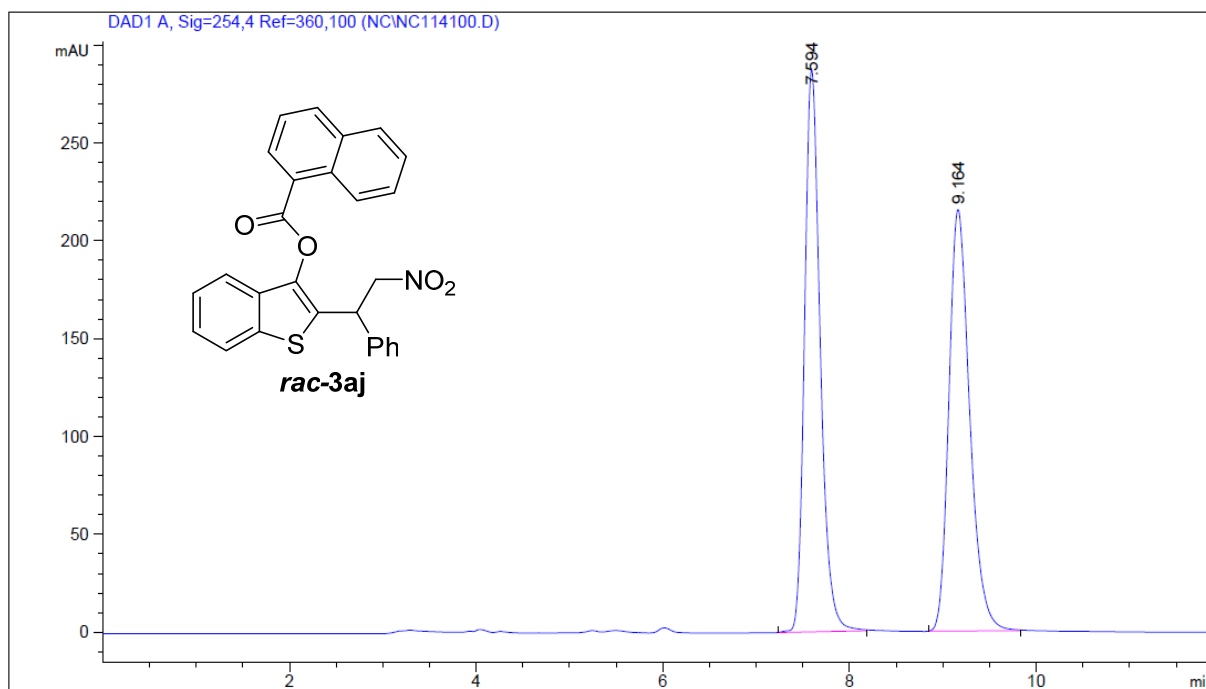

| Peak # | RetTime [min] | Type | Width [min] | Area [mAU*s] | Height [mAU] | Area %  |
|--------|---------------|------|-------------|--------------|--------------|---------|
| 1      | 7.594         | BB   | 0.1782      | 3352.94067   | 287.15662    | 50.0913 |
| 2      | 9.164         | BB   | 0.2370      | 3340.72070   | 215.37683    | 49.9087 |

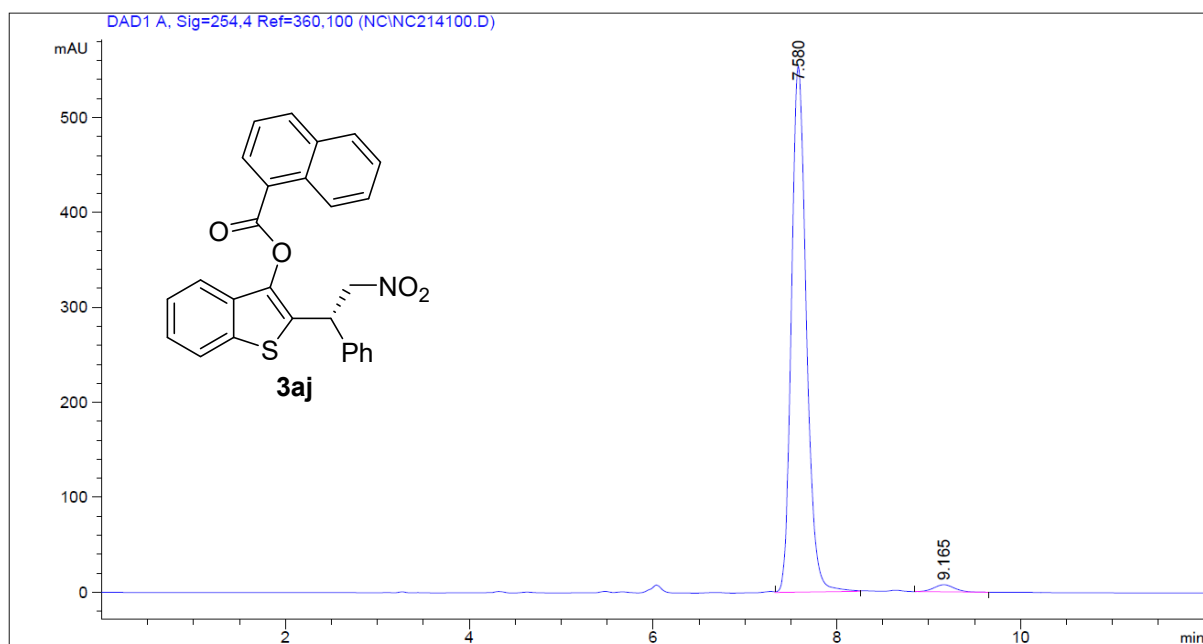

| Peak # | RetTime [min] | Type | Width [min] | Area [mAU*s] | Height [mAU] | Area %  |
|--------|---------------|------|-------------|--------------|--------------|---------|
| 1      | 7.580         | VB   | 0.1736      | 6247.54297   | 553.93451    | 98.1700 |
| 2      | 9.165         | VB   | 0.2419      | 116.46260    | 7.47081      | 1.8300  |

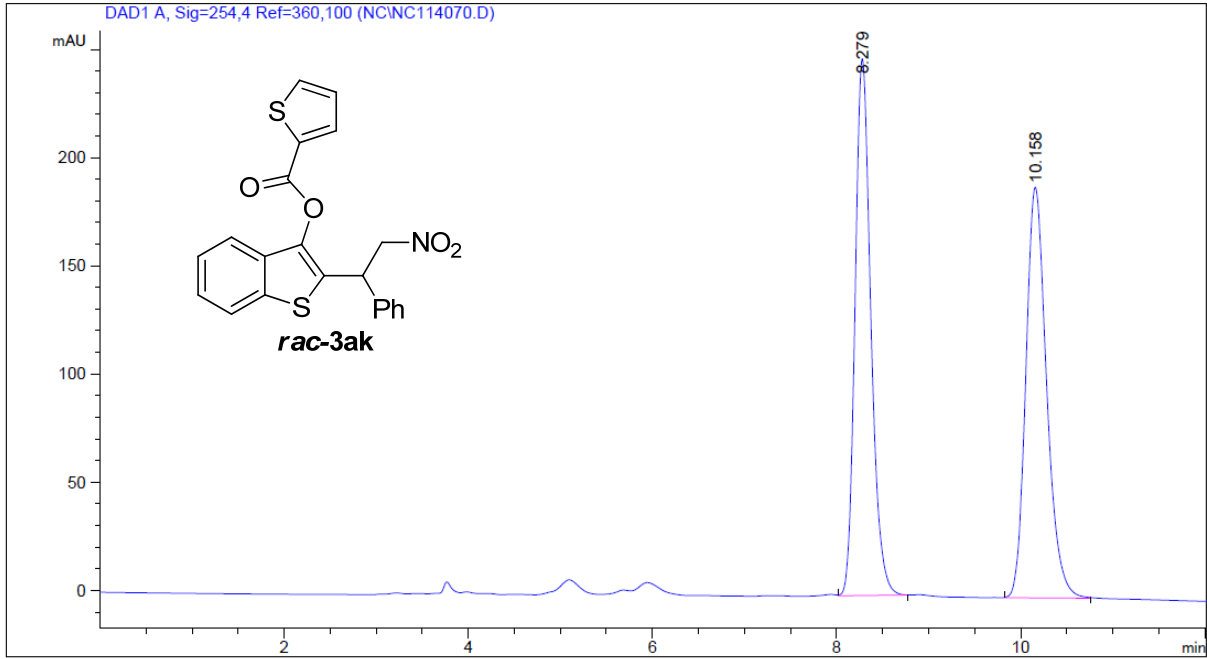

| Peak # | RetTime [min] | Type | Width [min] | Area [mAU*s] | Height [mAU] | Area %  |
|--------|---------------|------|-------------|--------------|--------------|---------|
| 1      | 8.279         | VB   | 0.1830      | 2955.59180   | 248.13443    | 49.8969 |
| 2      | 10.158        | BB   | 0.2385      | 2967.80151   | 189.76013    | 50.1031 |

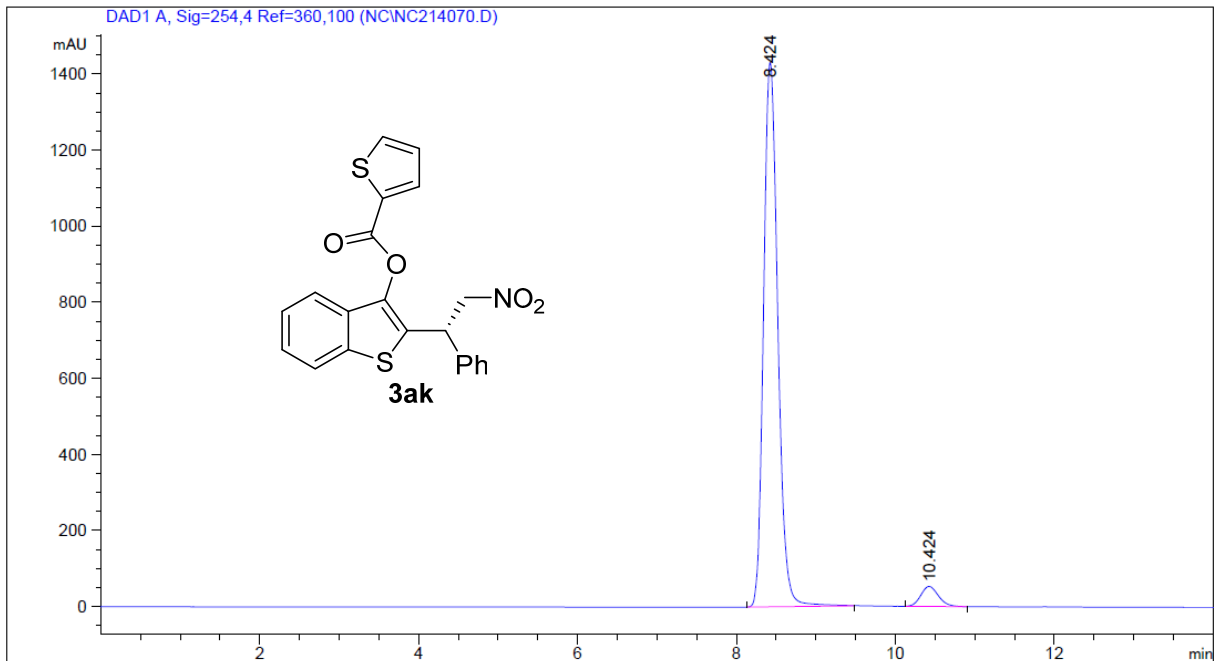

| Peak # | RetTime [min] | Type | Width [min] | Area [mAU*s] | Height [mAU] | Area %  |
|--------|---------------|------|-------------|--------------|--------------|---------|
| 1      | 8.424         | BB   | 0.1929      | 1.77729e4    | 1431.04163   | 95.6292 |
| 2      | 10.424        | BB   | 0.2380      | 812.31348    | 52.65337     | 4.3708  |

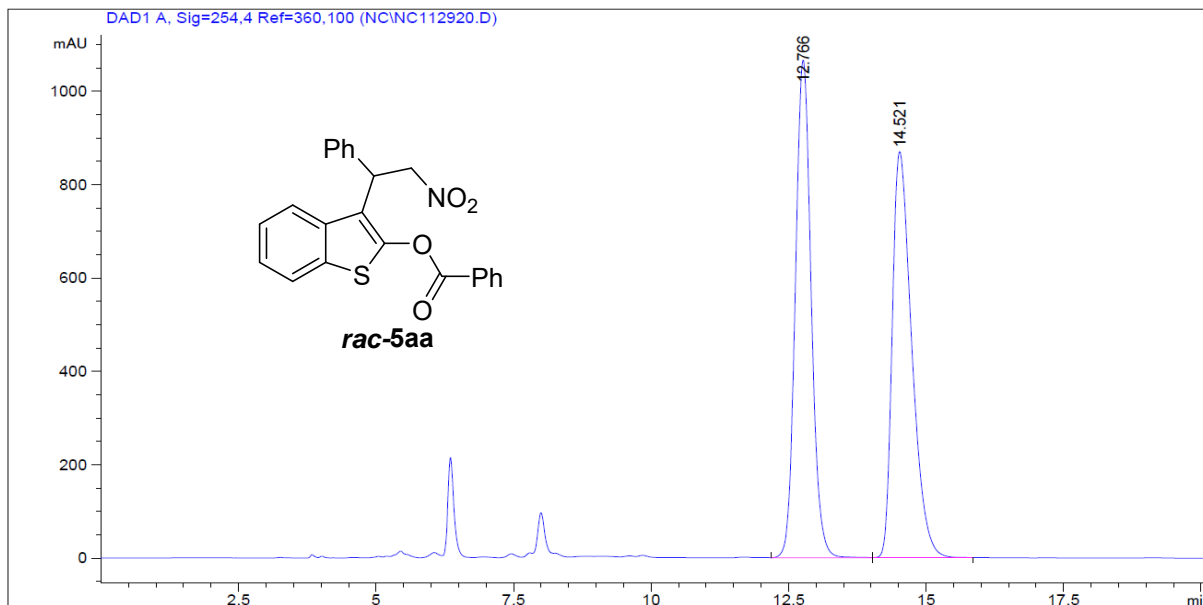

| Peak # | RetTime [min] | Type | Width [min] | Area [mAU*s] | Height [mAU] | Area %  |
|--------|---------------|------|-------------|--------------|--------------|---------|
| 1      | 12.766        | VV   | 0.3098      | 2.13660e4    | 1066.23230   | 49.9150 |
| 2      | 14.521        | VB   | 0.3795      | 2.14388e4    | 869.98230    | 50.0850 |

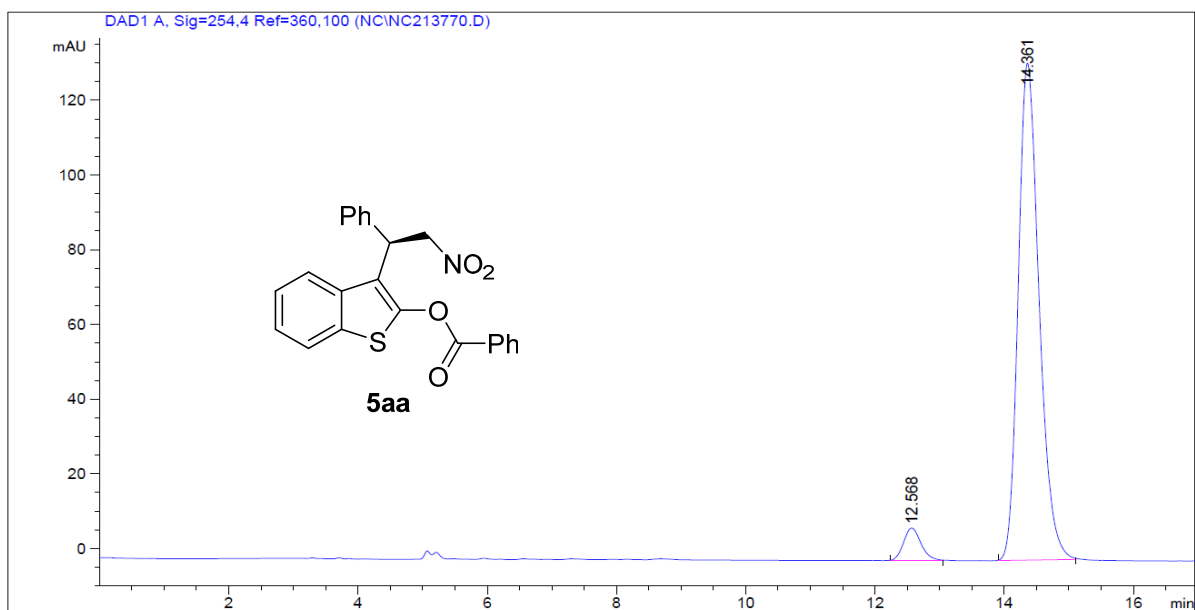

| Peak # | RetTime [min] | Type | Width [min] | Area [mAU*s] | Height [mAU] | Area %  |
|--------|---------------|------|-------------|--------------|--------------|---------|
| 1      | 12.568        | BB   | 0.2817      | 162.31677    | 8.69752      | 5.1589  |
| 2      | 14.361        | BB   | 0.3456      | 2984.01538   | 133.06688    | 94.8411 |



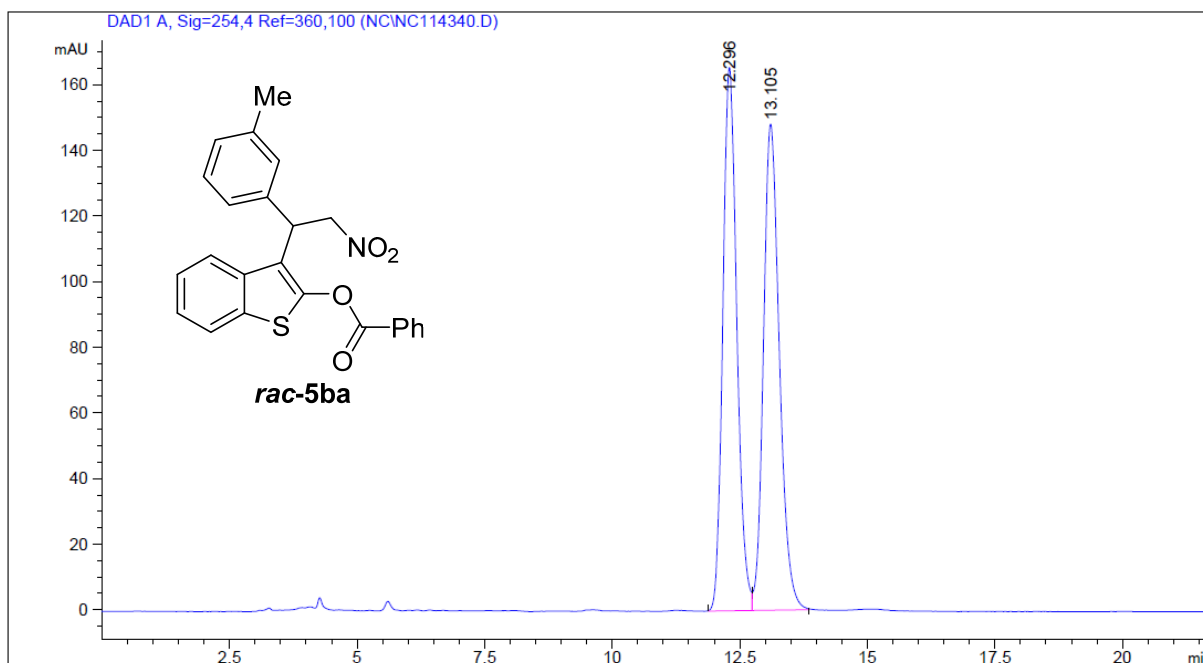

| Peak # | RetTime [min] | Type | Width [min] | Area [mAU*s] | Height [mAU] | Area %  |
|--------|---------------|------|-------------|--------------|--------------|---------|
| 1      | 12.296        | BV   | 0.2944      | 3156.19897   | 165.57129    | 49.5230 |
| 2      | 13.105        | VB   | 0.3314      | 3217.00293   | 148.12973    | 50.4770 |

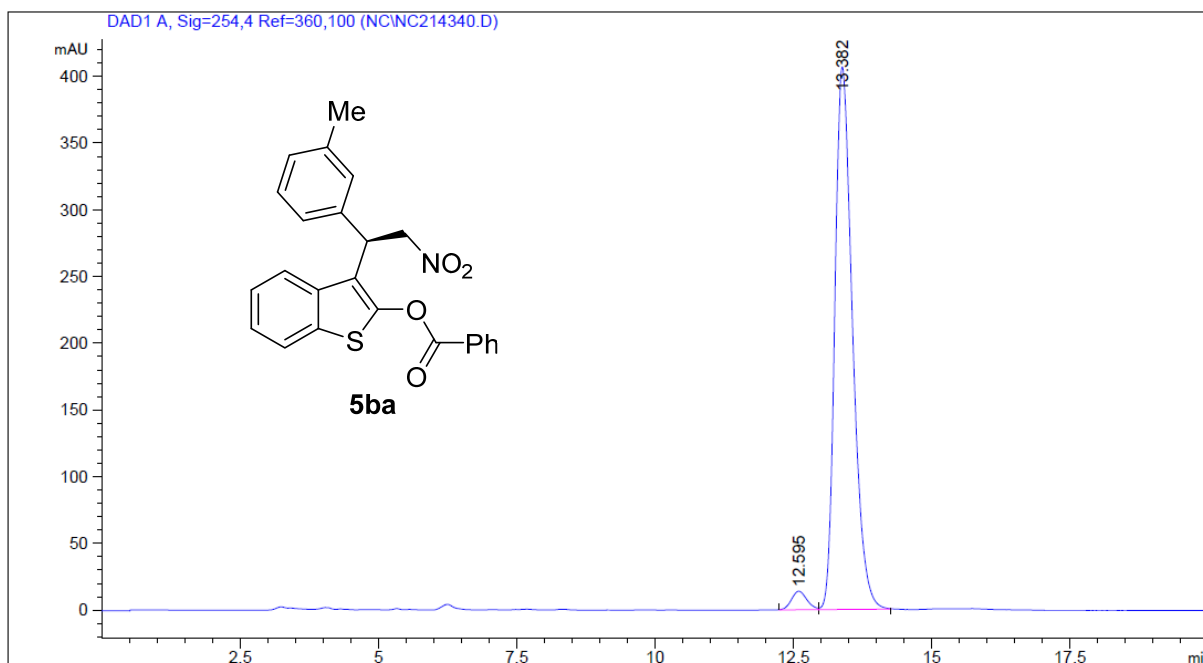

| Peak # | RetTime [min] | Type | Width [min] | Area [mAU*s] | Height [mAU] | Area %  |
|--------|---------------|------|-------------|--------------|--------------|---------|
| 1      | 12.595        | BV   | 0.2945      | 268.10394    | 13.93276     | 2.8893  |
| 2      | 13.382        | VB   | 0.3405      | 9011.01953   | 406.72440    | 97.1107 |

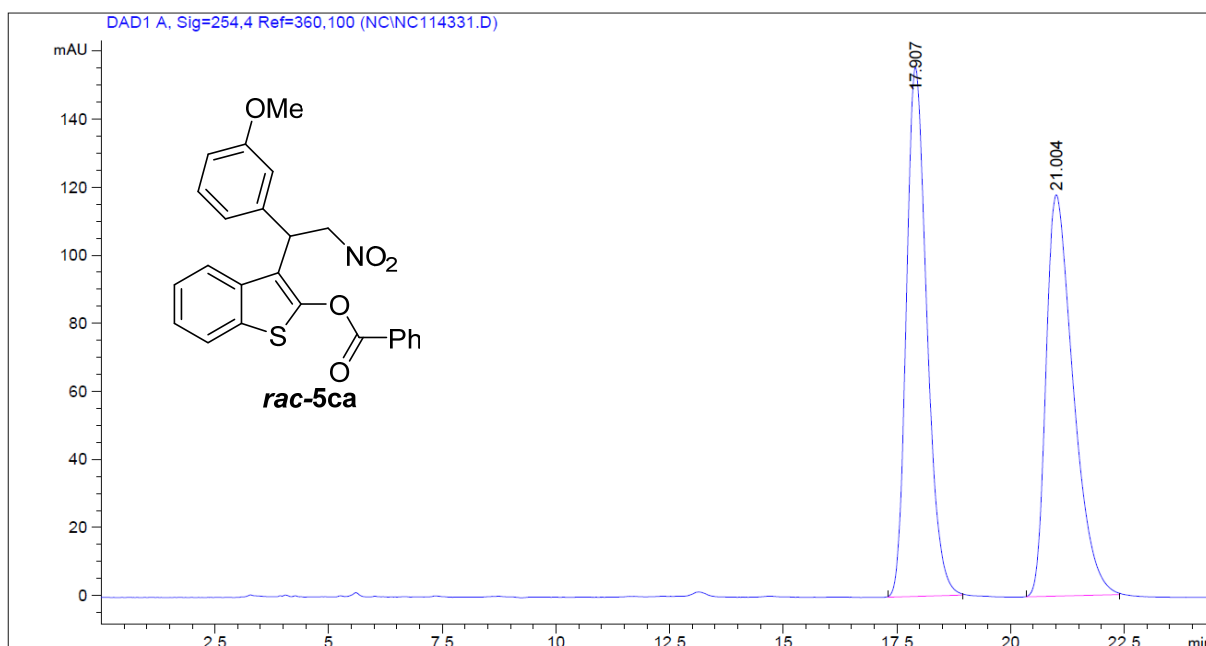

| Peak # | RetTime [min] | Type | Width [min] | Area [mAU*s] | Height [mAU] | Area %  |
|--------|---------------|------|-------------|--------------|--------------|---------|
| 1      | 17.907        | BB   | 0.4836      | 4872.92871   | 155.48630    | 49.7604 |
| 2      | 21.004        | BB   | 0.6266      | 4919.86230   | 117.96192    | 50.2396 |

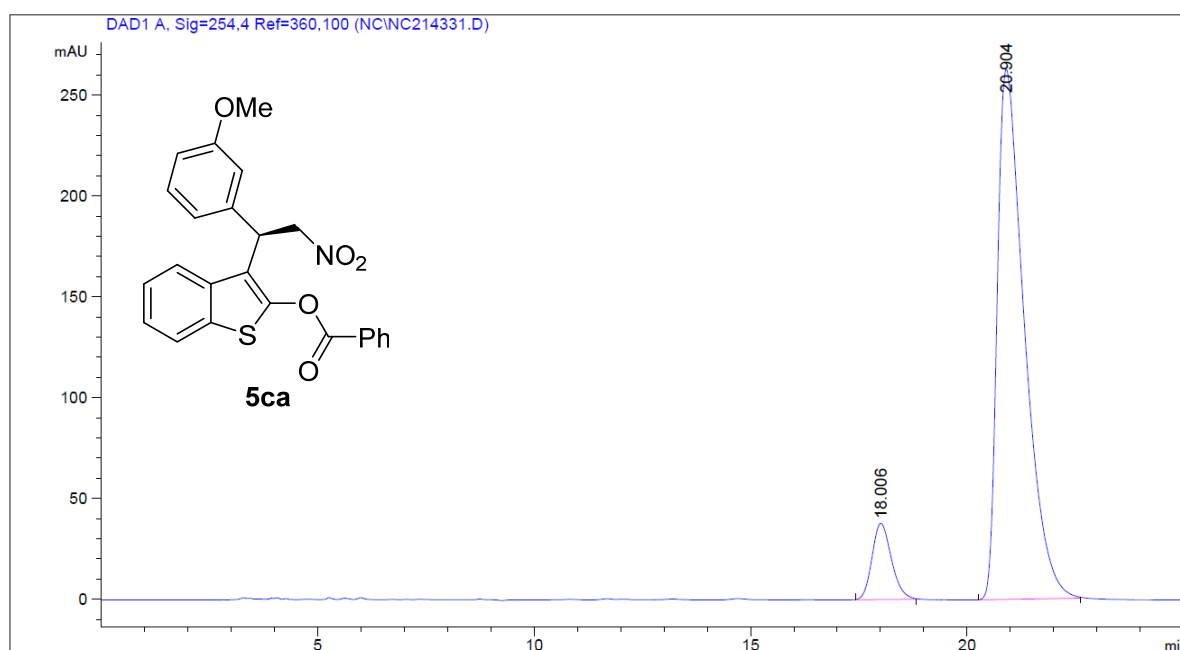

| Peak # | RetTime [min] | Type | Width [min] | Area [mAU*s] | Height [mAU] | Area %  |
|--------|---------------|------|-------------|--------------|--------------|---------|
| 1      | 18.006        | BB   | 0.4772      | 1178.54932   | 37.85860     | 9.3380  |
| 2      | 20.904        | BB   | 0.6538      | 1.14425e4    | 262.89716    | 90.6620 |

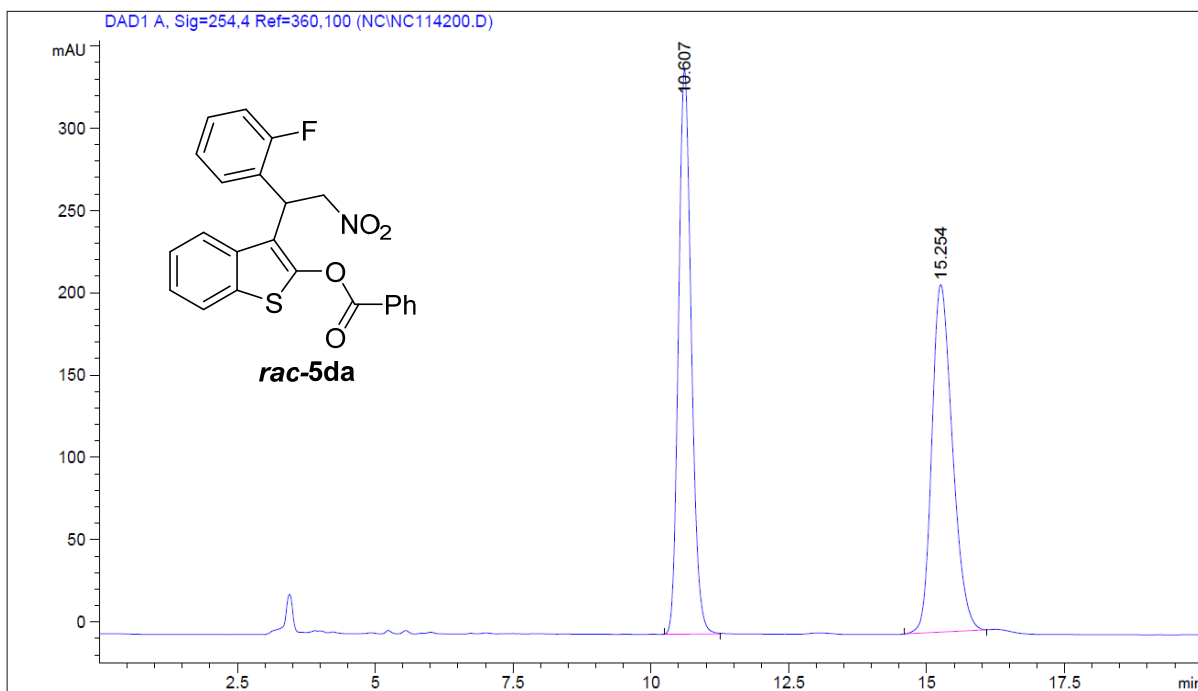

| Peak # | RetTime [min] | Type | Width [min] | Area [mAU*s] | Height [mAU] | Area %  |
|--------|---------------|------|-------------|--------------|--------------|---------|
| 1      | 10.607        | BB   | 0.2487      | 5552.13770   | 343.34833    | 50.2172 |
| 2      | 15.254        | BB   | 0.4021      | 5504.11621   | 211.15509    | 49.7828 |

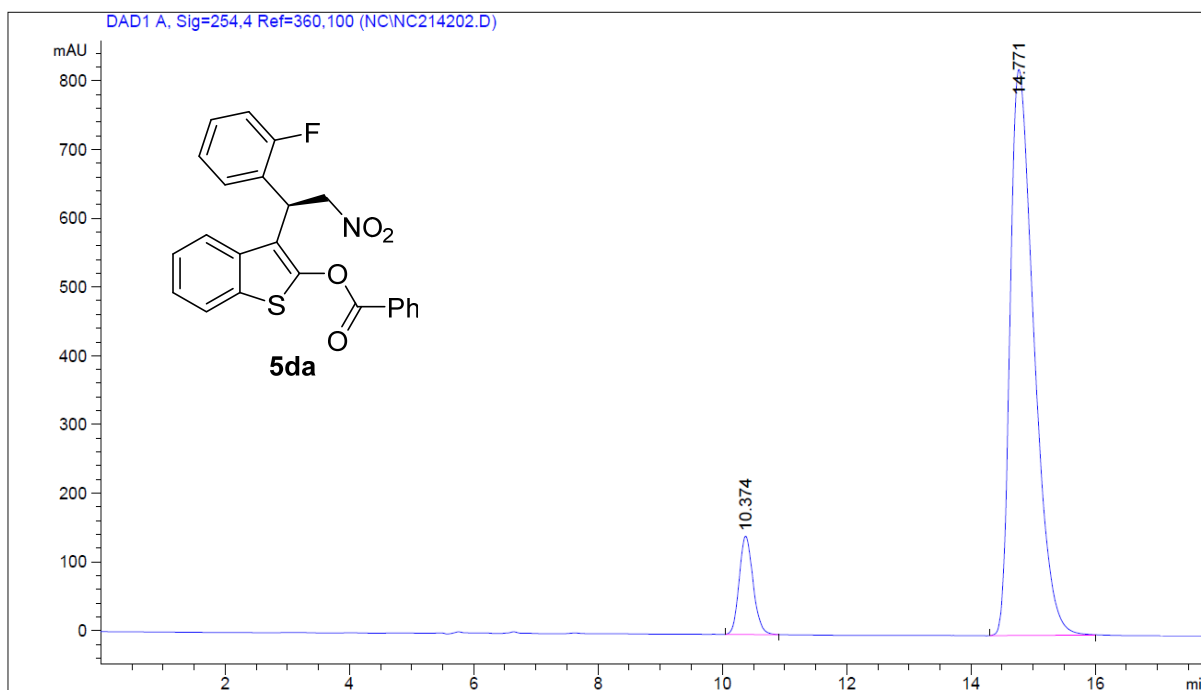

| Peak # | RetTime [min] | Type | Width [min] | Area [mAU*s] | Height [mAU] | Area %  |
|--------|---------------|------|-------------|--------------|--------------|---------|
| 1      | 10.374        | BB   | 0.2396      | 2226.78979   | 143.02846    | 9.2339  |
| 2      | 14.771        | BB   | 0.4102      | 2.18885e4    | 823.33795    | 90.7661 |

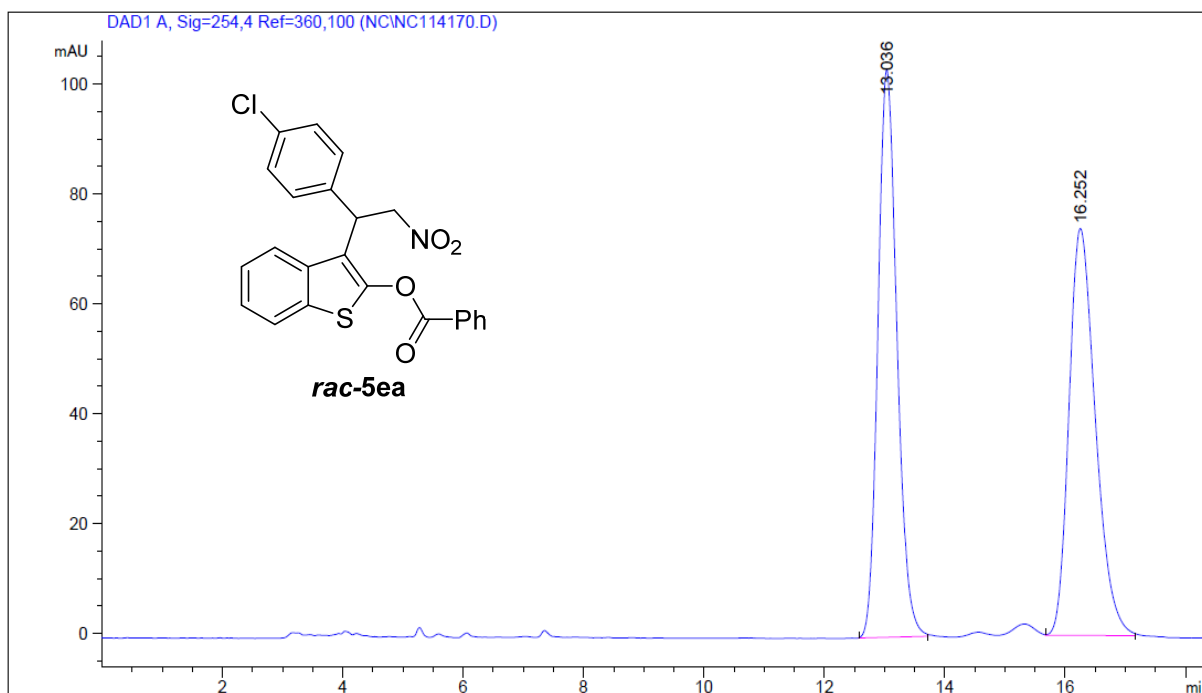

| Peak # | RetTime [min] | Type | Width [min] | Area [mAU*s] | Height [mAU] | Area %  |
|--------|---------------|------|-------------|--------------|--------------|---------|
| 1      | 13.036        | BB   | 0.3379      | 2267.42236   | 103.36366    | 50.0996 |
| 2      | 16.252        | VB   | 0.4716      | 2258.40601   | 74.09304     | 49.9004 |

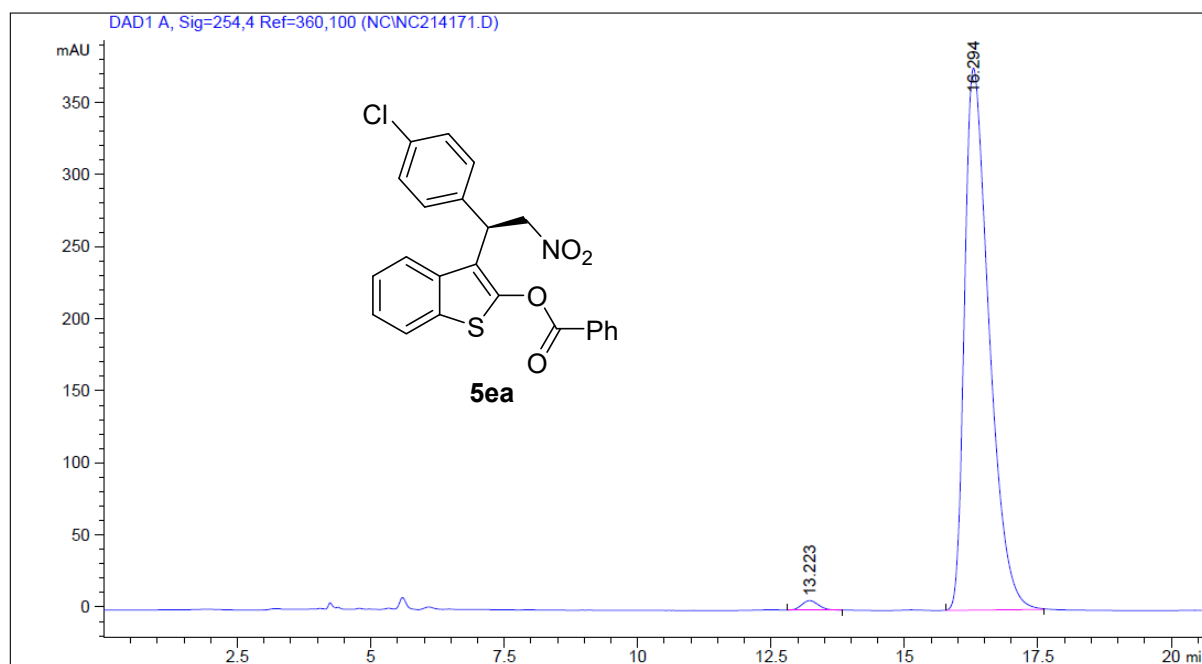

| Peak # | RetTime [min] | Type | Width [min] | Area [mAU*s] | Height [mAU] | Area %  |
|--------|---------------|------|-------------|--------------|--------------|---------|
| 1      | 13.223        | BB   | 0.3307      | 143.27058    | 6.56272      | 1.1771  |
| 2      | 16.294        | BB   | 0.4894      | 1.20281e4    | 375.82846    | 98.8229 |

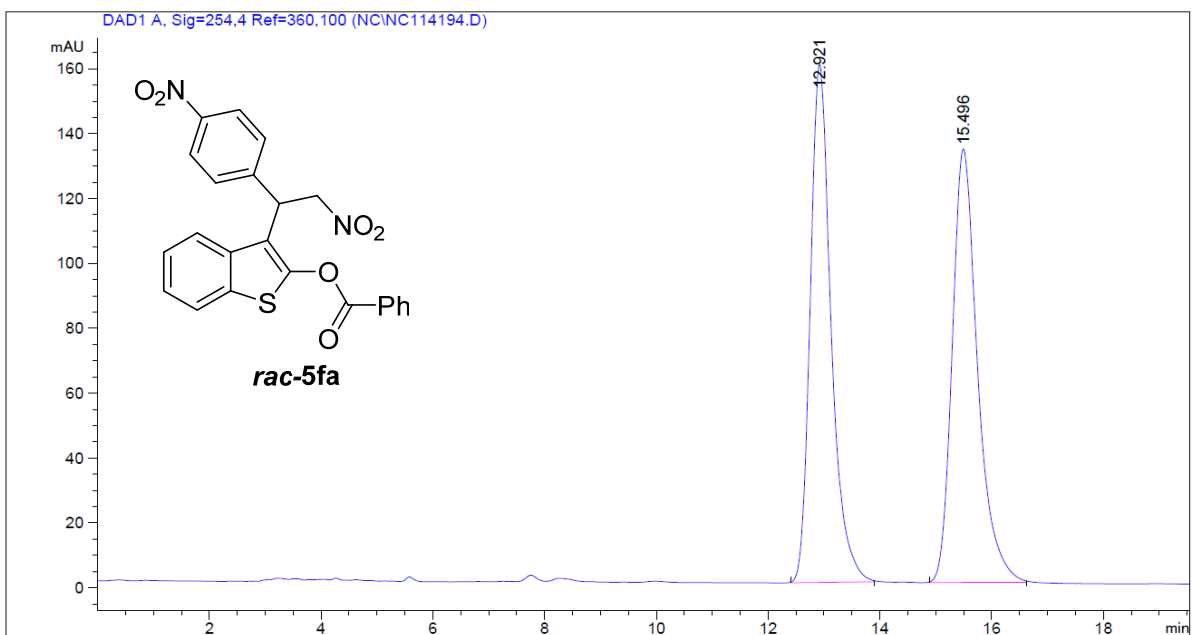

| Peak # | RetTime [min] | Type | Width [min] | Area [mAU*s] | Height [mAU] | Area %  |
|--------|---------------|------|-------------|--------------|--------------|---------|
| 1      | 12.921        | BB   | 0.3926      | 4141.35938   | 159.69089    | 49.6135 |
| 2      | 15.496        | BB   | 0.4772      | 4205.88281   | 133.61923    | 50.3865 |

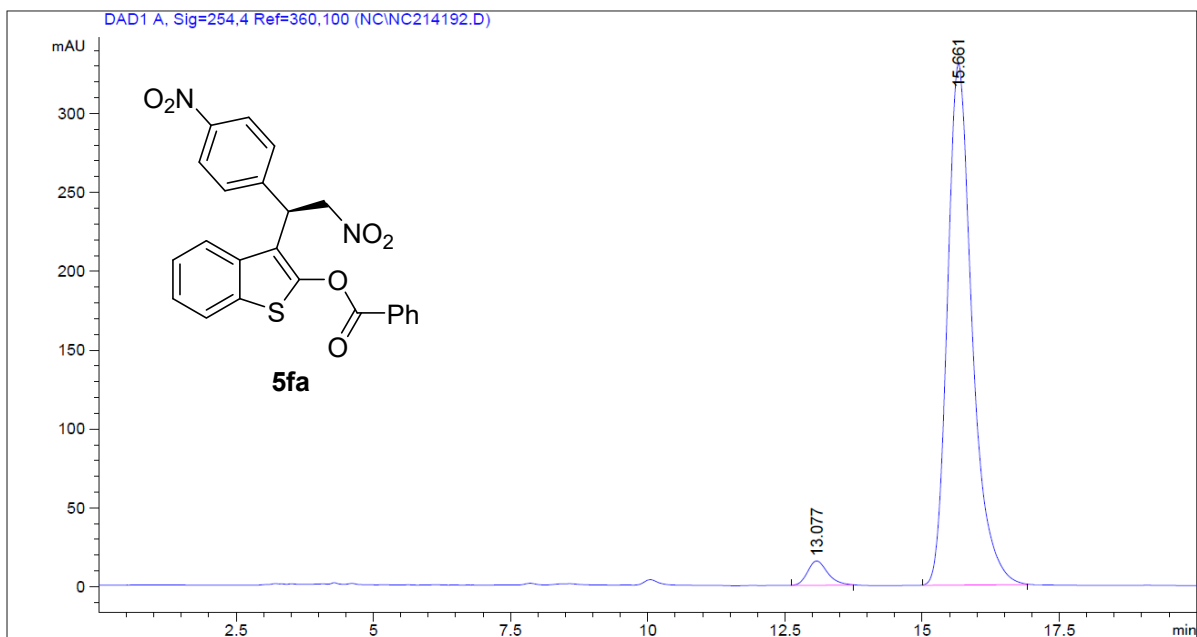

| Peak # | RetTime [min] | Type | Width [min] | Area [mAU*s] | Height [mAU] | Area %  |
|--------|---------------|------|-------------|--------------|--------------|---------|
| 1      | 13.077        | BB   | 0.3907      | 395.05270    | 15.43247     | 3.6705  |
| 2      | 15.661        | BB   | 0.4759      | 1.03678e4    | 330.57544    | 96.3295 |

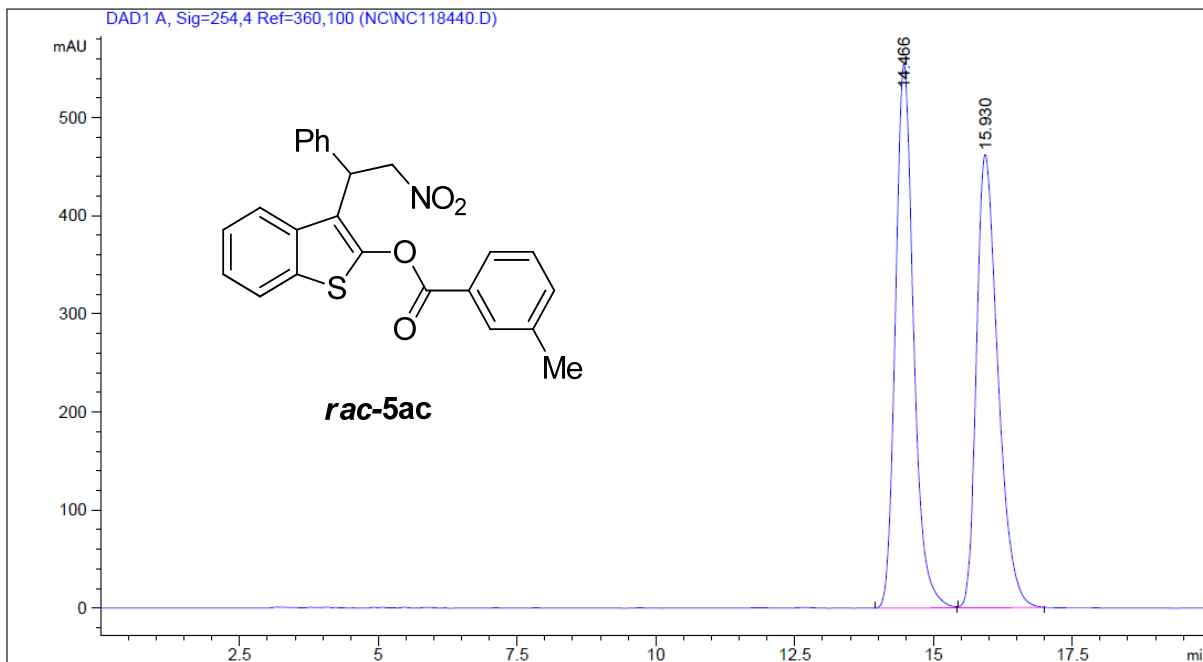

| Peak # | RetTime [min] | Type | Width [min] | Area [mAU*s] | Height [mAU] | Area %  |
|--------|---------------|------|-------------|--------------|--------------|---------|
| 1      | 14.466        | BB   | 0.3494      | 1.26167e4    | 554.54083    | 50.3829 |
| 2      | 15.930        | BB   | 0.4117      | 1.24249e4    | 462.11707    | 49.6171 |

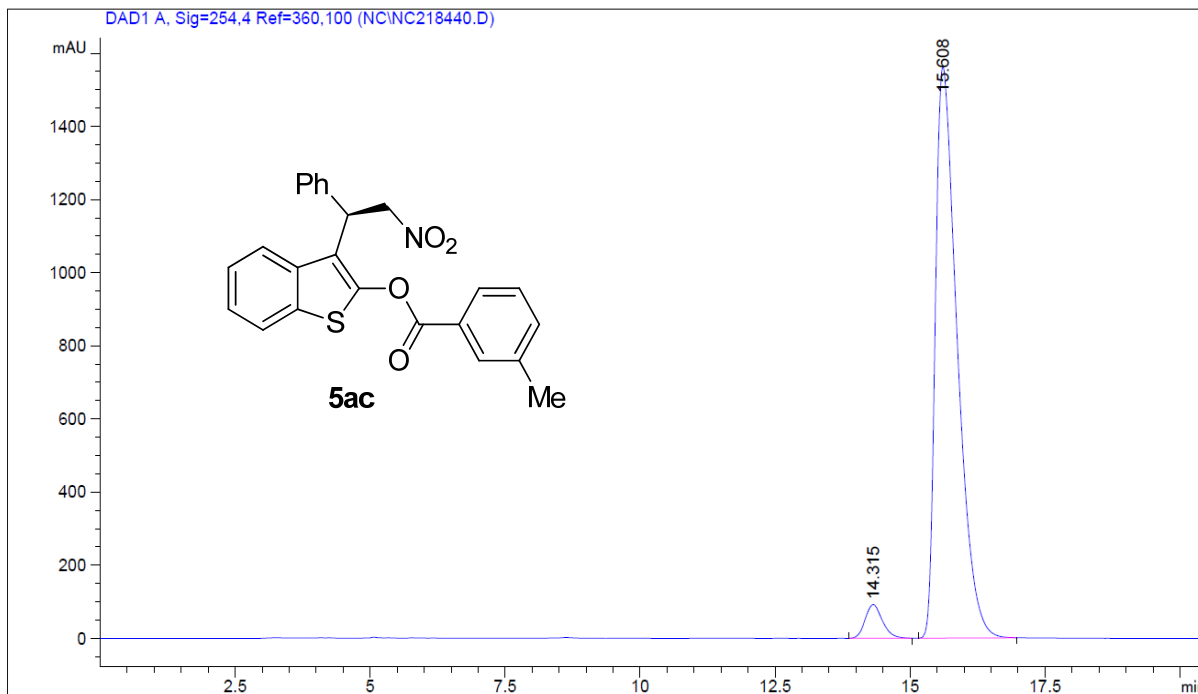

| Peak # | RetTime [min] | Type | Width [min] | Area [mAU*s] | Height [mAU] | Area %  |
|--------|---------------|------|-------------|--------------|--------------|---------|
| 1      | 14.315        | BB   | 0.3409      | 2043.06250   | 92.06934     | 4.4538  |
| 2      | 15.608        | BB   | 0.4273      | 4.38290e4    | 1562.18201   | 95.5462 |

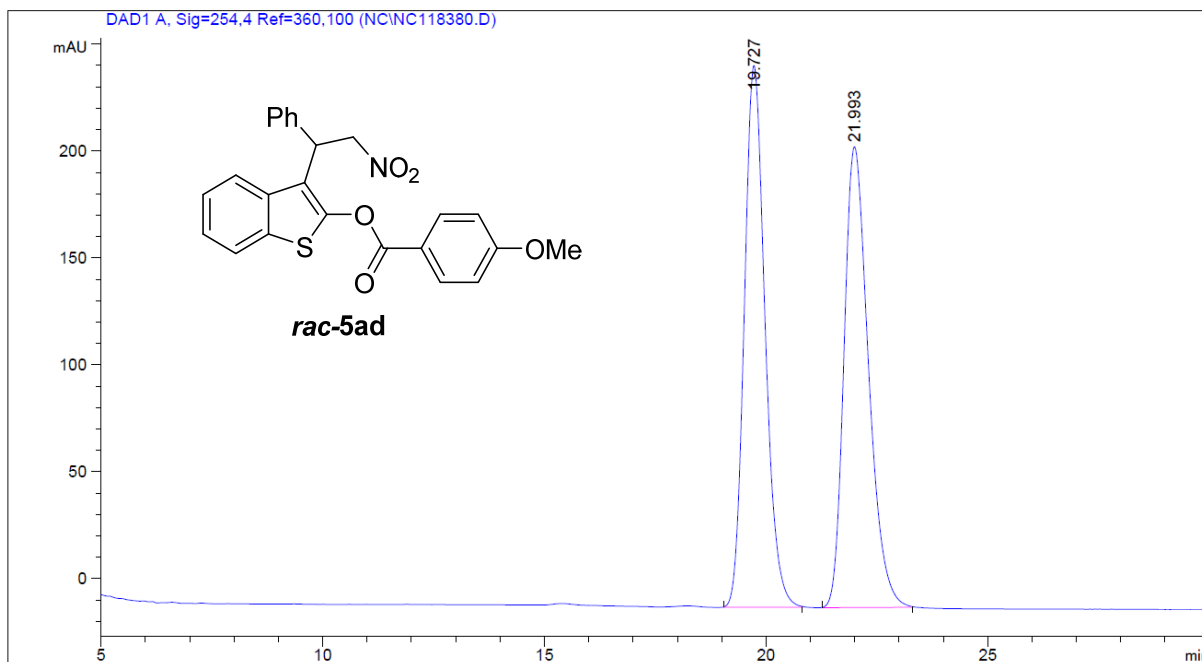

| Peak # | RetTime [min] | Type | Width [min] | Area [mAU*s] | Height [mAU] | Area %  |
|--------|---------------|------|-------------|--------------|--------------|---------|
| 1      | 19.727        | BB   | 0.4986      | 8220.27734   | 253.33257    | 49.9674 |
| 2      | 21.993        | BB   | 0.5876      | 8231.01367   | 215.50906    | 50.0326 |

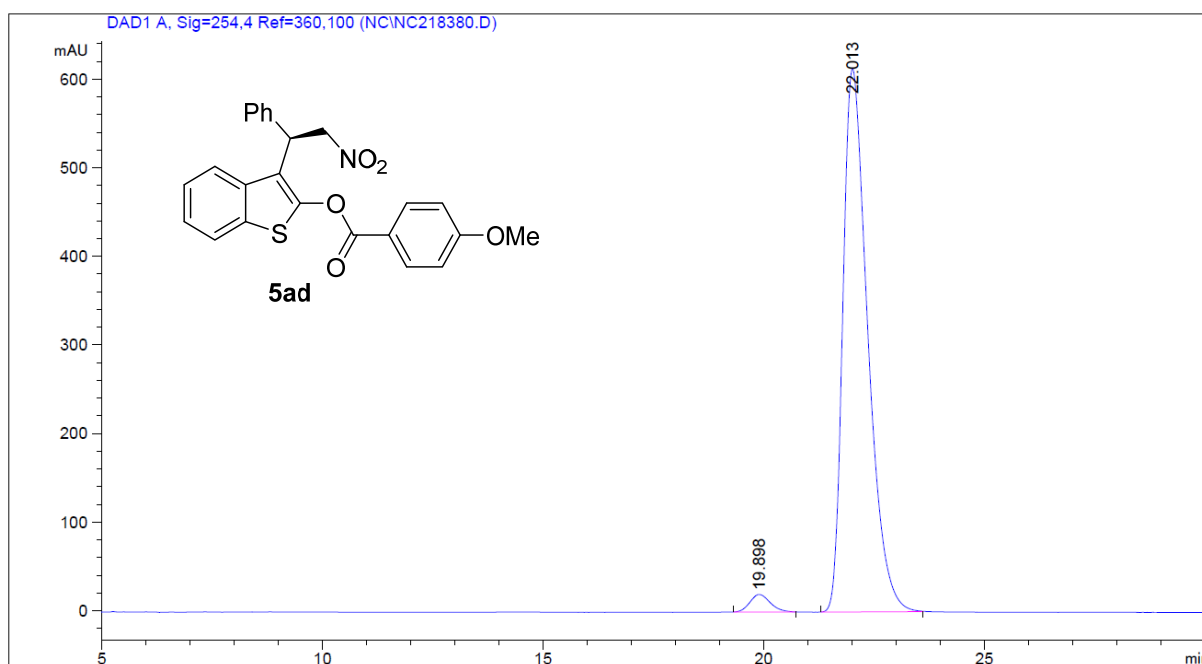

| Peak # | RetTime [min] | Type | Width [min] | Area [mAU*s] | Height [mAU] | Area %  |
|--------|---------------|------|-------------|--------------|--------------|---------|
| 1      | 19.898        | BB   | 0.4886      | 642.18207    | 19.89437     | 2.6186  |
| 2      | 22.013        | BB   | 0.5945      | 2.38818e4    | 613.01630    | 97.3814 |

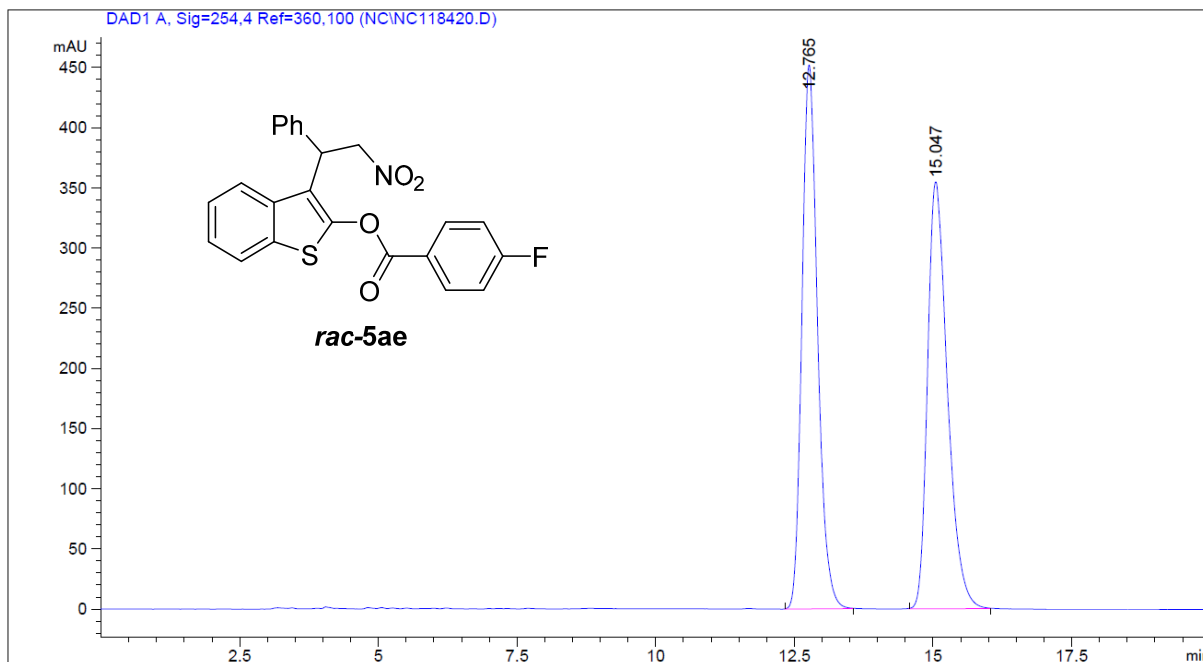

| Peak # | RetTime [min] | Type | Width [min] | Area [mAU*s] | Height [mAU] | Area %  |
|--------|---------------|------|-------------|--------------|--------------|---------|
| 1      | 12.765        | BB   | 0.3004      | 8848.68652   | 452.02194    | 50.0444 |
| 2      | 15.047        | BB   | 0.3825      | 8832.97852   | 354.75439    | 49.9556 |

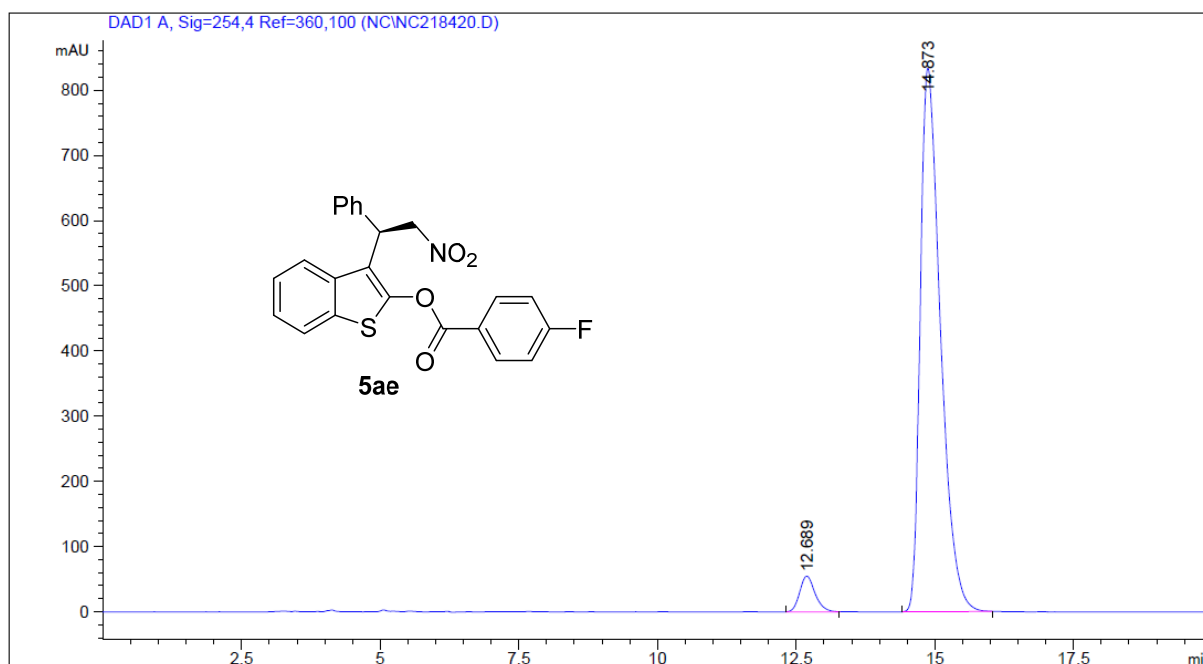

| Peak # | RetTime [min] | Type | Width [min] | Area [mAU*s] | Height [mAU] | Area %  |
|--------|---------------|------|-------------|--------------|--------------|---------|
| 1      | 12.689        | BB   | 0.2968      | 1065.35730   | 54.80965     | 4.8004  |
| 2      | 14.873        | BB   | 0.3875      | 2.11278e4    | 834.24036    | 95.1996 |



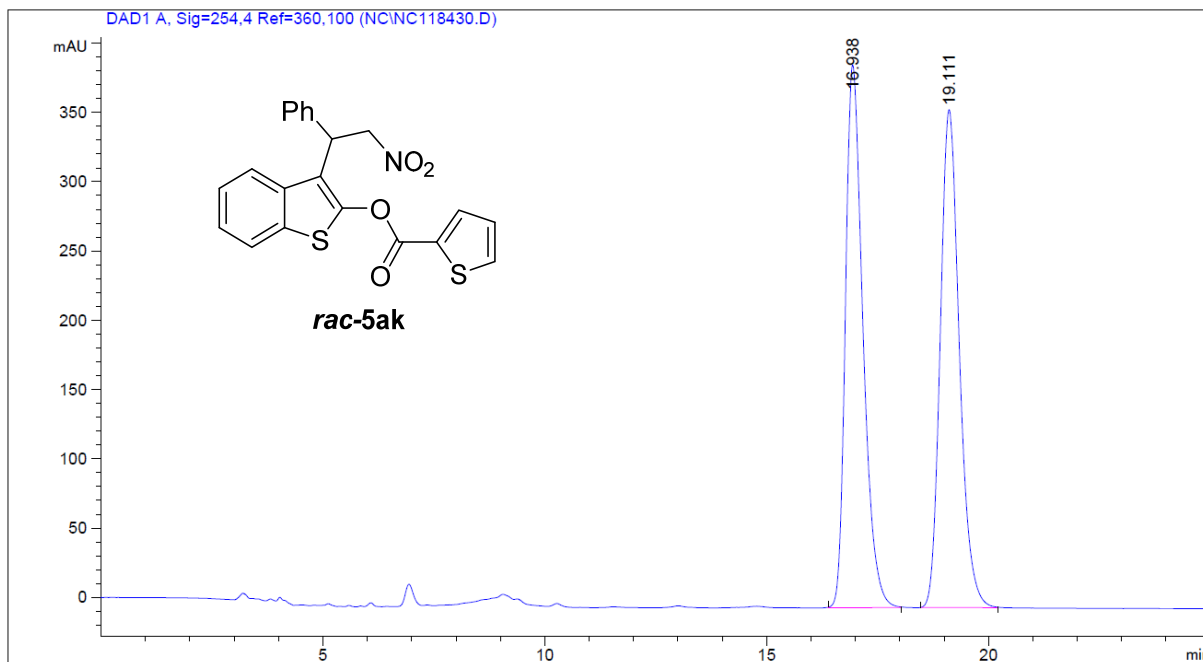

| Peak # | RetTime [min] | Type | Width [min] | Area [mAU*s] | Height [mAU] | Area %  |
|--------|---------------|------|-------------|--------------|--------------|---------|
| 1      | 16.938        | BB   | 0.4196      | 1.07286e4    | 391.67914    | 50.0232 |
| 2      | 19.111        | BB   | 0.4580      | 1.07187e4    | 359.29184    | 49.9768 |

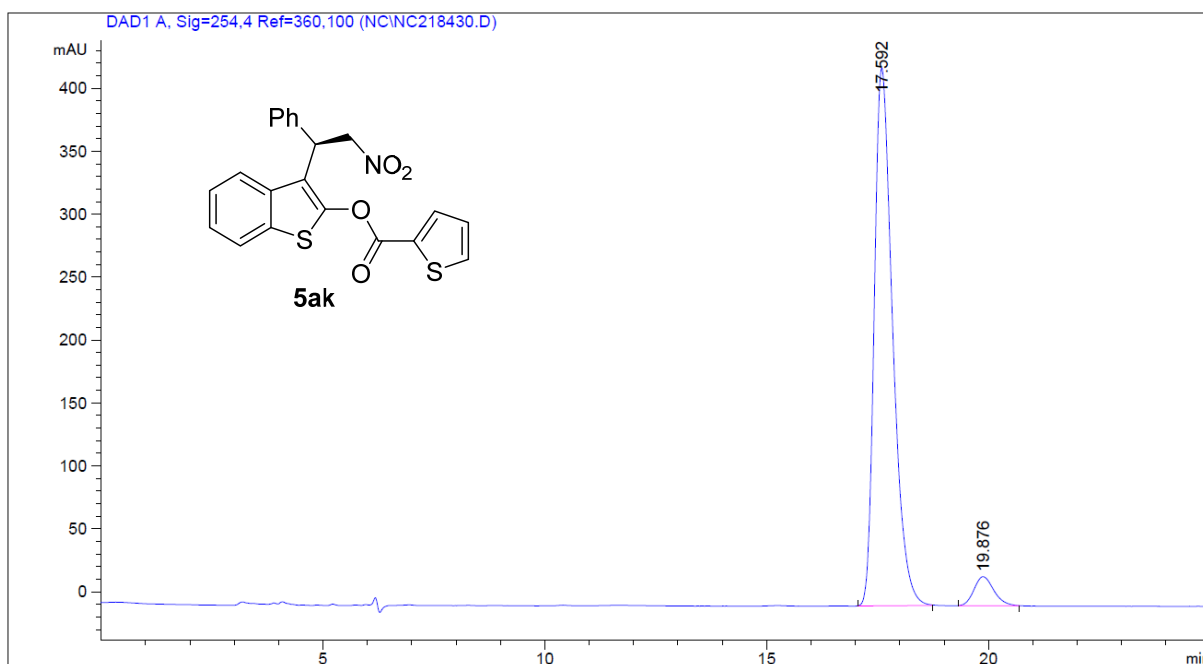

| Peak # | RetTime [min] | Type | Width [min] | Area [mAU*s] | Height [mAU] | Area %  |
|--------|---------------|------|-------------|--------------|--------------|---------|
| 1      | 17.592        | BB   | 0.4380      | 1.22330e4    | 427.26935    | 94.4253 |
| 2      | 19.876        | BB   | 0.4773      | 722.21545    | 23.19302     | 5.5747  |

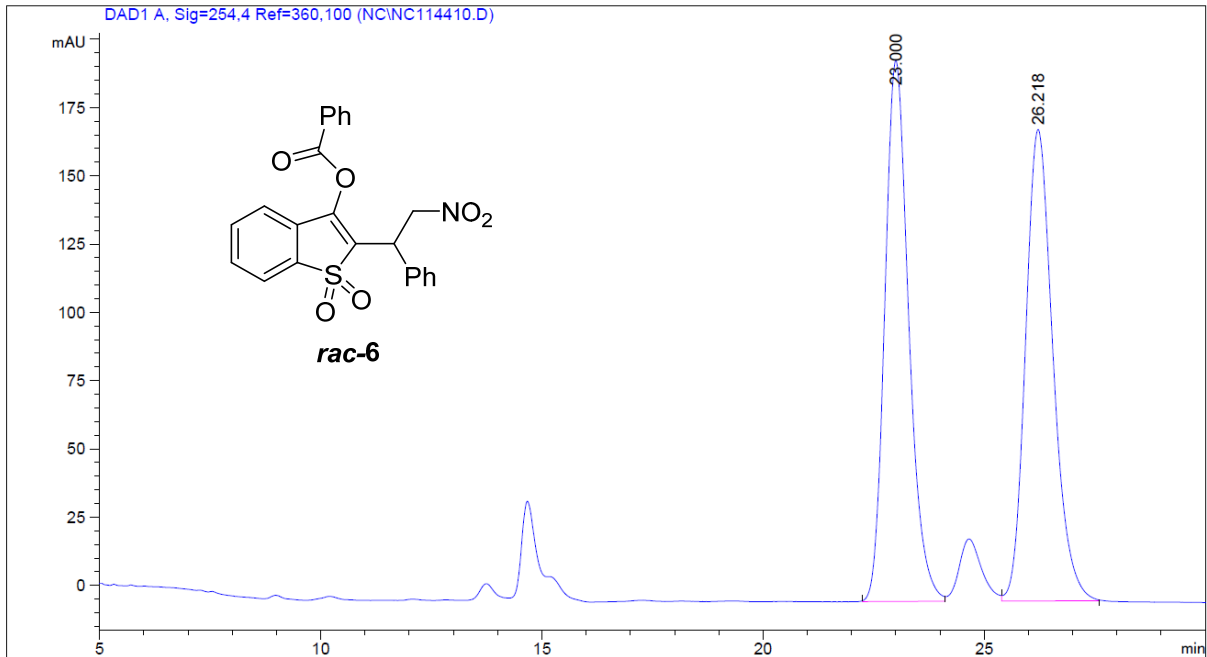

| Peak # | RetTime [min] | Type | Width [min] | Area [mAU*s] | Height [mAU] | Area %  |
|--------|---------------|------|-------------|--------------|--------------|---------|
| 1      | 23.000        | BB   | 0.5775      | 7427.56445   | 198.06184    | 49.9833 |
| 2      | 26.218        | VB   | 0.6623      | 7432.52393   | 172.64172    | 50.0167 |

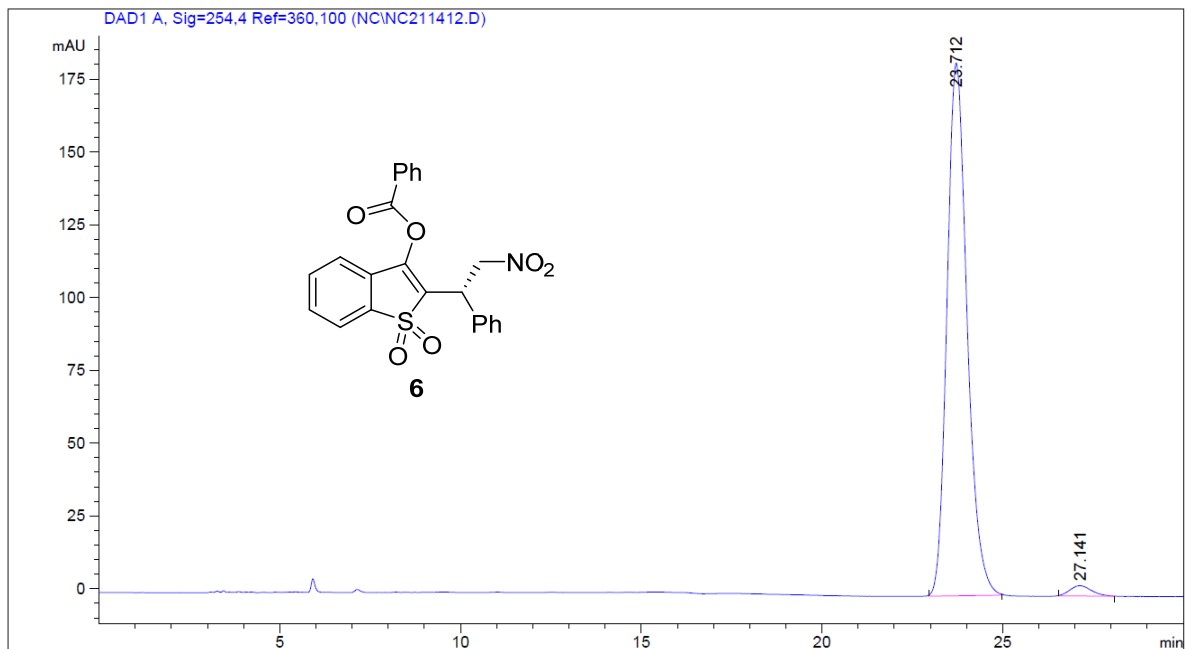

| Peak # | RetTime [min] | Type | Width [min] | Area [mAU*s] | Height [mAU] | Area %  |
|--------|---------------|------|-------------|--------------|--------------|---------|
| 1      | 23.712        | BB   | 0.5886      | 7066.24463   | 182.96451    | 97.9581 |
| 2      | 27.141        | BB   | 0.5126      | 147.29483    | 3.53126      | 2.0419  |
